# Supplementary material
Source: publisher figshare collection journal article supplement (https://diabetesjournals.figshare.com/articles/dataset/_/15113193)
Supplement: Supplementary file 1 [file 1]

## Sheet: SIDD
Table S7 Proteins associated with each of the clusters
SIDD
Unadjusted model									Adjusted model
Variable	Name	Effect	Lower	Upper	P-value	I2	Heterogeneity	P-value (FDR)	Effect	Lower	Upper	P-value	P-value (FDR)
SL010501	MP2K2	-0.444128	-0.619059	-0.269196	6.48801e-07	0	0.711187	0.000421326	-0.384711	-0.562154	-0.207267	2.14397e-05	0.00387558
SL000498	Leptin	-0.442092	-0.616788	-0.267395	7.05148e-07	0	0.728024	0.000421326	-0.450436	-0.62848	-0.272392	7.10272e-07	0.000282925
SL000053	tPA	-0.419945	-0.59497	-0.244919	2.56859e-06	0	0.487473	0.00102316	-0.462045	-0.640087	-0.284003	3.64922e-07	0.000218041
SL000051	CRP	-0.379764	-0.554991	-0.204538	2.15894e-05	0	0.934756	0.00564152	-0.468996	-0.645621	-0.292372	1.94674e-07	0.000218041
SL010464	LRIG3	0.37843	0.202991	0.553868	2.36047e-05	0	0.621359	0.00564152	0.385754	0.20729	0.564218	2.27022e-05	0.00387558
SL014092	CDON	0.374088	0.198824	0.549352	2.87186e-05	0	0.96122	0.00571979	0.391899	0.213392	0.570407	1.68539e-05	0.00387558
SL000551	PKC-A	0.363343	0.188594	0.538092	4.59743e-05	0	0.339015	0.00784846	0.395775	0.217865	0.573685	1.30009e-05	0.00387558
SL004714	LIF sR	0.342584	0.167359	0.517809	0.000127135	0	0.67121	0.0189907	0.218639	0.0441422	0.393136	0.0140582	0.466654
SL000272	Antithrombin III	0.315604	0.139585	0.491622	0.000440998	0	0.432617	0.0585548	0.36488	0.185979	0.54378	6.40227e-05	0.00956339
SL003918	kallikrein 13	0.293358	0.116928	0.469788	0.00111835	0	0.734145	0.133642	0.253794	0.0745864	0.433002	0.00550827	0.324087
SL000357	Coagulation Factor IX	-0.293661	-0.476617	-0.110704	0.00165575	0.0523978	0.304291	0.179874	-0.332436	-0.631284	-0.0335883	0.029239	0.635283
SL004536	LEAP-1	0.278656	0.102119	0.455193	0.00197667	0	0.874953	0.196843	0.298094	0.11819	0.477999	0.0011639	0.115905
SL004009	RAC1	0.27376	0.0976852	0.449834	0.00230874	0	0.512847	0.203612	0.286224	0.10668	0.465768	0.00178094	0.150329
SL000519	MIP-1a	-0.273685	-0.450282	-0.0970888	0.00238542	0	0.32715	0.203612	-0.25794	-0.47705	-0.0388309	0.0210375	0.529912
SL006992	MATN3	0.266872	0.0903578	0.443385	0.00304385	0	0.450544	0.233618	0.248173	0.0683478	0.427999	0.00683241	0.334283
SL004400	Coagulation Factor IXab	-0.316249	-0.527167	-0.10533	0.00329538	0.244245	0.250022	0.233618	-0.351273	-0.671867	-0.0306784	0.0317521	0.654203
SL007651	FGF23	-0.261556	-0.437233	-0.0858803	0.00352167	0	0.588865	0.233618	-0.252538	-0.431689	-0.0733866	0.00573019	0.324087
SL001802	IFN-g	0.262017	0.0853681	0.438666	0.00364746	0	0.524666	0.233618	0.234366	0.0543954	0.414336	0.0106997	0.44523
SL004557	CD59	-0.260375	-0.436883	-0.0838676	0.00383724	0	0.380802	0.233618	-0.197733	-0.376684	-0.0187828	0.0303353	0.647334
SL001774	FABP	-0.258398	-0.433924	-0.0828724	0.00390993	0	0.341142	0.233618	-0.306623	-0.484948	-0.128298	0.000751459	0.0897993
SL004876	Kallistatin	0.255729	0.0792555	0.432202	0.00450856	0	0.692232	0.256559	0.277975	0.0981594	0.45779	0.00244644	0.182719
SL003183	IP-10	-0.248536	-0.424122	-0.0729499	0.00553273	0	0.526489	0.292127	-0.24936	-0.428441	-0.0702787	0.00635012	0.32993
SL001990	IL-1Ra	-0.244204	-0.417056	-0.0713517	0.00562253	0	0.973629	0.292127	-0.333195	-0.506919	-0.159472	0.000170499	0.0226385
SL004118	TrATPase	0.238244	0.0622663	0.414222	0.00796713	0	0.703752	0.385456	0.231471	0.0520711	0.410871	0.0114438	0.44523
SL007207	TSP4	-0.356385	-0.620032	-0.0927379	0.00806393	0.501714	0.156587	0.385456	-0.285979	-0.463939	-0.108018	0.00163488	0.150283
SL004865	Cadherin-6	0.233521	0.0573082	0.409734	0.0093936	0	0.626279	0.423087	0.193994	0.0147774	0.37321	0.0338736	0.654925
SL004346	IL-20	0.231847	0.0564917	0.407203	0.00955928	0.0065473	0.315721	0.423087	0.242404	0.0127065	0.472102	0.0386038	0.709716
SL004858	GFRa-1	-0.229907	-0.406127	-0.0536871	0.0105553	0	0.42829	0.450485	-0.250865	-0.433466	-0.0682653	0.00708761	0.334283
SL000251	a2-HS-Glycoprotein	0.226575	0.0502685	0.402882	0.011776	0	0.728925	0.485252	0.215123	0.0353649	0.394881	0.0189986	0.504517
SL003340	YKL-40	-0.221174	-0.396289	-0.046059	0.0133059	0	0.788204	0.530017	-0.218139	-0.3966	-0.0396779	0.0165873	0.491551
SL000310	C1r	-0.217804	-0.393348	-0.0422593	0.0150244	0	0.724812	0.573678	-0.200692	-0.379656	-0.0217271	0.0279554	0.630314
SL000645	MMP-10	0.217909	0.0416953	0.394122	0.0153621	0	0.74691	0.573678	0.229241	0.0496936	0.408788	0.0123345	0.44523
SL000563	RANTES	-0.212095	-0.387845	-0.0363447	0.0180164	0	0.666939	0.617524	-0.181243	-0.360242	-0.002245	0.047195	0.775319
SL011509	PYY	0.454937	0.0779028	0.83197	0.0180334	0.749763	0.0456025	0.617524	0.46415	0.113812	0.814487	0.0094128	0.416604
SL002525	C2	0.265719	0.0453999	0.486038	0.0180865	0.294195	0.233927	0.617524	0.11161	-0.109826	0.333046	0.323213	0.993301
SL000523	MMP-13	-0.203667	-0.374078	-0.0332546	0.0191583	0	0.755406	0.630974	-0.197734	-0.371498	-0.0239696	0.0257257	0.602788
SL000541	Plasminogen	0.2779	0.0446482	0.511151	0.0195364	0.36769	0.208544	0.630974	0.326412	0.0486061	0.604219	0.0212852	0.529912
SL004354	IL-19	0.206941	0.0310796	0.382802	0.0210914	0	0.718252	0.663268	0.0991764	-0.0770204	0.275373	0.269936	0.993301
SL000440	Hemopexin	0.205658	0.0290045	0.382311	0.022503	0	0.580904	0.689515	0.229092	0.0491036	0.409081	0.0126074	0.44523
SL004588	IL-1 R AcP	0.198654	0.0224416	0.374867	0.0271346	0	0.396147	0.740688	0.270282	0.0919134	0.44865	0.00297863	0.20938
SL005209	Notch-3	-0.197756	-0.373792	-0.02172	0.02768	0	0.885036	0.740688	-0.175298	-0.354699	0.00410274	0.0554745	0.775319
SL003323	PARC	-0.26907	-0.509127	-0.0290123	0.0280321	0.39684	0.197883	0.740688	-0.26728	-0.587558	0.0529979	0.101915	0.953592
SL001938	Activin A	-0.284165	-0.538368	-0.0299633	0.0284526	0.465286	0.171457	0.740688	-0.268825	-0.516893	-0.0207576	0.0336728	0.654925
SL013490	BOC	0.19715	0.0205685	0.373732	0.0286504	0	0.987665	0.740688	0.175084	-0.00470571	0.354874	0.0563053	0.775319
SL000070	Glypican 3	0.19533	0.0183338	0.372325	0.0305424	0	0.357667	0.740688	0.180838	0.000394184	0.361283	0.0495016	0.775319
SL007206	TSP2	-0.193066	-0.368738	-0.0173934	0.0312385	0	0.829716	0.740688	-0.280809	-0.457923	-0.103695	0.00188697	0.150329
SL012561	REG4	0.498881	0.0437154	0.954046	0.0316975	0.825455	0.0166852	0.740688	0.557509	0.168246	0.946772	0.00499906	0.314414
SL002704	PTN	-0.19332	-0.369786	-0.0168532	0.0317816	0	0.678976	0.740688	-0.0991886	-0.276756	0.0783783	0.27359	0.993301
SL010388	Trypsin 2	-0.191347	-0.366514	-0.0161809	0.0322728	0	0.611111	0.740688	-0.138669	-0.316536	0.039198	0.126505	0.953592
SL004747	ApoM	0.19191	0.0156892	0.36813	0.0328049	0	0.820518	0.740688	0.298489	0.121713	0.475266	0.000934855	0.101559
SL010830	41	0.191789	0.0153814	0.368196	0.0331008	0	0.820716	0.740688	0.212707	0.0329283	0.392486	0.0203977	0.529896
SL012769	FAM3D	0.237547	0.0189299	0.456163	0.0331983	0.29273	0.234412	0.740688	0.222714	0.0393794	0.406048	0.0172678	0.491551
SL007756	GDF2	0.267256	0.0203329	0.51418	0.0338918	0.424106	0.187592	0.740688	0.219183	0.0394924	0.398873	0.0168151	0.491551
SL018509	RSPO3	-0.191332	-0.368304	-0.0143595	0.0340909	0	0.537015	0.740688	-0.171709	-0.352103	0.00868501	0.062097	0.783856
SL005172	IGFBP-6	-0.190587	-0.366916	-0.0142587	0.0341366	0	0.367104	0.740688	-0.137725	-0.31683	0.0413808	0.131777	0.953592
SL011809	XTP3A	-0.190263	-0.366853	-0.0136734	0.0347101	0	0.564045	0.740688	-0.170769	-0.350775	0.0092362	0.0629709	0.783856
SL000678	Granulysin	-0.188396	-0.36498	-0.0118125	0.0365213	0	0.569393	0.765666	-0.186285	-0.36638	-0.00618919	0.0426296	0.744396
SL003869	MIC-1	0.24676	0.0145886	0.478932	0.0372404	0.363929	0.209895	0.76728	0.22883	0.0497782	0.407881	0.0122502	0.44523
SL001753	Sialoadhesin	0.242099	0.0128628	0.471335	0.0384579	0.342854	0.217358	0.778936	0.246486	0.0664971	0.426475	0.0072731	0.334283
SL010454	Contactin-4	0.183026	0.00666568	0.359387	0.0419473	0	0.327491	0.809801	0.148716	-0.0306326	0.328064	0.104119	0.953592
SL009324	FSTL3	-0.292949	-0.576401	-0.00949713	0.0428024	0.568142	0.128084	0.809801	-0.259487	-0.528948	0.00997527	0.0591055	0.775319
SL006374	BMX	0.251435	0.00714225	0.495728	0.0436677	0.436964	0.182631	0.809801	0.255162	0.0781598	0.432164	0.00472161	0.313463
SL004516	MBL	0.276267	0.00651642	0.546018	0.0447165	0.516668	0.150323	0.809801	0.289349	0.06092	0.517778	0.0130402	0.44523
SL000076	p27Kip1	0.180432	0.00325205	0.357612	0.0459407	0	0.817989	0.809801	0.18191	0.00120214	0.362617	0.0484953	0.775319
SL000449	HSP 40	0.179383	0.00318862	0.355576	0.0459956	0	0.57914	0.809801	0.176775	-0.0029142	0.356464	0.0538331	0.775319
SL001777	Cystatin C	-0.179843	-0.356504	-0.00318112	0.0460149	0	0.575067	0.809801	-0.0876763	-0.265405	0.0900522	0.333603	0.993301
SL000019	Apo A-I	0.179391	0.00307602	0.355706	0.0461348	0	0.808232	0.809801	0.193883	0.0141151	0.373651	0.0345274	0.654925
SL000142	TS	-0.180029	-0.357052	-0.00300651	0.0462339	0	0.729039	0.809801	-0.142493	-0.322441	0.0374553	0.12066	0.953592
SL004708	CTAP-III	0.179018	0.00252536	0.355511	0.0468108	0	0.931611	0.809801	0.178703	-0.00129892	0.358706	0.0516763	0.775319
SL014009	HDGR2	-0.178888	-0.355753	-0.00202336	0.047436	0	0.556193	0.809801	-0.178494	-0.35888	0.00189294	0.0524531	0.775319
SL005685	EF-1-beta	0.178286	0.00140148	0.35517	0.0482122	0	0.610389	0.811459	0.205195	0.0249839	0.385407	0.0256357	0.602788
SL004271	GFAP	0.177286	0.000425695	0.354147	0.0494511	0	0.965885	0.814102	0.163028	-0.0172914	0.343347	0.0763918	0.852912
SL006108	CD5L	-0.176338	-0.352731	5.39305e-05	0.0500701	0	0.869464	0.814102	-0.158037	-0.337464	0.0213906	0.0842926	0.90111
SL003190	MIP-5	0.192773	-0.000346942	0.385892	0.050413	0.130481	0.283536	0.814102	0.232192	0.0410407	0.423342	0.0172763	0.491551
SL000345	Cathepsin G	-0.175003	-0.351504	0.00149705	0.0519751	0	0.526248	0.820887	-0.155496	-0.33538	0.0243889	0.0902215	0.933281
SL000560	P-Selectin	0.1737	-0.00249971	0.349899	0.05334	0	0.591504	0.820887	0.145832	-0.0336012	0.325265	0.111175	0.953592
SL005230	UNC5H3	0.17401	-0.00263955	0.350659	0.0535229	0	0.979124	0.820887	0.215406	0.0356893	0.395123	0.0188145	0.504517
SL007531	BMPER	-0.174506	-0.351702	0.00269006	0.0535809	0	0.996399	0.820887	-0.167956	-0.348676	0.0127636	0.068525	0.822194
SL003179	Integrin a1b1	-0.172237	-0.348446	0.00397108	0.0553914	0	0.610495	0.837882	-0.223463	-0.42728	-0.0196458	0.0316437	0.654203
SL010456	CYTN	0.170174	-0.00627671	0.346624	0.0587253	0	0.385655	0.863078	0.229585	0.050549	0.408621	0.0119594	0.44523
SL000139	EPI	0.195853	-0.00722856	0.398934	0.0587312	0.227083	0.255349	0.863078	0.204296	-0.00320417	0.411797	0.0536442	0.775319
SL006924	ART	0.169983	-0.0066168	0.346583	0.0592238	0	0.390271	0.863078	0.220741	0.0414331	0.400049	0.015828	0.491551
SL007774	JAG2	0.168535	-0.00708695	0.344156	0.0599893	0	0.477192	0.863701	0.184753	-0.00794211	0.377449	0.0602196	0.775319
SL004355	LD78-beta	-0.168466	-0.345514	0.0085831	0.0621888	0	0.386497	0.878565	-0.157607	-0.373339	0.0581248	0.152176	0.953592
SL004363	SCGF-alpha	-0.167295	-0.344258	0.00966749	0.063898	0	0.355816	0.878565	-0.155553	-0.383438	0.0723319	0.180942	0.968167
SL001800	TNF sR-II	-0.234821	-0.483708	0.0140648	0.0644283	0.444495	0.179693	0.878565	-0.236654	-0.469617	-0.00368979	0.0464801	0.775319
SL018887	QORL1	-0.166341	-0.343009	0.0103263	0.064979	0	0.754884	0.878565	-0.219443	-0.398899	-0.0399863	0.0165443	0.491551
SL000588	TMA	0.166463	-0.0106787	0.343605	0.0655029	0	0.345638	0.878565	0.162957	-0.0177071	0.343622	0.0770833	0.852912
SL005213	RELT	-0.166102	-0.343042	0.0108379	0.0657811	0	0.333216	0.878565	-0.13521	-0.375877	0.105457	0.270839	0.993301
SL001997	IL-1 sRI	0.291845	-0.0196179	0.603308	0.0662818	0.631879	0.0993159	0.878565	0.280464	0.0210347	0.539893	0.0341007	0.654925
SL007471	COLEC12	0.164867	-0.0117011	0.341434	0.0672383	0	0.637537	0.878565	0.177643	-0.00239258	0.357679	0.0531233	0.775319
SL000403	Endostatin	-0.164078	-0.340058	0.0119019	0.0676385	0	0.424776	0.878565	-0.0871535	-0.26507	0.0907627	0.337004	0.993301
SL012395	NET1	-0.162612	-0.338384	0.01316	0.0697976	0	0.993075	0.890883	-0.151523	-0.330759	0.0277131	0.0975359	0.945557
SL003680	sRAGE	-0.163505	-0.34042	0.0134094	0.0700779	0	0.669754	0.890883	-0.0900942	-0.269133	0.088945	0.324	0.993301
SL004872	EDAR	0.161961	-0.0142203	0.338143	0.0715819	0	0.84906	0.900426	0.173833	-0.00580697	0.353473	0.0578798	0.775319
SL007217	INGR2	0.161966	-0.0150385	0.338971	0.0729021	0	0.468757	0.903365	0.123168	-0.0569843	0.30332	0.180244	0.968167
SL000420	Ferritin	0.161241	-0.0154475	0.33793	0.0736777	0	0.846752	0.903365	0.129934	-0.0497542	0.309623	0.156405	0.953592
SL017189	Kininogen, HMW	0.219565	-0.0213735	0.460504	0.0740835	0.404659	0.194963	0.903365	0.212099	0.0300458	0.394152	0.0224048	0.546403
SL003710	Caspase-2	0.160333	-0.0169433	0.33761	0.0762884	0	0.807272	0.915276	0.189038	0.00843702	0.369639	0.0402157	0.728148
SL003187	MDC	-0.159065	-0.33537	0.01724	0.0770093	0	0.949294	0.915276	-0.177493	-0.357178	0.00219124	0.0528601	0.775319
SL002517	TNF-a	-0.158752	-0.335199	0.0176951	0.0778318	0	0.938622	0.915276	-0.152223	-0.332156	0.02771	0.0972922	0.945557
SL004260	resistin	-0.158128	-0.33455	0.0182935	0.0789636	0	0.379896	0.915276	-0.140563	-0.320364	0.0392387	0.125465	0.953592
SL010516	SRCN1	0.17842	-0.02088	0.377719	0.0793236	0.169913	0.272386	0.915276	0.199214	-0.017452	0.41588	0.0715308	0.838032
SL004692	CLF-1/CLC Complex	-0.158558	-0.335867	0.0187515	0.0796558	0	0.403398	0.915276	-0.144267	-0.325052	0.0365186	0.117805	0.953592
SL005221	SREC-I	-0.155545	-0.331577	0.020488	0.0833004	0	0.744005	0.93174	-0.151517	-0.331056	0.0280223	0.0981164	0.945557
SL011406	PDE7A	0.155767	-0.0208236	0.332357	0.083837	0	0.594513	0.93174	0.195611	0.015938	0.375285	0.0328572	0.654925
SL000283	b2-Microglobulin	-0.155584	-0.332278	0.0211098	0.0843826	0	0.64535	0.93174	-0.0910935	-0.2696	0.0874133	0.317221	0.993301
SL000346	Cathepsin H	0.155069	-0.0215521	0.33169	0.085287	0	0.521494	0.93174	0.0829629	-0.0958509	0.261777	0.363165	0.993301
SL010504	MAPK5	-0.155084	-0.33224	0.0220731	0.0862061	0	0.851214	0.93174	-0.147958	-0.328611	0.0326961	0.108442	0.953592
SL004362	SCGF-beta	-0.154421	-0.33146	0.0226185	0.0873474	0	0.323835	0.93174	-0.15166	-0.417018	0.113697	0.262635	0.993301
SL010390	URB	-0.219975	-0.472614	0.0326643	0.0879047	0.450595	0.177295	0.93174	-0.164228	-0.343785	0.0153277	0.0730284	0.847271
SL007547	TIMD3	-0.279066	-0.599851	0.0417177	0.0881809	0.656214	0.0880983	0.93174	-0.308342	-0.628777	0.0120924	0.059295	0.775319
SL004589	Azurocidin	-0.152803	-0.329139	0.0235316	0.0894303	0	0.816845	0.93174	-0.143223	-0.32305	0.0366045	0.118522	0.953592
SL003326	I-TAC	-0.226996	-0.489317	0.0353256	0.0898813	0.488964	0.161855	0.93174	-0.251603	-0.538103	0.0348976	0.0852096	0.90111
SL004335	FGF-17	0.173105	-0.0277437	0.373954	0.0911755	0.174232	0.271135	0.93174	0.19885	-0.060124	0.457824	0.132341	0.953592
SL012168	LIN7B	-0.147449	-0.318702	0.0238043	0.0915019	0	0.733041	0.93174	-0.138918	-0.313528	0.035693	0.118921	0.953592
SL005087	IGFBP-7	-0.150764	-0.326359	0.0248313	0.0924136	0	0.395987	0.93174	-0.159674	-0.338738	0.019391	0.0805128	0.882686
SL007673	NET4	-0.148703	-0.322666	0.0252596	0.0938607	0	0.878108	0.93174	-0.198534	-0.375117	-0.0219519	0.0275512	0.630314
SL005220	Sonic Hedgehog	0.149468	-0.026101	0.325037	0.0951995	0	0.720896	0.93174	0.144275	-0.0347757	0.323326	0.114268	0.953592
SL004915	NCC27	0.150246	-0.0263003	0.326793	0.0953184	0	0.34452	0.93174	0.124404	-0.0669639	0.315773	0.202617	0.993301
SL003167	BLC	-0.150237	-0.326969	0.0264959	0.0956886	0	0.461419	0.93174	-0.140308	-0.320409	0.039794	0.126785	0.953592
SL005488	SPARCL1	-0.149735	-0.326151	0.0266819	0.0962061	0	0.628599	0.93174	-0.16665	-0.346144	0.0128443	0.0688029	0.822194
SL007336	SET	0.149802	-0.0269055	0.326509	0.0966053	0	0.640254	0.93174	0.185728	0.00586599	0.365589	0.0429819	0.744396
SL005168	Growth hormone receptor	-0.256364	-0.558842	0.046115	0.0966826	0.607092	0.110635	0.93174	-0.330517	-0.627235	-0.0337987	0.0290196	0.635283
SL004921	NDP kinase B	0.148588	-0.0282014	0.325377	0.0994942	0	0.382881	0.943231	0.121766	-0.0583127	0.301845	0.185074	0.968167
SL003970	PTH	-0.196379	-0.43021	0.0374532	0.0997569	0.369991	0.207715	0.943231	-0.195127	-0.441336	0.0510829	0.120348	0.953592
SL007310	RAC3	0.147641	-0.028975	0.324256	0.101334	0	0.522348	0.943231	0.134778	-0.0450076	0.314564	0.14175	0.953592
SL003189	MIP-3b	-0.146193	-0.322408	0.0300226	0.103942	0	0.698696	0.943231	-0.137206	-0.316526	0.0421136	0.133702	0.953592
SL006610	ATS13	0.146757	-0.0301554	0.323669	0.103975	0	0.525738	0.943231	0.121719	-0.0581858	0.301624	0.184819	0.968167
SL005675	ATP synthase beta chain	0.146329	-0.0301851	0.322843	0.104206	0	0.377467	0.943231	0.15869	-0.0211529	0.338533	0.0837313	0.90111
SL004853	B7-H2	-0.146387	-0.323093	0.0303196	0.104446	0	0.896175	0.943231	-0.14551	-0.325739	0.0347192	0.113559	0.953592
SL006476	NMT1	0.182069	-0.0379315	0.40207	0.104796	0.318528	0.225755	0.943231	0.167871	-0.038453	0.374196	0.110783	0.953592
SL007151	GPDA	-0.146322	-0.323295	0.0306509	0.105123	0	0.871344	0.943231	-0.249346	-0.427082	-0.0716089	0.00596645	0.324087
SL003643	Glutathione S-transferase Pi	-0.144682	-0.32024	0.0308748	0.106252	0	0.359049	0.943231	-0.0534542	-0.277779	0.17087	0.640472	0.993301
SL007122	IDE	0.144765	-0.0313382	0.320867	0.10714	0	0.329128	0.943231	0.119989	-0.0593085	0.299287	0.189641	0.976815
SL008486	LEG9	-0.144763	-0.321005	0.0314779	0.107419	0	0.72113	0.943231	-0.14879	-0.328461	0.0308807	0.104569	0.953592
SL004804	Nectin-like protein 1	0.14436	-0.032037	0.320756	0.108715	0	0.935187	0.943231	0.123272	-0.0564841	0.303029	0.178918	0.968167
SL016555	PDE11	0.143753	-0.0324802	0.319987	0.109879	0	0.345924	0.943231	0.11486	-0.0890851	0.318806	0.269665	0.993301
SL003657	Calcineurin	-0.142589	-0.317437	0.0322585	0.109963	0	0.670743	0.943231	-0.0826724	-0.260061	0.0947161	0.361008	0.993301
SL002506	suPAR	-0.14343	-0.320698	0.033837	0.112775	0	0.496811	0.943231	-0.12711	-0.307772	0.0535522	0.167899	0.968167
SL005034	RAN	0.142196	-0.0345748	0.318966	0.114885	0	0.353936	0.943231	0.121433	-0.0587465	0.301612	0.186525	0.968167
SL000268	Angiostatin	0.217567	-0.0529711	0.488104	0.114979	0.517521	0.149963	0.943231	0.261737	-0.0502697	0.573743	0.100139	0.953592
SL008909	LGMN	0.141244	-0.0350145	0.317503	0.116273	0	0.79575	0.943231	0.107154	-0.0721924	0.2865	0.241591	0.993301
SL014896	ANK2	0.140164	-0.0350951	0.315424	0.117001	0	0.810707	0.943231	0.135175	-0.0435438	0.313893	0.138226	0.953592
SL004579	Macrophage mannose receptor	-0.140751	-0.31708	0.0355787	0.117701	0	0.450624	0.943231	-0.172111	-0.351703	0.00748192	0.0603386	0.775319
SL005630	PSA6	0.136542	-0.0345524	0.307636	0.117782	0	0.911846	0.943231	0.125492	-0.048896	0.29988	0.158417	0.960819
SL004337	FGF-19	-0.17304	-0.39025	0.0441692	0.118427	0.291637	0.234774	0.943231	-0.0977911	-0.319709	0.124127	0.387762	0.993301
SL000572	SAA	-0.140447	-0.316833	0.0359385	0.118613	0	0.71503	0.943231	-0.141528	-0.321359	0.0383027	0.122951	0.953592
SL008516	CYTT	0.209451	-0.0537994	0.472701	0.118898	0.497422	0.158368	0.943231	0.279625	0.0596317	0.499617	0.01273	0.44523
SL007502	ST4S6	-0.139862	-0.316361	0.0366366	0.120393	0	0.951136	0.943231	-0.123144	-0.303071	0.0567834	0.179785	0.968167
SL010927	IMB1	0.140015	-0.0366973	0.316728	0.120436	0	0.630123	0.943231	0.132331	-0.0478591	0.312521	0.15004	0.953592
SL000527	MMP-9	-0.139864	-0.31639	0.0366628	0.120447	0	0.723432	0.943231	-0.137942	-0.317983	0.0420985	0.133182	0.953592
SL000130	Cyclin B1	-0.138212	-0.312803	0.0363793	0.120765	0	0.732649	0.943231	-0.119786	-0.297774	0.0582026	0.187152	0.968167
SL003785	GAPDH, liver	0.139561	-0.0371248	0.316246	0.121589	0	0.927772	0.943496	0.0906059	-0.0889223	0.270134	0.322579	0.993301
SL001888	SLPI	-0.145888	-0.331496	0.0397193	0.123429	0.0839574	0.296105	0.947414	-0.0695896	-0.247051	0.107872	0.442143	0.993301
SL002785	N-terminal pro-BNP	-0.140988	-0.321251	0.0392749	0.125292	0.032774	0.309248	0.947414	-0.124915	-0.325661	0.0758311	0.222619	0.993301
SL002565	c-Myc	0.138155	-0.0389107	0.31522	0.126201	0	0.677135	0.947414	0.13083	-0.0494973	0.311156	0.155032	0.953592
SL004008	Proteinase-3	-0.137546	-0.314077	0.0389854	0.12673	0	0.80085	0.947414	-0.14964	-0.329634	0.0303533	0.103219	0.953592
SL000250	a2-Antiplasmin	0.137551	-0.0390322	0.314133	0.126828	0	0.911977	0.947414	0.13919	-0.04091	0.31929	0.129834	0.953592
SL003168	CTACK	-0.137881	-0.315163	0.0394003	0.127417	0	0.623951	0.947414	-0.11256	-0.293181	0.0680621	0.221932	0.993301
SL000603	Trypsin	-0.135416	-0.309873	0.0390397	0.128168	0	0.938884	0.947414	-0.0540612	-0.230236	0.122114	0.547549	0.993301
SL000526	MMP-8	-0.136076	-0.312186	0.0400341	0.12992	0	0.91983	0.947414	-0.170293	-0.349459	0.00887209	0.0624751	0.783856
SL002078	TGF-b R II	0.13657	-0.0403251	0.313465	0.130237	0	0.554186	0.947414	0.150363	-0.0299862	0.330712	0.102241	0.953592
SL000485	IL-9	0.135886	-0.0401655	0.311938	0.130329	0	0.851091	0.947414	0.098044	-0.0807089	0.276797	0.282366	0.993301
SL014470	BCAR3	0.135926	-0.0404916	0.312344	0.131015	0	0.618687	0.947414	0.108507	-0.071138	0.288153	0.236478	0.993301
SL000450	HSP 60	-0.135929	-0.312622	0.0407636	0.131607	0	0.918363	0.947414	-0.153337	-0.33342	0.0267458	0.0951428	0.945557
SL010491	CAMK2A	0.138213	-0.0423704	0.318796	0.13359	0.0387103	0.307759	0.950059	0.118726	-0.0606049	0.298056	0.194428	0.987217
SL005184	IL-23	-0.183762	-0.425315	0.05779	0.135947	0.401717	0.196065	0.950059	-0.169855	-0.400097	0.0603875	0.148203	0.953592
SL000088	TGF-b2	-0.1285	-0.298066	0.0410651	0.137463	0	0.386433	0.950059	-0.127056	-0.299928	0.0458171	0.149724	0.953592
SL001996	Angiopoietin-2	-0.133471	-0.309679	0.0427373	0.137651	0	0.368709	0.950059	-0.163973	-0.344859	0.0169141	0.0756185	0.852912
SL004351	IL-17E	0.133841	-0.0431705	0.310852	0.138352	0	0.351421	0.950059	0.163331	-0.016977	0.343639	0.0758282	0.852912
SL000271	Angiotensinogen	-0.133123	-0.309361	0.0431144	0.138745	0	0.585221	0.950059	-0.138038	-0.317739	0.0416626	0.132181	0.953592
SL004866	Carbonic anhydrase I	0.133472	-0.0433922	0.310336	0.139113	0	0.983182	0.950059	0.168513	-0.0115526	0.348579	0.0666217	0.812377
SL001999	MDM2	-0.133389	-0.310899	0.0441223	0.140807	0	0.443303	0.950059	-0.135708	-0.316745	0.0453286	0.141773	0.953592
SL002688	Osteopontin	-0.131498	-0.306609	0.0436139	0.141073	0	0.866371	0.950059	-0.106863	-0.285284	0.071559	0.24044	0.993301
SL000319	C5	0.153267	-0.0514712	0.358005	0.142314	0.205388	0.26194	0.950059	0.0901026	-0.116777	0.296982	0.393312	0.993301
SL000532	ON	0.13229	-0.044611	0.309191	0.14273	0	0.342951	0.950059	0.0976035	-0.0825032	0.27771	0.28817	0.993301
SL004367	DKK1	0.131917	-0.0445486	0.308383	0.142874	0	0.73384	0.950059	0.132502	-0.0474846	0.312488	0.149055	0.953592
SL004125	IR	-0.210726	-0.492673	0.0712215	0.142957	0.549536	0.136239	0.950059	-0.316122	-0.613463	-0.018781	0.0371819	0.694256
SL007804	BGN	0.131795	-0.0446093	0.308199	0.143105	0	0.943506	0.950059	0.123977	-0.0558678	0.303822	0.176659	0.968167
SL000581	SOD	0.26893	-0.0946259	0.632485	0.147107	0.723179	0.0573487	0.970043	0.294922	-0.0879297	0.677774	0.13109	0.953592
SL007059	LY86	0.129997	-0.0460962	0.306091	0.147924	0	0.718758	0.970043	0.154474	-0.0248255	0.333773	0.0912979	0.933281
SL004712	SDF-1	-0.129818	-0.306269	0.0466332	0.149309	0	0.676483	0.970043	-0.104585	-0.284375	0.0752058	0.254237	0.993301
SL009951	WNT7A	0.167757	-0.0602916	0.395805	0.149362	0.387068	0.201495	0.970043	0.162274	-0.013059	0.337607	0.0696803	0.824435
SL004626	ADAMTS-5	-0.129802	-0.307011	0.0474062	0.151104	0	0.715575	0.970834	-0.112973	-0.293536	0.0675894	0.220087	0.993301
SL003672	SOD3	-0.129391	-0.306041	0.047258	0.151109	0	0.594586	0.970834	-0.104687	-0.284673	0.0752985	0.254288	0.993301
SL000309	C1q	-0.128869	-0.30585	0.0481131	0.153539	0	0.392147	0.978418	-0.0878574	-0.267924	0.0922097	0.338923	0.993301
SL006088	Sphingosine kinase 1	0.159153	-0.0596258	0.377932	0.153927	0.288214	0.235902	0.978418	0.166766	-0.0775687	0.411101	0.180982	0.968167
SL008574	OMD	-0.247162	-0.590034	0.0957098	0.157698	0.695631	0.0698947	0.99446	-0.168501	-0.502286	0.165284	0.322454	0.993301
SL012822	BSSP4	0.125843	-0.0489061	0.300592	0.158115	0	0.499467	0.99446	0.140628	-0.0374625	0.318719	0.121701	0.953592
SL001945	sE-Selectin	-0.145807	-0.348733	0.0571194	0.159049	0.19998	0.263558	0.9951	-0.243411	-0.445401	-0.0414216	0.018182	0.504517
SL006406	PLXC1	0.125985	-0.0509888	0.302959	0.162935	0	0.725507	0.995222	0.0374454	-0.140306	0.215197	0.679688	0.993301
SL008644	BST1	-0.126171	-0.30346	0.051119	0.163065	0	0.850756	0.995222	-0.126162	-0.306979	0.0546552	0.17146	0.968167
SL000125	IL-1a	0.125524	-0.0510284	0.302076	0.163474	0	0.564068	0.995222	0.137165	-0.0428672	0.317198	0.135364	0.953592
SL007620	IL-12 RB2	-0.145215	-0.35035	0.0599186	0.165299	0.203263	0.262577	0.995222	-0.143408	-0.32383	0.0370129	0.119261	0.953592
SL016129	FAM107B	0.165331	-0.0691078	0.399771	0.166908	0.389004	0.200783	0.995222	0.119899	-0.0579114	0.297709	0.186295	0.968167
SL003172	GCP-2	0.124421	-0.0523006	0.301142	0.167613	0	0.359131	0.995222	0.0780398	-0.101629	0.257709	0.394593	0.993301
SL008614	EFNB1	0.116853	-0.0491873	0.282894	0.167787	0	0.706031	0.995222	0.16489	-0.00377971	0.33356	0.0553596	0.775319
SL013165	HMGN1	-0.123346	-0.299975	0.0532841	0.171093	0	0.320476	0.995222	-0.122549	-0.313415	0.0683169	0.208236	0.993301
SL014071	FLRT1	0.120182	-0.0521242	0.292488	0.171607	0	0.861534	0.995222	0.120829	-0.0548838	0.296541	0.177733	0.968167
SL008331	PA2G4	0.16153	-0.0707101	0.39377	0.172815	0.362092	0.210552	0.995222	0.149358	-0.0813833	0.380098	0.204557	0.993301
SL000339	carbonic anhydrase II	-0.122852	-0.299652	0.0539477	0.173226	0	0.810107	0.995222	-0.131993	-0.312259	0.0482729	0.151256	0.953592
SL003170	Eotaxin-3	0.122999	-0.0540261	0.300025	0.173259	0	0.435929	0.995222	0.101541	-0.0787772	0.281858	0.269725	0.993301
SL008709	DSC3	-0.148749	-0.363489	0.0659918	0.174575	0.272395	0.241062	0.995222	-0.176382	-0.355451	0.00268623	0.0535372	0.775319
SL008609	FCG3B	-0.197093	-0.482974	0.0887888	0.176619	0.564642	0.129628	0.995222	-0.263414	-0.643794	0.116965	0.174691	0.968167
SL000424	Fibrinogen	0.121679	-0.0548553	0.298214	0.176716	0	0.914363	0.995222	0.174982	-0.00407208	0.354037	0.0554428	0.775319
SL011768	NUDC3	-0.121895	-0.298848	0.0550583	0.176975	0	0.712707	0.995222	-0.135847	-0.315885	0.0441915	0.139173	0.953592
SL000074	p53	0.121431	-0.0555867	0.298449	0.178786	0	0.721145	0.995222	0.104545	-0.0757336	0.284823	0.255706	0.993301
SL004153	M-CSF R	-0.22758	-0.55972	0.10456	0.179287	0.66879	0.0822825	0.995222	-0.3304	-0.719687	0.0588862	0.0962152	0.945557
SL001998	TFPI	-0.119933	-0.29525	0.0553833	0.179985	0	0.78076	0.995222	-0.146116	-0.32467	0.0324388	0.108739	0.953592
SL004248	GDNF	0.155644	-0.0723064	0.383595	0.180812	0.336591	0.219541	0.995222	0.12693	-0.0531715	0.307032	0.16718	0.968167
SL005688	14-3-3 protein zeta/delta	0.120564	-0.0561493	0.297277	0.181157	0	0.561207	0.995222	0.154528	-0.0248772	0.333933	0.0913756	0.933281
SL000247	6-Phosphogluconate dehydrogenase	0.119484	-0.0570962	0.296064	0.184767	0	0.670853	0.995222	0.112364	-0.0677213	0.292449	0.221361	0.993301
SL007295	CAD15	0.11944	-0.0573745	0.296255	0.185511	0	0.985036	0.995222	0.115573	-0.064736	0.295882	0.209014	0.993301
SL008039	AK1A1	-0.182481	-0.453028	0.0880673	0.186179	0.514355	0.151298	0.995222	-0.224733	-0.572993	0.123527	0.205954	0.993301
SL006803	ANGL3	-0.119008	-0.29612	0.0581037	0.187847	0	0.885472	0.995222	-0.134051	-0.314634	0.0465308	0.145686	0.953592
SL004845	EphB4	0.118101	-0.05832	0.294522	0.189502	0	0.601437	0.995222	0.104612	-0.0752086	0.284433	0.254192	0.993301
SL011535	RBM39	-0.114881	-0.286756	0.0569942	0.190184	0	0.588061	0.995222	-0.124182	-0.299431	0.0510668	0.164882	0.968167
SL005789	Stanniocalcin-1	-0.225076	-0.562201	0.112049	0.190691	0.689776	0.0725893	0.995222	-0.24806	-0.53413	0.0380101	0.0892168	0.933281
SL002644	ERBB1	0.121733	-0.0606661	0.304131	0.190847	0.0532245	0.30408	0.995222	0.0730928	-0.104601	0.250786	0.420118	0.993301
SL000480	IL-4	0.116941	-0.0582979	0.292179	0.190897	0	0.788108	0.995222	0.115163	-0.0634719	0.293799	0.206389	0.993301
SL006705	PFD5	0.17385	-0.0870874	0.434788	0.19161	0.477778	0.166421	0.995222	0.156504	-0.058636	0.371644	0.153932	0.953592
SL005357	PSP	0.299807	-0.15058	0.750193	0.192002	0.820872	0.0181398	0.995222	0.316697	-0.0873809	0.720776	0.124507	0.953592
SL000004	bFGF	0.117276	-0.0591635	0.293716	0.192659	0	0.536641	0.995222	0.121165	-0.0587861	0.301116	0.18694	0.968167
SL001717	IL-10	0.117979	-0.0595242	0.295483	0.192674	0	0.873332	0.995222	0.146565	-0.0342566	0.327387	0.11214	0.953592
SL004811	Transgelin-2	-0.116947	-0.292942	0.0590473	0.192785	0	0.449444	0.995222	-0.0871309	-0.26638	0.0921187	0.340735	0.993301
SL000633	Fas ligand, soluble	-0.117202	-0.294109	0.0597043	0.194118	0	0.786608	0.995222	-0.112621	-0.293049	0.0678068	0.221184	0.993301
SL000305	b-NGF	-0.117161	-0.294075	0.0597521	0.19429	0	0.992441	0.995222	-0.106709	-0.287109	0.073692	0.246319	0.993301
SL000591	TIMP-1	-0.116971	-0.293671	0.0597282	0.194475	0	0.64526	0.995222	-0.169435	-0.34891	0.0100414	0.0642693	0.791772
SL008023	HPLN1	0.217096	-0.111468	0.545661	0.19531	0.667497	0.0828803	0.995222	0.218035	-0.127661	0.563731	0.216393	0.993301
SL005185	IL-23 R	0.118523	-0.0610573	0.298104	0.195812	0.0224287	0.311822	0.995222	0.0678497	-0.151777	0.287477	0.544851	0.993301
SL011588	RS3A	-0.116509	-0.293484	0.0604662	0.196942	0	0.502374	0.995222	-0.105731	-0.286207	0.0747462	0.250875	0.993301
SL008402	LYPD3	0.116346	-0.0606335	0.293325	0.19758	0	0.437792	0.995222	0.0821782	-0.0979672	0.262324	0.371273	0.993301
SL004838	CD47	-0.115048	-0.290834	0.0607377	0.199578	0	0.867949	0.995222	-0.110561	-0.289662	0.0685411	0.226318	0.993301
SL005171	IGFBP-4	-0.145433	-0.36859	0.0777237	0.201487	0.315957	0.226629	0.995222	-0.145589	-0.324868	0.0336889	0.111461	0.953592
SL000613	uPA	-0.287658	-0.729706	0.15439	0.202158	0.815636	0.0198613	0.995222	-0.247631	-0.663249	0.167987	0.242898	0.993301
SL004610	LRP8	0.114754	-0.0619783	0.291485	0.203152	0	0.6286	0.995222	0.0967853	-0.0829169	0.276487	0.291146	0.993301
SL018629	RNF43	0.114224	-0.0627711	0.291219	0.20592	0	0.357086	0.995222	0.079466	-0.100726	0.259658	0.387392	0.993301
SL009328	CSH	0.113631	-0.0626891	0.28995	0.206548	0	0.467403	0.995222	0.142621	-0.0368216	0.322064	0.119285	0.953592
SL004145	HVEM	-0.113022	-0.28926	0.0632163	0.208779	0	0.952321	0.995222	-0.131242	-0.310813	0.0483294	0.152011	0.953592
SL003201	VEGF sR2	0.113508	-0.06349	0.290507	0.208784	0	0.965033	0.995222	0.0947886	-0.0852311	0.274808	0.302067	0.993301
SL004140	Ephrin-A4	0.113208	-0.0635411	0.289958	0.209348	0	0.895123	0.995222	0.132365	-0.0477798	0.31251	0.149832	0.953592
SL014069	PCSK7	0.112459	-0.0637579	0.288676	0.211	0	0.656353	0.995222	0.0672302	-0.111791	0.246251	0.461699	0.993301
SL004015	TAFI	0.345198	-0.196427	0.886822	0.211607	0.876482	0.00443635	0.995222	0.368399	-0.197948	0.934746	0.202337	0.993301
SL003307	IL-2 sRg	0.112333	-0.0640389	0.288706	0.211913	0	0.542109	0.995222	0.0971874	-0.0826369	0.277012	0.289474	0.993301
SL000426	Fibronectin	-0.149669	-0.384888	0.0855503	0.212355	0.380567	0.203877	0.995222	-0.141997	-0.321028	0.0370338	0.120058	0.953592
SL004081	Bone proteoglycan II	0.112233	-0.0641939	0.28866	0.212464	0	0.664656	0.995222	0.102303	-0.0776127	0.282219	0.265078	0.993301
SL000124	MMP-2	0.111792	-0.0646479	0.288233	0.214299	0	0.448069	0.995222	0.180895	0.0021758	0.359614	0.0472753	0.775319
SL014248	SEM6B	0.111681	-0.0648723	0.288234	0.21505	0	0.323487	0.995222	-0.0559504	-0.263881	0.15198	0.597922	0.993301
SL000084	EGF	0.18691	-0.108824	0.482643	0.215442	0.59293	0.117033	0.995222	0.163354	-0.160932	0.487639	0.323495	0.993301
SL016551	CK2-A2:B	0.111952	-0.0652217	0.289125	0.215548	0	0.435983	0.995222	0.131545	-0.0490656	0.312156	0.153433	0.953592
SL003327	Factor D	-0.137452	-0.355174	0.0802713	0.215956	0.283325	0.237507	0.995222	-0.137734	-0.316929	0.0414612	0.131945	0.953592
SL002541	sRANKL	0.111679	-0.0655782	0.288936	0.216885	0	0.744578	0.995222	0.106408	-0.0743785	0.287195	0.248662	0.993301
SL001726	GM-CSF	-0.111356	-0.288326	0.0656152	0.217475	0	0.909431	0.995222	-0.10959	-0.290048	0.0708683	0.233945	0.993301
SL000468	IgM	-0.110565	-0.286441	0.065311	0.217898	0	0.763121	0.995222	-0.0974544	-0.276277	0.0813687	0.28546	0.993301
SL000006	PAI-1	-0.109678	-0.284986	0.0656302	0.220119	0	0.918765	0.995222	-0.171766	-0.349318	0.00578675	0.0579488	0.775319
SL004863	TAJ	-0.109358	-0.284377	0.0656603	0.220703	0	0.388867	0.995222	-0.0831818	-0.261424	0.0950607	0.360364	0.993301
SL008102	MDHC	0.110476	-0.0664167	0.287369	0.220926	0	0.492131	0.995222	0.0931494	-0.0871823	0.273481	0.311342	0.993301
SL002519	ERBB3	0.11019	-0.0666402	0.287021	0.22196	0	0.415941	0.995222	0.0440815	-0.138237	0.226399	0.635581	0.993301
SL007056	BMP10	-0.108086	-0.281782	0.065609	0.222602	0	0.81607	0.995222	-0.146502	-0.323096	0.0300914	0.103952	0.953592
SL004837	Activin AB	-0.158123	-0.41248	0.0962336	0.223061	0.453958	0.175967	0.995222	-0.153785	-0.365507	0.0579371	0.154555	0.953592
SL005227	ULBP-1	-0.110172	-0.28743	0.067087	0.223157	0	0.442349	0.995222	-0.110797	-0.291504	0.0699112	0.229478	0.993301
SL001796	Myeloperoxidase	-0.10977	-0.286689	0.0671493	0.223961	0	0.887201	0.995222	-0.127304	-0.307671	0.0530633	0.166557	0.968167
SL005166	Galectin-7	0.108245	-0.0679691	0.284459	0.228601	0	0.816072	0.995222	0.134497	-0.0449988	0.313993	0.141938	0.953592
SL000570	Secretin	0.253412	-0.159145	0.665968	0.228628	0.782675	0.0319459	0.995222	0.223412	-0.16882	0.615643	0.26426	0.993301
SL000497	Laminin	0.10858	-0.0683081	0.285468	0.22894	0	0.875746	0.995222	-0.0235889	-0.199306	0.152129	0.792464	0.997339
SL007136	CEBPB	0.220845	-0.139765	0.581455	0.230014	0.717218	0.0600394	0.995222	0.178311	-0.181433	0.538056	0.331311	0.993301
SL007280	CATC	-0.108327	-0.285577	0.0689231	0.23098	0	0.951207	0.995222	-0.121854	-0.302494	0.0587863	0.186126	0.968167
SL005430	SECTM1	0.299701	-0.191014	0.790416	0.231293	0.848586	0.0101727	0.995222	0.293629	-0.153334	0.740591	0.197891	0.992271
SL000337	Calpain I	0.108097	-0.0689237	0.285117	0.231368	0	0.447252	0.995222	0.106967	-0.0735291	0.287462	0.245428	0.993301
SL001718	IL-13	-0.108158	-0.285547	0.0692304	0.232072	0	0.962932	0.995222	-0.104955	-0.285881	0.0759709	0.25555	0.993301
SL003329	HCC-1	-0.320694	-0.848591	0.207203	0.233785	0.869838	0.00557525	0.995222	-0.248991	-0.792316	0.294335	0.369082	0.993301
SL020172	RXFP1	0.10705	-0.0702692	0.284369	0.236707	0	0.484938	0.995222	0.0741853	-0.106346	0.254717	0.420588	0.993301
SL010488	ABL2	0.106087	-0.0703094	0.282483	0.2385	0	0.685794	0.995222	0.0870212	-0.0927258	0.266768	0.342682	0.993301
SL000342	Catalase	0.106418	-0.0706584	0.283495	0.238842	0	0.641514	0.995222	0.0952709	-0.0853041	0.275846	0.301102	0.993301
SL003191	NAP-2	0.105923	-0.0704476	0.282294	0.239157	0	0.828979	0.995222	0.105653	-0.0742091	0.285515	0.249607	0.993301
SL001943	IL-6 sRa	0.123735	-0.0830625	0.330532	0.240907	0.218762	0.257895	0.995222	0.0956821	-0.134352	0.325716	0.414934	0.993301
SL015728	GCKR	0.107724	-0.0723525	0.2878	0.241007	0.022981	0.311685	0.995222	0.0663444	-0.113656	0.246344	0.470047	0.993301
SL004352	IL-17F	0.127059	-0.0854406	0.33956	0.241231	0.248442	0.248704	0.995222	0.0967658	-0.147935	0.341467	0.438305	0.993301
SL010288	Carbonic anhydrase 6	0.10563	-0.0713067	0.282567	0.241966	0	0.577316	0.995222	0.129332	-0.0507299	0.309394	0.159199	0.960819
SL006694	CNDP1	0.105182	-0.0710335	0.281397	0.242045	0	0.777112	0.995222	0.0677415	-0.111483	0.246966	0.45881	0.993301
SL003739	DcR3	-0.105632	-0.282874	0.0716089	0.242766	0	0.458211	0.995222	-0.13255	-0.31297	0.0478704	0.149886	0.953592
SL010348	FN1.4	-0.127969	-0.342803	0.0868653	0.243017	0.270488	0.241678	0.995222	-0.107382	-0.286936	0.072173	0.241139	0.993301
SL010523	HIPK3	-0.105479	-0.282609	0.0716515	0.243157	0	0.931746	0.995222	-0.10984	-0.290477	0.0707972	0.233342	0.993301
SL005167	Galectin-8	0.219411	-0.149877	0.5887	0.244219	0.731137	0.0537847	0.995222	0.197475	-0.121578	0.516528	0.22509	0.993301
SL004850	IL-17 sR	0.104811	-0.0719304	0.281552	0.245115	0	0.98117	0.995222	0.127713	-0.0523954	0.307822	0.164592	0.968167
SL002640	PlGF	-0.105186	-0.282582	0.0722103	0.245176	0	0.688123	0.995222	-0.101965	-0.282884	0.0789538	0.269322	0.993301
SL005207	NKp46	-0.113328	-0.304609	0.0779518	0.24555	0.111532	0.28873	0.995222	-0.121369	-0.301642	0.0589032	0.186984	0.968167
SL000496	Lactoferrin	-0.104296	-0.281102	0.0725104	0.247616	0	0.849518	0.995222	-0.118281	-0.298554	0.0619928	0.198454	0.992271
SL000406	Eotaxin	0.206546	-0.144841	0.557934	0.249292	0.702889	0.0665654	0.995222	0.23537	-0.0788525	0.549593	0.142071	0.953592
SL004486	VEGF-C	0.103934	-0.0733594	0.281228	0.250563	0	0.727581	0.995222	0.0771064	-0.103526	0.257738	0.402789	0.993301
SL010465	MATN2	-0.179272	-0.486229	0.127685	0.252342	0.625943	0.102039	0.995222	-0.117922	-0.336362	0.100519	0.290029	0.993301
SL003184	sLeptin R	0.102694	-0.0733184	0.278706	0.252817	0	0.872536	0.995222	0.052025	-0.126312	0.230362	0.56748	0.993301
SL011499	PH	0.107481	-0.0767721	0.291734	0.252909	0.0688169	0.300066	0.995222	0.106242	-0.0729805	0.285464	0.245295	0.993301
SL004365	TWEAK	0.150416	-0.107492	0.408325	0.253004	0.47796	0.166347	0.995222	0.171551	-0.0871297	0.430232	0.193668	0.987217
SL003685	PBEF	-0.102727	-0.279272	0.0738183	0.254099	0	0.552108	0.995222	-0.0999021	-0.27984	0.0800359	0.276517	0.993301
SL010509	PAK6	-0.102934	-0.27987	0.074002	0.254192	0	0.834233	0.995222	-0.09178	-0.272143	0.0885827	0.318593	0.993301
SL008094	PGM1	-0.102108	-0.277697	0.0734803	0.254387	0	0.622717	0.995222	-0.109683	-0.288746	0.0693794	0.229922	0.993301
SL011769	AN32B	-0.102678	-0.279776	0.0744189	0.255807	0	0.494327	0.995222	-0.0720887	-0.252452	0.108275	0.433411	0.993301
SL003041	PF-4	0.102033	-0.07452	0.278587	0.257341	0	0.749892	0.995222	0.126141	-0.0537738	0.306056	0.169391	0.968167
SL003863	kallikrein 5	0.131659	-0.0962491	0.359566	0.257534	0.333542	0.220599	0.995222	0.116526	-0.10551	0.338562	0.303666	0.993301
SL008933	PARK7	-0.102274	-0.279565	0.0750174	0.258205	0	0.467171	0.995222	-0.119311	-0.299926	0.0613046	0.195419	0.987217
SL011049	MASP3	0.102001	-0.0748414	0.278844	0.25827	0	0.715264	0.995222	0.0713244	-0.108751	0.2514	0.437569	0.993301
SL008113	ATPO	0.101519	-0.0755367	0.278574	0.261102	0	0.466867	0.995222	0.0589996	-0.121097	0.239096	0.520819	0.993301
SL009089	PGCB	0.128176	-0.0956141	0.351967	0.261619	0.312395	0.227835	0.995222	0.166356	-0.0833049	0.416016	0.19156	0.982465
SL003679	IGF-II receptor	-0.173678	-0.477339	0.129983	0.26229	0.62083	0.104378	0.995222	-0.203773	-0.47138	0.0638348	0.135585	0.953592
SL000586	Thrombin	-0.117078	-0.322427	0.0882706	0.263798	0.211469	0.260108	0.995222	-0.0663125	-0.245411	0.112786	0.468029	0.993301
SL000384	CTLA-4	-0.100568	-0.277152	0.0760163	0.264322	0	0.516326	0.995222	-0.100095	-0.280113	0.0799226	0.275802	0.993301
SL000554	PKC-D	0.100352	-0.0760594	0.276763	0.264881	0	0.833293	0.995222	0.0915855	-0.0882738	0.271445	0.318267	0.993301
SL000343	Cathepsin B	-0.120715	-0.33312	0.0916911	0.265327	0.248943	0.248546	0.995222	-0.137512	-0.345853	0.0708297	0.195791	0.987217
SL004326	TNFSF18	0.100229	-0.0762897	0.276748	0.265757	0	0.677938	0.995222	0.0867911	-0.0931696	0.266752	0.344532	0.993301
SL010378	RET	-0.106367	-0.293812	0.0810781	0.266054	0.0957254	0.292984	0.995222	-0.17981	-0.358411	-0.00120844	0.0484699	0.775319
SL009792	PUR8	0.100113	-0.0764967	0.276723	0.266557	0	0.388775	0.995222	0.0941748	-0.0859327	0.274282	0.305445	0.993301
SL006922	RAD51	0.111452	-0.0853809	0.308285	0.267092	0.153321	0.277135	0.995222	0.121949	-0.0578739	0.301771	0.183791	0.968167
SL004821	S100A4	0.100106	-0.0768522	0.277063	0.267535	0	0.920537	0.995222	0.130526	-0.0497082	0.31076	0.155779	0.953592
SL007356	NOTC2	0.0997615	-0.0775289	0.277052	0.270082	0	0.606903	0.995222	0.103057	-0.0776247	0.283738	0.263601	0.993301
SL012783	WFKN1	-0.0993215	-0.276153	0.0775096	0.270957	0	0.517792	0.995222	-0.109393	-0.289202	0.0704169	0.233103	0.993301
SL005177	IL-1F6	0.0993675	-0.0776811	0.276416	0.271324	0	0.909066	0.995222	0.0921295	-0.0882684	0.272527	0.316848	0.993301
SL006029	Chitotriosidase-1	-0.0992837	-0.276468	0.0779002	0.272095	0	0.564807	0.995222	-0.0851872	-0.265817	0.0954427	0.355308	0.993301
SL012881	GPC6	0.0985266	-0.0781817	0.275235	0.274477	0	0.887144	0.995222	0.0926515	-0.0874262	0.272729	0.313254	0.993301
SL004739	ITI heavy chain H4	-0.0981149	-0.274624	0.0783946	0.275947	0	0.452649	0.995222	-0.0857237	-0.296073	0.124626	0.42444	0.993301
SL007871	Cytidylate kinase	0.0981588	-0.0786396	0.274957	0.276518	0	0.825522	0.995222	0.0819274	-0.098257	0.262112	0.372839	0.993301
SL008059	RS3	0.0976063	-0.0785533	0.273766	0.27749	0	0.481934	0.995222	0.0713463	-0.107816	0.250509	0.435098	0.993301
SL009629	MBD4	-0.0980382	-0.275239	0.0791627	0.278201	0	0.763824	0.995222	-0.0836341	-0.264297	0.0970287	0.364235	0.993301
SL004868	Carbonic anhydrase VII	-0.0929318	-0.261037	0.0751738	0.278585	0	0.637038	0.995222	-0.082646	-0.254025	0.0887327	0.344569	0.993301
SL012774	CREL1	-0.0972388	-0.273293	0.0788155	0.279016	0	0.512105	0.995222	-0.125889	-0.305239	0.053461	0.168904	0.968167
SL017528	RNase H1	-0.0975219	-0.274336	0.0792922	0.279689	0	0.550329	0.995222	-0.0852163	-0.265483	0.0950508	0.354176	0.993301
SL000136	AREG	0.0976239	-0.0794132	0.274661	0.279792	0	0.628274	0.995222	0.103802	-0.0767556	0.28436	0.259836	0.993301
SL003848	Annexin V	-0.13612	-0.383082	0.110842	0.280014	0.423747	0.187729	0.995222	-0.0743453	-0.27025	0.12156	0.456998	0.993301
SL011202	SNAA	0.0972719	-0.0796845	0.274228	0.28131	0	0.643896	0.995222	0.105807	-0.074625	0.286238	0.250416	0.993301
SL004067	GX	0.12271	-0.100794	0.346214	0.281895	0.309165	0.228926	0.995222	0.1819	-0.0248209	0.38862	0.0845939	0.90111
SL001890	GA733-1 protein	-0.0973228	-0.274681	0.0800352	0.282149	0	0.392439	0.995222	-0.0752939	-0.25607	0.105482	0.414311	0.993301
SL004064	GIB	-0.0957546	-0.270521	0.0790117	0.282883	0	0.946756	0.995222	-0.0549457	-0.232698	0.122806	0.544612	0.993301
SL008522	SEM5A	0.131362	-0.110172	0.372895	0.286443	0.402767	0.195672	0.995222	0.0965694	-0.128836	0.321975	0.401077	0.993301
SL004783	S100A12	-0.0961246	-0.272982	0.0807333	0.286755	0	0.463942	0.995222	-0.139422	-0.319301	0.0404574	0.128727	0.953592
SL014094	GP114	-0.0963055	-0.273722	0.0811113	0.28737	0	0.851759	0.995222	-0.0723549	-0.253161	0.108451	0.432841	0.993301
SL000007	ER	0.0960297	-0.0810576	0.273117	0.287856	0	0.344034	0.995222	0.0971477	-0.0834709	0.277766	0.291797	0.993301
SL010530	OCAD1	0.0957124	-0.0808621	0.272287	0.288054	0	0.720679	0.995222	0.0689889	-0.110877	0.248855	0.452197	0.993301
SL010384	Testican-1	-0.095547	-0.271946	0.0808515	0.288407	0	0.3969	0.995222	-0.0224188	-0.20068	0.155842	0.805301	0.997339
SL005764	sCD163	-0.11463	-0.326449	0.0971891	0.288839	0.248204	0.248779	0.995222	-0.170785	-0.397567	0.0559971	0.139942	0.953592
SL004855	contactin-1	0.0948354	-0.0812027	0.270874	0.291026	0	0.610927	0.995222	0.121458	-0.057628	0.300543	0.18376	0.968167
SL000347	CBG	0.168959	-0.145598	0.483516	0.29245	0.654415	0.0889297	0.995222	0.163987	-0.107707	0.435682	0.236818	0.993301
SL006913	FYN	0.128498	-0.11101	0.368006	0.293012	0.39743	0.197663	0.995222	0.126	-0.115709	0.367709	0.30692	0.993301
SL010460	FCG2B	-0.0946984	-0.271779	0.0823825	0.294574	0	0.595956	0.995222	-0.10117	-0.281759	0.0794188	0.272196	0.993301
SL009400	CRDL1	-0.0945053	-0.271233	0.0822228	0.294597	0	0.639648	0.995222	-0.0117003	-0.190063	0.166662	0.897697	0.997339
SL004149	IL-13 Ra1	-0.119336	-0.342659	0.103987	0.294945	0.309406	0.228845	0.995222	-0.0930547	-0.378071	0.191961	0.522232	0.993301
SL004475	IFN-a/b R1	0.0912802	-0.0796871	0.262248	0.295361	0	0.919633	0.995222	0.0725032	-0.101748	0.246754	0.41478	0.993301
SL010373	FCAR	0.0933536	-0.0815575	0.268265	0.295528	0	0.540757	0.995222	0.0690945	-0.109075	0.247264	0.447207	0.993301
SL000601	Transferrin	-0.107346	-0.30902	0.0943278	0.296837	0.179543	0.26959	0.995222	-0.0676534	-0.333944	0.198637	0.618522	0.993301
SL005194	JAM-C	0.0942795	-0.0829369	0.271496	0.297085	0	0.573431	0.995222	0.108431	-0.0722578	0.28912	0.239526	0.993301
SL004751	HO-2	-0.0930107	-0.268534	0.0825127	0.298993	0	0.422029	0.995222	-0.114171	-0.292936	0.0645942	0.210657	0.993301
SL004126	4-1BB	0.0939278	-0.0834812	0.271337	0.299415	0	0.834816	0.995222	0.106245	-0.0745578	0.287049	0.24943	0.993301
SL000089	TGF-b3	-0.0929009	-0.268589	0.0827872	0.300018	0	0.530855	0.995222	-0.110953	-0.290054	0.0681476	0.224672	0.993301
SL001729	G-CSF	0.0937078	-0.0836919	0.271107	0.300524	0	0.735262	0.995222	0.103569	-0.0772983	0.284437	0.261724	0.993301
SL004469	amyloid precursor protein	-0.0929104	-0.269884	0.0840634	0.303493	0	0.413932	0.995222	-0.0986703	-0.279164	0.0818229	0.283965	0.993301
SL000622	Coagulation Factor V	0.173885	-0.15736	0.505129	0.30354	0.677271	0.0783607	0.995222	0.173514	-0.13202	0.479047	0.265678	0.993301
SL008904	LYVE1	-0.0929334	-0.270083	0.0842161	0.303853	0	0.56087	0.995222	-0.144826	-0.324795	0.0351431	0.114741	0.953592
SL010449	Carbonic Anhydrase X	0.0866182	-0.0786457	0.251882	0.304299	0	0.652345	0.995222	0.0546412	-0.113378	0.22266	0.523866	0.993301
SL002036	FGFR4	-0.0928963	-0.270164	0.0843714	0.304369	0	0.650855	0.995222	-0.0714121	-0.252099	0.109275	0.43856	0.993301
SL010500	LYNB	0.143907	-0.131087	0.418901	0.30505	0.531951	0.143827	0.995222	0.174456	-0.0820688	0.43098	0.182558	0.968167
SL006372	YES	-0.0925033	-0.269409	0.0844026	0.305431	0	0.542862	0.995222	-0.171578	-0.350251	0.00709372	0.0598158	0.775319
SL004827	S100A6	0.122203	-0.11179	0.356196	0.306027	0.363373	0.210094	0.995222	0.132372	-0.114015	0.378759	0.292342	0.993301
SL004580	Macrophage scavenger receptor	-0.0924335	-0.269452	0.0845854	0.306105	0	0.412977	0.995222	-0.101493	-0.281939	0.0789534	0.270292	0.993301
SL003793	MEK1	-0.0926237	-0.270028	0.0847805	0.306162	0	0.533967	0.995222	-0.123799	-0.304311	0.0567132	0.178889	0.968167
SL016128	TXD12	-0.0922179	-0.269077	0.0846409	0.306797	0	0.84217	0.995222	-0.06016	-0.240169	0.119849	0.512447	0.993301
SL003178	sICAM-3	0.0928197	-0.0859485	0.271588	0.308845	0.0135781	0.314003	0.995222	0.0913403	-0.13328	0.315961	0.425447	0.993301
SL000138	HB-EGF	-0.0921463	-0.269746	0.0854535	0.309195	0	0.579487	0.995222	-0.0716865	-0.252716	0.109343	0.437671	0.993301
SL000017	vWF	-0.126326	-0.370107	0.117455	0.3098	0.413193	0.191748	0.995222	-0.153669	-0.407758	0.100421	0.235879	0.993301
SL007242	MP2K3	0.0913454	-0.0854765	0.268167	0.311295	0	0.737647	0.995222	0.112428	-0.0675804	0.292436	0.220901	0.993301
SL011549	ARI3A	-0.0908603	-0.267409	0.0856887	0.313124	0	0.681425	0.995222	-0.094988	-0.275052	0.0850756	0.301169	0.993301
SL011069	Marapsin	0.0910114	-0.0859088	0.267932	0.313336	0	0.939493	0.995222	0.0865464	-0.0938703	0.266963	0.347115	0.993301
SL004636	Flt-3	0.0904061	-0.0861503	0.266962	0.31557	0	0.569941	0.995222	0.0614726	-0.118378	0.241324	0.502914	0.993301
SL010471	Testican-2	0.0905777	-0.0864379	0.267593	0.315909	0	0.454296	0.995222	0.0879438	-0.0925973	0.268485	0.339718	0.993301
SL006480	TRY3	0.0903738	-0.0868003	0.267548	0.317433	0	0.686477	0.995222	0.0901263	-0.0902956	0.270548	0.327549	0.993301
SL000401	Elastase	-0.0897279	-0.266733	0.0872769	0.320441	0	0.905703	0.995222	-0.0861873	-0.266717	0.094342	0.34942	0.993301
SL004795	ERAB	-0.0836699	-0.248794	0.0814545	0.320647	0	0.783851	0.995222	-0.127725	-0.295392	0.0399413	0.13542	0.953592
SL003300	HCC-4	-0.0892347	-0.266248	0.0877787	0.323132	0	0.56095	0.995222	-0.049951	-0.230089	0.130187	0.586796	0.993301
SL000300	b-Endorphin	-0.0887306	-0.264943	0.0874823	0.32368	0	0.985502	0.995222	-0.0791974	-0.258881	0.100486	0.387657	0.993301
SL004097	SMAD3	0.0888034	-0.0882069	0.265814	0.325468	0	0.336705	0.995222	0.0332578	-0.146439	0.212955	0.716796	0.993301
SL001797	Kallikrein 6	0.0883061	-0.0879675	0.26458	0.326167	0	0.631457	0.995222	0.0592784	-0.120286	0.238842	0.517612	0.993301
SL006917	LYN	0.182051	-0.182558	0.54666	0.327769	0.728935	0.0547676	0.995222	0.195152	-0.163721	0.554025	0.286508	0.993301
SL004605	40S ribosomal protein SA	-0.0881729	-0.265215	0.0888689	0.329	0	0.828108	0.995222	-0.0684029	-0.248876	0.112071	0.457565	0.993301
SL006091	NCK1	-0.0872731	-0.262987	0.0884412	0.330321	0	0.861338	0.995222	-0.0980246	-0.277156	0.0811069	0.28348	0.993301
SL017289	PolyUbiquitin K48	0.0878851	-0.0892155	0.264986	0.330742	0	0.463752	0.995222	0.0895982	-0.091035	0.270232	0.330958	0.993301
SL008071	14-3-3 protein theta	0.087571	-0.0891476	0.26429	0.331429	0	0.79421	0.995222	0.091468	-0.0887626	0.271699	0.319886	0.993301
SL009791	hnRNP A/B	0.0874144	-0.0890458	0.263874	0.331587	0	0.758001	0.995222	0.0565797	-0.123141	0.2363	0.537211	0.993301
SL010381	Soggy-1	0.0876387	-0.0893475	0.264625	0.331787	0	0.805807	0.995222	0.0815194	-0.0989503	0.261989	0.375979	0.993301
SL014292	SIG14	-0.0869695	-0.263321	0.0893825	0.333758	0	0.905106	0.995222	-0.0507955	-0.229879	0.128288	0.578261	0.993301
SL004343	Flt3 ligand	-0.0869336	-0.263412	0.0895444	0.334302	0	0.90049	0.995222	-0.0957776	-0.275726	0.0841706	0.296859	0.993301
SL001791	Osteocalcin	0.0863707	-0.0892527	0.261994	0.335096	0	0.563464	0.995222	0.0704082	-0.108632	0.249448	0.440847	0.993301
SL007358	KPCT	0.136283	-0.141645	0.414211	0.336514	0.532792	0.143467	0.995222	0.080347	-0.0997554	0.260449	0.381913	0.993301
SL003166	ALCAM	-0.16895	-0.513951	0.17605	0.337149	0.701173	0.0673516	0.995222	-0.238994	-0.588432	0.110445	0.180086	0.968167
SL003735	4-1BB ligand	-0.0868307	-0.264271	0.0906097	0.337503	0	0.911436	0.995222	-0.0657838	-0.246651	0.115084	0.475929	0.993301
SL002075	IFN-aA	0.0865144	-0.0904704	0.263499	0.338024	0	0.567985	0.995222	0.0683542	-0.111872	0.248581	0.457268	0.993301
SL004269	ghrelin	0.187277	-0.196268	0.570822	0.338563	0.759854	0.0412884	0.995222	0.222916	-0.185204	0.631036	0.284379	0.993301
SL004128	Activin RIB	-0.0864423	-0.263508	0.0906232	0.338647	0	0.789609	0.995222	-0.0887911	-0.268769	0.0911865	0.333575	0.993301
SL000493	LDH-H 1	-0.0859546	-0.262529	0.0906201	0.340039	0	0.627226	0.995222	-0.0536984	-0.233524	0.126127	0.558364	0.993301
SL004148	IL-12 Rb1	0.274406	-0.290105	0.838918	0.340727	0.884005	0.00332293	0.995222	0.296842	-0.313536	0.90722	0.340499	0.993301
SL004643	Angiopoietin-4	0.0859557	-0.091076	0.262987	0.341281	0	0.813362	0.995222	0.0774269	-0.103111	0.257965	0.400592	0.993301
SL010349	FN1.3	-0.123204	-0.377294	0.130886	0.341933	0.455932	0.175185	0.995222	-0.0796123	-0.259383	0.100158	0.385406	0.993301
SL003761	pTEN	-0.0844443	-0.258713	0.0898247	0.342252	0	0.508923	0.995222	-0.111535	-0.289066	0.0659948	0.218185	0.993301
SL000052	Troponin T	0.0854932	-0.0910116	0.261998	0.342446	0	0.502961	0.995222	0.0613027	-0.118452	0.241057	0.503867	0.993301
SL009768	CBX5	0.0856555	-0.0913722	0.262683	0.342959	0	0.474253	0.995222	0.0818148	-0.0987434	0.262373	0.374486	0.993301
SL002655	CTGF	0.0855989	-0.0916965	0.262894	0.344006	0	0.582859	0.995222	0.116879	-0.0636983	0.297457	0.204587	0.993301
SL000323	C7	0.085286	-0.0915193	0.262091	0.344438	0	0.77219	0.995222	0.0185263	-0.160579	0.197632	0.839342	0.997339
SL020171	HHLA2	0.0852537	-0.0917178	0.262225	0.345074	0	0.647755	0.995222	0.112288	-0.0679448	0.29252	0.222053	0.993301
SL000582	Survivin	0.0851297	-0.0916066	0.261866	0.345135	0	0.559352	0.995222	0.0622538	-0.117857	0.242365	0.498123	0.993301
SL004686	TNFSF15	-0.117193	-0.360728	0.126343	0.345598	0.407792	0.193786	0.995222	-0.153018	-0.406594	0.100557	0.236918	0.993301
SL002071	Gastrin-releasing peptide	-0.0839416	-0.259283	0.0913998	0.348091	0	0.776904	0.995222	-0.0850329	-0.26384	0.093774	0.351298	0.993301
SL001995	Angiopoietin-1	0.0841201	-0.0921751	0.260415	0.349682	0	0.648501	0.995222	0.0654048	-0.11393	0.244739	0.474724	0.993301
SL004131	B7-2	0.0832542	-0.0920107	0.258519	0.351843	0	0.567295	0.995222	0.0882323	-0.0904937	0.266958	0.333253	0.993301
SL016566	DRAK2	0.0838551	-0.0928915	0.260602	0.352434	0	0.657972	0.995222	0.0586529	-0.121382	0.238688	0.52313	0.993301
SL000528	NADPH-P450 Oxidoreductase	0.0837136	-0.0929583	0.260385	0.353043	0	0.851882	0.995222	0.00264291	-0.175852	0.181138	0.976848	0.997339
SL005225	TrkA	-0.0827873	-0.258251	0.0926766	0.355096	0	0.566109	0.995222	-0.115559	-0.29414	0.0630211	0.204694	0.993301
SL009045	ENPP7	-0.0832889	-0.259838	0.0932605	0.355157	0	0.912543	0.995222	-0.18441	-0.361768	-0.00705241	0.04156	0.741257
SL000556	PKC-G	-0.0833375	-0.260263	0.0935882	0.355901	0	0.619893	0.995222	-0.0409912	-0.220991	0.139009	0.655351	0.993301
SL016549	AMPK a2b2g1	-0.0832658	-0.260387	0.0938552	0.356846	0	0.458089	0.995222	-0.0906545	-0.271288	0.0899787	0.325288	0.993301
SL000377	CK-BB	-0.0833121	-0.26062	0.0939958	0.357085	0	0.940484	0.995222	-0.0889774	-0.269684	0.091729	0.334515	0.993301
SL004356	LAG-1	-0.132596	-0.415098	0.149905	0.357606	0.552986	0.134736	0.995222	-0.123606	-0.340605	0.0933927	0.264239	0.993301
SL008378	4EBP2	-0.0825609	-0.258518	0.0933964	0.357764	0	0.353997	0.995222	-0.0839851	-0.263435	0.0954648	0.35899	0.993301
SL000131	PCNA	-0.082504	-0.25989	0.0948819	0.361979	0	0.447549	0.995222	-0.0779737	-0.275754	0.119806	0.439696	0.993301
SL010502	MK08	0.17151	-0.19744	0.54046	0.362239	0.738118	0.0506892	0.995222	0.158176	-0.159439	0.475792	0.329022	0.993301
SL000039	IL-8	-0.082084	-0.258744	0.0945763	0.362462	0	0.420692	0.995222	-0.121999	-0.301726	0.0577281	0.183378	0.968167
SL000427	Fractalkine/CX3CL-1	-0.0818742	-0.258089	0.0943405	0.362478	0	0.474134	0.995222	-0.0959359	-0.275501	0.0836292	0.295032	0.993301
SL012108	PLCG1	0.0799136	-0.0926695	0.252497	0.364116	0	0.800281	0.995222	0.0579527	-0.117915	0.23382	0.518372	0.993301
SL004698	HPV E7 Type18	0.0815698	-0.094824	0.257964	0.364753	0	0.823392	0.995222	0.0615263	-0.118256	0.241308	0.502378	0.993301
SL005250	Chymase	-0.0816364	-0.25818	0.0949077	0.36477	0	0.867854	0.995222	-0.0853177	-0.265379	0.0947435	0.353054	0.993301
SL007025	JAK2	-0.143985	-0.456131	0.16816	0.36595	0.631283	0.0995895	0.995222	-0.0821111	-0.379001	0.214779	0.587771	0.993301
SL005352	FABPE	0.105054	-0.12334	0.333449	0.36731	0.332801	0.220855	0.995222	0.113641	-0.123542	0.350825	0.347693	0.993301
SL004932	Peroxiredoxin-5	0.0813684	-0.0957247	0.258462	0.367834	0	0.796755	0.995222	0.0822436	-0.098355	0.262842	0.372095	0.993301
SL011508	PACAP-27	-0.0802665	-0.255146	0.0946125	0.368338	0	0.760915	0.995222	-0.0768417	-0.255078	0.101395	0.398119	0.993301
SL005195	LAG-3	-0.0809641	-0.2574	0.0954717	0.368439	0	0.395328	0.995222	-0.079212	-0.259999	0.101575	0.390473	0.993301
SL007953	PDXK	-0.0806269	-0.257619	0.096365	0.371942	0	0.8397	0.995222	-0.0858457	-0.266265	0.0945735	0.351039	0.993301
SL017424	GI24	0.117791	-0.142225	0.377808	0.374598	0.481645	0.164848	0.995222	0.122274	-0.200377	0.444925	0.457626	0.993301
SL000104	Bcl-2	0.0793464	-0.0962113	0.254904	0.375704	0	0.89494	0.995222	0.0832457	-0.0957953	0.262287	0.362142	0.993301
SL014028	ENTP5	0.0797282	-0.0969034	0.25636	0.376323	0	0.842663	0.995222	0.125099	-0.054514	0.304712	0.172222	0.968167
SL005159	EPO-R	-0.0800867	-0.25757	0.0973969	0.376479	0	0.77876	0.995222	-0.086896	-0.267908	0.0941164	0.346761	0.993301
SL011510	Somatostatin-28	-0.079762	-0.257028	0.097504	0.377832	0	0.924531	0.995222	-0.0746445	-0.255362	0.106073	0.418196	0.993301
SL007640	CLC7A	-0.0795837	-0.256589	0.0974219	0.378198	0	0.56372	0.995222	-0.0814809	-0.262005	0.099043	0.376348	0.993301
SL008835	ASGR1	-0.0793765	-0.256143	0.0973897	0.378795	0	0.396117	0.995222	-0.103767	-0.283899	0.0763651	0.258874	0.993301
SL005190	ILT-2	-0.115357	-0.372298	0.141583	0.378884	0.466788	0.170855	0.995222	-0.138413	-0.490176	0.213349	0.440579	0.993301
SL012517	RSPO4	-0.0793717	-0.256212	0.097469	0.379025	0	0.483335	0.995222	-0.0386792	-0.218419	0.141061	0.67319	0.993301
SL014289	KI3S1	-0.0788676	-0.255462	0.0977271	0.381397	0	0.819294	0.995222	-0.0973122	-0.277068	0.0824431	0.28867	0.993301
SL008936	CHL1	0.172823	-0.214957	0.560603	0.38239	0.759676	0.0413636	0.995222	0.202112	-0.187689	0.591914	0.309513	0.993301
SL000454	HSP 90b	-0.0788764	-0.25589	0.0981373	0.382472	0	0.618763	0.995222	-0.153068	-0.332197	0.0260608	0.0939702	0.94365
SL008085	3HIDH	-0.0788205	-0.255843	0.0982016	0.382832	0	0.859835	0.995222	-0.0604665	-0.240905	0.119972	0.511309	0.993301
SL008931	CD177	-0.0927862	-0.301706	0.116134	0.384046	0.230359	0.25434	0.995222	-0.0914102	-0.321773	0.138953	0.436726	0.993301
SL011629	AIP	0.0783879	-0.0984686	0.255244	0.385004	0	0.898498	0.995222	0.0616075	-0.118666	0.241881	0.50298	0.993301
SL012707	PCSK9	-0.114824	-0.37419	0.144542	0.385561	0.471127	0.16911	0.995222	-0.115576	-0.394449	0.163298	0.416629	0.993301
SL008504	GNS	0.0833068	-0.10609	0.272704	0.388634	0.0945013	0.29331	0.995222	0.0492413	-0.136039	0.234521	0.602441	0.993301
SL000158	PSMA	0.0773144	-0.0987239	0.253353	0.389349	0	0.510431	0.995222	0.0368185	-0.142282	0.215919	0.687008	0.993301
SL000338	Calpastatin	0.0775981	-0.0992091	0.254405	0.389679	0	0.8694	0.995222	0.134413	-0.0449059	0.313732	0.141795	0.953592
SL010451	CFC1	0.0770664	-0.0991511	0.253284	0.391354	0	0.832889	0.995222	0.0808152	-0.0985963	0.260227	0.377313	0.993301
SL000592	TIMP-2	-0.0771025	-0.253722	0.099517	0.392211	0	0.92075	0.995222	-0.0424087	-0.222237	0.13742	0.643927	0.993301
SL008588	SLAF5	-0.0768898	-0.25342	0.0996403	0.393279	0	0.644386	0.995222	-0.075538	-0.255586	0.10451	0.410912	0.993301
SL000137	BTC	0.132299	-0.171647	0.436244	0.393595	0.611945	0.10843	0.995222	0.0948631	-0.158856	0.348582	0.463673	0.993301
SL004859	GITR	0.0771165	-0.100116	0.254349	0.393766	0	0.939043	0.995222	0.0659802	-0.114505	0.246465	0.473678	0.993301
SL003310	VEGF121	-0.0769206	-0.253918	0.100077	0.394341	0	0.571159	0.995222	-0.105232	-0.285538	0.0750747	0.25267	0.993301
SL000670	GSTA3	-0.0763229	-0.252306	0.0996599	0.39531	0	0.708674	0.995222	-0.0538339	-0.233158	0.12549	0.556271	0.993301
SL003060	bFGF-R	-0.0763917	-0.252771	0.0999871	0.395946	0	0.423839	0.995222	-0.0409495	-0.220513	0.138614	0.654896	0.993301
SL004332	EG-VEGF	-0.0767874	-0.25435	0.100775	0.396665	0	0.87172	0.995222	-0.0834807	-0.264574	0.0976124	0.366256	0.993301
SL000442	HGH	-0.0763291	-0.252891	0.100233	0.396824	0	0.476153	0.995222	-0.109656	-0.289435	0.0701224	0.231898	0.993301
SL010470	Semaphorin 3E	-0.121465	-0.402577	0.159648	0.397065	0.543148	0.139009	0.995222	-0.124104	-0.379818	0.13161	0.341493	0.993301
SL005491	OBCAM	0.0763764	-0.100484	0.253236	0.397328	0	0.661456	0.995222	0.0691814	-0.111139	0.249502	0.452078	0.993301
SL000047	IGF-I	0.134942	-0.178603	0.448486	0.398938	0.637214	0.0968633	0.995222	0.12523	-0.202812	0.453272	0.45433	0.993301
SL003711	Caspase-3	0.0758744	-0.100992	0.252741	0.400455	0	0.444298	0.995222	0.0955099	-0.0845951	0.275615	0.298632	0.993301
SL004726	CD97	0.0817605	-0.10924	0.272761	0.401476	0.179393	0.269634	0.995222	0.0650341	-0.151626	0.281694	0.556321	0.993301
SL004556	DAF	-0.162672	-0.542842	0.217499	0.401664	0.748902	0.0459751	0.995222	-0.100166	-0.390749	0.190417	0.499287	0.993301
SL004438	Cystatin M	-0.159397	-0.531937	0.213143	0.401694	0.736184	0.0515436	0.995222	-0.0751353	-0.373656	0.223385	0.621795	0.993301
SL005164	Galectin-2	-0.0755709	-0.252877	0.101736	0.40351	0	0.999583	0.995222	-0.0757855	-0.256472	0.104901	0.411037	0.993301
SL006910	Cathepsin V	0.107169	-0.144492	0.358829	0.403918	0.442307	0.180549	0.995222	0.0539449	-0.183056	0.290945	0.655512	0.993301
SL003930	HPG-	0.0752537	-0.101468	0.251975	0.403934	0	0.770973	0.995222	0.0927264	-0.0872885	0.272741	0.312694	0.993301
SL010619	TPSG1	0.0717874	-0.0975687	0.241144	0.406088	0	0.662403	0.995222	0.0698902	-0.102779	0.242559	0.427589	0.993301
SL010524	WNK3	0.0748507	-0.10215	0.251852	0.407197	0	0.77947	0.995222	0.0644203	-0.116075	0.244916	0.484223	0.993301
SL001728	PDGFRA	0.0748028	-0.102137	0.251743	0.407335	0	0.977342	0.995222	0.112244	-0.0678501	0.292337	0.221878	0.993301
SL010469	RGM-C	-0.18614	-0.626753	0.254472	0.407669	0.814264	0.0203225	0.995222	-0.147059	-0.516928	0.22281	0.435817	0.993301
SL004159	TRAIL R4	0.0747644	-0.10237	0.251898	0.408091	0	0.401937	0.995222	0.0217379	-0.158192	0.201668	0.81282	0.997339
SL002086	Ficolin-3	0.0747525	-0.102459	0.251964	0.40837	0	0.824933	0.995222	0.0540184	-0.126616	0.234653	0.557793	0.993301
SL005228	ULBP-2	0.0747555	-0.102513	0.252024	0.408503	0	0.564213	0.995222	0.0809776	-0.0998039	0.261759	0.379983	0.993301
SL004327	BAFF	-0.0964687	-0.325307	0.132369	0.408668	0.339568	0.218505	0.995222	-0.134606	-0.46467	0.195458	0.424111	0.993301
SL001902	BCAM	-0.177557	-0.599434	0.244321	0.409431	0.794062	0.027553	0.995222	-0.209957	-0.608744	0.18883	0.30212	0.993301
SL012248	FAK1	-0.0744583	-0.251737	0.102821	0.410396	0	0.626836	0.995222	-0.0750286	-0.255824	0.105767	0.416007	0.993301
SL018587	ISLR2	0.111941	-0.155539	0.37942	0.412074	0.500816	0.15696	0.995222	0.0430869	-0.214184	0.300358	0.742724	0.997339
SL011211	IF4G2	0.0873116	-0.121349	0.295973	0.412146	0.293182	0.234263	0.995222	0.0974813	-0.0767742	0.271737	0.272888	0.993301
SL004765	MAPKAPK3	-0.0737186	-0.250258	0.102821	0.41311	0	0.918614	0.995222	-0.0244896	-0.203904	0.154925	0.789061	0.997339
SL009202	JAML1	-0.0934684	-0.317761	0.130824	0.414062	0.325015	0.223538	0.995222	-0.111722	-0.411103	0.187658	0.464525	0.993301
SL000306	BNP-32	0.0768591	-0.10764	0.261358	0.414222	0.0617472	0.301894	0.995222	0.0485573	-0.131552	0.228666	0.597218	0.993301
SL000508	Lymphotoxin a2/b1	-0.149438	-0.509089	0.210213	0.415426	0.715496	0.0608197	0.995222	-0.135386	-0.493129	0.222357	0.458246	0.993301
SL004899	HSP70 protein 8	-0.0734243	-0.250449	0.103601	0.416258	0	0.69103	0.995222	-0.101752	-0.282092	0.0785877	0.268787	0.993301
SL003726	Chk2	-0.0734727	-0.250622	0.103677	0.416278	0	0.640867	0.995222	-0.0600767	-0.240714	0.12056	0.514498	0.993301
SL004820	Phosphoglycerate mutase 1	-0.0732492	-0.250163	0.103665	0.417078	0	0.388239	0.995222	-0.0772176	-0.257533	0.103098	0.401285	0.993301
SL003303	CCL28	0.0729596	-0.103569	0.249488	0.417908	0	0.612286	0.995222	0.0876164	-0.0922435	0.267476	0.339694	0.993301
SL004843	Ephrin-A2	-0.13188	-0.451583	0.187823	0.418804	0.648872	0.0914895	0.995222	-0.118678	-0.392184	0.154827	0.395071	0.993301
SL003728	cIAP-2	0.0728371	-0.103905	0.24958	0.419253	0	0.718097	0.995222	0.065548	-0.11467	0.245766	0.475928	0.993301
SL008176	PSME1	0.072409	-0.103632	0.24845	0.420145	0	0.731988	0.995222	0.099727	-0.079501	0.278955	0.275461	0.993301
SL007266	PSD7	0.0729005	-0.104595	0.250396	0.420824	0	0.388755	0.995222	0.102758	-0.0780296	0.283546	0.265268	0.993301
SL016548	AMPK a1b1g1	0.0720163	-0.103719	0.247751	0.421863	0	0.778771	0.995222	0.078792	-0.100413	0.257997	0.388825	0.993301
SL000474	IL-16	-0.0725149	-0.249882	0.104852	0.42295	0	0.988625	0.995222	-0.0793914	-0.260113	0.10133	0.389229	0.993301
SL003066	PEDF	-0.120918	-0.416878	0.175043	0.423269	0.601128	0.113337	0.995222	-0.134612	-0.392553	0.123329	0.306379	0.993301
SL003173	Gro-a	0.0802999	-0.116724	0.277324	0.4244	0.153101	0.277197	0.995222	0.0599647	-0.144165	0.264095	0.564782	0.993301
SL001897	SPINT2	0.0720752	-0.104897	0.249048	0.424737	0	0.603649	0.995222	0.0452716	-0.134865	0.225408	0.622312	0.993301
SL014111	KIRR3	0.0717265	-0.105622	0.249075	0.427962	0	0.408201	0.995222	0.0998033	-0.0808755	0.280482	0.278966	0.993301
SL008143	UBE2N	0.101221	-0.150178	0.352619	0.430029	0.443534	0.180069	0.995222	0.102409	-0.133751	0.338569	0.395367	0.993301
SL003849	FGF9	-0.0713915	-0.248789	0.106006	0.430249	0	0.843585	0.995222	-0.0799635	-0.260796	0.100869	0.386112	0.993301
SL004864	Cadherin-12	-0.071338	-0.248722	0.106046	0.430561	0	0.582734	0.995222	-0.0681067	-0.249028	0.112815	0.460626	0.993301
SL011533	SGTA	0.0711186	-0.10595	0.248187	0.431159	0	0.498594	0.995222	0.0662593	-0.114275	0.246794	0.471931	0.993301
SL004253	17-beta-HSD 1	0.0708838	-0.106095	0.247863	0.432451	0	0.353866	0.995222	0.060667	-0.119806	0.24114	0.50999	0.993301
SL013489	AMNLS	0.0709781	-0.106335	0.248292	0.432707	0	0.399997	0.995222	0.0870566	-0.0937119	0.267825	0.34522	0.993301
SL008591	TFF1	0.0706072	-0.105992	0.247206	0.433259	0	0.952519	0.995222	0.0935003	-0.0864773	0.273478	0.308572	0.993301
SL005152	TIG2	-0.0703525	-0.246983	0.106278	0.435002	0	0.479078	0.995222	-0.0192112	-0.198506	0.160083	0.833662	0.997339
SL000428	FSH	-0.0703027	-0.246904	0.106298	0.435251	0	0.678048	0.995222	-0.0341324	-0.213786	0.145521	0.709614	0.993301
SL003193	6Ckine	-0.070342	-0.24715	0.106466	0.435531	0	0.474718	0.995222	-0.0627512	-0.243067	0.117565	0.495188	0.993301
SL000460	IgD	-0.130413	-0.458342	0.197516	0.435714	0.663073	0.0849267	0.995222	-0.132612	-0.404337	0.139113	0.3388	0.993301
SL007806	IL22RA1	-0.0705481	-0.24795	0.106854	0.43573	0	0.357103	0.995222	-0.1095	-0.307196	0.0881959	0.277662	0.993301
SL004862	PD-L2	0.189677	-0.289861	0.669214	0.438194	0.841487	0.0120152	0.995222	0.232289	-0.18103	0.645608	0.270672	0.993301
SL004676	IGFBP-5	0.134779	-0.206096	0.475653	0.438369	0.68811	0.0733571	0.995222	0.185483	-0.236702	0.607667	0.389188	0.993301
SL004891	hnRNP A2/B1	-0.0696786	-0.246495	0.107138	0.439896	0	0.490628	0.995222	-0.09626	-0.276398	0.0838784	0.294943	0.993301
SL000308	C1-Esterase Inhibitor	-0.0788727	-0.27947	0.121724	0.440922	0.172797	0.271552	0.995222	-0.00995553	-0.189717	0.169806	0.913562	0.997339
SL007327	OLR1	-0.0694219	-0.246258	0.107414	0.441633	0	0.857788	0.995222	-0.0660116	-0.246363	0.11434	0.47314	0.993301
SL008967	SHPS1	-0.0690678	-0.245554	0.107419	0.443064	0	0.499049	0.995222	-0.0771673	-0.257139	0.102805	0.400695	0.993301
SL000545	Prekallikrein	0.129747	-0.202175	0.46167	0.443591	0.671099	0.0812144	0.995222	0.0614422	-0.318912	0.441796	0.751539	0.997339
SL003440	PAFAH	-0.0691078	-0.245994	0.107778	0.443831	0	0.823891	0.995222	-0.104455	-0.284546	0.0756347	0.255616	0.993301
SL006528	SEPR	-0.0870694	-0.313907	0.139768	0.451863	0.340743	0.218096	0.995222	-0.0707221	-0.249938	0.108494	0.439263	0.993301
SL018256	CHKB	0.0679145	-0.109132	0.244961	0.452149	0	0.98776	0.995222	0.0366442	-0.143558	0.216846	0.690217	0.993301
SL004298	granzyme A	-0.0670386	-0.243396	0.109319	0.456249	0	0.94505	0.995222	-0.11243	-0.291766	0.0669059	0.219166	0.993301
SL010616	SHP-2	0.0669615	-0.110066	0.243989	0.458471	0	0.40568	0.995222	0.0435345	-0.136839	0.223908	0.636176	0.993301
SL013570	DYRK3	0.0667378	-0.110044	0.24352	0.459351	0	0.654886	0.995222	0.0341875	-0.145771	0.214146	0.709638	0.993301
SL010510	PAK7	0.107108	-0.176954	0.39117	0.459895	0.552321	0.135026	0.995222	0.111406	-0.163434	0.386245	0.426923	0.993301
SL004154	NCAM-L1	-0.214159	-0.784314	0.355996	0.461614	0.888621	0.00273196	0.995222	-0.264423	-0.807022	0.278176	0.339506	0.993301
SL004861	IL-18 Rb	-0.0664228	-0.243291	0.110445	0.461691	0	0.970498	0.995222	-0.0650587	-0.245448	0.115331	0.479645	0.993301
SL010493	CAMK2D	0.162238	-0.270122	0.594598	0.462064	0.804149	0.0238443	0.995222	0.125941	-0.286406	0.538289	0.549425	0.993301
SL004350	IL-17B	0.168744	-0.281965	0.619453	0.463068	0.821737	0.0178615	0.995222	0.170062	-0.268984	0.609107	0.447745	0.993301
SL014048	CONA1	-0.0950447	-0.349617	0.159527	0.464318	0.448188	0.178243	0.995222	-0.107917	-0.366042	0.150208	0.412546	0.993301
SL007453	MK11	0.101263	-0.170861	0.373387	0.465791	0.513833	0.151517	0.995222	0.103754	-0.172048	0.379556	0.460929	0.993301
SL004812	Triosephosphate isomerase	0.0658025	-0.11124	0.242845	0.466325	0	0.319577	0.995222	0.0557684	-0.124678	0.236215	0.544686	0.993301
SL006805	MRCKB	0.0656257	-0.110945	0.242196	0.466334	0	0.450505	0.995222	0.0378966	-0.141963	0.217756	0.679632	0.993301
SL014108	LRRT3	-0.0653438	-0.241517	0.11083	0.467249	0	0.574658	0.995222	-0.0423123	-0.221853	0.137228	0.64415	0.993301
SL014735	IMDH1	-0.0655296	-0.242442	0.111383	0.467848	0	0.88313	0.995222	-0.0964758	-0.27666	0.0837079	0.293983	0.993301
SL010462	FCN1	-0.0779115	-0.288665	0.132842	0.468721	0.245083	0.249759	0.995222	-0.0751888	-0.3492	0.198822	0.590704	0.993301
SL014130	CHST6	-0.0649965	-0.240826	0.110833	0.468751	0	0.928866	0.995222	-0.049969	-0.229241	0.129303	0.584856	0.993301
SL005233	XEDAR	0.130262	-0.222247	0.48277	0.468906	0.718	0.0596858	0.995222	0.152366	-0.2369	0.541632	0.442982	0.993301
SL002706	CD23	-0.183107	-0.679295	0.31308	0.469507	0.851492	0.00946121	0.995222	-0.170263	-0.658221	0.317694	0.494043	0.993301
SL006542	FCN2	0.065203	-0.111642	0.242048	0.4699	0	0.473357	0.995222	0.0552375	-0.125079	0.235554	0.548235	0.993301
SL006629	SIRT2	0.074159	-0.12778	0.276098	0.471669	0.211563	0.26008	0.995222	0.070833	-0.150417	0.292083	0.530344	0.993301
SL007324	CSK21	0.0651456	-0.112256	0.242547	0.471686	0	0.853631	0.995222	0.0408159	-0.139343	0.220975	0.657014	0.993301
SL003349	HIF-1a	0.10107	-0.174778	0.376919	0.472679	0.531598	0.143978	0.995222	0.0665458	-0.200802	0.333894	0.625651	0.993301
SL000557	PKC-Z	0.0691627	-0.120449	0.258774	0.47466	0.0933728	0.293611	0.995222	0.049698	-0.134112	0.233508	0.59616	0.993301
SL003803	ERBB4	0.109739	-0.191623	0.411101	0.475408	0.598143	0.114685	0.995222	0.110016	-0.17829	0.398323	0.454513	0.993301
SL004511	BPI	-0.0643754	-0.241376	0.112625	0.475943	0	0.904851	0.995222	-0.0880901	-0.26844	0.0922597	0.338403	0.993301
SL000396	Cytochrome c	-0.0641229	-0.240953	0.112707	0.477251	0	0.589504	0.995222	0.0119906	-0.166769	0.19075	0.895405	0.997339
SL012538	ARMEL	-0.0637159	-0.239799	0.112367	0.47819	0	0.333246	0.995222	0.0272264	-0.150153	0.204605	0.763536	0.997339
SL010517	STK16	0.063889	-0.112702	0.24048	0.478264	0	0.818378	0.995222	0.0621561	-0.117949	0.242261	0.498785	0.993301
SL006698	transcription factor MLR1, isoform CRA_b	0.0636334	-0.112808	0.240075	0.479655	0	0.350712	0.995222	0.0784887	-0.101402	0.25838	0.392464	0.993301
SL001795	IL-1b	-0.0917781	-0.346345	0.162789	0.479804	0.457115	0.174716	0.995222	-0.127056	-0.357191	0.103078	0.279213	0.993301
SL007153	PERL	0.0634515	-0.112579	0.239482	0.479887	0	0.395569	0.995222	-0.0755124	-0.264492	0.113468	0.433533	0.993301
SL005687	eIF-5A-1	0.0851131	-0.151212	0.321438	0.480259	0.37671	0.205282	0.995222	0.0708558	-0.127828	0.26954	0.484568	0.993301
SL000481	IL-5	-0.0639612	-0.241581	0.113658	0.48032	0	0.971066	0.995222	-0.0523772	-0.233506	0.128751	0.570873	0.993301
SL003704	BID	0.0630828	-0.112782	0.238948	0.482032	0	0.42045	0.995222	0.0839343	-0.0953187	0.263187	0.358753	0.993301
SL006713	Collectin Kidney 1	0.0629906	-0.11286	0.238841	0.482636	0	0.878386	0.995222	-0.0551795	-0.23056	0.120201	0.537461	0.993301
SL008008	ARGI1	0.0634183	-0.113671	0.240508	0.482747	0	0.421112	0.995222	0.065174	-0.115406	0.245754	0.47933	0.993301
SL014148	ROBO3	0.0830211	-0.14914	0.315182	0.483375	0.354006	0.213431	0.995222	0.0443156	-0.152371	0.241002	0.658778	0.993301
SL005437	MEPE	-0.0591614	-0.226015	0.107692	0.48709	0	0.349835	0.995222	-0.0442365	-0.215898	0.127425	0.613507	0.993301
SL010503	MAPK2	0.103617	-0.188938	0.396171	0.48757	0.592385	0.117278	0.995222	0.0466743	-0.171598	0.264947	0.675136	0.993301
SL004768	AIF1	-0.0723275	-0.276583	0.131928	0.487665	0.200337	0.263452	0.995222	-0.0871874	-0.287172	0.112797	0.392835	0.993301
SL006920	MAPK14	-0.0623862	-0.238974	0.114202	0.488668	0	0.635504	0.995222	-0.0638341	-0.243938	0.116269	0.487262	0.993301
SL004180	CD30	-0.0625128	-0.239613	0.114587	0.489044	0	0.916887	0.995222	-0.0579061	-0.238464	0.122652	0.529628	0.993301
SL001731	NSE	0.0915577	-0.168143	0.351258	0.489573	0.477722	0.166443	0.995222	0.079354	-0.103779	0.262487	0.395725	0.993301
SL001721	PECAM-1	0.0792435	-0.145738	0.304225	0.489979	0.314792	0.227024	0.995222	0.0773571	-0.103176	0.25789	0.401003	0.993301
SL006921	PDK1	-0.0943686	-0.362674	0.173937	0.490597	0.503603	0.155801	0.995222	-0.0747641	-0.366951	0.217422	0.616011	0.993301
SL000134	Met	0.0822062	-0.151859	0.316272	0.491226	0.365658	0.209275	0.995222	0.117739	-0.0621931	0.297672	0.199664	0.993301
SL004910	aldolase A	-0.0620223	-0.238787	0.114742	0.491639	0	0.328788	0.995222	-0.0376472	-0.217772	0.142478	0.682067	0.993301
SL005160	ESAM	0.113983	-0.211185	0.43915	0.49206	0.656895	0.0877834	0.995222	0.138178	-0.0885951	0.364951	0.23238	0.993301
SL000565	Renin	0.0617615	-0.114824	0.238347	0.493026	0	0.412794	0.995222	0.0464441	-0.13352	0.226408	0.612985	0.993301
SL005158	DC-SIGNR	0.0728207	-0.135817	0.281458	0.493921	0.232541	0.253666	0.995222	0.0467063	-0.132975	0.226388	0.610422	0.993301
SL003648	Rab GDP dissociation inhibitor beta	0.0617925	-0.115438	0.239023	0.494384	0	0.47208	0.995222	0.0384829	-0.142118	0.219084	0.676215	0.993301
SL004144	GFRa-3	-0.107147	-0.414856	0.200561	0.494935	0.620744	0.104418	0.995222	-0.116873	-0.474122	0.240375	0.521394	0.993301
SL007022	HNRPQ	0.0652158	-0.12212	0.252552	0.495045	0.089292	0.294695	0.995222	0.0416925	-0.137667	0.221052	0.64868	0.993301
SL004338	FGF-20	-0.0616815	-0.238939	0.115576	0.495224	0	0.380124	0.995222	-0.0294359	-0.209946	0.151074	0.749261	0.997339
SL007274	EFNB2	-0.138925	-0.538226	0.260375	0.495293	0.771832	0.0363046	0.995222	-0.0723323	-0.420553	0.275889	0.683918	0.993301
SL010463	GPC2	-0.0593164	-0.230093	0.11146	0.496023	0	0.756376	0.995222	-0.0506946	-0.224818	0.123429	0.568253	0.993301
SL004366	TWEAKR	-0.0613563	-0.238401	0.115689	0.496985	0	0.636425	0.995222	-0.0567884	-0.237347	0.12377	0.537605	0.993301
SL006892	ABL1	-0.0610527	-0.237495	0.115389	0.497651	0	0.97869	0.995222	-0.0542687	-0.234187	0.12565	0.554398	0.993301
SL010374	METAP1	0.133172	-0.252296	0.518641	0.498323	0.754948	0.0433738	0.995222	0.115796	-0.216584	0.448176	0.494721	0.993301
SL018947	UBP25	-0.0611488	-0.238424	0.116126	0.498999	0	0.907119	0.995222	-0.0813755	-0.262068	0.0993168	0.377411	0.993301
SL003915	kallikrein 8	-0.132219	-0.515721	0.251283	0.499212	0.750215	0.0454076	0.995222	-0.0858747	-0.374963	0.203213	0.560422	0.993301
SL005199	MICA	-0.0615493	-0.240643	0.117544	0.500576	0.0175861	0.313017	0.995222	-0.103707	-0.283672	0.0762585	0.258708	0.993301
SL004635	CD30 Ligand	-0.138631	-0.542627	0.265364	0.501225	0.775932	0.0346381	0.995222	-0.202411	-0.605743	0.200922	0.325312	0.993301
SL005236	NovH	0.0605649	-0.11638	0.23751	0.502311	0	0.348401	0.995222	0.0875184	-0.0927239	0.267761	0.341259	0.993301
SL010467	RGMA	-0.162443	-0.637787	0.312901	0.502989	0.839008	0.0126925	0.995222	-0.0963917	-0.496386	0.303603	0.636701	0.993301
SL005200	MICB	0.0604459	-0.116825	0.237717	0.503936	0	0.43645	0.995222	0.0189702	-0.161347	0.199287	0.836637	0.997339
SL010391	WFKN2	0.0601393	-0.116541	0.23682	0.504682	0	0.340507	0.995222	0.0984256	-0.0813897	0.278241	0.283349	0.993301
SL000515	MCP-2	0.102384	-0.198599	0.403368	0.504955	0.601882	0.112995	0.995222	0.145564	-0.0930867	0.384215	0.231903	0.993301
SL010455	Contactin-5	-0.0601644	-0.237262	0.116934	0.505509	0	0.90782	0.995222	-0.086843	-0.266211	0.0925248	0.342652	0.993301
SL000324	C8	0.0595327	-0.116441	0.235506	0.507288	0	0.746444	0.995222	0.0127666	-0.166124	0.191657	0.88876	0.997339
SL000011	AFP	0.0854125	-0.167669	0.338494	0.508312	0.452065	0.176715	0.995222	0.0779048	-0.125214	0.281023	0.452213	0.993301
SL003655	Transketolase	0.0591355	-0.11795	0.236221	0.512785	0	0.424812	0.995222	0.0488637	-0.131601	0.229329	0.595633	0.993301
SL004652	WIF-1	0.0574904	-0.114865	0.229846	0.513267	0	0.957322	0.995222	0.0985182	-0.0767809	0.273817	0.270679	0.993301
SL003199	sTie-1	-0.118374	-0.473604	0.236856	0.513678	0.712173	0.0623288	0.995222	-0.200413	-0.571769	0.170942	0.290167	0.993301
SL004815	14-3-3 protein beta/alpha	0.0587458	-0.118337	0.235829	0.515561	0	0.59207	0.995222	0.0695089	-0.110982	0.25	0.450368	0.993301
SL000009	ERBB2	0.0588695	-0.118602	0.236341	0.5156	0	0.868979	0.995222	0.0761443	-0.104756	0.257044	0.409379	0.993301
SL010376	MMEL2	0.0584467	-0.118244	0.235137	0.516772	0	0.798116	0.995222	0.0331551	-0.14681	0.213121	0.718036	0.993301
SL014113	NLGNX	-0.0584959	-0.235547	0.118555	0.517274	0	0.874731	0.995222	-0.069129	-0.249643	0.111385	0.452904	0.993301
SL017612	HSP 90a/b	-0.0584939	-0.235638	0.11865	0.517509	0	0.933496	0.995222	-0.143051	-0.321867	0.0357639	0.11689	0.953592
SL010368	IDUA	-0.140166	-0.565383	0.285052	0.518234	0.79877	0.025799	0.995222	-0.151667	-0.604188	0.300854	0.511244	0.993301
SL002702	PIM1	-0.0846627	-0.342019	0.172693	0.519075	0.462451	0.172591	0.995222	-0.0747011	-0.382876	0.233474	0.634721	0.993301
SL011708	ARP19	0.13166	-0.268839	0.532158	0.51937	0.778831	0.0334727	0.995222	0.0977014	-0.239061	0.434464	0.569611	0.993301
SL002755	PAPP-A	-0.0904941	-0.365888	0.1849	0.519548	0.529649	0.144812	0.995222	-0.0121468	-0.237993	0.213699	0.916048	0.997339
SL000003	Angiogenin	0.0613254	-0.1255	0.248151	0.519992	0.0819328	0.296639	0.995222	0.147225	-0.108569	0.403018	0.259287	0.993301
SL005699	Apo L1	0.0579476	-0.118659	0.234554	0.520161	0	0.429303	0.995222	-0.00842651	-0.187097	0.170244	0.926351	0.997339
SL000587	Thyroglobulin	-0.05544	-0.224487	0.113607	0.520366	0	0.897635	0.995222	-0.0581154	-0.230409	0.114178	0.508545	0.993301
SL004457	Protease nexin I	0.141903	-0.292862	0.576668	0.52236	0.805013	0.0235353	0.995222	0.123976	-0.283213	0.531165	0.550677	0.993301
SL004875	IL-1Rrp2	0.0577528	-0.11947	0.234976	0.523014	0	0.971151	0.995222	0.0259438	-0.154508	0.206396	0.778108	0.997339
SL008728	NRX3B	-0.110451	-0.450033	0.229131	0.523806	0.690668	0.0721785	0.995222	-0.0685432	-0.376152	0.239065	0.662307	0.993301
SL004336	FGF-18	-0.0576065	-0.23504	0.119827	0.52456	0	0.859455	0.995222	-0.0585278	-0.239409	0.122353	0.525959	0.993301
SL005725	GRB2-related adapter protein 2	-0.05756	-0.23509	0.11997	0.525121	0	0.514424	0.995222	-0.0729444	-0.253946	0.108057	0.429602	0.993301
SL006460	GP1BA	0.0570257	-0.119301	0.233352	0.526164	0	0.676533	0.995222	0.072388	-0.10738	0.252156	0.429978	0.993301
SL004070	Ubiquitin	-0.0571723	-0.23415	0.119806	0.526628	0	0.724361	0.995222	-0.0393581	-0.219779	0.141062	0.668972	0.993301
SL005206	NKp44	-0.0566495	-0.233595	0.120296	0.530341	0	0.993334	0.995222	-0.0420694	-0.222453	0.138314	0.647595	0.993301
SL007179	EPHB2	-0.14641	-0.604657	0.311836	0.531177	0.824581	0.0169586	0.995222	-0.134284	-0.62053	0.351962	0.58832	0.993301
SL008416	MRC2	0.0976473	-0.208035	0.403329	0.531254	0.615963	0.1066	0.995222	0.0638267	-0.192598	0.320252	0.625653	0.993301
SL004068	Granzyme B	0.0565181	-0.121079	0.234115	0.532802	0	0.838067	0.995222	0.0488084	-0.132167	0.229784	0.597086	0.993301
SL000358	Coagulation Factor VII	-0.0559408	-0.232259	0.120377	0.534045	0	0.979672	0.995222	-0.0509666	-0.230718	0.128785	0.578397	0.993301
SL004330	CD22	0.056032	-0.120819	0.232883	0.534614	0	0.52863	0.995222	0.0655375	-0.114783	0.245858	0.476247	0.993301
SL014129	H6ST1	-0.131199	-0.546092	0.283695	0.5354	0.790834	0.0287771	0.995222	-0.0854641	-0.524805	0.353877	0.703004	0.993301
SL002505	ANP	-0.0561336	-0.233677	0.12141	0.535469	0	0.719173	0.995222	-0.0467809	-0.22784	0.134279	0.612574	0.993301
SL004823	Cyclophilin A	-0.0555791	-0.231731	0.120573	0.536309	0	0.432978	0.995222	-0.0486331	-0.228229	0.130963	0.595597	0.993301
SL000087	IL-6	0.0558794	-0.121706	0.233465	0.537414	0	0.750182	0.995222	0.0483662	-0.132705	0.229438	0.600607	0.993301
SL004515	PGRP-S	-0.0555698	-0.232483	0.121344	0.538133	0	0.846353	0.995222	-0.0730195	-0.253244	0.107205	0.42714	0.993301
SL016130	BRF-1	0.13704	-0.299466	0.573545	0.53834	0.816351	0.0196224	0.995222	0.0983304	-0.292354	0.489015	0.621802	0.993301
SL008611	ASAHL	0.0555405	-0.121395	0.232476	0.538399	0	0.573143	0.995222	0.101219	-0.0786806	0.281119	0.270132	0.993301
SL002650	M2-PK	0.0778257	-0.171769	0.32742	0.541112	0.435537	0.183185	0.995222	0.0299221	-0.164472	0.224316	0.762891	0.997339
SL006523	MFGM	0.0546978	-0.122001	0.231397	0.544041	0	0.410027	0.995222	0.0787043	-0.101345	0.258754	0.391582	0.993301
SL003916	kallikrein 12	0.0649914	-0.145234	0.275217	0.544565	0.236939	0.252302	0.995222	0.0508721	-0.176419	0.278163	0.660895	0.993301
SL011888	SMOC1	0.054574	-0.122387	0.231535	0.545549	0	0.379317	0.995222	0.130755	-0.0481831	0.309693	0.152087	0.953592
SL011100	CD226	0.104792	-0.235188	0.444771	0.545764	0.68279	0.0758114	0.995222	0.0720428	-0.277998	0.422083	0.686665	0.993301
SL016554	PDE9A	-0.0541799	-0.230539	0.122179	0.547088	0	0.763821	0.995222	-0.052137	-0.231987	0.127713	0.569916	0.993301
SL005572	Gelsolin	-0.0612196	-0.260754	0.138315	0.547614	0.174849	0.270956	0.995222	0.0757738	-0.0994726	0.25102	0.39674	0.993301
SL005224	Thrombopoietin Receptor	0.0898678	-0.203279	0.383014	0.547938	0.575726	0.124724	0.995222	0.109126	-0.193451	0.411703	0.479647	0.993301
SL011770	LCMT1	0.113944	-0.257913	0.485802	0.548126	0.734279	0.0523875	0.995222	0.108378	-0.25441	0.471166	0.558204	0.993301
SL011528	RS7	-0.0542647	-0.231637	0.123108	0.548757	0	0.782068	0.995222	-0.0613132	-0.242169	0.119542	0.506394	0.993301
SL004143	GFRa-2	-0.127788	-0.545638	0.290063	0.548907	0.792284	0.0282249	0.995222	-0.0935485	-0.535128	0.348031	0.677983	0.993301
SL004871	DR6	-0.131223	-0.561596	0.299149	0.550103	0.804664	0.0236601	0.995222	-0.0916964	-0.463139	0.279746	0.628494	0.993301
SL006119	TFF3	0.052909	-0.122029	0.227847	0.553328	0	0.61677	0.995222	0.13904	-0.0368406	0.31492	0.12128	0.953592
SL003192	Properdin	0.0524893	-0.121391	0.22637	0.554083	0	0.589904	0.995222	0.0899907	-0.0869632	0.266945	0.318887	0.993301
SL005084	Periostin	-0.066423	-0.286752	0.153906	0.554604	0.298136	0.232619	0.995222	-0.00851039	-0.188173	0.171153	0.92603	0.997339
SL013928	PPIE	0.0529315	-0.122798	0.228661	0.554949	0	0.339059	0.995222	0.0402399	-0.13889	0.21937	0.659729	0.993301
SL007888	Cystatin-S	-0.0528175	-0.228573	0.122937	0.555858	0	0.321937	0.995222	-0.081534	-0.277238	0.11417	0.414181	0.993301
SL014684	OAS1	0.0575306	-0.135053	0.250114	0.558211	0.121322	0.28606	0.995222	0.0703262	-0.160501	0.301154	0.550413	0.993301
SL000584	TGF-b1	-0.0528161	-0.22967	0.124038	0.558327	0	0.453589	0.995222	-0.0458553	-0.226222	0.134512	0.618281	0.993301
SL003182	Integrin aVb5	-0.0528761	-0.230322	0.12457	0.559195	0	0.968517	0.995222	-0.0614948	-0.242446	0.119456	0.505361	0.993301
SL003171	FGF-4	0.0528268	-0.124677	0.23033	0.559688	0	0.580368	0.995222	0.0543889	-0.126657	0.235435	0.555994	0.993301
SL005372	Sorting nexin 4	0.0526882	-0.124374	0.229751	0.559742	0	0.704041	0.995222	0.0713657	-0.109135	0.251866	0.438384	0.993301
SL007560	STAB2	0.052531	-0.124034	0.229095	0.559811	0	0.542988	0.995222	0.0311093	-0.148834	0.211053	0.734726	0.997339
SL003198	Tenascin	-0.10838	-0.473158	0.256397	0.560343	0.730716	0.0539726	0.995222	-0.149189	-0.520225	0.221848	0.430653	0.993301
SL004814	Coactosin-like protein	0.0525301	-0.124272	0.229332	0.560344	0	0.741117	0.995222	0.0856822	-0.0941387	0.265503	0.350358	0.993301
SL010328	MED-1	-0.112743	-0.492424	0.266939	0.560573	0.749276	0.0458132	0.995222	-0.0628796	-0.389525	0.263766	0.705954	0.993301
SL010612	Dkk-4	0.0525277	-0.124396	0.229452	0.560632	0	0.383298	0.995222	0.0596044	-0.120834	0.240043	0.51735	0.993301
SL004718	Karyopherin-a2	-0.0523841	-0.229201	0.124433	0.561467	0	0.873419	0.995222	-0.0402506	-0.22053	0.140029	0.661678	0.993301
SL000668	CD36 ANTIGEN	-0.0777457	-0.340344	0.184852	0.56173	0.484616	0.163636	0.995222	-0.211605	-0.489974	0.0667633	0.136253	0.953592
SL002561	PTHrP	-0.051678	-0.226651	0.123295	0.562675	0	0.854157	0.995222	-0.0633652	-0.241773	0.115043	0.486353	0.993301
SL005115	Spondin-1	0.0520455	-0.124368	0.228459	0.56311	0	0.563317	0.995222	0.0714002	-0.1083	0.251101	0.436127	0.993301
SL004296	Myokinase, human	0.0519393	-0.124228	0.228107	0.563363	0	0.36296	0.995222	0.0741698	-0.105371	0.253711	0.418126	0.993301
SL003461	ACTH	-0.0517912	-0.227826	0.124243	0.564181	0	0.573658	0.995222	-0.0421289	-0.221643	0.137386	0.645538	0.993301
SL007173	GRN	-0.0953158	-0.420564	0.229932	0.565712	0.660442	0.0861432	0.995222	-0.0610488	-0.361945	0.239848	0.690883	0.993301
SL014208	CRTAM	-0.0519822	-0.229523	0.125559	0.566065	0	0.851539	0.995222	-0.0379225	-0.218887	0.143042	0.681274	0.993301
SL000479	IL-3	-0.0514518	-0.22738	0.124476	0.566503	0	0.837468	0.995222	-0.0601948	-0.239593	0.119203	0.510768	0.993301
SL013754	RASA1	-0.0517226	-0.228889	0.125443	0.567187	0	0.323113	0.995222	-0.0569181	-0.249119	0.135283	0.561631	0.993301
SL010495	CDK2/cyclin A	0.0517548	-0.125863	0.229373	0.567932	0	0.845546	0.995222	0.0701287	-0.110908	0.251166	0.447712	0.993301
SL003703	BFL1	0.0512603	-0.124697	0.227218	0.568013	0	0.548242	0.995222	0.090044	-0.0887633	0.268851	0.323642	0.993301
SL004940	PTP-1C	0.100892	-0.247397	0.44918	0.570198	0.717315	0.0599955	0.995222	0.0956588	-0.248388	0.439705	0.585789	0.993301
SL003320	VEGF-D	0.0511226	-0.125373	0.227618	0.570231	0	0.339171	0.995222	0.0572877	-0.124216	0.238791	0.536166	0.993301
SL004458	Elafin	-0.0508173	-0.226881	0.125247	0.571596	0	0.843353	0.995222	-0.0258157	-0.205	0.153368	0.777653	0.997339
SL004750	DEAD-box protein 19B	0.130038	-0.321399	0.581476	0.572363	0.819492	0.0185875	0.995222	0.126588	-0.311993	0.565169	0.571593	0.993301
SL000539	PHI	-0.0509321	-0.227823	0.125958	0.572527	0	0.940114	0.995222	-0.133569	-0.312187	0.045049	0.142745	0.953592
SL006378	Esterase D	0.0510049	-0.126169	0.228179	0.572595	0	0.647515	0.995222	0.0136401	-0.166713	0.193993	0.88216	0.997339
SL010521	BTK	0.101011	-0.250699	0.452721	0.573503	0.708516	0.063994	0.995222	0.0876316	-0.238603	0.413866	0.598557	0.993301
SL018548	alpha-1-antichymotrypsin complex	-0.0506777	-0.227294	0.125939	0.573854	0	0.973816	0.995222	-0.044487	-0.224598	0.135624	0.62831	0.993301
SL008916	DPP2	-0.049858	-0.223881	0.124165	0.574432	0	0.757533	0.995222	-0.047818	-0.225244	0.129608	0.597341	0.993301
SL011404	PDE4D	0.0503312	-0.126281	0.226944	0.576467	0	0.79077	0.995222	0.0518862	-0.128013	0.231786	0.571877	0.993301
SL008099	CAPG	-0.0502382	-0.22703	0.126554	0.577559	0	0.585438	0.995222	-0.0468489	-0.227137	0.133439	0.610536	0.993301
SL011498	PACAP-38	0.110396	-0.279069	0.49986	0.578511	0.759195	0.0415672	0.995222	0.094603	-0.222764	0.41197	0.559059	0.993301
SL004661	Aggrecan	-0.05014	-0.227467	0.127187	0.579451	0	0.763462	0.995222	0.0242505	-0.155173	0.203674	0.791082	0.997339
SL005191	ILT-4	-0.10231	-0.465495	0.260875	0.580862	0.721747	0.0579935	0.995222	-0.102017	-0.498901	0.294867	0.614402	0.993301
SL004852	B7-H1	0.0498788	-0.127287	0.227045	0.581084	0	0.960309	0.995222	0.0306258	-0.149939	0.211191	0.739564	0.997339
SL005226	TSLP R	-0.0499604	-0.227444	0.127524	0.581143	0	0.944582	0.995222	-0.0341379	-0.215083	0.146808	0.71155	0.993301
SL004938	CaMKK alpha	0.0988209	-0.252563	0.450205	0.581492	0.701768	0.0670786	0.995222	0.108813	-0.256898	0.474524	0.559781	0.993301
SL000638	Cadherin-2	-0.0486963	-0.222359	0.124966	0.582601	0	0.410351	0.995222	-0.0184009	-0.195258	0.158456	0.838414	0.997339
SL017614	PKB a/b/g	0.150804	-0.387515	0.689124	0.582962	0.873521	0.00492589	0.995222	0.140241	-0.376604	0.657086	0.594852	0.993301
SL015510	UCRP	0.049462	-0.127683	0.226607	0.584202	0	0.645857	0.995222	0.0525905	-0.12808	0.233261	0.568328	0.993301
SL002654	Epithelial cell kinase	0.0493008	-0.12757	0.226172	0.584847	0	0.668601	0.995222	0.0842752	-0.0957905	0.264341	0.35898	0.993301
SL018971	ZNRF3	0.0930736	-0.241135	0.427282	0.585183	0.730861	0.053908	0.995222	0.108026	-0.292199	0.508252	0.596791	0.993301
SL002602	Trefoil factor 2	0.0489079	-0.126747	0.224562	0.58526	0	0.478243	0.995222	0.0577168	-0.121411	0.236844	0.5277	0.993301
SL010518	TEC	0.0671319	-0.174468	0.308732	0.586026	0.399227	0.196994	0.995222	0.0603201	-0.200638	0.321278	0.650518	0.993301
SL003524	Protein disulfide isomerase A3	0.0491031	-0.127695	0.225901	0.5862	0	0.337442	0.995222	0.0327842	-0.147467	0.213035	0.721481	0.993301
SL003304	IGF-I sR	0.0660534	-0.17202	0.304127	0.586586	0.384643	0.202386	0.995222	0.0167087	-0.201228	0.234645	0.880555	0.997339
SL004654	Granzyme H	0.048957	-0.127919	0.225833	0.587479	0	0.770613	0.995222	0.0412244	-0.139082	0.221531	0.654069	0.993301
SL007024	GREM1	-0.0461236	-0.21317	0.120923	0.588391	0	0.933997	0.995222	-0.0367307	-0.206995	0.133534	0.672429	0.993301
SL014268	OX2G	0.0485475	-0.127773	0.224868	0.58944	0	0.814763	0.995222	0.0325316	-0.147157	0.21222	0.722709	0.993301
SL005403	Lectin, mannose-binding 2	0.0486708	-0.128187	0.225529	0.589627	0	0.882594	0.995222	0.0328058	-0.14742	0.213031	0.721268	0.993301
SL004829	S100A7	0.0946429	-0.249363	0.438649	0.589731	0.698947	0.0683724	0.995222	0.0572794	-0.259323	0.373882	0.722893	0.993301
SL009790	RUXF	-0.0486853	-0.225885	0.128514	0.590234	0	0.418577	0.995222	-0.020142	-0.200649	0.160365	0.826881	0.997339
SL008382	CYTD	0.109408	-0.288885	0.507701	0.59031	0.767709	0.0380015	0.995222	0.152053	-0.216251	0.520357	0.41842	0.993301
SL008158	H31	-0.0777711	-0.361875	0.206333	0.591597	0.555467	0.133653	0.995222	-0.0238213	-0.250245	0.202602	0.836634	0.997339
SL005193	JAM-B	0.0482238	-0.128594	0.225041	0.592965	0	0.874615	0.995222	0.0314578	-0.148745	0.211661	0.732239	0.997339
SL008360	FLRT2	-0.136473	-0.636973	0.364026	0.593043	0.854656	0.00871549	0.995222	-0.10296	-0.565696	0.359775	0.662765	0.993301
SL004720	Calcineurin B a	0.0479013	-0.129216	0.225019	0.596063	0	0.716981	0.995222	0.0433428	-0.13725	0.223936	0.638071	0.993301
SL019978	IFNA7	-0.047715	-0.224865	0.129435	0.59756	0	0.947243	0.995222	-0.0326371	-0.213212	0.147938	0.723156	0.993301
SL010610	CLC4K	-0.0478017	-0.225374	0.12977	0.597766	0	0.499252	0.995222	-0.0470794	-0.228192	0.134033	0.610412	0.993301
SL002081	Cadherin-5	-0.0959069	-0.452215	0.260401	0.597805	0.712375	0.0622368	0.995222	-0.0778831	-0.344924	0.189158	0.567574	0.993301
SL003700	BAD	0.0476247	-0.129497	0.224747	0.598196	0	0.353196	0.995222	0.0424814	-0.163639	0.248602	0.686251	0.993301
SL005202	MSP	-0.0612514	-0.289318	0.166815	0.598621	0.340038	0.218341	0.995222	-0.0478854	-0.227362	0.131591	0.601023	0.993301
SL003687	Nucleoside diphosphate kinase A	0.0740163	-0.201913	0.349945	0.599063	0.529611	0.144828	0.995222	0.108295	-0.221371	0.43796	0.519675	0.993301
SL006998	PDPK1	0.0786525	-0.216344	0.373649	0.601274	0.588733	0.118918	0.995222	0.0800436	-0.202831	0.362919	0.579168	0.993301
SL001815	Mn SOD	0.062187	-0.171221	0.295595	0.601535	0.368559	0.208232	0.995222	0.108085	-0.120393	0.336562	0.353828	0.993301
SL009868	SSRP1	0.0471344	-0.129792	0.224061	0.601567	0	0.387446	0.995222	0.0489517	-0.130771	0.228674	0.593451	0.993301
SL004939	PTP-1B	0.0956905	-0.264685	0.456066	0.602765	0.719309	0.0590938	0.995222	0.0941074	-0.289208	0.477423	0.630383	0.993301
SL003322	VEGF sR3	-0.0568811	-0.271131	0.157369	0.60282	0.265231	0.243369	0.995222	-0.0285588	-0.22203	0.164912	0.77234	0.997339
SL005156	DAN	-0.0463283	-0.222775	0.130118	0.606822	0	0.479332	0.995222	-0.00198412	-0.181427	0.177459	0.98271	0.997339
SL004869	Carbonic anhydrase XIII	0.0461302	-0.130226	0.222486	0.608177	0	0.373827	0.995222	0.0562069	-0.123619	0.236033	0.540133	0.993301
SL003522	ERP29	-0.0459378	-0.222385	0.130509	0.609859	0	0.782087	0.995222	-0.0695437	-0.249074	0.109986	0.44772	0.993301
SL021043	GDF-11/8	-0.140813	-0.681762	0.400136	0.609917	0.876421	0.00444615	0.995222	-0.0972527	-0.579494	0.384989	0.692649	0.993301
SL007033	LTBP4	-0.111466	-0.540857	0.317925	0.610901	0.804243	0.0238107	0.995222	-0.0896009	-0.503205	0.324003	0.671131	0.993301
SL000001	MUC1	-0.0459768	-0.223251	0.131297	0.611225	0	0.405896	0.995222	-0.0424791	-0.223287	0.138329	0.645176	0.993301
SL008157	UB2L3	0.0459801	-0.131356	0.223316	0.611324	0	0.824382	0.995222	0.0480671	-0.132702	0.228836	0.602255	0.993301
SL004704	COMMD7	0.109032	-0.312417	0.53048	0.612115	0.791368	0.0285733	0.995222	0.122887	-0.388089	0.633863	0.637383	0.993301
SL004683	Noggin	-0.0457141	-0.222536	0.131108	0.612356	0	0.342318	0.995222	-0.0641632	-0.244373	0.116047	0.485278	0.993301
SL012457	NXPH1	-0.0453036	-0.220684	0.130077	0.612653	0	0.665703	0.995222	-0.0268468	-0.205429	0.151736	0.768264	0.997339
SL013969	KYNU	-0.0453436	-0.221136	0.130449	0.613173	0	0.504645	0.995222	-0.127327	-0.308722	0.0540672	0.168893	0.968167
SL008865	PSA2	-0.0456503	-0.22286	0.131559	0.613629	0	0.983118	0.995222	-0.00579851	-0.185823	0.174226	0.949663	0.997339
SL007674	LY9	0.0665239	-0.191761	0.324809	0.613694	0.47604	0.167125	0.995222	0.0316879	-0.163275	0.226651	0.750061	0.997339
SL014270	CLM6	-0.132285	-0.646273	0.381702	0.613954	0.86321	0.00685541	0.995222	-0.170038	-0.704349	0.364274	0.532803	0.993301
SL000414	Factor B	0.0659331	-0.192547	0.324414	0.617112	0.466488	0.170975	0.995222	-0.00162316	-0.290797	0.287551	0.991222	0.997339
SL011616	IF4A3	-0.0447606	-0.220389	0.130868	0.617415	0	0.376416	0.995222	-0.0262475	-0.204891	0.152396	0.773369	0.997339
SL017290	PolyUbiquitin K63	0.0450621	-0.13193	0.222054	0.617774	0	0.569451	0.995222	0.00422969	-0.175499	0.183958	0.96321	0.997339
SL000615	Vasoactive Intestinal Peptide	0.0623188	-0.182619	0.307257	0.618013	0.410764	0.192666	0.995222	0.0779996	-0.147791	0.30379	0.498361	0.993301
SL010973	PSA1	-0.0449796	-0.22182	0.131861	0.618118	0	0.905186	0.995222	-0.0432336	-0.223593	0.137126	0.638485	0.993301
SL008956	ARSB	0.0447611	-0.131798	0.221321	0.619268	0	0.510216	0.995222	0.0405221	-0.139513	0.220557	0.659106	0.993301
SL004334	FGF-16	0.0447892	-0.132533	0.222112	0.620559	0	0.666449	0.995222	0.0501957	-0.130655	0.231046	0.586445	0.993301
SL000605	Ubiquitin+1	-0.0445213	-0.22163	0.132588	0.62223	0	0.60385	0.995222	-0.0478642	-0.228494	0.132765	0.603508	0.993301
SL002756	hnRNP K	-0.0458214	-0.228244	0.136602	0.622502	0.0603576	0.302251	0.995222	-0.0560646	-0.255516	0.143386	0.581678	0.993301
SL010515	RPS6KA3	0.0545004	-0.163083	0.272083	0.623473	0.281457	0.238117	0.995222	0.0301025	-0.162315	0.22252	0.75913	0.997339
SL000616	Vitronectin	-0.0442562	-0.221043	0.132531	0.623674	0	0.80144	0.995222	-0.0280182	-0.208146	0.15211	0.76047	0.997339
SL013988	CHST2	-0.0441172	-0.221069	0.132834	0.625087	0	0.323235	0.995222	-0.0428789	-0.223358	0.1376	0.641462	0.993301
SL004671	BAFF Receptor	0.044001	-0.133138	0.22114	0.626364	0	0.60909	0.995222	-0.00140999	-0.181349	0.178529	0.987746	0.997339
SL004737	Tropomyosin 1 alpha chain	0.0435606	-0.132108	0.219229	0.626957	0	0.699809	0.995222	0.0231864	-0.155867	0.20224	0.799647	0.997339
SL014096	LRRT1	-0.0434088	-0.219639	0.132822	0.629255	0	0.83483	0.995222	-0.0244438	-0.204061	0.155174	0.789679	0.997339
SL000483	IL-7	-0.0433946	-0.220678	0.133889	0.631405	0	0.942628	0.995222	-0.045113	-0.225855	0.135629	0.624698	0.993301
SL014469	SHC1	-0.0481938	-0.245093	0.148705	0.63142	0.155695	0.276461	0.995222	-0.0522751	-0.235337	0.130787	0.575693	0.993301
SL002621	Midkine	0.0458959	-0.141646	0.233438	0.631477	0.084454	0.295974	0.995222	0.0740819	-0.105956	0.25412	0.419964	0.993301
SL003862	CD40 ligand, soluble	0.0432181	-0.133482	0.219919	0.631671	0	0.775301	0.995222	0.0389883	-0.141225	0.219202	0.671545	0.993301
SL004151	IL-15 Ra	-0.0433248	-0.220723	0.134074	0.632175	0	0.772049	0.995222	-0.0558164	-0.236715	0.125082	0.545345	0.993301
SL003722	PKB beta	0.0686515	-0.212468	0.349771	0.632197	0.543245	0.138967	0.995222	0.107707	-0.159665	0.375078	0.429795	0.993301
SL014209	KLRF1	0.0430211	-0.134018	0.220061	0.633877	0	0.625808	0.995222	0.0637417	-0.116588	0.244072	0.488439	0.993301
SL003080	MIF	-0.0429941	-0.220128	0.13414	0.634271	0	0.775906	0.995222	-0.0460303	-0.226651	0.13459	0.617436	0.993301
SL003104	Eotaxin-2	-0.0429503	-0.220449	0.134549	0.635313	0	0.682511	0.995222	-0.0434322	-0.224447	0.137583	0.638164	0.993301
SL008837	CD63	-0.0426522	-0.219257	0.133952	0.63596	0	0.739515	0.995222	-0.0508935	-0.230708	0.128921	0.579076	0.993301
SL002792	BARK1	0.0425908	-0.134139	0.21932	0.636684	0	0.563282	0.995222	0.0197176	-0.160398	0.199833	0.830109	0.997339
SL013989	RSPO2	0.0427082	-0.134813	0.220229	0.637262	0	0.384379	0.995222	-0.00791802	-0.188243	0.172407	0.931418	0.997339
SL004340	FGF-6	-0.0406466	-0.210616	0.129323	0.639279	0	0.53327	0.995222	-0.0286268	-0.201906	0.144652	0.746091	0.997339
SL018921	HEMK2	-0.0418164	-0.218179	0.134546	0.642134	0	0.375105	0.995222	0.0133562	-0.165494	0.192207	0.883632	0.997339
SL005231	UNC5H4	0.089757	-0.289119	0.468633	0.642417	0.746738	0.0469137	0.995222	0.196575	-0.145585	0.538736	0.260156	0.993301
SL004063	FGFR-3	0.166346	-0.537178	0.869869	0.643059	0.925762	0.000242384	0.995222	0.134696	-0.551896	0.821288	0.700603	0.993301
SL004299	Livin B	0.0417045	-0.135632	0.219041	0.644851	0	0.644773	0.995222	0.0152109	-0.165267	0.195689	0.868796	0.997339
SL007228	KPCI	0.0399468	-0.129924	0.209818	0.644867	0	0.677197	0.995222	0.0537642	-0.119367	0.226895	0.542758	0.993301
SL005165	Galectin-4	-0.0729693	-0.384005	0.238067	0.645653	0.62554	0.102223	0.995222	-0.0564903	-0.365483	0.252502	0.720102	0.993301
SL000320	C5a	-0.041331	-0.217538	0.134876	0.645712	0	0.676128	0.995222	-0.0574454	-0.236989	0.122098	0.530596	0.993301
SL000299	b-ECGF	0.0545268	-0.178593	0.287646	0.646639	0.355373	0.212946	0.995222	0.077176	-0.15133	0.305681	0.507995	0.993301
SL003188	MIG	-0.0658067	-0.347418	0.215804	0.64695	0.549322	0.136332	0.995222	-0.0472016	-0.282978	0.188575	0.694779	0.993301
SL005169	sICAM-5	0.060284	-0.198083	0.318651	0.647446	0.473208	0.168271	0.995222	0.066774	-0.199089	0.332637	0.622533	0.993301
SL008631	DSC2	0.0413301	-0.135817	0.218478	0.647472	0	0.963855	0.995222	0.110972	-0.0684141	0.290359	0.22533	0.993301
SL007181	TYK2	0.0411385	-0.135248	0.217525	0.647583	0	0.921497	0.995222	0.00657787	-0.172327	0.185483	0.942552	0.997339
SL004305	Topoisomerase I	-0.0422162	-0.224713	0.140281	0.650267	0.0405213	0.307303	0.995222	-0.0306533	-0.216306	0.154999	0.746232	0.997339
SL007680	ROBO2	-0.0404555	-0.217317	0.136406	0.653918	0	0.473178	0.995222	-0.0630067	-0.243263	0.117249	0.49329	0.993301
SL000048	Protein C	0.0399383	-0.135557	0.215433	0.655569	0	0.854456	0.995222	0.0366705	-0.142049	0.21539	0.687571	0.993301
SL000521	MMP-1	-0.0489653	-0.265258	0.167327	0.657255	0.272433	0.24105	0.995222	-0.0428443	-0.227554	0.141865	0.64938	0.993301
SL007311	SNP25	0.0400274	-0.1371	0.217155	0.657827	0	0.731534	0.995222	0.0083794	-0.171988	0.188747	0.927449	0.997339
SL004650	sFRP-3	-0.0397565	-0.216318	0.136805	0.658977	0	0.858627	0.995222	-0.0568119	-0.23654	0.122917	0.53556	0.993301
SL004637	MSP R	-0.0397634	-0.216519	0.136992	0.659272	0	0.85503	0.995222	-0.0677336	-0.247556	0.112088	0.460357	0.993301
SL013240	CRK	-0.0409142	-0.222907	0.141078	0.659484	0.0409965	0.307183	0.995222	-0.0433865	-0.223809	0.137036	0.637415	0.993301
SL010613	IL-17 RD	0.0398027	-0.137382	0.216988	0.659731	0	0.801399	0.995222	0.038684	-0.141803	0.21917	0.674425	0.993301
SL007195	CD70	-0.0406676	-0.221744	0.140409	0.659803	0.0326403	0.309281	0.995222	-0.0644095	-0.244778	0.115959	0.483987	0.993301
SL007385	IL24	-0.0397127	-0.216542	0.137116	0.659812	0	0.560909	0.995222	-0.0389035	-0.219136	0.141329	0.67225	0.993301
SL004920	Cofilin-1	0.065395	-0.226315	0.357105	0.660385	0.578624	0.123436	0.995222	0.0697846	-0.235695	0.375265	0.654342	0.993301
SL000022	D-dimer	0.03931	-0.13725	0.21587	0.662564	0	0.421043	0.995222	0.0607388	-0.119171	0.240649	0.508165	0.993301
SL006923	TBP	-0.0427935	-0.235883	0.150296	0.664015	0.119269	0.286622	0.995222	-0.0187153	-0.260055	0.222624	0.879194	0.997339
SL001716	IL-12	0.067044	-0.23684	0.370928	0.66544	0.604559	0.111784	0.995222	0.0715895	-0.249703	0.392882	0.662319	0.993301
SL004136	Dtk	-0.0572724	-0.318743	0.204199	0.667698	0.477492	0.166536	0.995222	-0.0735073	-0.342402	0.195388	0.592103	0.993301
SL008122	DUS3	-0.0467322	-0.260877	0.167413	0.668857	0.263022	0.244077	0.995222	-0.0606674	-0.240713	0.119378	0.508983	0.993301
SL005218	Siglec-7	0.0385296	-0.138058	0.215117	0.66891	0	0.633959	0.995222	-0.0361476	-0.214669	0.142374	0.691472	0.993301
SL005261	TCPTP	-0.0383536	-0.214146	0.137439	0.668931	0	0.406054	0.995222	-0.0406507	-0.219937	0.138636	0.656757	0.993301
SL005574	Aminoacylase-1	-0.038395	-0.215211	0.138421	0.6704	0	0.832773	0.995222	-0.160455	-0.336828	0.0159187	0.0745755	0.852912
SL003744	Galectin-3	0.0444413	-0.160849	0.249731	0.671352	0.205664	0.261857	0.995222	0.108141	-0.0705641	0.286846	0.235604	0.993301
SL010250	Stress-induced-phosphoprotein 1	0.0786421	-0.28665	0.443934	0.67306	0.723636	0.0571431	0.995222	0.0651047	-0.306874	0.437084	0.73157	0.997339
SL010371	CD39	0.0476603	-0.173836	0.269157	0.67322	0.301883	0.231369	0.995222	0.0133313	-0.221149	0.247812	0.911273	0.997339
SL011180	HXK1	0.0379188	-0.138966	0.214803	0.67437	0	0.461159	0.995222	-0.00298048	-0.182866	0.176905	0.974094	0.997339
SL000517	MCP-4	-0.0372223	-0.210932	0.136487	0.674501	0	0.974075	0.995222	-0.0219966	-0.199086	0.155092	0.807656	0.997339
SL009210	Corticotropin-lipotropin	0.0377748	-0.138605	0.214154	0.67466	0	0.369007	0.995222	0.0624108	-0.117065	0.241887	0.495519	0.993301
SL003674	BCL2-like 1 protein	0.043819	-0.160935	0.248573	0.674889	0.205608	0.261874	0.995222	0.0363863	-0.143589	0.216362	0.691919	0.993301
SL011400	PDE1A	-0.0377698	-0.214324	0.138785	0.675005	0	0.361669	0.995222	-0.0326075	-0.212669	0.147454	0.72264	0.993301
SL004687	TSLP	-0.0379492	-0.215436	0.139537	0.675166	0	0.67023	0.995222	-0.0291873	-0.210193	0.151818	0.751968	0.997339
SL000382	CK-MB	0.0377262	-0.138743	0.214195	0.675211	0	0.966289	0.995222	0.0860698	-0.0933074	0.265447	0.346991	0.993301
SL001766	HCG	-0.0377459	-0.214312	0.13882	0.675218	0	0.900151	0.995222	-0.0194401	-0.199088	0.160208	0.832035	0.997339
SL000540	Plasmin	-0.0378779	-0.215081	0.139326	0.675253	0	0.695908	0.995222	-0.0455339	-0.226099	0.135031	0.621127	0.993301
SL007229	STAT6	0.0784128	-0.289243	0.446068	0.675935	0.743173	0.0484681	0.995222	0.0623684	-0.294817	0.419554	0.732177	0.997339
SL006550	ECM1	-0.037494	-0.213605	0.138617	0.676477	0	0.536655	0.995222	-0.0396834	-0.219299	0.139932	0.664997	0.993301
SL004080	BMPR1A	0.0376434	-0.139522	0.214808	0.677083	0	0.834617	0.995222	0.0491323	-0.131519	0.229783	0.593994	0.993301
SL002922	sICAM-1	0.0372325	-0.139115	0.21358	0.679014	0	0.936863	0.995222	0.0247226	-0.155072	0.204517	0.787541	0.997339
SL014093	ENTP3	0.0373844	-0.139843	0.214612	0.679288	0	0.991645	0.995222	0.0151291	-0.165388	0.195646	0.869523	0.997339
SL000433	Glucagon	0.0690993	-0.25872	0.396919	0.679511	0.669518	0.0819457	0.995222	0.045684	-0.231941	0.323309	0.74706	0.997339
SL000530	OSM	0.0371921	-0.139737	0.214121	0.680338	0	0.333459	0.995222	0.0317434	-0.168102	0.231589	0.755557	0.997339
SL004331	CNTF	0.0368887	-0.138872	0.21265	0.680811	0	0.674914	0.995222	0.0334542	-0.145781	0.212689	0.714494	0.993301
SL003774	Apoptosis regulator Bcl-W	-0.0368329	-0.213569	0.139904	0.682931	0	0.7419	0.995222	-0.0259539	-0.205868	0.153961	0.777377	0.997339
SL004723	HDAC8	0.0366967	-0.139871	0.213264	0.683753	0	0.586121	0.995222	-0.00133368	-0.181007	0.178339	0.988392	0.997339
SL013872	LRP1B	-0.0367107	-0.213448	0.140027	0.683926	0	0.924354	0.995222	-0.0756103	-0.254889	0.103668	0.408459	0.993301
SL008760	SLIK1	0.0365519	-0.139894	0.212998	0.684729	0	0.383829	0.995222	0.0173524	-0.162439	0.197144	0.849964	0.997339
SL014488	VAV	0.0675497	-0.259601	0.394701	0.685705	0.661677	0.0855722	0.995222	0.0514917	-0.272293	0.375277	0.755273	0.997339
SL003717	Caspase-10	0.0364765	-0.140297	0.21325	0.685895	0	0.92235	0.995222	0.0792985	-0.100286	0.258883	0.38679	0.993301
SL010372	Enterokinase	0.0499683	-0.194015	0.293952	0.688122	0.41532	0.190942	0.995222	0.0678717	-0.149195	0.284939	0.539986	0.993301
SL016148	C34 gp41 HIV Fragment	-0.0358518	-0.212138	0.140434	0.690185	0	0.620868	0.995222	-0.0071012	-0.186612	0.17241	0.938199	0.997339
SL006919	RSK-like protein kinase	0.035996	-0.141031	0.213023	0.690237	0	0.580588	0.995222	0.0408609	-0.139636	0.221358	0.657261	0.993301
SL003993	BMP-6	-0.0708011	-0.41967	0.278068	0.690804	0.711877	0.0624631	0.995222	-0.103175	-0.45142	0.24507	0.561457	0.993301
SL003542	NG36	-0.0354027	-0.210268	0.139462	0.691508	0	0.37834	0.995222	0.0263114	-0.150795	0.203418	0.770916	0.997339
SL003690	RANK	0.0356046	-0.141011	0.212221	0.692757	0	0.436792	0.995222	0.00379319	-0.176023	0.183609	0.967021	0.997339
SL016557	HMGR	0.0353389	-0.140185	0.210863	0.693133	0	0.554261	0.995222	0.0207491	-0.158101	0.199599	0.820126	0.997339
SL003764	NCAM-120	0.0633669	-0.253768	0.380501	0.695337	0.641382	0.094944	0.995222	0.143929	-0.153001	0.44086	0.342091	0.993301
SL010450	CD48	-0.0352481	-0.212114	0.141618	0.696088	0	0.331338	0.995222	-0.0514017	-0.231728	0.128925	0.576377	0.993301
SL010489	CAMK1	-0.0352298	-0.21245	0.14199	0.696815	0	0.401779	0.995222	-0.0490276	-0.229729	0.131674	0.594883	0.993301
SL007631	SOST	0.0350075	-0.141521	0.211536	0.697512	0	0.628345	0.995222	0.0574094	-0.12246	0.237278	0.531598	0.993301
SL000558	Prothrombin	-0.0348359	-0.21119	0.141519	0.698639	0	0.553158	0.995222	-0.00857089	-0.188194	0.171052	0.925489	0.997339
SL016928	SLAF7	0.0340599	-0.140531	0.208651	0.702197	0	0.682234	0.995222	0.013043	-0.164914	0.191	0.885775	0.997339
SL000437	Haptoglobin, Mixed Type	0.0344888	-0.14242	0.211398	0.702388	0	0.82072	0.995222	0.0265236	-0.153794	0.206841	0.773117	0.997339
SL004851	ALK-1	-0.0343839	-0.211889	0.143121	0.704199	0	0.525834	0.995222	-0.0175076	-0.198322	0.163307	0.849485	0.997339
SL010461	FCGR1	0.0338631	-0.141011	0.208737	0.704293	0	0.331571	0.995222	0.0399225	-0.138411	0.218256	0.660831	0.993301
SL008703	CBPE	0.0851621	-0.355469	0.525793	0.70483	0.808166	0.0224207	0.995222	0.0894473	-0.405445	0.584339	0.723155	0.993301
SL002524	sCD4	0.0558675	-0.233777	0.345512	0.705398	0.565059	0.129444	0.995222	0.0546078	-0.195864	0.30508	0.669153	0.993301
SL004673	Cathepsin S	-0.0338688	-0.209724	0.141986	0.705817	0	0.566835	0.995222	-0.0539541	-0.233088	0.12518	0.55497	0.993301
SL000550	PCI	-0.0338259	-0.210378	0.142726	0.70728	0	0.707456	0.995222	-0.0142549	-0.1939	0.16539	0.876408	0.997339
SL002762	CgA	0.0337292	-0.142572	0.21003	0.707682	0	0.414227	0.995222	0.0308012	-0.148737	0.21034	0.736685	0.997339
SL016828	EGFRvIII	-0.0338773	-0.211415	0.14366	0.708407	0	0.964693	0.995222	0.00356202	-0.177154	0.184278	0.969184	0.997339
SL006912	FGR	0.0902921	-0.383213	0.563797	0.708595	0.838283	0.0128936	0.995222	0.0478018	-0.359085	0.454689	0.81789	0.997339
SL005210	Nr-CAM	0.0554896	-0.236282	0.347261	0.709335	0.588064	0.119218	0.995222	-0.0388912	-0.316218	0.238436	0.783426	0.997339
SL005174	IL-17B R	-0.0335206	-0.210407	0.143366	0.710325	0	0.924426	0.995222	-0.03719	-0.217597	0.143217	0.686185	0.993301
SL010520	AURKB	-0.0335156	-0.210806	0.143774	0.710996	0	0.732951	0.995222	-0.0352515	-0.216078	0.145575	0.702395	0.993301
SL005263	RAP	0.0847971	-0.363802	0.533396	0.711021	0.815625	0.019865	0.995222	0.0732979	-0.40167	0.548265	0.762297	0.997339
SL004759	eIF-5	0.033398	-0.14395	0.210746	0.712053	0	0.918935	0.995222	0.0350129	-0.145699	0.215725	0.704137	0.993301
SL002522	Rb	0.0387888	-0.168526	0.246104	0.713834	0.218491	0.257978	0.995222	0.00434723	-0.187003	0.195697	0.964484	0.997339
SL003196	TARC	-0.0328688	-0.209257	0.143519	0.714942	0	0.362478	0.995222	0.00405506	-0.17539	0.1835	0.964673	0.997339
SL004348	IFN-lambda 1	0.0504072	-0.220134	0.320948	0.714977	0.508858	0.153606	0.995222	0.0114336	-0.168967	0.191834	0.901141	0.997339
SL002528	NPS-PLA2	-0.0430162	-0.27546	0.189427	0.716819	0.357544	0.212174	0.995222	-0.0399713	-0.230889	0.150947	0.681552	0.993301
SL017529	KEAP1	0.0326647	-0.143952	0.209281	0.716986	0	0.778355	0.995222	0.0525382	-0.127375	0.232452	0.567087	0.993301
SL005155	Cripto	-0.0327075	-0.209754	0.144339	0.717291	0	0.410157	0.995222	-0.0380108	-0.218525	0.142503	0.67982	0.993301
SL009349	FSTL1	0.0598244	-0.264929	0.384578	0.718059	0.664243	0.0843855	0.995222	0.0713738	-0.188656	0.331404	0.590593	0.993301
SL005188	IL-5 Ra	-0.0325969	-0.209721	0.144527	0.718324	0	0.606864	0.995222	-0.0915754	-0.270808	0.0876567	0.31663	0.993301
SL007070	LDLR	-0.0325959	-0.209976	0.144784	0.718721	0	0.564639	0.995222	-0.0549725	-0.235651	0.125706	0.550954	0.993301
SL012698	KI2L4	0.0316364	-0.141179	0.204452	0.719744	0	0.971459	0.995222	0.00327377	-0.172747	0.179294	0.970921	0.997339
SL014070	SLIK5	-0.07082	-0.45847	0.316831	0.720294	0.756808	0.0425804	0.995222	0.0243879	-0.346601	0.395377	0.897482	0.997339
SL010508	PAK3	-0.0321748	-0.208723	0.144373	0.720948	0	0.960727	0.995222	-0.0529655	-0.23288	0.126949	0.563939	0.993301
SL004781	CSK	0.0608401	-0.276025	0.397705	0.723352	0.681163	0.0765627	0.995222	0.0551158	-0.26082	0.371051	0.732411	0.997339
SL011405	PDE5A	0.0319351	-0.145517	0.209388	0.724296	0	0.680644	0.995222	0.0296306	-0.151356	0.210617	0.748302	0.997339
SL004139	Ephrin-A3	0.0292489	-0.133804	0.192302	0.72515	0	0.577513	0.995222	-0.0358188	-0.200284	0.128647	0.669482	0.993301
SL008945	TGM3	-0.0315819	-0.208449	0.145285	0.726356	0	0.489026	0.995222	-0.0104405	-0.190616	0.169735	0.909577	0.997339
SL001947	MIA	-0.0960203	-0.634602	0.442561	0.726767	0.874398	0.00477793	0.995222	0.013728	-0.459723	0.487179	0.95468	0.997339
SL002684	CSF-1	-0.0339901	-0.224936	0.156955	0.72717	0.13025	0.2836	0.995222	-0.0162783	-0.194606	0.162049	0.858007	0.997339
SL012740	ATS15	0.0315645	-0.145812	0.208941	0.727255	0	0.548981	0.995222	0.022961	-0.157937	0.203859	0.803536	0.997339
SL005361	Apo D	0.0317703	-0.150272	0.213812	0.732309	0.0495024	0.305028	0.995222	0.00780165	-0.171441	0.187044	0.932016	0.997339
SL011772	PESC	-0.0297413	-0.201093	0.14161	0.733714	0	0.660733	0.995222	-0.0255052	-0.200159	0.149149	0.77471	0.997339
SL005694	Peroxiredoxin-6	0.0305171	-0.146539	0.207573	0.735502	0	0.914402	0.995222	0.0482609	-0.132184	0.228706	0.600139	0.993301
SL000409	ERK-1	0.0492197	-0.236829	0.335268	0.735931	0.561771	0.13089	0.995222	0.0310153	-0.23249	0.29452	0.817553	0.997339
SL004467	protein Z inhibitor	-0.0303437	-0.206745	0.146057	0.736008	0	0.555218	0.995222	-0.0373577	-0.217088	0.142372	0.683723	0.993301
SL004672	BCMA	0.0303157	-0.146517	0.207148	0.736862	0	0.363246	0.995222	0.0586161	-0.121539	0.238772	0.523668	0.993301
SL002722	CD38	0.0491106	-0.237747	0.335968	0.73721	0.571551	0.126576	0.995222	0.0508637	-0.256999	0.358727	0.746077	0.997339
SL016563	GHC2	0.0314226	-0.152324	0.215169	0.737493	0.0510671	0.30463	0.995222	0.013203	-0.167504	0.19391	0.886131	0.997339
SL005205	NKp30	-0.030256	-0.207557	0.147045	0.738031	0	0.562072	0.995222	0.00799405	-0.172411	0.188399	0.930791	0.997339
SL004639	TrkC	0.0641657	-0.312081	0.440413	0.738187	0.743099	0.0485007	0.995222	0.108392	-0.192944	0.409729	0.480804	0.993301
SL010513	PRKACA	0.0795531	-0.38791	0.547016	0.738721	0.833748	0.0141852	0.995222	0.0832003	-0.36304	0.52944	0.71479	0.993301
SL005181	IL-20 Ra	0.0377624	-0.187195	0.262719	0.742149	0.321984	0.224576	0.995222	0.0433684	-0.202107	0.288844	0.729141	0.997339
SL010617	TPSB2	0.0296676	-0.147307	0.206642	0.742486	0	0.386903	0.995222	0.0347176	-0.145775	0.21521	0.706176	0.993301
SL010457	DLL4	0.0818458	-0.406602	0.570293	0.742596	0.846089	0.010804	0.995222	0.0585241	-0.412074	0.529122	0.80743	0.997339
SL000383	CK-MM	-0.0294887	-0.205738	0.14676	0.742967	0	0.962474	0.995222	0.0117729	-0.167523	0.191069	0.8976	0.997339
SL016567	TAK1-TAB1	0.0294632	-0.147334	0.206261	0.74395	0	0.378302	0.995222	0.00117672	-0.178883	0.181236	0.98978	0.997339
SL008421	ATS1	-0.0289732	-0.203579	0.145632	0.745009	0	0.531988	0.995222	-0.0280869	-0.206157	0.149984	0.757212	0.997339
SL000252	a2-Macroglobulin	-0.0401048	-0.281986	0.201777	0.745205	0.405004	0.194834	0.995222	0.0334537	-0.145282	0.21219	0.713736	0.993301
SL004492	TLR2	-0.029276	-0.206547	0.147995	0.746177	0	0.694212	0.995222	-0.0597829	-0.240151	0.120585	0.515931	0.993301
SL000597	TNF-b	0.0283472	-0.145222	0.201917	0.748893	0	0.441079	0.995222	0.0268969	-0.150093	0.203887	0.765815	0.997339
SL007284	CRIS3	0.0305219	-0.157376	0.21842	0.750202	0.104996	0.290498	0.995222	0.0701597	-0.160909	0.301228	0.551772	0.993301
SL000566	RBP	0.0312336	-0.161093	0.22356	0.75026	0.117942	0.286985	0.995222	0.10295	-0.140059	0.345959	0.406349	0.993301
SL005214	Semaphorin-6A	0.0438436	-0.226342	0.31403	0.750449	0.512361	0.152137	0.995222	-0.0771225	-0.302472	0.148227	0.502369	0.993301
SL000542	gpIIbIIIa	-0.0287049	-0.205706	0.148296	0.750595	0	0.526765	0.995222	-0.0785986	-0.258493	0.101296	0.39181	0.993301
SL010505	MATK	0.110879	-0.573633	0.795391	0.750879	0.921897	0.000345951	0.995222	0.0867632	-0.508256	0.681782	0.775036	0.997339
SL003328	Factor I	0.0284763	-0.148144	0.205097	0.752001	0	0.319758	0.995222	-0.0466148	-0.225251	0.132021	0.609036	0.993301
SL001880	IFN-b	0.0284597	-0.14892	0.20584	0.753167	0	0.41469	0.995222	-0.00141171	-0.182104	0.179281	0.987783	0.997339
SL004339	FGF-5	-0.0283199	-0.205599	0.14896	0.754206	0	0.716947	0.995222	-0.0508681	-0.231551	0.129815	0.58109	0.993301
SL003755	Mcl-1	0.0312691	-0.16577	0.228308	0.755773	0.154238	0.276875	0.995222	0.0583224	-0.138821	0.255465	0.562028	0.993301
SL000522	MMP-12	-0.0279846	-0.20501	0.14904	0.756686	0	0.512356	0.995222	-0.0447777	-0.225245	0.135689	0.626748	0.993301
SL004860	HTRA2	-0.0853802	-0.625656	0.454896	0.756763	0.876018	0.00451121	0.995222	-0.104624	-0.65576	0.446513	0.709844	0.993301
SL010528	UFM1	0.0792123	-0.424033	0.582458	0.757699	0.854483	0.00875552	0.995222	0.0355144	-0.430824	0.501853	0.881346	0.997339
SL005234	GDF-9	0.0278306	-0.149487	0.205148	0.758369	0	0.526227	0.995222	0.0173244	-0.1635	0.198149	0.851049	0.997339
SL004594	Troponin I, skeletal, fast twitch	0.027672	-0.149534	0.204878	0.759557	0	0.733467	0.995222	0.0707397	-0.109518	0.250998	0.441799	0.993301
SL006544	BGH3	-0.030942	-0.230076	0.168192	0.760713	0.17024	0.272291	0.995222	-0.00935634	-0.189322	0.17061	0.918838	0.997339
SL005222	SREC-II	-0.027168	-0.202757	0.148421	0.761695	0	0.505867	0.995222	-0.0157726	-0.194813	0.163268	0.862916	0.997339
SL006189	KIF23	0.0424935	-0.232492	0.317479	0.761987	0.52724	0.145839	0.995222	0.0284893	-0.270732	0.32771	0.851965	0.997339
SL003220	C3adesArg	-0.0272806	-0.204259	0.149697	0.762559	0	0.523076	0.995222	0.00510472	-0.175125	0.185335	0.95573	0.997339
SL003176	I-309	-0.026772	-0.203537	0.149993	0.766584	0	0.37213	0.995222	-0.0472298	-0.227384	0.132925	0.607371	0.993301
SL006268	NSF1C	0.0348034	-0.195087	0.264694	0.76668	0.387159	0.201462	0.995222	0.0308475	-0.203843	0.265538	0.796704	0.997339
SL009341	BASI	-0.0260072	-0.197819	0.145804	0.76671	0	0.607827	0.995222	-0.0439079	-0.218966	0.13115	0.623004	0.993301
SL009948	PLXB2	0.0443156	-0.250325	0.338956	0.768154	0.593845	0.116622	0.995222	-0.14092	-0.385788	0.103948	0.259343	0.993301
SL004805	Nectin-like protein 2	-0.0993246	-0.759964	0.561315	0.768244	0.916176	0.000552424	0.995222	-0.137776	-0.779423	0.503872	0.673867	0.993301
SL004010	SCF sR	0.0573263	-0.32591	0.440563	0.769384	0.751477	0.0448631	0.995222	0.05279	-0.298831	0.404411	0.768563	0.997339
SL004182	GV	0.0264765	-0.151095	0.204048	0.770105	0	0.457206	0.995222	0.0246721	-0.156393	0.205737	0.789418	0.997339
SL003800	Kallikrein 4	-0.0364898	-0.282439	0.20946	0.771215	0.413099	0.191783	0.995222	-0.0130243	-0.292084	0.266036	0.927115	0.997339
SL000573	SAP	-0.026177	-0.20296	0.150606	0.771648	0	0.701201	0.995222	-0.0598375	-0.239661	0.119986	0.514279	0.993301
SL003305	IL-2 sRa	-0.0325698	-0.253405	0.188266	0.772532	0.320066	0.22523	0.995222	-0.0135959	-0.194184	0.166992	0.882691	0.997339
SL005157	DC-SIGN	0.0394981	-0.229632	0.308628	0.773616	0.520755	0.148595	0.995222	0.0734141	-0.139713	0.286542	0.499592	0.993301
SL005204	NKG2D	0.0260317	-0.151536	0.203599	0.773857	0	0.68361	0.995222	-0.0240157	-0.204206	0.156175	0.793921	0.997339
SL006397	NRP1	0.0259051	-0.150882	0.202692	0.77396	0	0.849998	0.995222	0.0470675	-0.133069	0.227204	0.608571	0.993301
SL007250	PK3CG	0.0347632	-0.203569	0.273095	0.774969	0.38527	0.202156	0.995222	0.00920827	-0.223717	0.242133	0.938239	0.997339
SL004685	Persephin	-0.0258261	-0.203059	0.151407	0.775182	0	0.991555	0.995222	-0.0424193	-0.222887	0.138048	0.645018	0.993301
SL017128	LRRK2	-0.0256842	-0.202239	0.150871	0.775549	0	0.542523	0.995222	-0.0168795	-0.1969	0.163141	0.854191	0.997339
SL004689	WISP-1	-0.0254384	-0.202306	0.151429	0.778023	0	0.747928	0.995222	-0.0220368	-0.202414	0.15834	0.810757	0.997339
SL002782	Adrenomedullin	0.0381572	-0.227902	0.304217	0.778641	0.495526	0.159152	0.995222	0.0947278	-0.219345	0.408801	0.554422	0.993301
SL000398	Cytochrome P450 3A4	-0.0250778	-0.202294	0.152138	0.781508	0	0.517143	0.995222	-0.0523943	-0.232894	0.128106	0.569407	0.993301
SL009207	Dynactin subunit 2	0.030968	-0.187889	0.249825	0.781525	0.281912	0.237969	0.995222	0.0471136	-0.13364	0.227867	0.609444	0.993301
SL005215	Siglec-3	0.042567	-0.259171	0.344305	0.782166	0.602552	0.112692	0.995222	0.0436386	-0.23977	0.327047	0.762812	0.997339
SL010468	RGMB	-0.0600417	-0.48612	0.366036	0.7824	0.799467	0.0255426	0.995222	0.0300316	-0.342235	0.402298	0.874366	0.997339
SL004914	PPase	0.0247315	-0.152248	0.201711	0.784169	0	0.510683	0.995222	0.0700812	-0.109863	0.250025	0.445266	0.993301
SL004147	IL-10 Rb	0.024672	-0.151936	0.20128	0.784234	0	0.630807	0.995222	0.0257375	-0.154341	0.205816	0.779381	0.997339
SL008372	FLRT3	0.0454359	-0.280233	0.371105	0.784511	0.658003	0.0872713	0.995222	-0.0179541	-0.358894	0.322986	0.917794	0.997339
SL002803	PGP9.5	0.0647223	-0.399407	0.528852	0.784611	0.869048	0.00572019	0.995222	0.0848266	-0.351556	0.521209	0.703211	0.993301
SL008177	C1QBP	0.0246534	-0.152531	0.201838	0.785078	0	0.942765	0.995222	0.0328533	-0.147792	0.213499	0.721503	0.993301
SL004482	Endoglin	-0.0714478	-0.58865	0.445754	0.786579	0.862697	0.00696033	0.995222	-0.101097	-0.578258	0.376063	0.677949	0.993301
SL000344	Cathepsin D	-0.0243971	-0.201377	0.152583	0.787017	0	0.482223	0.995222	-0.0906613	-0.27005	0.088728	0.321909	0.993301
SL001905	Mesothelin	0.0237081	-0.150087	0.197503	0.789187	0	0.350913	0.995222	0.0502317	-0.126762	0.227226	0.578042	0.993301
SL009412	DKK3	-0.0301324	-0.251422	0.191157	0.789559	0.302677	0.231104	0.995222	0.0296167	-0.202913	0.262147	0.802869	0.997339
SL012188	EP15R	-0.0230001	-0.192057	0.146056	0.789737	0	0.652867	0.995222	-0.0190848	-0.191462	0.153292	0.828209	0.997339
SL004230	tau	0.0345812	-0.219832	0.288994	0.789924	0.452829	0.176413	0.995222	0.0226018	-0.222771	0.267974	0.856731	0.997339
SL000024	TF	-0.0240677	-0.201247	0.153111	0.790056	0	0.866351	0.995222	-0.0130041	-0.193677	0.167669	0.887815	0.997339
SL000507	Lymphotoxin a1/b2	-0.0796117	-0.66723	0.508006	0.790593	0.893284	0.00220483	0.995222	-0.0691443	-0.645339	0.507051	0.814055	0.997339
SL004101	SMAD2	0.0356466	-0.228143	0.299437	0.791121	0.492432	0.160429	0.995222	0.0210695	-0.219955	0.262094	0.863962	0.997339
SL004333	FGF-10	-0.0239514	-0.201472	0.153569	0.79144	0	0.350737	0.995222	-0.0170327	-0.227005	0.19294	0.873677	0.997339
SL004208	annexin I	0.0238291	-0.15305	0.200708	0.791744	0	0.91706	0.995222	0.0275451	-0.152769	0.207859	0.764629	0.997339
SL018938	SUMO3	-0.0328952	-0.277416	0.211626	0.792033	0.417774	0.190009	0.995222	-0.0370351	-0.258945	0.184875	0.74359	0.997339
SL008623	CNTN2	0.047251	-0.305774	0.400276	0.793065	0.705027	0.0655872	0.995222	-0.00765238	-0.321415	0.30611	0.961874	0.997339
SL006230	Lumican	-0.0235951	-0.199978	0.152788	0.793177	0	0.849024	0.995222	-0.0134596	-0.193327	0.166408	0.883396	0.997339
SL005223	TCCR	-0.0488104	-0.413813	0.316192	0.793245	0.726989	0.0556382	0.995222	-0.109431	-0.464273	0.24541	0.545549	0.993301
SL000441	HGF	-0.0563333	-0.479122	0.366455	0.793977	0.793787	0.0276566	0.995222	-0.0559112	-0.458097	0.346275	0.78526	0.997339
SL003331	MMP-16	0.0296411	-0.194181	0.253463	0.795202	0.307363	0.229532	0.995222	0.0498298	-0.158815	0.258475	0.639721	0.993301
SL010379	Semaphorin 3A	-0.0234151	-0.200224	0.153394	0.795202	0	0.731847	0.995222	-0.0366174	-0.216777	0.143542	0.690363	0.993301
SL004360	Neurotrophin-5	0.0588316	-0.385546	0.503209	0.795264	0.811724	0.0211869	0.995222	0.0929249	-0.38924	0.57509	0.705629	0.993301
SL005212	Prolactin Receptor	0.0417971	-0.276427	0.360021	0.796846	0.641303	0.0949803	0.995222	0.0531045	-0.290563	0.396772	0.761997	0.997339
SL007361	LPPL	-0.0231654	-0.200326	0.153995	0.797732	0	0.984366	0.995222	-0.0223419	-0.203011	0.158327	0.808491	0.997339
SL012469	GPC5	0.0684367	-0.455072	0.591945	0.797781	0.867662	0.00597967	0.995222	0.0288106	-0.393615	0.451236	0.89366	0.997339
SL010458	Endocan	-0.0229574	-0.200031	0.154116	0.799412	0	0.484412	0.995222	0.0294014	-0.150479	0.209282	0.748699	0.997339
SL006970	DLL1	0.0227376	-0.153074	0.198549	0.799896	0	0.498876	0.995222	0.0340116	-0.145232	0.213255	0.709964	0.993301
SL003990	FGFR-2	-0.0316108	-0.276441	0.213219	0.800224	0.412759	0.191912	0.995222	-0.0347621	-0.313251	0.243727	0.806727	0.997339
SL011073	XPNPEP1	0.0225954	-0.153848	0.199038	0.801819	0	0.548913	0.995222	-0.0309638	-0.210124	0.148197	0.734809	0.997339
SL000674	FST	0.0226136	-0.154378	0.199605	0.802264	0	0.35048	0.995222	0.0124963	-0.206826	0.231819	0.911083	0.997339
SL018891	DSCAM	-0.0225711	-0.199845	0.154703	0.802936	0	0.428591	0.995222	-0.0939776	-0.273176	0.0852209	0.304011	0.993301
SL009431	HINT1	0.0224502	-0.154459	0.19936	0.803574	0	0.802736	0.995222	-0.00341253	-0.183304	0.176479	0.970341	0.997339
SL004345	GDF-11	0.0223772	-0.154975	0.199729	0.80468	0	0.430883	0.995222	-0.00588753	-0.186505	0.17473	0.949059	0.997339
SL011532	ETHE1	-0.0222742	-0.199324	0.154775	0.805234	0	0.904972	0.995222	-0.00109091	-0.181551	0.179369	0.990547	0.997339
SL011709	PLPP	0.0253157	-0.17744	0.228071	0.806675	0.186729	0.267484	0.995222	0.0234367	-0.173478	0.220351	0.815548	0.997339
SL004642	ADAM 9	-0.0220861	-0.199612	0.15544	0.807355	0	0.370393	0.995222	-0.0251585	-0.206587	0.15627	0.785786	0.997339
SL009216	dopa decarboxylase	0.0220383	-0.155412	0.199489	0.807684	0	0.692406	0.995222	0.0102933	-0.17066	0.191247	0.911228	0.997339
SL000462	IGFBP-1	0.0219264	-0.154827	0.198679	0.8079	0	0.796662	0.995222	0.0416639	-0.138455	0.221783	0.650285	0.993301
SL003951	BDNF	0.0292041	-0.2067	0.265108	0.808287	0.37254	0.206794	0.995222	0.059279	-0.143842	0.2624	0.567323	0.993301
SL005308	PSME3	-0.0218433	-0.198757	0.155071	0.808785	0	0.600631	0.995222	-0.0367046	-0.217067	0.143658	0.689995	0.993301
SL006131	FABPL	-0.021839	-0.198745	0.155067	0.808814	0	0.645701	0.995222	-0.00576984	-0.1861	0.17456	0.949997	0.997339
SL007145	NR1D1	0.0302583	-0.21557	0.276087	0.809364	0.414424	0.191281	0.995222	0.0009929	-0.17963	0.181616	0.991404	0.997339
SL002662	Coagulation Factor XI	0.0546461	-0.389536	0.498828	0.809457	0.818451	0.0189279	0.995222	0.0408533	-0.438093	0.519799	0.867227	0.997339
SL004155	PDGF Rb	0.021748	-0.155393	0.198889	0.809842	0	0.628028	0.995222	0.0124818	-0.168168	0.193132	0.892279	0.997339
SL004146	IL-1 R4	0.0216144	-0.154721	0.19795	0.810141	0	0.35779	0.995222	-0.00360341	-0.185638	0.178431	0.969051	0.997339
SL000322	C6	-0.0213504	-0.195899	0.153199	0.810533	0	0.972045	0.995222	-0.0440439	-0.221809	0.133721	0.627244	0.993301
SL014229	CD83	-0.050786	-0.469344	0.367772	0.812026	0.791232	0.0286254	0.995222	-0.0408899	-0.480787	0.399007	0.855437	0.997339
SL006132	Lamin-B1	-0.0215093	-0.198835	0.155816	0.812082	0	0.646435	0.995222	-0.0122552	-0.19308	0.16857	0.894325	0.997339
SL003792	GRB2 adapter protein	0.0301442	-0.220353	0.280641	0.813543	0.443298	0.180161	0.995222	0.0174962	-0.209644	0.244637	0.879998	0.997339
SL011071	PDGF-CC	0.0487866	-0.357393	0.454967	0.813888	0.778909	0.0334416	0.995222	0.0356413	-0.390089	0.461371	0.869665	0.997339
SL004078	BMP-7	-0.0447016	-0.423634	0.334231	0.81715	0.74668	0.0469387	0.995222	-0.0630836	-0.371696	0.245529	0.688687	0.993301
SL004357	Myostatin	-0.0206152	-0.197713	0.156483	0.819529	0	0.866753	0.995222	-0.0350818	-0.215554	0.14539	0.703206	0.993301
SL007237	MP2K4	-0.026072	-0.25016	0.198016	0.819618	0.319417	0.225452	0.995222	0.0585246	-0.120127	0.237177	0.520832	0.993301
SL005392	Arylsulfatase A	0.0321615	-0.246665	0.310988	0.821144	0.54023	0.14027	0.995222	0.0429032	-0.263113	0.34892	0.783482	0.997339
SL005197	LIMP II	0.0204298	-0.156973	0.197833	0.821426	0	0.567975	0.995222	-0.00444049	-0.185184	0.176303	0.961595	0.997339
SL008063	PPAC	0.0202439	-0.15646	0.196947	0.822336	0	0.596436	0.995222	0.0237314	-0.156489	0.203952	0.796338	0.997339
SL000280	GOT1	-0.0202023	-0.196585	0.156181	0.822378	0	0.899736	0.995222	-0.0062099	-0.18548	0.17306	0.945871	0.997339
SL004141	Ephrin-A5	-0.0357263	-0.347704	0.276252	0.82241	0.629227	0.100533	0.995222	-0.00057668	-0.253385	0.252231	0.996433	0.998941
SL005229	ULBP-3	-0.0231725	-0.225827	0.179482	0.822671	0.184044	0.268273	0.995222	-0.00061256	-0.223435	0.22221	0.995701	0.998941
SL004066	GIIE	-0.0199219	-0.197345	0.157501	0.825813	0	0.882391	0.995222	-0.0188303	-0.199793	0.162133	0.838395	0.997339
SL005178	IL-1F7	0.0196607	-0.156391	0.195713	0.826743	0	0.613077	0.995222	-0.00138246	-0.180591	0.177826	0.987937	0.997339
SL000408	Epo	0.0436622	-0.348807	0.436132	0.827393	0.762494	0.0401763	0.995222	0.0173031	-0.358841	0.393448	0.928159	0.997339
SL011808	CPNE1	-0.0197016	-0.196834	0.157431	0.827432	0	0.537126	0.995222	-0.0115542	-0.192026	0.168918	0.900143	0.997339
SL003341	Fibrinogen g-chain dimer	0.0217892	-0.175257	0.218835	0.828418	0.160528	0.275083	0.995222	0.0373364	-0.142149	0.216822	0.683487	0.993301
SL014288	MO2R1	-0.0490115	-0.494969	0.396946	0.829453	0.817986	0.019081	0.995222	-0.0853116	-0.53963	0.369007	0.712843	0.993301
SL004364	TACI	0.0193838	-0.157555	0.196322	0.829989	0	0.646806	0.995222	0.0309575	-0.149289	0.211204	0.7364	0.997339
SL000470	IL-11	-0.0206946	-0.21101	0.169621	0.831231	0.106362	0.290129	0.995222	-0.0122841	-0.205333	0.180765	0.900748	0.997339
SL000506	Luteinizing hormone	0.0191542	-0.157759	0.196067	0.831948	0	0.546558	0.995222	0.0650888	-0.114534	0.244711	0.477567	0.993301
SL007221	STAT3	-0.0191492	-0.196081	0.157783	0.832009	0	0.641684	0.995222	-0.0281386	-0.208571	0.152293	0.759864	0.997339
SL016969	CSRP3	0.0190821	-0.157776	0.19594	0.83252	0	0.491852	0.995222	0.0121879	-0.168154	0.192529	0.894621	0.997339
SL004297	NEUREGULIN-1	-0.0191467	-0.196705	0.158412	0.832615	0	0.376928	0.995222	4.59096e-05	-0.196505	0.196597	0.999635	0.999865
SL008380	CATZ	-0.0507985	-0.522346	0.420749	0.832777	0.838518	0.0128283	0.995222	-0.0906266	-0.575978	0.394725	0.714386	0.993301
SL000038	MCP-1	0.0264334	-0.218984	0.27185	0.832806	0.435563	0.183175	0.995222	0.0269528	-0.220729	0.274635	0.831106	0.997339
SL005217	Siglec-6	-0.0371793	-0.383812	0.309453	0.833494	0.693347	0.0709451	0.995222	-0.0693269	-0.394854	0.2562	0.676379	0.993301
SL006777	FETUB	0.0187585	-0.156495	0.194012	0.833834	0	0.858793	0.995222	0.0095815	-0.168911	0.188074	0.916208	0.997339
SL003197	TECK	0.0186817	-0.157901	0.195265	0.835732	0	0.884895	0.995222	-0.0331356	-0.212478	0.146207	0.717257	0.993301
SL004782	TSG-6	0.0186139	-0.15815	0.195378	0.836485	0	0.740788	0.995222	0.0295825	-0.150651	0.209816	0.747683	0.997339
SL005189	IL-7 Ra	0.0287351	-0.245035	0.302505	0.83701	0.520182	0.148838	0.995222	0.0408241	-0.256696	0.338345	0.78798	0.997339
SL005797	PIGR	0.0183609	-0.157413	0.194135	0.837781	0	0.840413	0.995222	-0.0216197	-0.200456	0.157216	0.812702	0.997339
SL005059	TGF-b R III	0.0253448	-0.219381	0.270071	0.839149	0.415891	0.190725	0.995222	0.131328	-0.0466963	0.309352	0.148216	0.953592
SL005629	NAGK	-0.0181883	-0.195436	0.159059	0.840603	0	0.709783	0.995222	0.0228064	-0.157534	0.203147	0.80424	0.997339
SL000027	COX-2	0.017932	-0.15715	0.193014	0.840901	0	0.888742	0.995222	-0.00259281	-0.18104	0.175854	0.977281	0.997339
SL000537	PDGF-BB	0.0179909	-0.158454	0.194436	0.841602	0	0.966619	0.995222	0.0257873	-0.154159	0.205734	0.778807	0.997339
SL005179	IL-1F8	0.0180787	-0.159246	0.195404	0.841619	0	0.397157	0.995222	0.0013851	-0.179265	0.182035	0.98801	0.997339
SL004466	Heparin cofactor II	0.0324641	-0.287352	0.35228	0.842299	0.646929	0.0923865	0.995222	0.00148965	-0.312861	0.315841	0.992589	0.997598
SL000546	PRL	-0.0418402	-0.455396	0.371716	0.842816	0.784679	0.0311582	0.995222	-0.00212831	-0.393537	0.38928	0.991497	0.997339
SL008773	CD109	0.0241687	-0.21626	0.264597	0.84381	0.399036	0.197065	0.995413	-0.0349265	-0.212361	0.142508	0.699643	0.993301
SL000509	Lymphotoxin b R	0.0175295	-0.159299	0.194358	0.845943	0	0.495274	0.996656	0.00502691	-0.175272	0.185326	0.956421	0.997339
SL014008	FUT5	-0.0173931	-0.193952	0.159165	0.846896	0	0.811658	0.996656	-0.0158215	-0.195884	0.164241	0.863267	0.997339
SL004142	Ephrin-B3	-0.0173832	-0.194391	0.159625	0.847366	0	0.452264	0.996656	0.00767715	-0.172705	0.188059	0.93352	0.997339
SL000057	Thymidine kinase	0.017288	-0.160189	0.194765	0.848589	0	0.997536	0.997113	0.0359185	-0.144979	0.216816	0.697155	0.993301
SL004258	Adiponectin	-0.0310987	-0.353071	0.290873	0.84985	0.650723	0.0906351	0.997288	0.055871	-0.238405	0.350147	0.709805	0.993301
SL010492	CAMK2B	0.0278378	-0.262094	0.31777	0.850731	0.60988	0.109369	0.997288	0.0300439	-0.260401	0.320488	0.839338	0.997339
SL000316	C4	-0.0167443	-0.192623	0.159134	0.851978	0	0.372993	0.997288	-0.00346876	-0.182547	0.17561	0.969716	0.997339
SL005219	Siglec-9	0.0160109	-0.160274	0.192296	0.858714	0	0.563313	0.997288	-0.00513915	-0.184809	0.17453	0.955293	0.997339
SL006918	MK01	-0.0262566	-0.315563	0.26305	0.858817	0.566643	0.128746	0.997288	-0.0278544	-0.319855	0.264147	0.851689	0.997339
SL000145	IL-1 sRII	-0.0265938	-0.31984	0.266652	0.858923	0.58335	0.121328	0.997288	-0.117664	-0.407354	0.172025	0.425982	0.993301
SL004353	IL-17D	-0.0159804	-0.192929	0.160968	0.859503	0	0.394542	0.997288	-0.00451825	-0.184955	0.175918	0.960856	0.997339
SL004844	EphA5	0.0159927	-0.161192	0.193177	0.859581	0	0.709932	0.997288	0.00808393	-0.172607	0.188774	0.930125	0.997339
SL005730	cGMP-stimulated PDE	0.0159267	-0.160688	0.192541	0.859709	0	0.39333	0.997288	-0.0137623	-0.193628	0.166103	0.880792	0.997339
SL004752	DRR1	-0.0152023	-0.184004	0.153599	0.859889	0	0.523733	0.997288	-0.0271523	-0.199057	0.144753	0.756884	0.997339
SL007003	DHH	-0.0156863	-0.193065	0.161692	0.862394	0	0.793382	0.997288	-0.00860362	-0.189481	0.172273	0.925723	0.997339
SL003308	IL-4 sR	0.0155642	-0.160783	0.191912	0.862664	0	0.563089	0.997288	-0.0110581	-0.29547	0.273353	0.939257	0.997339
SL004760	PAFAH beta subunit	0.0193657	-0.201913	0.240645	0.863806	0.316006	0.226612	0.997288	0.047133	-0.189259	0.283524	0.695954	0.993301
SL010375	ASAH2	0.0174346	-0.182426	0.217295	0.864243	0.1691	0.27262	0.997288	-0.0870094	-0.263888	0.0898689	0.334976	0.993301
SL000525	MMP-7	-0.0152858	-0.191718	0.161146	0.86516	0	0.553317	0.997288	0.0123151	-0.167405	0.192035	0.893162	0.997339
SL003043	TIMP-3	-0.0152643	-0.19182	0.161291	0.865442	0	0.423109	0.997288	-0.0205731	-0.200575	0.159429	0.822748	0.997339
SL003653	phosphoglycerate kinase 1	-0.0148871	-0.191297	0.161523	0.86863	0	0.695895	0.997288	0.0138493	-0.165672	0.193371	0.879816	0.997339
SL004156	TRAIL R1	0.0149611	-0.162404	0.192326	0.868687	0	0.401325	0.997288	-0.0167645	-0.197387	0.163858	0.85565	0.997339
SL017188	GSK-3 alpha/beta	0.0148156	-0.161281	0.190912	0.869024	0	0.710851	0.997288	-0.00828787	-0.187755	0.17118	0.927881	0.997339
SL003186	Lymphotactin	0.0147789	-0.16247	0.192028	0.870188	0	0.597478	0.997288	0.011748	-0.168996	0.192492	0.898628	0.997339
SL004867	Carbonic anhydrase III	-0.0146526	-0.191488	0.162183	0.870989	0	0.46527	0.997288	0.0388352	-0.14072	0.21839	0.671629	0.993301
SL001691	FGF7	-0.0216754	-0.286081	0.24273	0.872351	0.48901	0.161836	0.997288	-0.00560989	-0.280983	0.269764	0.96815	0.997339
SL011068	IL-17 RC	0.0210594	-0.239139	0.281258	0.87396	0.473778	0.16804	0.997288	0.0419429	-0.194647	0.278533	0.728242	0.997339
SL004152	IL-18 Ra	-0.0141433	-0.190737	0.16245	0.875267	0	0.89969	0.997288	-0.149983	-0.325243	0.025277	0.0934864	0.94365
SL000133	MIP-3a	-0.0139876	-0.190816	0.162841	0.876791	0	0.97063	0.997288	-0.022609	-0.202944	0.157726	0.805895	0.997339
SL003650	Alpha enolase	0.0222704	-0.263535	0.308076	0.878617	0.559137	0.132047	0.997288	-0.0460176	-0.252442	0.160407	0.662163	0.993301
SL004625	ADAMTS-4	0.01379	-0.163497	0.191077	0.87883	0	0.994479	0.997288	0.0211499	-0.159346	0.201646	0.818355	0.997339
SL010529	UFC1	-0.0263669	-0.366744	0.314011	0.879324	0.69158	0.0717583	0.997288	0.00377074	-0.351335	0.358877	0.983396	0.997339
SL004901	Protein disulfide-isomerase	-0.013457	-0.1903	0.163386	0.881439	0	0.599394	0.997288	-0.00294622	-0.183231	0.177339	0.974448	0.997339
SL003974	Activated Protein C	0.0133715	-0.163451	0.190194	0.882173	0	0.943069	0.997288	-0.00156202	-0.181667	0.178543	0.986438	0.997339
SL014294	EPHAA	0.0132499	-0.163146	0.189646	0.882957	0	0.445971	0.997288	0.0151597	-0.164615	0.194934	0.868727	0.997339
SL004489	TLR4	-0.013277	-0.19023	0.163676	0.883085	0	0.912989	0.997288	0.00126571	-0.178949	0.18148	0.989017	0.997339
SL000020	Apo B	-0.0131409	-0.189756	0.163474	0.884056	0	0.856549	0.997288	0.0216166	-0.157884	0.201117	0.813408	0.997339
SL003177	sICAM-2	-0.0130863	-0.189802	0.163629	0.8846	0	0.994581	0.997288	-0.00847996	-0.188586	0.171626	0.926475	0.997339
SL007328	JAG1	-0.027668	-0.401508	0.346172	0.884666	0.741235	0.0493176	0.997288	-0.0980167	-0.417145	0.221112	0.547187	0.993301
SL003919	kallikrein 14	0.0130526	-0.163998	0.190103	0.885111	0	0.799799	0.997288	-0.00125147	-0.181741	0.179238	0.989157	0.997339
SL001761	Troponin I	-0.0130617	-0.190308	0.164185	0.885158	0	0.440133	0.997288	0.0102746	-0.170275	0.190824	0.911191	0.997339
SL011628	DBNL	-0.0130074	-0.190041	0.164026	0.885495	0	0.933295	0.997288	-0.0171651	-0.19752	0.16319	0.852023	0.997339
SL000062	PSA	-0.0130007	-0.190167	0.164165	0.885638	0	0.755125	0.997288	-0.00791088	-0.188497	0.172675	0.931578	0.997339
SL013488	CLC1B	-0.0165336	-0.242113	0.209045	0.885774	0.322967	0.224239	0.997288	-0.0109253	-0.22026	0.198409	0.918525	0.997339
SL010494	CDK1/cyclin B	-0.0129861	-0.190491	0.164519	0.885982	0	0.580133	0.997288	-0.00991186	-0.190933	0.171109	0.914536	0.997339
SL017328	MYPC1	0.0195578	-0.248771	0.287887	0.886404	0.500709	0.157005	0.997288	-0.0179064	-0.250942	0.215129	0.880288	0.997339
SL014091	SORC2	0.0128086	-0.164546	0.190163	0.887436	0	0.69635	0.997288	-0.00126818	-0.18206	0.179524	0.989031	0.997339
SL000516	MCP-3	-0.0325322	-0.484502	0.419438	0.88781	0.821035	0.0180872	0.997288	-0.0230506	-0.460295	0.414194	0.917705	0.997339
SL004648	LIGHT	0.0127075	-0.164105	0.18952	0.887978	0	0.453383	0.997288	-0.00239293	-0.182611	0.177825	0.979238	0.997339
SL003738	B7	-0.0126864	-0.189927	0.164555	0.888432	0	0.533804	0.997288	-0.00968425	-0.190424	0.171055	0.916362	0.997339
SL001737	STRATIFIN	-0.0126098	-0.189476	0.164256	0.888867	0	0.482017	0.997288	-0.0307438	-0.210929	0.149442	0.738066	0.997339
SL000459	IgA	-0.012379	-0.189435	0.164677	0.891006	0	0.930513	0.997288	-0.0275265	-0.207977	0.152924	0.764956	0.997339
SL004925	AGR2	0.0123188	-0.165057	0.189694	0.891726	0	0.683518	0.997288	-0.0385073	-0.218679	0.141665	0.675294	0.993301
SL005703	Notch 1	0.0325368	-0.438232	0.503306	0.892247	0.83524	0.0137542	0.997288	0.0481228	-0.36233	0.458576	0.818253	0.997339
SL001992	TNF sR-I	-0.0221513	-0.345263	0.300961	0.893112	0.653982	0.0891298	0.997288	-0.023855	-0.344741	0.297031	0.884154	0.997339
SL010519	ZAP70	0.0120305	-0.164343	0.188404	0.893648	0	0.465511	0.997288	-0.0160547	-0.195738	0.163628	0.860983	0.997339
SL008810	NEGR1	0.0259512	-0.357829	0.409732	0.894563	0.750345	0.0453511	0.997288	0.0907758	-0.231373	0.412924	0.580754	0.993301
SL003332	MMP-17	-0.0118751	-0.189174	0.165423	0.895558	0	0.633553	0.997288	-0.0185952	-0.1994	0.16221	0.840249	0.997339
SL000002	VEGF	-0.0117044	-0.189102	0.165693	0.897109	0	0.842122	0.997288	-0.0448119	-0.225424	0.1358	0.626762	0.993301
SL008639	IDS	0.0116067	-0.165266	0.18848	0.897661	0	0.383828	0.997288	-0.00534348	-0.185348	0.174661	0.953604	0.997339
SL002731	Fas, soluble	0.0183945	-0.263008	0.299797	0.898056	0.547754	0.137013	0.997288	0.0141785	-0.262284	0.290641	0.919933	0.997339
SL005575	Fucosyltransferase 3	0.0113349	-0.165865	0.188534	0.900229	0	0.601871	0.997288	0.0124413	-0.168121	0.193004	0.892574	0.997339
SL004120	Discoidin domain receptor 2	-0.0112868	-0.187916	0.165343	0.900331	0	0.897393	0.997288	0.0385425	-0.140911	0.217996	0.673788	0.993301
SL002783	Cardiotrophin-1	0.0112145	-0.16624	0.188669	0.901424	0	0.973517	0.997288	0.0279738	-0.152945	0.208892	0.76185	0.997339
SL003733	SMAC	0.0138642	-0.207921	0.235649	0.902486	0.304084	0.230633	0.997288	0.0600422	-0.119913	0.239998	0.513149	0.993301
SL006675	CKAP2	-0.0109743	-0.187127	0.165178	0.902816	0	0.757105	0.997288	-0.0414025	-0.220725	0.13792	0.650892	0.993301
SL004724	MOZ	-0.0109013	-0.188187	0.166385	0.904073	0	0.605616	0.997288	-0.0386933	-0.219197	0.141811	0.674381	0.993301
SL005679	TCTP	0.0222979	-0.342776	0.387372	0.904713	0.728427	0.0549947	0.997288	0.00903359	-0.320587	0.338654	0.957162	0.997339
SL003334	EMAP-2	0.0128666	-0.198375	0.224108	0.904974	0.244892	0.249819	0.997288	0.028	-0.169154	0.225154	0.780739	0.997339
SL002646	MMP-14	0.0136141	-0.21212	0.239348	0.905904	0.33128	0.221381	0.997288	-0.00775236	-0.187287	0.171782	0.932554	0.997339
SL004771	Aurora kinase A	-0.0106337	-0.187511	0.166243	0.906202	0	0.334618	0.997288	-0.00364244	-0.183721	0.176436	0.968377	0.997339
SL005161	FGF-12	0.0106401	-0.166972	0.188252	0.906532	0	0.602732	0.997288	0.033818	-0.147156	0.214792	0.714178	0.993301
SL005358	prostatic binding protein	0.010589	-0.166176	0.187354	0.906535	0	0.955284	0.997288	-0.0268379	-0.206747	0.153072	0.769999	0.997339
SL000461	IgE	0.0102727	-0.166128	0.186673	0.909128	0	0.676388	0.997288	0.0256123	-0.154222	0.205446	0.780136	0.997339
SL004119	discoidin domain receptor 1	-0.0101065	-0.187329	0.167116	0.911005	0	0.676076	0.997288	0.0164641	-0.164069	0.196997	0.85814	0.997339
SL004908	Tropomyosin 2	0.00963039	-0.165966	0.185226	0.914398	0	0.43482	0.997288	0.00683867	-0.172199	0.185876	0.940323	0.997339
SL006993	MK13	0.0145342	-0.252008	0.281077	0.914889	0.509844	0.153193	0.997288	0.0143303	-0.264036	0.292696	0.919631	0.997339
SL007828	NRG4	-0.00932395	-0.185545	0.166897	0.917405	0	0.996685	0.997288	0.0105458	-0.169081	0.190173	0.908391	0.997339
SL008808	SKP1	0.00937418	-0.167893	0.186641	0.91745	0	0.483063	0.997288	0.00457877	-0.176143	0.1853	0.960395	0.997339
SL014029	SPHK2	0.00925478	-0.167784	0.186294	0.918393	0	0.86972	0.997288	0.0108449	-0.169706	0.191396	0.906284	0.997339
SL004649	OX40 Ligand	-0.00910741	-0.186412	0.168197	0.919808	0	0.332941	0.997288	0.0176728	-0.170924	0.20627	0.854279	0.997339
SL005235	NANOG	0.00906074	-0.168271	0.186392	0.92023	0	0.788067	0.997288	0.00488095	-0.175961	0.185723	0.957812	0.997339
SL000448	HSP 27	-0.00899822	-0.186033	0.168037	0.920646	0	0.428977	0.997288	-0.0127518	-0.193291	0.167787	0.889896	0.997339
SL004342	FGF-8B	0.00891231	-0.168378	0.186202	0.921514	0	0.40633	0.997288	0.00948585	-0.178586	0.197557	0.921253	0.997339
SL018946	UB2G2	-0.00857686	-0.179644	0.162491	0.92172	0	0.697196	0.997288	-0.043661	-0.217632	0.13031	0.6228	0.993301
SL009213	Cathepsin A	-0.00859862	-0.184462	0.167265	0.923655	0	0.924619	0.997288	-0.0124367	-0.191796	0.166922	0.891897	0.997339
SL005183	IL-22BP	-0.0132689	-0.286591	0.260053	0.924196	0.523569	0.147401	0.997288	-0.00527213	-0.215051	0.204507	0.960714	0.997339
SL002823	sL-Selectin	-0.0238085	-0.519986	0.472369	0.925072	0.851511	0.00945657	0.997288	0.00685959	-0.484765	0.498484	0.978183	0.997339
SL004477	calgranulin B	0.00834125	-0.168163	0.184845	0.926202	0	0.389397	0.997288	-0.0180855	-0.197831	0.16166	0.843666	0.997339
SL005153	CNTFR alpha	0.0282199	-0.569134	0.625574	0.926228	0.897505	0.00178685	0.997288	0.0599693	-0.455496	0.575435	0.819629	0.997339
SL000458	IFN-g R1	0.0115643	-0.236506	0.259634	0.9272	0.434752	0.183489	0.997288	-0.0196628	-0.199291	0.159966	0.830122	0.997339
SL010496	CDK5/p35	-0.0081728	-0.184318	0.167973	0.927542	0	0.349845	0.997288	-0.0159994	-0.195453	0.163455	0.861282	0.997339
SL001713	IL-17	-0.00813705	-0.184618	0.168344	0.927994	0	0.780977	0.997288	-0.00716043	-0.187089	0.172768	0.937829	0.997339
SL004157	TRAIL R2	0.015737	-0.332467	0.363941	0.929416	0.706022	0.0651328	0.997288	-0.0235397	-0.348523	0.301444	0.887106	0.997339
SL017610	Gro-b/g	0.00800948	-0.169488	0.185507	0.929525	0	0.702838	0.997288	0.0270239	-0.153916	0.207963	0.769731	0.997339
SL000360	Coagulation Factor X	-0.00786315	-0.183924	0.168197	0.930246	0	0.533143	0.997288	-0.022876	-0.202164	0.156412	0.802526	0.997339
SL004060	Endothelin-converting enzyme 1	0.00785131	-0.168642	0.184345	0.930521	0	0.410138	0.997288	0.0477091	-0.131897	0.227315	0.602626	0.993301
SL000415	Factor H	0.00784223	-0.169411	0.185096	0.930898	0	0.753744	0.997288	-0.0404329	-0.220447	0.139581	0.659772	0.993301
SL004209	annexin II	0.012612	-0.274028	0.299252	0.931278	0.56393	0.129941	0.997288	0.0288226	-0.269941	0.327586	0.850028	0.997339
SL014188	CD244	0.0077285	-0.169639	0.185096	0.931941	0	0.764407	0.997288	0.0341402	-0.146532	0.214813	0.711116	0.993301
SL016553	PDE3A	0.00913983	-0.201274	0.219554	0.932153	0.239289	0.251571	0.997288	-0.00985639	-0.275975	0.256263	0.942131	0.997339
SL005258	PLK-1	0.00736699	-0.167651	0.182385	0.934249	0	0.840216	0.997288	0.022636	-0.155787	0.201059	0.803628	0.997339
SL005208	Nogo Receptor	0.00712199	-0.168853	0.183097	0.936776	0	0.575698	0.997288	-0.0253314	-0.204497	0.153834	0.781695	0.997339
SL004849	IL-1 sR9	0.00713825	-0.169615	0.183891	0.93691	0	0.817697	0.997288	0.0306307	-0.149462	0.210723	0.738865	0.997339
SL011232	CDC37	-0.00700267	-0.184474	0.170469	0.938356	0	0.753463	0.997288	-0.00698433	-0.187795	0.173826	0.93965	0.997339
SL011530	DLRB1	0.00990926	-0.243122	0.262941	0.938817	0.449043	0.177907	0.997288	-0.0198121	-0.262868	0.223244	0.873069	0.997339
SL009988	ADAM12	-0.00681406	-0.182548	0.16892	0.939421	0	0.54231	0.997288	-0.06348	-0.241613	0.114653	0.48489	0.993301
SL003169	ENA-78	-0.00673492	-0.184175	0.170705	0.940698	0	0.49315	0.997288	-0.0298521	-0.210595	0.15089	0.746154	0.997339
SL010393	KREM2	0.00645173	-0.170981	0.183885	0.943185	0	0.944004	0.997288	-0.00556594	-0.18635	0.175218	0.951882	0.997339
SL007272	HXK2	-0.00641787	-0.183188	0.170352	0.943271	0	0.862815	0.997288	-0.0368994	-0.216852	0.143053	0.687763	0.993301
SL018625	TLR4:MD-2 complex	0.00615994	-0.170873	0.183193	0.945628	0	0.504861	0.997288	-0.00863252	-0.189089	0.171824	0.9253	0.997339
SL004984	14-3-3E	0.00606451	-0.170907	0.183036	0.946451	0	0.401411	0.997288	0.0229819	-0.157376	0.20334	0.802783	0.997339
SL017611	14-3-3	-0.00591341	-0.182695	0.170868	0.947727	0	0.505816	0.997288	-0.0244772	-0.204384	0.15543	0.789729	0.997339
SL004670	Artemin	-0.00588499	-0.183169	0.171399	0.948125	0	0.341397	0.997288	-0.00983869	-0.190651	0.170974	0.915067	0.997339
SL004349	IFN-lambda 2	0.0117665	-0.351714	0.375247	0.94941	0.71913	0.0591748	0.997288	0.0356331	-0.357648	0.428914	0.859051	0.997339
SL006911	CHK1	0.00570741	-0.171778	0.183192	0.949745	0	0.866937	0.997288	0.00523541	-0.175682	0.186153	0.95477	0.997339
SL004646	Layilin	0.00569313	-0.171655	0.183041	0.949832	0	0.383876	0.997288	0.0202455	-0.16053	0.201021	0.826259	0.997339
SL004306	UBC9	0.00942538	-0.294402	0.313252	0.951517	0.609637	0.10948	0.997288	-0.00883887	-0.277504	0.259826	0.948587	0.997339
SL005846	Moesin	-0.00547969	-0.182446	0.171487	0.951607	0	0.5543	0.997288	-0.0337568	-0.213979	0.146466	0.713535	0.993301
SL007049	CYTF	-0.00732424	-0.244852	0.230204	0.951808	0.380235	0.203998	0.997288	-0.0277982	-0.290297	0.234701	0.835575	0.997339
SL000617	ALT	-0.0052909	-0.182573	0.171991	0.953355	0	0.376508	0.997288	-0.0595346	-0.239545	0.120476	0.516846	0.993301
SL004016	CXCL16, soluble	-0.00576014	-0.199272	0.187752	0.953477	0.130529	0.283523	0.997288	0.0356632	-0.144123	0.21545	0.697434	0.993301
SL004742	Afamin	0.00576359	-0.188372	0.1999	0.953599	0.130802	0.283448	0.997288	-0.00628788	-0.189092	0.176516	0.94625	0.997339
SL010514	PTK6	-0.00521889	-0.182003	0.171565	0.95386	0	0.883299	0.997288	0.00799009	-0.172243	0.188223	0.93076	0.997339
SL001973	Mammaglobin 2	0.00513629	-0.171205	0.181477	0.954475	0	0.788403	0.997288	0.0667566	-0.112005	0.245518	0.464212	0.993301
SL000590	Thyroxine-Binding Globulin	0.00762983	-0.260657	0.275916	0.955549	0.503762	0.155735	0.997288	0.00282641	-0.266773	0.272426	0.983606	0.997339
SL013548	IL-34	-0.00495954	-0.180835	0.170916	0.955924	0	0.637596	0.997288	-0.01382	-0.19313	0.16549	0.879928	0.997339
SL000658	GAS1	-0.00495839	-0.182335	0.172419	0.956307	0	0.366986	0.997288	0.0293133	-0.151219	0.209846	0.750302	0.997339
SL004644	EDA	0.004932	-0.172223	0.182087	0.956485	0	0.877334	0.997288	0.0508162	-0.129266	0.230899	0.580217	0.993301
SL003302	MPIF-1	0.00472791	-0.171994	0.18145	0.958182	0	0.81748	0.997288	0.119171	-0.0570682	0.295411	0.18507	0.968167
SL010928	IMDH2	0.00465558	-0.171553	0.180864	0.958701	0	0.787881	0.997288	0.0523115	-0.126394	0.231017	0.566151	0.993301
SL006916	LCK	0.00457067	-0.172957	0.182099	0.959755	0	0.589749	0.997288	-0.0131788	-0.194035	0.167677	0.886431	0.997339
SL004183	P-Cadherin	-0.00449641	-0.181517	0.172525	0.960295	0	0.914173	0.997288	-1.55514e-05	-0.180498	0.180467	0.999865	0.999865
SL002542	K-ras	0.00460213	-0.180799	0.190004	0.961197	0.0936191	0.293545	0.997288	-0.00629353	-0.183997	0.17141	0.94466	0.997339
SL005196	LSAMP	0.0085914	-0.356967	0.37415	0.96326	0.724899	0.0565758	0.997288	0.0700174	-0.296637	0.436672	0.708196	0.993301
SL010369	Carbonic Anhydrase IV	-0.00390116	-0.179657	0.171855	0.9653	0	0.899784	0.997288	-0.00280947	-0.182069	0.17645	0.975495	0.997339
SL006197	DnaJ homolog	-0.00368547	-0.181104	0.173733	0.967524	0	0.739065	0.997288	0.00323061	-0.177694	0.184155	0.972082	0.997339
SL008759	GPVI	0.00459467	-0.216989	0.226179	0.967582	0.307707	0.229417	0.997288	-0.0026468	-0.233306	0.228013	0.982057	0.997339
SL003200	sTie-2	-0.00877585	-0.435684	0.418132	0.967862	0.798861	0.0257654	0.997288	-0.0386582	-0.383467	0.30615	0.826073	0.997339
SL008190	SPTA2	0.00358876	-0.173536	0.180714	0.968323	0	0.324818	0.997288	0.00378946	-0.17669	0.184269	0.967174	0.997339
SL004856	Desmoglein-1	-0.00352787	-0.180253	0.173197	0.96879	0	0.766818	0.997288	-0.031301	-0.211283	0.148681	0.733208	0.997339
SL007281	MK12	0.0063394	-0.324259	0.336938	0.97002	0.680021	0.0770899	0.997288	-0.0203036	-0.216627	0.17602	0.839372	0.997339
SL004690	WISP-3	-0.00379871	-0.206665	0.199067	0.970724	0.206292	0.261668	0.997288	-0.00682092	-0.198263	0.184621	0.944328	0.997339
SL019019	PIANP	-0.00330754	-0.180097	0.173482	0.970749	0	0.993928	0.997288	0.0344969	-0.145408	0.214402	0.707047	0.993301
SL000325	C9	0.00317348	-0.173768	0.180115	0.971958	0	0.705663	0.997288	0.0152122	-0.165218	0.195642	0.86875	0.997339
SL014088	FCRL3	0.00311836	-0.173341	0.179578	0.97237	0	0.883307	0.997288	-0.00608786	-0.185697	0.173521	0.947033	0.997339
SL010512	PIK3CA/PIK3R1	0.00339023	-0.190704	0.197484	0.97269	0.134193	0.282507	0.997288	-0.00824342	-0.226857	0.21037	0.941085	0.997339
SL005173	IL-10 Ra	0.00517653	-0.304684	0.315037	0.973879	0.623033	0.103371	0.997288	-0.000359484	-0.27891	0.278191	0.997982	0.999655
SL006915	IL-27	0.00867114	-0.521983	0.539325	0.974451	0.86766	0.00598	0.997288	0.0542313	-0.42193	0.530392	0.82336	0.997339
SL007752	DAPK2	-0.00290682	-0.184548	0.178734	0.974978	0.0393767	0.307591	0.997288	-0.0251279	-0.225209	0.174953	0.805567	0.997339
SL008590	Olfactomedin-4	0.00259935	-0.17401	0.179209	0.976987	0	0.617221	0.997288	0.0187669	-0.161295	0.198829	0.838138	0.997339
SL007869	PPIB	-0.00259012	-0.178995	0.173814	0.977042	0	0.370816	0.997288	-0.0243015	-0.204072	0.155469	0.791048	0.997339
SL008414	EphB6	0.00546695	-0.414484	0.425418	0.979644	0.791936	0.0283573	0.997288	0.0740485	-0.286512	0.434609	0.687302	0.993301
SL004133	BMP RII	0.0046427	-0.357621	0.366906	0.97996	0.717987	0.0596916	0.997288	0.0113659	-0.349188	0.37192	0.950734	0.997339
SL002539	OPG	0.00243152	-0.188122	0.192985	0.980047	0.111791	0.28866	0.997288	-0.0045683	-0.19698	0.187843	0.962885	0.997339
SL007429	GPNMB	0.00237105	-0.186677	0.191419	0.980388	0.0921452	0.293938	0.997288	-0.0483671	-0.228167	0.131432	0.598026	0.993301
SL003301	Ck-b-8-1	-0.00200383	-0.178438	0.17443	0.982241	0	0.339722	0.997288	0.0965237	-0.108051	0.301099	0.355091	0.993301
SL014308	FGF-8A	-0.00275463	-0.249489	0.24398	0.982542	0.421937	0.188422	0.997288	0.012452	-0.173335	0.198239	0.895489	0.997339
SL010490	CAMK1D	-0.00192224	-0.178585	0.17474	0.982986	0	0.844223	0.997288	-0.0256928	-0.205628	0.154243	0.779584	0.997339
SL004733	sLRP1	0.00298275	-0.283887	0.289852	0.983741	0.560782	0.131325	0.997288	0.0233424	-0.20189	0.248575	0.839037	0.997339
SL005170	ICOS	0.00176733	-0.17534	0.178875	0.984396	0	0.371842	0.997288	0.0182412	-0.162333	0.198816	0.843052	0.997339
SL000055	Cadherin E	-0.00169771	-0.178236	0.17484	0.984962	0	0.568324	0.997288	0.0071552	-0.172873	0.187183	0.937909	0.997339
SL003520	calreticulin	0.00170395	-0.175677	0.179085	0.984979	0	0.895615	0.997288	0.00394596	-0.176852	0.184744	0.96588	0.997339
SL005493	paraoxonase 1	0.00170322	-0.175791	0.179197	0.984995	0	0.765797	0.997288	0.0157838	-0.165136	0.196703	0.86423	0.997339
SL008381	CATF	-0.0016917	-0.178845	0.175461	0.985067	0	0.775554	0.997288	0.0364079	-0.143882	0.216698	0.692256	0.993301
SL003324	Coagulation Factor Xa	0.0015553	-0.174646	0.177756	0.986197	0	0.521479	0.997288	-0.0220533	-0.201353	0.157246	0.809501	0.997339
SL003280	HMG-1	0.00139695	-0.175023	0.177817	0.987618	0	0.367493	0.997288	-0.00526127	-0.185767	0.175244	0.954443	0.997339
SL004304	STX1a	-0.00139819	-0.178545	0.175749	0.987657	0	0.922908	0.997288	-0.0420195	-0.222242	0.138203	0.647692	0.993301
SL004301	Ku70	-0.00127936	-0.178176	0.175617	0.98869	0	0.666578	0.997288	-0.0423113	-0.222278	0.137655	0.644941	0.993301
SL000598	Tpo	0.0022864	-0.324641	0.329213	0.989064	0.658254	0.0871549	0.997288	-0.0530672	-0.342673	0.236538	0.719488	0.993301
SL002763	Kallikrein 11	0.00121698	-0.175478	0.177912	0.98923	0	0.380741	0.997288	0.0507898	-0.128653	0.230232	0.579064	0.993301
SL000021	Insulin	-0.00315264	-0.477693	0.471388	0.989611	0.836398	0.0134237	0.997288	-0.0680913	-0.449786	0.313603	0.726607	0.996895
SL010522	CDK8/cyclin C	-0.00114982	-0.177042	0.174742	0.989777	0	0.762647	0.997288	-0.0162007	-0.195533	0.163132	0.859461	0.997339
SL005102	SHBG	-0.00129292	-0.228403	0.225817	0.991097	0.336225	0.219669	0.997777	0.118998	-0.0730857	0.311083	0.224663	0.993301
SL014269	KI3L2	-0.000898019	-0.178132	0.176336	0.992076	0	0.896758	0.997922	-0.000592854	-0.181313	0.180127	0.99487	0.998941
SL007373	PPID	0.00075342	-0.174182	0.175689	0.993265	0	0.594334	0.998277	0.00559787	-0.172657	0.183853	0.950921	0.997339
SL003872	gp130, soluble	0.0012712	-0.341482	0.344024	0.9942	0.69679	0.0693625	0.998377	-0.0148152	-0.326486	0.296856	0.925771	0.997339
SL004924	eIF-4H	-0.000692655	-0.269213	0.267828	0.995966	0.509228	0.153451	0.998546	-0.0188811	-0.234502	0.19674	0.863731	0.997339
SL007696	C1QR1	-0.000673651	-0.318272	0.316925	0.996683	0.641315	0.094975	0.998546	0.0654244	-0.162479	0.293327	0.573674	0.993301
SL009054	NRX1B	-0.000446219	-0.356879	0.355987	0.998042	0.725001	0.0565299	0.998546	0.0455191	-0.333046	0.424085	0.81369	0.997339
SL006114	ROR1	0.000358787	-0.324599	0.325317	0.998273	0.657856	0.0873392	0.998546	0.0551214	-0.202209	0.312451	0.674606	0.993301
SL003753	DLC8	-0.000160076	-0.1723	0.17198	0.998546	0	0.627938	0.998546	0.00993863	-0.165429	0.185306	0.911555	0.997339

## Sheet: SIRD
SIRD
Unadjusted model									Adjusted model
Variable	Name	Effect	Lower	Upper	P-value	I2	Heterogeneity	P-value (FDR)	Effect	Lower	Upper	P-value	P-value (FDR)
SL000525	MMP-7	0.670216	0.540388	0.800044	4.59755e-24	0	0.476815	5.49407e-21	0.465478	0.262655	0.668301	6.85606e-06	0.000455167
SL005156	DAN	0.558151	0.426572	0.689731	9.2502e-17	0	0.525027	5.527e-14	0.423768	0.140977	0.706559	0.00331359	0.0416398
SL005789	Stanniocalcin-1	0.543908	0.412956	0.674861	3.93054e-16	0	0.798809	1.56567e-13	0.319924	0.0991649	0.540683	0.004506	0.0485106
SL003869	MIC-1	0.536933	0.404596	0.669269	1.83207e-15	0	0.860518	5.4733e-13	0.396168	0.241166	0.55117	5.45894e-07	6.87086e-05
SL008380	CATZ	0.536344	0.402919	0.669769	3.30808e-15	0.0311247	0.30966	7.49342e-13	0.247028	-0.154745	0.648801	0.228175	0.537808
SL005208	Nogo Receptor	0.528406	0.396687	0.660126	3.76239e-15	0	0.319619	7.49342e-13	0.106842	-0.400877	0.614561	0.680013	0.86876
SL000565	Renin	0.51711	0.384251	0.649969	2.37439e-14	0	0.510544	4.05343e-12	0.309017	0.0566931	0.56134	0.01638	0.109352
SL001992	TNF sR-I	0.51181	0.379142	0.644477	3.99343e-14	0	0.460338	5.96518e-12	0.206702	-0.276572	0.689976	0.401862	0.707254
SL000522	MMP-12	0.510483	0.377181	0.643785	6.10968e-14	0	0.630391	8.1123e-12	0.551135	0.394333	0.707937	5.61924e-12	6.71499e-09
SL009328	CSH	-0.505576	-0.638566	-0.372585	9.26473e-14	0	0.713379	1.10714e-11	-0.292712	-0.447616	-0.137809	0.000212539	0.0048843
SL007206	TSP2	0.492355	0.360399	0.624312	2.61189e-13	0	0.465083	2.83746e-11	0.144017	-0.165986	0.454021	0.36254	0.682261
SL012822	BSSP4	0.486215	0.355267	0.617162	3.40179e-13	0	0.761853	3.38761e-11	0.409492	0.255841	0.563144	1.75632e-07	3.78402e-05
SL005115	Spondin-1	0.488448	0.354853	0.622044	7.7233e-13	0.0141447	0.313864	7.0995e-11	0.471763	0.20543	0.738096	0.000517101	0.0095067
SL008631	DSC2	0.485384	0.351674	0.619094	1.11976e-12	0	0.82055	9.55797e-11	0.385304	0.126451	0.644158	0.00352947	0.0416398
SL003930	HPG-	-0.479853	-0.613023	-0.346683	1.63711e-12	0	0.704966	1.30423e-10	-0.240098	-0.541983	0.0617876	0.119041	0.376332
SL010928	IMDH2	-0.476591	-0.609095	-0.344087	1.79448e-12	0	0.930955	1.34025e-10	-0.216144	-0.368589	-0.0636996	0.00545362	0.0552294
SL008728	NRX3B	0.471824	0.339507	0.604141	2.76914e-12	0	0.569694	1.94654e-10	0.392166	0.0701563	0.714175	0.0169873	0.111538
SL007547	TIMD3	0.466726	0.334291	0.599162	4.94064e-12	0	0.49565	3.28003e-10	0.250266	-0.0775011	0.578032	0.134516	0.406955
SL004140	Ephrin-A4	0.464722	0.331065	0.598378	9.44163e-12	0	0.489507	5.93829e-10	0.340543	0.16877	0.512315	0.000102047	0.00296734
SL010450	CD48	0.453864	0.320155	0.587573	2.87314e-11	0	0.867409	1.7167e-09	0.361324	0.126983	0.595665	0.00251094	0.0337143
SL004686	TNFSF15	0.450541	0.316549	0.584534	4.39088e-11	0	0.352228	2.49862e-09	0.267519	-0.116089	0.651126	0.171678	0.465428
SL002654	Epithelial cell kinase	0.447513	0.313811	0.581214	5.37355e-11	0	0.709401	2.91882e-09	0.393815	0.202565	0.585065	5.43976e-05	0.00182954
SL007059	LY86	-0.4436	-0.57678	-0.31042	6.65173e-11	0	0.602146	3.314e-09	-0.173904	-0.540807	0.192999	0.3529	0.676182
SL004843	Ephrin-A2	0.443675	0.310471	0.57688	6.65573e-11	0	0.352911	3.314e-09	0.231844	-0.165846	0.629533	0.253199	0.571222
SL003653	phosphoglycerate kinase 1	-0.442053	-0.575966	-0.30814	9.80565e-11	0	0.747282	4.6871e-09	-0.254537	-0.411137	-0.0979372	0.00144393	0.0221218
SL004858	GFRa-1	0.435154	0.301382	0.568926	1.82146e-10	0	0.697944	8.2885e-09	0.15359	0.0025361	0.304644	0.0462756	0.218575
SL001800	TNF sR-II	0.557204	0.385798	0.72861	1.87272e-10	0.406766	0.194172	8.2885e-09	0.314943	-0.12955	0.759436	0.164917	0.458316
SL009324	FSTL3	0.690362	0.476491	0.904234	2.50583e-10	0.631153	0.099649	1.06945e-08	0.402062	-0.12872	0.932845	0.137636	0.411094
SL014248	SEM6B	0.426714	0.292755	0.560673	4.28474e-10	0	0.531088	1.76561e-08	0.314107	0.157087	0.471126	8.82675e-05	0.00263699
SL010390	URB	0.551911	0.378151	0.725671	4.8035e-10	0.413477	0.19164	1.91339e-08	0.501915	0.0810323	0.922798	0.0194228	0.119027
SL017424	GI24	-0.420519	-0.553962	-0.287077	6.55535e-10	0	0.928261	2.52698e-08	-0.287889	-0.444089	-0.13169	0.000303399	0.00625107
SL007179	EPHB2	0.421357	0.28704	0.555675	7.82437e-10	0	0.455001	2.92191e-08	0.243006	-0.0992839	0.585297	0.164086	0.457068
SL005230	UNC5H3	0.414793	0.280717	0.54887	1.33141e-09	0	0.403089	4.82132e-08	0.334252	-0.0841905	0.752693	0.117438	0.37225
SL006694	CNDP1	-0.419567	-0.55638	-0.282755	1.84745e-09	0.0491634	0.305115	6.47003e-08	-0.413956	-0.57059	-0.257322	2.2208e-07	3.79121e-05
SL003703	BFL1	-0.40888	-0.542299	-0.275461	1.89499e-09	0	0.985968	6.47003e-08	-0.186443	-0.340993	-0.0318923	0.0180586	0.115402
SL020171	HHLA2	-0.411208	-0.545555	-0.276861	1.98479e-09	0	0.764517	6.58839e-08	-0.217582	-0.5077	0.072535	0.141579	0.417746
SL000360	Coagulation Factor X	-0.406882	-0.539916	-0.273847	2.04115e-09	0	0.980226	6.59235e-08	-0.301298	-0.45732	-0.145276	0.000153747	0.0039091
SL003324	Coagulation Factor Xa	-0.403723	-0.536996	-0.270451	2.89677e-09	0	0.598338	8.95862e-08	-0.268152	-0.434434	-0.101871	0.00157384	0.0235093
SL006713	Collectin Kidney 1	0.4024	0.269531	0.535269	2.92374e-09	0	0.76342	8.95862e-08	0.131618	-0.0579503	0.321187	0.173573	0.468217
SL001777	Cystatin C	0.55919	0.374049	0.744331	3.22401e-09	0.482888	0.164342	9.63174e-08	0.404407	0.00726172	0.801553	0.0459555	0.217924
SL005087	IGFBP-7	0.397183	0.264497	0.52987	4.43853e-09	0	0.331777	1.29367e-07	0.29468	0.139685	0.449676	0.000194297	0.00455265
SL000427	Fractalkine/CX3CL-1	0.397404	0.263389	0.53142	6.17309e-09	0	0.913232	1.72566e-07	0.3986	0.240795	0.556406	7.39642e-07	8.0352e-05
SL003179	Integrin a1b1	0.397637	0.263519	0.531755	6.21172e-09	0	0.727195	1.72566e-07	0.148455	-0.00579155	0.302702	0.0592447	0.257445
SL010489	CAMK1	-0.399758	-0.534679	-0.264836	6.35389e-09	0	0.361133	1.72566e-07	-0.293244	-0.510894	-0.0755941	0.00827355	0.0687895
SL010468	RGMB	0.395747	0.26184	0.529654	6.93651e-09	0	0.563966	1.84203e-07	0.423317	0.0907818	0.755851	0.0125945	0.0929042
SL010501	MP2K2	0.396842	0.262195	0.53149	7.62533e-09	0	0.670134	1.98093e-07	0.346513	0.1881	0.504926	1.8091e-05	0.00102946
SL007804	BGN	0.390292	0.256388	0.524196	1.11166e-08	0	0.75691	2.82644e-07	0.290119	0.055224	0.525014	0.0154884	0.105764
SL004141	Ephrin-A5	0.389826	0.255612	0.52404	1.25031e-08	0	0.583486	3.11275e-07	0.318758	0.0823489	0.555168	0.00822523	0.0687895
SL008609	FCG3B	0.388613	0.254571	0.522655	1.32888e-08	0	0.577485	3.24085e-07	0.117034	-0.162898	0.396966	0.412544	0.718371
SL005403	Lectin, mannose-binding 2	-0.388363	-0.522661	-0.254066	1.44595e-08	0	0.598278	3.45582e-07	-0.260622	-0.598716	0.0774725	0.130827	0.401386
SL005166	Galectin-7	-0.38584	-0.519469	-0.25221	1.52105e-08	0	0.797793	3.56403e-07	-0.106731	-0.376287	0.162825	0.437719	0.730324
SL005699	Apo L1	-0.384753	-0.519054	-0.250453	1.96517e-08	0	0.991089	4.51612e-07	-0.303119	-0.473901	-0.132336	0.000503845	0.00940772
SL005764	sCD163	0.38448	0.249974	0.518985	2.1129e-08	0	0.763796	4.764e-07	0.141414	-0.0205969	0.303425	0.0871202	0.316439
SL000603	Trypsin	0.377499	0.244457	0.510542	2.67814e-08	0	0.57463	5.92663e-07	0.232325	0.0638908	0.40076	0.00686301	0.0630869
SL000403	Endostatin	0.438841	0.283985	0.593697	2.7876e-08	0.25709	0.245968	6.0567e-07	0.401895	0.0173387	0.786452	0.0405273	0.20326
SL003166	ALCAM	0.377467	0.244139	0.510795	2.87504e-08	0	0.555909	6.13513e-07	0.224139	0.0680839	0.380195	0.00487684	0.0511492
SL000048	Protein C	-0.374064	-0.506685	-0.241443	3.23567e-08	0	0.904788	6.78356e-07	-0.185486	-0.37986	0.00888759	0.0614358	0.26034
SL005172	IGFBP-6	0.377541	0.243234	0.511849	3.59825e-08	0	0.467689	7.41364e-07	0.344119	0.186176	0.502063	1.95238e-05	0.0010605
SL000280	GOT1	-0.376187	-0.510426	-0.241948	3.96159e-08	0	0.989509	8.02389e-07	-0.196196	-0.351835	-0.0405573	0.0134848	0.0953508
SL004814	Coactosin-like protein	-0.374803	-0.509348	-0.240259	4.76338e-08	0	0.728792	9.48707e-07	-0.186191	-0.343343	-0.0290395	0.0202255	0.122688
SL003733	SMAC	-0.374116	-0.508665	-0.239567	5.0447e-08	0	0.731386	9.76797e-07	-0.130263	-0.4296	0.169074	0.393703	0.702913
SL001945	sE-Selectin	0.372031	0.238212	0.50585	5.0679e-08	0	0.752535	9.76797e-07	0.112229	-0.0412461	0.265704	0.151793	0.438146
SL004915	NCC27	-0.37248	-0.506786	-0.238173	5.45926e-08	0	0.405412	1.03553e-06	-0.198961	-0.619514	0.221592	0.353799	0.676464
SL007328	JAG1	0.37117	0.237212	0.505127	5.61393e-08	0	0.776245	1.04823e-06	0.323238	0.0847374	0.561739	0.00789979	0.0684076
SL005195	LAG-3	0.370907	0.236585	0.505229	6.22942e-08	0	0.773934	1.14525e-06	0.332356	0.174367	0.490345	3.73777e-05	0.00153125
SL004579	Macrophage mannose receptor	0.382548	0.24353	0.521567	6.91358e-08	0.0716224	0.299336	1.25178e-06	0.263408	-0.0506068	0.577424	0.100157	0.345117
SL004920	Cofilin-1	-0.367284	-0.501627	-0.232941	8.39691e-08	0	0.322924	1.49766e-06	-0.226413	-0.640475	0.187649	0.283842	0.608961
SL003974	Activated Protein C	-0.429446	-0.586692	-0.272199	8.66345e-08	0.27018	0.241777	1.52247e-06	-0.30999	-0.751938	0.131958	0.169208	0.46377
SL017290	PolyUbiquitin K63	-0.36774	-0.502517	-0.232964	8.90235e-08	0	0.496164	1.54178e-06	-0.293498	-0.607652	0.0206568	0.0670872	0.274552
SL006119	TFF3	0.358661	0.226723	0.490598	9.9299e-08	0	0.809719	1.69518e-06	0.35361	0.19887	0.50835	7.50302e-06	0.000471901
SL009400	CRDL1	0.560981	0.353984	0.767978	1.0861e-07	0.586992	0.119698	1.82802e-06	0.686308	0.368362	1.00425	2.32952e-05	0.00114911
SL000532	ON	-0.364167	-0.49928	-0.229054	1.27333e-07	0	0.645548	2.11338e-06	-0.338373	-0.497528	-0.179218	3.0864e-05	0.00141856
SL000283	b2-Microglobulin	0.597038	0.375298	0.818778	1.31151e-07	0.642008	0.0946556	2.14693e-06	0.48649	0.187611	0.785368	0.0014214	0.0221218
SL012517	RSPO4	0.365574	0.229344	0.501804	1.44397e-07	0.0241732	0.31139	2.33181e-06	0.479161	0.258698	0.699625	2.04573e-05	0.00106289
SL010521	BTK	-0.359425	-0.493462	-0.225388	1.47457e-07	0	0.563783	2.34948e-06	-0.233438	-0.452748	-0.0141274	0.0369587	0.193614
SL012881	GPC6	-0.360193	-0.494668	-0.225717	1.52292e-07	0	0.730165	2.3946e-06	-0.247519	-0.497509	0.00247109	0.052308	0.235879
SL009948	PLXB2	0.356571	0.223222	0.489919	1.59793e-07	0	0.551188	2.47991e-06	0.281204	0.10627	0.456137	0.00162923	0.023743
SL005392	Arylsulfatase A	-0.356769	-0.491377	-0.222161	2.0498e-07	0	0.730815	3.1404e-06	-0.246644	-0.481716	-0.0115713	0.0397399	0.201226
SL010465	MATN2	0.352846	0.219501	0.486191	2.14525e-07	0	0.862471	3.24503e-06	0.346326	0.0395727	0.653079	0.0269108	0.153868
SL011499	PH	0.347442	0.213951	0.480933	3.37386e-07	0	0.429475	5.01719e-06	0.125434	-0.395184	0.646052	0.636771	0.852118
SL001996	Angiopoietin-2	0.37192	0.228982	0.514858	3.40077e-07	0.119218	0.286636	5.01719e-06	0.11269	-0.319885	0.545265	0.609639	0.830694
SL004362	SCGF-beta	0.391484	0.240933	0.542036	3.45884e-07	0.194431	0.265209	5.04062e-06	0.351449	0.065398	0.6375	0.0160376	0.108277
SL004747	ApoM	-0.348202	-0.482589	-0.213816	3.8069e-07	0	0.640179	5.48102e-06	0.0769009	-0.0710177	0.224819	0.308223	0.627534
SL008916	DPP2	-0.338646	-0.469505	-0.207787	3.93406e-07	0	0.428528	5.59667e-06	-0.190497	-0.370539	-0.0104543	0.0381006	0.196251
SL008176	PSME1	-0.345252	-0.479409	-0.211094	4.56091e-07	0	0.662421	6.4121e-06	-0.207759	-0.365049	-0.0504682	0.00963008	0.0762116
SL004811	Transgelin-2	-0.344638	-0.478709	-0.210568	4.69834e-07	0	0.586382	6.52851e-06	-0.119302	-0.415534	0.17693	0.429912	0.724669
SL005184	IL-23	0.349607	0.213488	0.485725	4.80418e-07	0.0185696	0.312775	6.59884e-06	0.138017	-0.209841	0.485876	0.436781	0.730324
SL007274	EFNB2	0.345124	0.210662	0.479587	4.88836e-07	0	0.34984	6.63816e-06	0.366499	0.0555983	0.6774	0.0208625	0.124653
SL000591	TIMP-1	0.344658	0.209787	0.479528	5.48164e-07	0	0.768271	7.36018e-06	0.153236	-0.0437246	0.350197	0.127294	0.396438
SL001973	Mammaglobin 2	-0.343859	-0.478603	-0.209115	5.68208e-07	0	0.703987	7.54454e-06	0.00573887	-0.147333	0.158811	0.941423	0.978261
SL001947	MIA	0.342875	0.208435	0.477315	5.77236e-07	0	0.674774	7.58018e-06	0.44258	0.173862	0.711298	0.00124629	0.0206558
SL002602	Trefoil factor 2	0.33916	0.206018	0.472302	5.95306e-07	0	0.693311	7.73251e-06	0.232429	0.0763043	0.388554	0.00352426	0.0416398
SL005171	IGFBP-4	0.340308	0.205762	0.474853	7.14563e-07	0	0.817028	9.13805e-06	0.0214489	-0.130727	0.173624	0.782353	0.916687
SL003722	PKB beta	-0.342299	-0.477664	-0.206935	7.18809e-07	0	0.65562	9.13805e-06	-0.221236	-0.379695	-0.0627776	0.00621048	0.0584372
SL004458	Elafin	0.409176	0.246735	0.571616	7.93325e-07	0.320826	0.224971	9.97919e-06	0.302012	-0.0406888	0.644714	0.0841213	0.308359
SL005152	TIG2	0.336112	0.201344	0.47088	1.01781e-06	0	0.986663	1.26696e-05	0.0489497	-0.105729	0.203628	0.535092	0.793232
SL004556	DAF	0.335429	0.200874	0.469984	1.0293e-06	0	0.504357	1.26806e-05	0.341281	0.0763353	0.606227	0.011581	0.0875902
SL008177	C1QBP	-0.335162	-0.470504	-0.19982	1.21199e-06	0	0.850948	1.47789e-05	-0.0807561	-0.409737	0.248225	0.630431	0.847652
SL003199	sTie-1	0.332604	0.19792	0.467287	1.29731e-06	0	0.369239	1.56595e-05	0.171401	-0.0887391	0.431541	0.196572	0.501931
SL003717	Caspase-10	-0.329788	-0.464722	-0.194854	1.66551e-06	0	0.699373	1.99028e-05	-0.165544	-0.322772	-0.00831514	0.0390539	0.199442
SL005174	IL-17B R	-0.328143	-0.462958	-0.193329	1.83661e-06	0	0.385333	2.17302e-05	-0.139036	-0.543075	0.265003	0.500024	0.770011
SL001938	Activin A	0.324053	0.190091	0.458016	2.12519e-06	0	0.556838	2.48981e-05	0.0414225	-0.164356	0.247201	0.693187	0.873128
SL001774	FABP	0.336404	0.197205	0.475604	2.17272e-06	0.0657872	0.300851	2.52078e-05	-0.112618	-0.260699	0.035463	0.136071	0.408555
SL010368	IDUA	0.324063	0.189465	0.458662	2.37168e-06	0	0.746214	2.72516e-05	0.212608	0.0547688	0.370447	0.00828928	0.0687895
SL003340	YKL-40	0.318212	0.185038	0.451386	2.82398e-06	0	0.408733	3.20758e-05	0.21631	0.00636231	0.426258	0.0434499	0.211018
SL007680	ROBO2	0.32247	0.187469	0.45747	2.84521e-06	0	0.753555	3.20758e-05	0.179294	0.00160505	0.356982	0.0479661	0.223904
SL004363	SCGF-alpha	0.365995	0.211955	0.520035	3.21132e-06	0.22763	0.255181	3.58648e-05	0.315402	0.0152758	0.615529	0.0394252	0.200481
SL010518	TEC	-0.317734	-0.453019	-0.182448	4.16047e-06	0	0.522333	4.60348e-05	-0.270246	-0.529212	-0.0112796	0.040822	0.20326
SL008623	CNTN2	0.317465	0.182016	0.452913	4.35289e-06	0	0.511882	4.7722e-05	0.336381	0.176856	0.495907	3.58293e-05	0.00152914
SL000323	C7	0.315324	0.180165	0.450482	4.81737e-06	0	0.888004	5.23342e-05	0.157898	0.000295845	0.315501	0.0495715	0.228718
SL005675	ATP synthase beta chain	-0.314007	-0.449256	-0.178759	5.35298e-06	0	0.805602	5.73352e-05	-0.202347	-0.361275	-0.0434185	0.0125809	0.0929042
SL002644	ERBB1	-0.311858	-0.44622	-0.177496	5.38687e-06	0	0.568699	5.73352e-05	-0.0746866	-0.23061	0.081237	0.347827	0.674052
SL002704	PTN	0.535513	0.304722	0.766304	5.42166e-06	0.665137	0.0839721	5.73352e-05	0.561944	0.132237	0.991651	0.0103737	0.0810234
SL010374	METAP1	-0.311384	-0.446248	-0.17652	6.03099e-06	0	0.477481	6.32196e-05	-0.150799	-0.446553	0.144955	0.317628	0.638999
SL000613	uPA	0.310313	0.175727	0.444898	6.21106e-06	0	0.715812	6.4541e-05	0.328515	0.170284	0.486747	4.7172e-05	0.0017082
SL011404	PDE4D	-0.310007	-0.444664	-0.17535	6.41486e-06	0	0.597334	6.60842e-05	-0.186193	-0.477955	0.105568	0.21101	0.518666
SL007502	ST4S6	0.309835	0.175054	0.444616	6.6196e-06	0	0.936998	6.76104e-05	0.332987	0.17445	0.491525	3.84413e-05	0.00153125
SL004438	Cystatin M	0.310116	0.174692	0.44554	7.18127e-06	0	0.608047	7.27256e-05	0.370926	0.211932	0.529921	4.81957e-06	0.000359961
SL003542	NG36	-0.302369	-0.436213	-0.168525	9.521e-06	0	0.952947	9.56101e-05	-0.0352702	-0.194838	0.124298	0.664854	0.862915
SL006998	PDPK1	-0.303809	-0.438643	-0.168975	1.00449e-05	0	0.919537	9.96457e-05	-0.19353	-0.3715	-0.01556	0.0330624	0.179589
SL014070	SLIK5	0.304369	0.169257	0.439481	1.00896e-05	0	0.727185	9.96457e-05	0.358998	0.0961457	0.62185	0.00743119	0.0662707
SL003327	Factor D	0.304111	0.168949	0.439273	1.03438e-05	0	0.46953	0.000101318	0.124015	-0.0324166	0.280446	0.12023	0.378796
SL004357	Myostatin	-0.303824	-0.439209	-0.168439	1.09024e-05	0	0.592292	0.000105922	-0.21871	-0.631817	0.194397	0.299429	0.625555
SL010500	LYNB	-0.302154	-0.436864	-0.167443	1.10175e-05	0	0.915714	0.000106177	-0.143336	-0.300699	0.0140279	0.0742213	0.290802
SL003300	HCC-4	0.302836	0.167378	0.438294	1.17714e-05	0	0.362423	0.000112535	0.10329	-0.0549729	0.261552	0.200839	0.506704
SL004626	ADAMTS-5	0.302639	0.166769	0.438509	1.26744e-05	0	0.870347	0.000120206	0.381528	0.221663	0.541392	2.90256e-06	0.000247754
SL008071	14-3-3 protein theta	-0.300628	-0.435692	-0.165564	1.28575e-05	0	0.645317	0.000120982	-0.192487	-0.490023	0.105048	0.204806	0.50928
SL004671	BAFF Receptor	-0.346879	-0.50413	-0.189628	1.53597e-05	0.257742	0.245761	0.000143398	-0.255556	-0.726722	0.215609	0.287751	0.614041
SL006917	LYN	-0.296391	-0.431057	-0.161725	1.60503e-05	0	0.804764	0.000148683	-0.158004	-0.315653	-0.000355845	0.0494851	0.228718
SL004781	CSK	-0.296267	-0.431183	-0.16135	1.67789e-05	0	0.843529	0.000154237	-0.202858	-0.361272	-0.0444435	0.0120787	0.0907803
SL004689	WISP-1	-0.294095	-0.429252	-0.158938	2.00103e-05	0	0.921143	0.000182475	-0.121814	-0.508555	0.264926	0.537008	0.793232
SL002785	N-terminal pro-BNP	0.419293	0.226525	0.612061	2.01562e-05	0.514535	0.151222	0.000182475	0.393777	0.0112791	0.776275	0.0436163	0.211018
SL014488	VAV	-0.293389	-0.42841	-0.158367	2.0552e-05	0	0.440113	0.000183978	-0.147654	-0.394056	0.0987474	0.240198	0.555809
SL006913	FYN	-0.292601	-0.427287	-0.157915	2.06302e-05	0	0.84846	0.000183978	-0.134739	-0.292317	0.0228395	0.0937606	0.33062
SL000055	Cadherin E	0.291045	0.156322	0.425768	2.2942e-05	0	0.66088	0.000203079	0.230454	0.0720938	0.388815	0.00434124	0.048035
SL002823	sL-Selectin	-0.295319	-0.43208	-0.158558	2.31312e-05	0.0269604	0.310698	0.000203248	-0.302785	-0.461371	-0.144198	0.000182484	0.00445038
SL002762	CgA	0.290145	0.15566	0.42463	2.35212e-05	0	0.690897	0.000205167	0.221969	0.0638488	0.38009	0.00593424	0.0571889
SL000550	PCI	0.290858	0.155966	0.42575	2.37748e-05	0	0.851418	0.000205876	0.254467	0.0957363	0.413197	0.00167746	0.0241513
SL003522	ERP29	0.287328	0.152582	0.422075	2.92338e-05	0	0.912031	0.000251327	0.0916738	-0.0649142	0.248262	0.251194	0.570418
SL002755	PAPP-A	0.287776	0.152639	0.422913	2.99594e-05	0	0.361545	0.000255725	0.246148	-0.11492	0.607216	0.1815	0.481482
SL004015	TAFI	-0.310313	-0.456824	-0.163802	3.30673e-05	0.147998	0.278641	0.000278892	-0.149852	-0.385584	0.0858801	0.212792	0.518666
SL004869	Carbonic anhydrase XIII	-0.285257	-0.419955	-0.15056	3.31403e-05	0	0.543873	0.000278892	-0.107332	-0.264852	0.0501877	0.181714	0.481482
SL003173	Gro-a	-0.285753	-0.420933	-0.150572	3.42666e-05	0	0.389811	0.000286353	-0.323872	-0.518051	-0.129693	0.00107917	0.018423
SL000519	MIP-1a	0.292981	0.154318	0.431644	3.4548e-05	0.042301	0.306854	0.0002867	0.183835	-0.132414	0.500083	0.254569	0.571993
SL004016	CXCL16, soluble	0.284317	0.149445	0.41919	3.60112e-05	0	0.390703	0.000295895	0.203704	-0.11082	0.518228	0.204302	0.50928
SL010516	SRCN1	-0.285129	-0.420416	-0.149842	3.61511e-05	0	0.541912	0.000295895	-0.152252	-0.310312	0.00580815	0.0590337	0.257445
SL002621	Midkine	0.284787	0.149517	0.420057	3.68547e-05	0	0.353078	0.000299601	0.232522	0.0491895	0.415854	0.0129247	0.0941771
SL013488	CLC1B	-0.284938	-0.42043	-0.149446	3.7594e-05	0	0.963544	0.000303546	-0.136259	-0.295038	0.0225196	0.0925722	0.32826
SL000250	a2-Antiplasmin	-0.28343	-0.418577	-0.148284	3.94872e-05	0	0.942755	0.000316693	-0.260641	-0.419731	-0.101551	0.00132248	0.0210714
SL005196	LSAMP	0.284179	0.148519	0.419838	4.03042e-05	0	0.517796	0.00032109	0.420952	0.262559	0.579346	1.89993e-07	3.78402e-05
SL018629	RNF43	-0.28388	-0.419462	-0.148297	4.06552e-05	0	0.847892	0.000321742	-0.315173	-0.474458	-0.155889	0.000105255	0.00296734
SL004635	CD30 Ligand	0.283179	0.147842	0.418516	4.11304e-05	0	0.489401	0.000323361	0.124434	-0.0340573	0.282925	0.123854	0.387448
SL010388	Trypsin 2	0.433767	0.225867	0.641667	4.32656e-05	0.587507	0.119468	0.000336737	0.21786	0.0138159	0.421903	0.0363783	0.191507
SL003329	HCC-1	0.378775	0.197201	0.560349	4.33954e-05	0.447655	0.178453	0.000336737	0.319464	0.00331668	0.635611	0.0476445	0.223275
SL007631	SOST	0.377366	0.195831	0.5589	4.61562e-05	0.447253	0.178611	0.00035585	0.526958	0.245867	0.80805	0.000238485	0.00518163
SL004101	SMAD2	-0.278145	-0.413137	-0.143152	5.38158e-05	0	0.847329	0.000412243	-0.192149	-0.350786	-0.0335115	0.0175966	0.113053
SL005188	IL-5 Ra	0.277223	0.141546	0.4129	6.20913e-05	0	0.863684	0.000472605	0.229064	0.0693505	0.388777	0.00493854	0.051256
SL004605	40S ribosomal protein SA	-0.277193	-0.412932	-0.141454	6.26899e-05	0	0.819939	0.000474142	-0.178673	-0.338207	-0.0191383	0.0281573	0.157972
SL003167	BLC	0.313478	0.157925	0.469032	7.82143e-05	0.24114	0.250993	0.000587837	0.240027	0.0817773	0.398277	0.00295099	0.0383309
SL000074	p53	-0.273261	-0.409061	-0.13746	8.01762e-05	0	0.613819	0.000595114	-0.219547	-0.379449	-0.0596456	0.0071226	0.0644811
SL004805	Nectin-like protein 2	0.29711	0.149457	0.444763	8.01786e-05	0.159208	0.27546	0.000595114	0.232627	0.0177852	0.447469	0.0338196	0.181231
SL008810	NEGR1	0.27207	0.136442	0.407697	8.43455e-05	0	0.483116	0.000618964	0.407701	0.199499	0.615903	0.000124039	0.00329393
SL004125	IR	0.271933	0.136366	0.4075	8.44278e-05	0	0.422744	0.000618964	0.225042	0.065554	0.38453	0.00568244	0.0553006
SL004863	TAJ	0.265954	0.132991	0.398916	8.84203e-05	0	0.655866	0.000644282	0.278779	0.122649	0.434908	0.000465899	0.00912703
SL005575	Fucosyltransferase 3	0.270692	0.134864	0.406521	9.38295e-05	0	0.868051	0.000679553	0.300308	0.14037	0.460247	0.000233118	0.00515882
SL004871	DR6	0.385925	0.19134	0.580509	0.000101387	0.521178	0.148416	0.000729357	0.288505	-0.17354	0.750549	0.22102	0.527359
SL000678	Granulysin	0.2687	0.133153	0.404248	0.000102202	0	0.387127	0.000729357	0.213147	0.053572	0.372722	0.00884578	0.0714237
SL007033	LTBP4	0.484361	0.239972	0.728749	0.000102537	0.70128	0.0673023	0.000729357	0.394979	-0.144795	0.934753	0.151515	0.438146
SL016567	TAK1-TAB1	-0.353528	-0.533545	-0.173512	0.000118549	0.434897	0.183433	0.000838259	-0.303187	-0.762711	0.156337	0.195958	0.501931
SL000089	TGF-b3	0.262183	0.12783	0.396535	0.000130885	0	0.554896	0.000920047	0.0715898	-0.0852366	0.228416	0.370944	0.688321
SL006088	Sphingosine kinase 1	-0.26418	-0.399669	-0.128692	0.000132585	0	0.519232	0.000921054	-0.109754	-0.393768	0.17426	0.448806	0.733449
SL005218	Siglec-7	0.263005	0.128104	0.397905	0.000132812	0	0.502685	0.000921054	0.127519	-0.0302683	0.285306	0.113197	0.362656
SL000047	IGF-I	-0.268144	-0.405716	-0.130572	0.000133341	0.0430051	0.306676	0.000921054	-0.173601	-0.462955	0.115753	0.239633	0.555809
SL003792	GRB2 adapter protein	-0.261183	-0.396112	-0.126254	0.00014829	0	0.964344	0.00101843	-0.129326	-0.287522	0.0288707	0.109095	0.355478
SL010384	Testican-1	-0.264183	-0.40148	-0.126885	0.000162411	0.030997	0.309692	0.00110903	0.0190149	-0.136324	0.174354	0.810395	0.928096
SL018921	HEMK2	-0.259305	-0.394225	-0.124386	0.000165288	0	0.341379	0.00112226	0.00307909	-0.152885	0.159043	0.969134	0.988181
SL003189	MIP-3b	0.258648	0.123897	0.393399	0.000168521	0	0.936722	0.00113776	0.204497	0.0460874	0.362906	0.0114	0.0867706
SL008516	CYTT	0.257753	0.123275	0.39223	0.0001722	0	0.885174	0.00115606	0.325941	0.11123	0.540652	0.00292684	0.0383309
SL003201	VEGF sR2	-0.259901	-0.395634	-0.124169	0.000174771	0	0.791913	0.00116676	-0.107468	-0.26656	0.0516231	0.185509	0.486374
SL016549	AMPK a2b2g1	-0.259356	-0.39529	-0.123422	0.000184369	0	0.411672	0.00122123	-0.178232	-0.412876	0.0564128	0.136552	0.408973
SL002731	Fas, soluble	0.427728	0.203497	0.651959	0.000184972	0.638366	0.0963329	0.00122123	0.373824	0.0995746	0.648073	0.00754931	0.0668254
SL005165	Galectin-4	0.258062	0.1225	0.393624	0.000190658	0	0.620647	0.00125185	0.0543834	-0.101061	0.209828	0.492897	0.762969
SL004146	IL-1 R4	0.331798	0.157332	0.506264	0.000193428	0.402492	0.195775	0.00126309	0.323777	0.16642	0.481134	5.51158e-05	0.00182954
SL004298	granzyme A	0.276576	0.131003	0.422149	0.000196277	0.140837	0.280653	0.00127474	0.151583	-0.00642498	0.309592	0.0600716	0.25857
SL004708	CTAP-III	-0.257754	-0.393698	-0.121811	0.000202264	0	0.898456	0.00130652	-0.171499	-0.331508	-0.0114889	0.0356681	0.188599
SL011888	SMOC1	0.380564	0.176943	0.584185	0.000249149	0.557806	0.13263	0.00159849	0.499968	0.252761	0.747176	7.37185e-05	0.00238091
SL004120	Discoidin domain receptor 2	-0.36539	-0.560946	-0.169833	0.00025014	0.52352	0.147422	0.00159849	-0.297026	-0.518636	-0.0754163	0.00861513	0.0705143
SL006131	FABPL	0.308097	0.142889	0.473305	0.000257043	0.326404	0.223061	0.00163386	0.256567	0.0982901	0.414845	0.00148755	0.0225016
SL008414	EphB6	0.351015	0.162361	0.53967	0.000265565	0.484188	0.163811	0.00167862	0.34297	0.058378	0.627562	0.0181762	0.115535
SL008416	MRC2	0.251303	0.116192	0.386414	0.000266893	0	0.680207	0.00167862	0.240373	0.081333	0.399414	0.00305364	0.0392376
SL003872	gp130, soluble	0.305266	0.140757	0.469775	0.000275884	0.331591	0.221274	0.00172608	0.307365	-0.0350504	0.64978	0.0785202	0.298814
SL007295	CAD15	-0.342175	-0.527246	-0.157105	0.000290342	0.463494	0.172174	0.00180708	-0.19973	-0.71127	0.31181	0.444114	0.730324
SL014092	CDON	-0.249775	-0.385071	-0.114479	0.000296478	0	0.371538	0.00183571	-0.129642	-0.288065	0.0287809	0.108737	0.355478
SL002539	OPG	0.249116	0.113657	0.384575	0.000312794	0	0.839813	0.00192675	0.297092	0.110587	0.483597	0.00179563	0.0255449
SL000541	Plasminogen	-0.248855	-0.384328	-0.113382	0.000317822	0	0.527619	0.00194768	-0.245599	-0.421472	-0.0697261	0.00620011	0.0584372
SL005213	RELT	0.516312	0.232663	0.799962	0.000360239	0.776372	0.0344604	0.00218739	0.408606	-0.061347	0.878558	0.08836	0.318043
SL014008	FUT5	0.256612	0.115625	0.397598	0.0003606	0.0820336	0.296612	0.00218739	0.208068	-0.0463197	0.462456	0.108915	0.355478
SL003066	PEDF	0.283775	0.127428	0.440122	0.00037454	0.26492	0.243469	0.00225178	-0.01173	-0.284611	0.261151	0.932857	0.972705
SL000320	C5a	0.244331	0.109704	0.378958	0.000374982	0	0.539064	0.00225178	-0.0103998	-0.164893	0.144094	0.895034	0.959059
SL002706	CD23	0.245554	0.110087	0.381021	0.000381251	0	0.391207	0.00227797	0.0652353	-0.0932353	0.223706	0.419764	0.720876
SL000414	Factor B	-0.24569	-0.381736	-0.109645	0.000400761	0	0.481388	0.00238263	-0.273426	-0.530559	-0.0162933	0.0371458	0.193614
SL012774	CREL1	0.286523	0.127704	0.445342	0.000406337	0.279124	0.238878	0.00240383	0.0635351	-0.0928337	0.219904	0.42582	0.722806
SL006970	DLL1	0.241734	0.107687	0.37578	0.000408526	0	0.806421	0.00240487	0.226343	0.0687436	0.383943	0.00487951	0.0511492
SL004733	sLRP1	0.270842	0.120513	0.42117	0.000413687	0.180899	0.269194	0.00242331	0.363098	0.191542	0.534654	3.35016e-05	0.00148275
SL006268	NSF1C	-0.234945	-0.365504	-0.104386	0.000420256	0	0.790342	0.00244979	-0.126403	-0.283917	0.0311109	0.115754	0.36887
SL002662	Coagulation Factor XI	-0.241046	-0.375289	-0.106803	0.000432675	0	0.339274	0.00250994	-0.156528	-0.314231	0.00117394	0.05173	0.235047
SL004939	PTP-1B	-0.288484	-0.44939	-0.127578	0.000441479	0.289476	0.235486	0.00254863	-0.212038	-0.619337	0.195262	0.307565	0.627534
SL018256	CHKB	-0.299672	-0.466917	-0.132427	0.000444913	0.339526	0.21852	0.00255611	-0.297091	-0.657286	0.0631038	0.105967	0.35175
SL008039	AK1A1	0.317032	0.139377	0.494687	0.000469425	0.416375	0.190541	0.00268403	0.105512	-0.14504	0.356064	0.40916	0.714833
SL006544	BGH3	0.485348	0.21239	0.758305	0.000492087	0.75949	0.0414426	0.00280021	0.368282	-0.0860118	0.822576	0.112087	0.361035
SL004326	TNFSF18	-0.275747	-0.431924	-0.119571	0.000539081	0.245278	0.249698	0.00305309	-0.165873	-0.636899	0.305153	0.490064	0.762012
SL004306	UBC9	-0.238503	-0.373885	-0.103121	0.000554646	0	0.374336	0.00312642	-0.215631	-0.418626	-0.0126357	0.0373457	0.193614
SL005210	Nr-CAM	0.235849	0.101915	0.369783	0.000557749	0	0.539393	0.00312915	0.324116	0.166937	0.481296	5.30878e-05	0.00182954
SL007173	GRN	0.237301	0.102267	0.372334	0.000572477	0	0.667584	0.00319678	0.195691	0.0348436	0.356539	0.0171005	0.111632
SL009045	ENPP7	0.237538	0.10221	0.372866	0.000581104	0	0.439155	0.00322986	-0.0643979	-0.219312	0.0905162	0.415211	0.72014
SL017529	KEAP1	-0.320526	-0.504412	-0.136639	0.000634691	0.458481	0.174173	0.00351137	-0.156126	-0.499062	0.18681	0.372233	0.688573
SL006230	Lumican	0.234878	0.0999805	0.369776	0.000643444	0	0.443141	0.00354339	0.250623	0.0405241	0.460722	0.019387	0.119027
SL001888	SLPI	0.456365	0.193675	0.719054	0.000661628	0.743468	0.0483392	0.00362681	0.403154	0.0676002	0.738707	0.0185319	0.115945
SL003190	MIP-5	0.378209	0.160256	0.596163	0.000671207	0.61572	0.106711	0.00366252	0.167201	-0.242421	0.576822	0.423697	0.721977
SL004209	annexin II	0.234719	0.0992286	0.370208	0.000685335	0	0.627087	0.00372261	0.243477	-0.0114729	0.498428	0.0612392	0.26034
SL004152	IL-18 Ra	0.234537	0.09902	0.370054	0.000693646	0	0.893129	0.00375071	0.00304692	-0.152952	0.159046	0.969463	0.988181
SL005212	Prolactin Receptor	-0.313601	-0.495309	-0.131894	0.000717979	0.440883	0.181105	0.0038648	-0.243137	-0.596959	0.110685	0.178033	0.476918
SL014113	NLGNX	0.233666	0.0977166	0.369616	0.000755155	0	0.875001	0.00404668	0.192167	0.0322527	0.352081	0.0185096	0.115945
SL004673	Cathepsin S	0.41586	0.173806	0.657915	0.000759074	0.691253	0.0719092	0.00404953	0.296702	-0.0189166	0.61232	0.065403	0.270438
SL007207	TSP4	0.442364	0.184436	0.700291	0.000775264	0.730438	0.0540966	0.00411751	0.367248	-0.0586135	0.79311	0.0909889	0.325544
SL003188	MIG	0.380377	0.158076	0.602678	0.000797458	0.632728	0.0989259	0.00421665	0.379829	0.0766896	0.682968	0.0140569	0.0982341
SL004009	RAC1	-0.230118	-0.365499	-0.0947366	0.000863785	0	0.611399	0.00454724	-0.141687	-0.300439	0.0170649	0.0802427	0.302146
SL008614	EFNB1	-0.220299	-0.35012	-0.0904771	0.000881242	0	0.919878	0.00461879	0.00106138	-0.216645	0.218768	0.992376	0.996612
SL004865	Cadherin-6	-0.347152	-0.552188	-0.142116	0.000905102	0.564206	0.129819	0.00471022	-0.348738	-0.767067	0.0695905	0.102276	0.348354
SL017128	LRRK2	-0.229215	-0.364612	-0.093817	0.00090657	0	0.457815	0.00471022	-0.0623184	-0.456682	0.332046	0.756775	0.905252
SL008837	CD63	-0.365744	-0.582032	-0.149457	0.000918652	0.610027	0.109302	0.00475233	-0.269835	-0.701189	0.161519	0.220176	0.527359
SL008382	CYTD	0.371576	0.151188	0.591964	0.000951394	0.620731	0.104424	0.0049005	0.434712	0.0804626	0.788961	0.0161662	0.108532
SL002763	Kallikrein 11	0.227965	0.0926005	0.363329	0.000964295	0	0.415564	0.00494563	0.246333	0.0870342	0.405632	0.00243903	0.0331209
SL000406	Eotaxin	0.228699	0.0924006	0.364998	0.0010066	0	0.338749	0.00514052	0.32097	0.160858	0.481083	8.52838e-05	0.00261318
SL012188	EP15R	-0.208853	-0.334028	-0.083678	0.00107481	0	0.740148	0.0054655	-0.120923	-0.282587	0.0407413	0.14264	0.418808
SL005574	Aminoacylase-1	0.224623	0.0889751	0.360271	0.00117221	0	0.926067	0.00593556	-0.103963	-0.257762	0.049836	0.185214	0.486374
SL006523	MFGM	0.432267	0.169884	0.694651	0.00124238	0.736674	0.0513268	0.00626433	0.140807	-0.0145711	0.296186	0.0757061	0.294687
SL014129	H6ST1	0.221943	0.0871628	0.356724	0.00124887	0	0.616475	0.00627057	0.170475	0.0119597	0.32899	0.0350448	0.186127
SL016555	PDE11	-0.325258	-0.523226	-0.12729	0.00128109	0.533468	0.143177	0.00640544	-0.164609	-0.570499	0.24128	0.426691	0.723256
SL012538	ARMEL	0.350436	0.137046	0.563826	0.00128767	0.599594	0.11403	0.00641154	0.463419	0.199141	0.727696	0.000588515	0.0106557
SL004924	eIF-4H	-0.220749	-0.356039	-0.0854586	0.0013838	0	0.694938	0.00680547	-0.1188	-0.346437	0.108836	0.306365	0.627534
SL000554	PKC-D	-0.257256	-0.414933	-0.0995784	0.00138507	0.261368	0.244605	0.00680547	-0.175513	-0.598826	0.2478	0.416428	0.720876
SL004354	IL-19	0.219848	0.0850742	0.354621	0.00138784	0	0.319363	0.00680547	0.112981	-0.0773195	0.303282	0.244575	0.562052
SL003191	NAP-2	-0.221561	-0.357443	-0.0856794	0.00139439	0	0.863755	0.00680547	-0.153197	-0.313244	0.00684963	0.060644	0.259748
SL007336	SET	-0.221252	-0.356952	-0.0855523	0.00139526	0	0.571506	0.00680547	-0.069477	-0.228268	0.0893138	0.391136	0.702913
SL012457	NXPH1	0.21764	0.0831629	0.352118	0.00151375	0	0.777031	0.00735339	0.233904	0.0755899	0.392218	0.0037821	0.0431849
SL010469	RGM-C	0.217588	0.0827583	0.352419	0.00156161	0	0.509146	0.00754962	0.0465388	-0.111291	0.204369	0.563312	0.80892
SL000344	Cathepsin D	0.222408	0.0845496	0.360267	0.00156678	0.0266524	0.310774	0.00754962	0.046881	-0.112265	0.206027	0.563695	0.80892
SL004723	HDAC8	-0.324645	-0.526366	-0.122925	0.00160868	0.549369	0.136311	0.00772037	-0.30515	-0.776377	0.166077	0.204369	0.50928
SL002081	Cadherin-5	0.333419	0.125618	0.54122	0.00166206	0.573846	0.125559	0.00794467	0.345554	-0.0443655	0.735474	0.0823947	0.305782
SL004650	sFRP-3	0.216749	0.0811278	0.35237	0.0017338	0	0.564673	0.00825456	0.214211	0.0546344	0.373787	0.00851341	0.0701622
SL003915	kallikrein 8	0.216915	0.0808206	0.353009	0.00178468	0	0.576115	0.00846309	0.262982	0.10294	0.423023	0.0012791	0.0206558
SL000545	Prekallikrein	-0.448478	-0.730284	-0.166673	0.00181356	0.772096	0.0361967	0.00856604	-0.365472	-0.796419	0.0654756	0.0964769	0.338094
SL007361	LPPL	-0.215813	-0.351909	-0.0797172	0.0018836	0	0.976476	0.00886182	-0.204571	-0.365658	-0.0434845	0.0128087	0.0939039
SL000449	HSP 40	-0.214332	-0.349586	-0.0790785	0.00189705	0	0.66149	0.00889008	-0.156806	-0.315878	0.00226545	0.0533532	0.239221
SL000454	HSP 90b	0.214896	0.0790269	0.350765	0.00193549	0	0.65365	0.0090348	-0.00538582	-0.162809	0.152037	0.946538	0.980167
SL005214	Semaphorin-6A	0.214195	0.0785216	0.349868	0.00197275	0	0.629117	0.00917289	0.272585	0.113003	0.432167	0.0008144	0.0141045
SL000053	tPA	0.432076	0.158084	0.706067	0.0019962	0.757099	0.0424566	0.00924597	0.301329	0.147513	0.455146	0.000123228	0.00329393
SL007674	LY9	0.212594	0.0776737	0.347515	0.00201297	0	0.899893	0.00928765	0.184398	0.0256815	0.343114	0.0227802	0.134764
SL006480	TRY3	-0.214089	-0.350355	-0.0778218	0.0020749	0	0.956314	0.00953655	-0.235509	-0.395987	-0.0750315	0.00402306	0.0453543
SL004804	Nectin-like protein 1	-0.299585	-0.490388	-0.108781	0.00208828	0.49529	0.15925	0.00956128	-0.292625	-0.696151	0.110901	0.155228	0.443774
SL001998	TFPI	0.217628	0.0777268	0.357529	0.0022969	0.0853141	0.295747	0.0104763	0.176435	-0.0168948	0.369764	0.0736655	0.290108
SL004648	LIGHT	-0.210964	-0.346705	-0.0752234	0.00231819	0	0.660145	0.0105332	-0.163976	-0.323785	-0.00416764	0.0443172	0.212687
SL000051	CRP	0.210212	0.0746483	0.345776	0.00237193	0	0.335431	0.0107366	-0.0313487	-0.188933	0.126235	0.696609	0.873128
SL016566	DRAK2	-0.344126	-0.566585	-0.121667	0.00243015	0.628878	0.100693	0.0109586	-0.251916	-0.802496	0.298664	0.36984	0.688286
SL005703	Notch 1	0.208999	0.0736716	0.344327	0.00247029	0	0.429794	0.0110977	0.335561	0.059529	0.611593	0.0171886	0.111632
SL003341	Fibrinogen g-chain dimer	0.235318	0.0824163	0.388219	0.00255783	0.220456	0.257379	0.011448	0.250863	-0.0873917	0.589118	0.146061	0.425714
SL007385	IL24	0.208403	0.0727782	0.344028	0.00259783	0	0.395455	0.0115836	0.115392	-0.0441004	0.274884	0.156184	0.44544
SL007311	SNP25	-0.208732	-0.344781	-0.0726837	0.00263777	0	0.580459	0.0117173	-0.207914	-0.479613	0.0637861	0.133659	0.406225
SL010379	Semaphorin 3A	-0.208038	-0.343684	-0.0723918	0.00264742	0	0.35354	0.0117173	-0.16078	-0.531415	0.209854	0.395199	0.702913
SL000137	BTC	-0.20713	-0.342575	-0.0716848	0.002724	0	0.898631	0.0120117	-0.172662	-0.332075	-0.0132485	0.0337662	0.181231
SL000019	Apo A-I	-0.215944	-0.35729	-0.0745974	0.00275021	0.0749302	0.298474	0.0120827	-0.0573291	-0.362818	0.24816	0.713013	0.882954
SL010470	Semaphorin 3E	0.208227	0.0718534	0.344601	0.00276575	0	0.703372	0.0121065	0.182861	-0.0156829	0.381405	0.0710516	0.285204
SL014289	KI3S1	-0.206129	-0.341621	-0.0706361	0.00286606	0	0.538382	0.0124998	-0.195244	-0.39549	0.00500102	0.0560027	0.247864
SL011049	MASP3	-0.325967	-0.540535	-0.111399	0.00290575	0.599421	0.114108	0.0125949	-0.275216	-0.783424	0.232992	0.288506	0.614555
SL006108	CD5L	0.206705	0.0706261	0.342784	0.00290894	0	0.794952	0.0125949	0.163725	-0.103958	0.431407	0.230611	0.54248
SL000582	Survivin	-0.243864	-0.404513	-0.0832156	0.00292779	0.281652	0.238054	0.0126307	-0.249794	-0.549906	0.0503177	0.102816	0.348354
SL008759	GPVI	-0.204932	-0.340208	-0.0696563	0.00298587	0	0.948735	0.012835	-0.0813296	-0.254055	0.0913958	0.356075	0.678644
SL010288	Carbonic anhydrase 6	-0.205861	-0.341917	-0.0698045	0.00302158	0	0.629868	0.0129419	-0.0202772	-0.178782	0.138228	0.80202	0.923875
SL005231	UNC5H4	0.204413	0.0689621	0.339864	0.00309805	0	0.591607	0.013222	0.441138	0.284927	0.59735	3.11386e-08	9.99948e-06
SL004914	PPase	-0.205284	-0.341394	-0.0691735	0.00311606	0	0.853899	0.0132516	-0.0193479	-0.177858	0.139162	0.810923	0.928096
SL004588	IL-1 R AcP	-0.203891	-0.339204	-0.0685788	0.00314388	0	0.507787	0.0133225	0.0717868	-0.0840256	0.227599	0.366523	0.68759
SL003041	PF-4	-0.204794	-0.340834	-0.0687541	0.00317236	0	0.635703	0.0133957	-0.0826433	-0.2423	0.0770137	0.310327	0.62961
SL010381	Soggy-1	-0.340575	-0.566946	-0.114205	0.00319034	0.640064	0.0955514	0.0134241	-0.211792	-0.755179	0.331594	0.444913	0.730324
SL012561	REG4	0.204562	0.0682528	0.340871	0.00326774	0	0.990392	0.0136988	0.343548	0.184125	0.50297	2.404e-05	0.00114911
SL008360	FLRT2	0.314902	0.104951	0.524853	0.00328518	0.583323	0.12134	0.0136988	0.384616	0.116216	0.653016	0.00497547	0.051256
SL004355	LD78-beta	0.204559	0.0681544	0.340964	0.00329	0	0.825569	0.0136988	0.0681906	-0.0919414	0.228323	0.403925	0.707758
SL000017	vWF	0.265867	0.0884797	0.443255	0.00330786	0.413326	0.191697	0.0137253	0.250699	0.0205104	0.480887	0.0327935	0.178942
SL014469	SHC1	-0.202444	-0.337876	-0.0670121	0.00339225	0	0.855171	0.0140268	-0.122332	-0.281587	0.0369218	0.13218	0.402946
SL004849	IL-1 sR9	-0.200464	-0.335947	-0.064982	0.00373126	0	0.635979	0.0153753	-0.0490002	-0.246208	0.148207	0.626263	0.846223
SL004253	17-beta-HSD 1	-0.287519	-0.482313	-0.0927246	0.00381664	0.511753	0.152392	0.0156275	-0.268953	-0.701809	0.163902	0.223294	0.531546
SL016928	SLAF7	0.199125	0.0642102	0.334041	0.00381861	0	0.74817	0.0156275	0.196363	0.0371525	0.355573	0.0156348	0.106157
SL003322	VEGF sR3	0.260516	0.0835535	0.437478	0.00390955	0.411847	0.192257	0.0159451	0.28204	0.0586785	0.505402	0.0133289	0.0948098
SL011809	XTP3A	0.19969	0.063869	0.335511	0.0039563	0	0.641534	0.0160809	0.210431	0.050517	0.370345	0.00990525	0.0778735
SL003679	IGF-II receptor	0.19899	0.0635338	0.334446	0.00398613	0.021739	0.311993	0.0161472	0.19888	0.0415519	0.356209	0.0132266	0.0948098
SL004143	GFRa-2	0.198078	0.0628466	0.333309	0.004094	0	0.691216	0.0165281	0.236592	0.0775269	0.395656	0.00355419	0.0416398
SL006397	NRP1	0.196971	0.0613649	0.332576	0.00441479	0	0.415522	0.0177632	0.275041	0.115635	0.434446	0.000720257	0.0126574
SL000343	Cathepsin B	0.197733	0.0615214	0.333945	0.00443833	0	0.996271	0.017798	0.198757	0.0382606	0.359253	0.0152159	0.1045
SL010517	STK16	-0.196339	-0.331704	-0.0609749	0.00447149	0	0.543442	0.017871	-0.0322957	-0.421712	0.357121	0.870875	0.95285
SL003183	IP-10	0.380833	0.117346	0.644319	0.0046135	0.739613	0.0500304	0.0183771	0.259171	-0.0679428	0.586284	0.120454	0.378796
SL004768	AIF1	-0.228292	-0.386527	-0.0700562	0.00468828	0.259477	0.245209	0.0185247	-0.130882	-0.626853	0.365089	0.605006	0.829155
SL014270	CLM6	0.315291	0.0967363	0.533846	0.00469161	0.617216	0.106029	0.0185247	0.111111	-0.267564	0.489786	0.565228	0.80892
SL003168	CTACK	0.204485	0.0627206	0.346249	0.00469705	0.071208	0.299444	0.0185247	0.22099	0.0601315	0.381848	0.00708904	0.0644811
SL014292	SIG14	0.194959	0.0597036	0.330214	0.00472627	0	0.819344	0.0185786	0.192866	0.0337785	0.351954	0.017496	0.113014
SL011211	IF4G2	-0.221513	-0.375388	-0.0676376	0.00478013	0.292247	0.234572	0.0187287	-0.11283	-0.26203	0.0363711	0.138293	0.411094
SL004097	SMAD3	-0.290326	-0.492104	-0.0885491	0.00480108	0.54433	0.138498	0.0187493	-0.357723	-0.736779	0.0213323	0.0643623	0.269661
SL008808	SKP1	-0.196141	-0.332677	-0.0596059	0.00486853	0	0.839994	0.0189508	-0.227259	-0.388077	-0.06644	0.00561085	0.0553006
SL006406	PLXC1	0.195199	0.0590243	0.331374	0.00496185	0	0.952809	0.0192513	0.213339	0.0529321	0.373745	0.00914123	0.0733139
SL004469	amyloid precursor protein	-0.194082	-0.330395	-0.05777	0.0052609	0	0.692772	0.0203456	-0.161751	-0.322351	-0.0011509	0.0483807	0.224961
SL004081	Bone proteoglycan II	0.324643	0.0959501	0.553335	0.00539777	0.648723	0.0915583	0.020779	0.21231	-0.0632323	0.487852	0.130996	0.401386
SL011530	DLRB1	-0.192774	-0.328602	-0.0569463	0.00540776	0	0.502755	0.020779	-0.124766	-0.342143	0.0926101	0.26061	0.578865
SL003687	Nucleoside diphosphate kinase A	-0.193027	-0.329098	-0.0569557	0.00543002	0	0.521272	0.0207977	-0.0769854	-0.236778	0.0828073	0.345028	0.671512
SL007752	DAPK2	-0.320302	-0.54657	-0.0940328	0.00552891	0.640037	0.0955635	0.0211088	-0.300834	-0.785505	0.183838	0.223779	0.531641
SL003993	BMP-6	0.217476	0.063643	0.371309	0.00559136	0.241967	0.250735	0.0212792	0.141611	-0.0796416	0.362863	0.209675	0.517696
SL004750	DEAD-box protein 19B	-0.205561	-0.351168	-0.0599537	0.00565784	0.124405	0.285213	0.0214639	-0.157669	-0.31768	0.00234233	0.0534493	0.239221
SL001721	PECAM-1	-0.192679	-0.329377	-0.0559814	0.00573391	0	0.822053	0.0216836	-0.229647	-0.390669	-0.0686248	0.00518569	0.0529649
SL002792	BARK1	-0.19136	-0.327246	-0.055474	0.00577842	0	0.922219	0.021783	-0.185716	-0.345789	-0.0256436	0.022969	0.135212
SL010503	MAPK2	-0.187902	-0.321921	-0.0538824	0.0059966	0	0.469952	0.0225344	-0.229476	-0.386925	-0.0720268	0.00428244	0.0478272
SL004153	M-CSF R	0.190001	0.0535376	0.326464	0.00635457	0	0.443876	0.0238047	-0.0581867	-0.216505	0.100132	0.471314	0.753977
SL003323	PARC	0.28421	0.0796209	0.488798	0.00647442	0.556842	0.133052	0.0241779	0.0769676	-0.442378	0.596313	0.771457	0.911861
SL000062	PSA	0.200255	0.0555889	0.344921	0.00666581	0.112421	0.288489	0.0248149	0.36216	0.101548	0.622772	0.00645619	0.0602745
SL006029	Chitotriosidase-1	0.188867	0.0523761	0.325358	0.00668652	0	0.926981	0.0248149	0.214756	0.0541013	0.37541	0.00879313	0.0714237
SL004180	CD30	0.187998	0.0516215	0.324374	0.00689538	0	0.733746	0.0255108	0.109082	-0.0512298	0.269393	0.182325	0.481782
SL010456	CYTN	0.187083	0.0513012	0.322864	0.00692393	0	0.939555	0.0255373	0.244301	0.0629995	0.425602	0.00826563	0.0687895
SL003193	6Ckine	0.186802	0.0509747	0.322628	0.00702782	0	0.547183	0.0258407	0.106771	-0.052962	0.266505	0.190159	0.492359
SL000084	EGF	-0.205401	-0.354888	-0.0559142	0.00707975	0.179021	0.269742	0.0259518	-0.127216	-0.340089	0.0856575	0.241478	0.556005
SL008402	LYPD3	-0.327721	-0.56753	-0.0879124	0.00739583	0.678338	0.0778678	0.0270276	-0.29882	-0.741267	0.143627	0.185596	0.486374
SL000498	Leptin	0.298598	0.0792816	0.517914	0.00761951	0.615408	0.106853	0.0277601	-0.200367	-0.348509	-0.0522262	0.00802691	0.0687895
SL000124	MMP-2	0.184241	0.0487093	0.319772	0.0077134	0	0.668359	0.0280168	0.399054	0.24261	0.555498	5.74967e-07	6.87086e-05
SL008956	ARSB	-0.309873	-0.537977	-0.0817688	0.00775499	0.646623	0.0925274	0.0280825	-0.198878	-0.698059	0.300304	0.434882	0.729912
SL017612	HSP 90a/b	0.184683	0.0484551	0.32091	0.00788142	0	0.963632	0.0284541	-0.0824985	-0.239369	0.0743724	0.30266	0.627534
SL000458	IFN-g R1	0.182923	0.0477503	0.318095	0.00799379	0	0.791562	0.0287728	0.194595	0.0296039	0.359585	0.0207977	0.124653
SL009412	DKK3	0.446389	0.116138	0.77664	0.00806782	0.834258	0.0140371	0.0289521	0.601089	0.184126	1.01805	0.00472126	0.0503741
SL008122	DUS3	-0.183369	-0.319092	-0.0476466	0.00809629	0	0.972973	0.0289673	-0.0564945	-0.303937	0.190948	0.654524	0.860188
SL005491	OBCAM	-0.299939	-0.522361	-0.0775179	0.00821636	0.62617	0.101935	0.0293091	-0.153564	-0.725832	0.418703	0.598928	0.829155
SL010464	LRIG3	-0.183241	-0.319235	-0.0472466	0.00826895	0	0.356902	0.0294089	-0.112908	-0.272727	0.0469115	0.166157	0.46069
SL013570	DYRK3	-0.307432	-0.536916	-0.0779469	0.00864744	0.649678	0.0911178	0.0306638	-0.24029	-0.772055	0.291475	0.375805	0.690398
SL005209	Notch-3	0.181114	0.0455475	0.316681	0.00883256	0	0.956482	0.0312275	0.172209	0.0126616	0.331757	0.0343869	0.183448
SL011069	Marapsin	-0.320094	-0.559915	-0.0802736	0.0088964	0.678889	0.0776132	0.0313605	-0.189415	-0.750435	0.371605	0.508141	0.774809
SL009341	BASI	-0.263845	-0.461737	-0.0659531	0.00897045	0.54802	0.136898	0.0315285	-0.277534	-0.698595	0.143528	0.196403	0.501931
SL001797	Kallikrein 6	-0.219282	-0.383943	-0.0546215	0.0090509	0.318119	0.225894	0.031718	-0.146435	-0.720758	0.427887	0.617263	0.836315
SL007871	Cytidylate kinase	-0.324518	-0.568841	-0.0801951	0.00923334	0.691299	0.0718876	0.032262	-0.226676	-0.746546	0.293194	0.392777	0.702913
SL008835	ASGR1	-0.180419	-0.316304	-0.0445333	0.00926015	0	0.80589	0.032262	-0.256602	-0.416184	-0.0970198	0.00162408	0.023743
SL004844	EphA5	0.180392	0.0440906	0.316694	0.00948752	0	0.557168	0.0329581	0.186594	0.0261683	0.347019	0.0226273	0.134526
SL004557	CD59	0.470705	0.113905	0.827505	0.00971923	0.857937	0.00797483	0.0336559	0.396198	-0.158366	0.950762	0.161436	0.45499
SL019019	PIANP	0.178973	0.0432619	0.314684	0.00974472	0	0.353579	0.0336559	0.275598	0.116219	0.434978	0.000701074	0.0125042
SL003711	Caspase-3	-0.178036	-0.313967	-0.0421057	0.0102559	0	0.572073	0.0353193	-0.0653712	-0.27289	0.142147	0.536961	0.793232
SL018509	RSPO3	0.329446	0.0777277	0.581165	0.0103123	0.70729	0.0645534	0.0354115	0.32146	0.0345653	0.608356	0.0280847	0.157972
SL010528	UFM1	-0.177784	-0.313931	-0.041637	0.0104863	0	0.944762	0.0359058	-0.0700881	-0.2451	0.104924	0.432501	0.727942
SL004580	Macrophage scavenger receptor	-0.212816	-0.376781	-0.0488515	0.0109618	0.305472	0.230167	0.0374268	-0.121732	-0.564315	0.320852	0.589829	0.824381
SL010530	OCAD1	-0.322952	-0.573105	-0.0727985	0.0113951	0.706348	0.0649837	0.0387952	-0.294633	-0.766004	0.176739	0.220544	0.527359
SL004845	EphB4	-0.329491	-0.585161	-0.0738217	0.0115408	0.719755	0.0588923	0.0391798	-0.240417	-0.799299	0.318465	0.399157	0.706656
SL000581	SOD	-0.175717	-0.312138	-0.0392946	0.0115861	0	0.437876	0.0392221	-0.133516	-0.294103	0.0270711	0.103194	0.348354
SL008644	BST1	0.182021	0.0394227	0.324619	0.0123558	0.081003	0.296883	0.0416826	0.186229	0.0254612	0.346997	0.0231852	0.135815
SL010376	MMEL2	-0.340302	-0.606982	-0.0736218	0.0123827	0.742085	0.0489448	0.0416826	-0.312945	-0.817635	0.191745	0.224243	0.531686
SL007229	STAT6	-0.169228	-0.30224	-0.0362155	0.0126452	0	0.865403	0.0424468	-0.172453	-0.328532	-0.0163741	0.0303431	0.167871
SL000479	IL-3	-0.172358	-0.308289	-0.0364273	0.0129477	0	0.32211	0.0433404	-0.0940677	-0.584333	0.396198	0.706872	0.878079
SL014130	CHST6	0.17095	0.0359241	0.305976	0.013086	0	0.673781	0.0436811	0.112946	-0.0458791	0.271771	0.163379	0.456163
SL007429	GPNMB	0.172393	0.0360326	0.308753	0.0132167	0	0.358764	0.0439943	0.244542	0.0841685	0.404916	0.00280252	0.0372112
SL004475	IFN-a/b R1	-0.170439	-0.30539	-0.0354881	0.0133095	0.0210494	0.312163	0.0441802	-0.108192	-0.265919	0.0495343	0.178808	0.476955
SL007310	RAC3	-0.170794	-0.306721	-0.0348678	0.0137883	0	0.606282	0.0456426	-0.11399	-0.273932	0.0459516	0.162455	0.455295
SL013872	LRP1B	-0.170954	-0.307106	-0.0348018	0.0138569	0	0.637629	0.0457306	-0.107729	-0.268012	0.0525537	0.187728	0.489814
SL000052	Troponin T	-0.31999	-0.574931	-0.0650495	0.0138914	0.717617	0.0598591	0.0457306	-0.255497	-0.797199	0.286205	0.355263	0.678178
SL003197	TECK	0.16975	0.0343182	0.305181	0.0140252	0	0.9773	0.0460443	-0.0812101	-0.236852	0.0744318	0.306468	0.627534
SL004742	Afamin	0.170288	0.034095	0.306481	0.0142607	0	0.988908	0.0466893	-0.0542137	-0.211007	0.102579	0.497969	0.768828
SL010458	Endocan	0.169397	0.0332362	0.305558	0.0147532	0	0.754108	0.0480503	0.290854	0.131667	0.450042	0.00034217	0.00688276
SL004739	ITI heavy chain H4	0.16917	0.0331867	0.305154	0.0147569	0	0.735007	0.0480503	0.137946	-0.022208	0.2981	0.0913762	0.325954
SL004853	B7-H2	-0.167918	-0.303889	-0.0319476	0.0155002	0	0.435383	0.0503335	-0.113457	-0.276141	0.0492269	0.171659	0.465428
SL010467	RGMA	0.166948	0.0314809	0.302415	0.0157164	0	0.918074	0.0508972	0.249039	0.0901439	0.407934	0.00212712	0.029557
SL016553	PDE3A	-0.298576	-0.541183	-0.0559684	0.0158601	0.685853	0.0743978	0.0510762	-0.295569	-0.723918	0.13278	0.176243	0.473281
SL003328	Factor I	-0.166932	-0.302601	-0.0312635	0.0158819	0	0.704222	0.0510762	-0.245637	-0.462384	-0.0288907	0.0263366	0.151309
SL011808	CPNE1	-0.168004	-0.304567	-0.0314409	0.0158999	0	0.80965	0.0510762	-0.129843	-0.29078	0.031093	0.11381	0.363644
SL003326	I-TAC	0.285953	0.0521458	0.519761	0.0165258	0.662352	0.08526	0.0529445	0.24344	-0.0799139	0.566794	0.140057	0.414279
SL000139	EPI	-0.16104	-0.293191	-0.0288883	0.0169214	0	0.664523	0.0540669	-0.130498	-0.285337	0.0243406	0.0985635	0.342394
SL005157	DC-SIGN	-0.162742	-0.296724	-0.0287586	0.0172817	0	0.751853	0.0550711	-0.0309397	-0.187521	0.125641	0.698549	0.873128
SL008945	TGM3	0.18202	0.0319785	0.332062	0.0174214	0.176839	0.270378	0.0553684	0.207432	0.0476182	0.367247	0.0109606	0.085051
SL004672	BCMA	0.329482	0.057417	0.601547	0.0176157	0.751269	0.044953	0.0558377	0.415057	-0.043423	0.873538	0.0760079	0.294901
SL005170	ICOS	-0.164391	-0.300885	-0.0278961	0.0182488	0	0.509406	0.0576913	-0.224449	-0.385116	-0.0637833	0.00618035	0.0584372
SL003302	MPIF-1	0.163195	0.0273084	0.299082	0.0185803	0	0.928924	0.0585842	0.247215	0.0680409	0.426389	0.00684576	0.0630869
SL003187	MDC	0.186551	0.0307718	0.342331	0.018919	0.237684	0.25207	0.0594021	0.00677325	-0.151768	0.165315	0.933268	0.972705
SL010328	MED-1	0.162079	0.0267122	0.297446	0.0189391	0	0.613505	0.0594021	0.235021	0.0759481	0.394094	0.00378273	0.0431849
SL009790	RUXF	-0.163026	-0.299449	-0.0266024	0.0191728	0	0.989421	0.0599777	-0.00218038	-0.247762	0.243402	0.986116	0.996119
SL000342	Catalase	0.162824	0.0264152	0.299233	0.0193093	0	0.82957	0.060247	0.139767	-0.020863	0.300397	0.08812	0.318043
SL013988	CHST2	0.16221	0.0260732	0.298347	0.0195257	0	0.914806	0.0607635	0.104908	-0.0551969	0.265014	0.199051	0.503954
SL007471	COLEC12	-0.161902	-0.297983	-0.0258199	0.0197089	0	0.825515	0.0611745	0.0583358	-0.164812	0.281483	0.608386	0.829933
SL008773	CD109	0.184641	0.0288355	0.340447	0.0201953	0.239647	0.251459	0.0625216	0.290258	0.131282	0.449234	0.000345578	0.00688276
SL014308	FGF-8A	0.177583	0.0270823	0.328083	0.0207416	0.178921	0.269771	0.0639476	0.260054	0.100097	0.420011	0.00144027	0.0221218
SL000382	CK-MB	-0.15988	-0.2954	-0.0243598	0.0207629	0	0.464353	0.0639476	-0.13636	-0.295849	0.0231291	0.093791	0.33062
SL004304	STX1a	-0.160637	-0.296963	-0.0243118	0.0209161	0	0.945849	0.0642538	-0.309435	-0.468498	-0.150372	0.000137383	0.00356897
SL003060	bFGF-R	0.159624	0.0239674	0.295281	0.021097	0	0.771429	0.0646434	0.201342	0.0420183	0.360665	0.0132542	0.0948098
SL000441	HGF	0.159816	0.0235955	0.296036	0.0214788	0	0.345397	0.0656449	-0.0414685	-0.291114	0.208177	0.744751	0.90167
SL002519	ERBB3	-0.158977	-0.295131	-0.0228243	0.0221069	0	0.423149	0.0673146	-0.170683	-0.3482	0.00683495	0.0594974	0.257607
SL006372	YES	0.158895	0.0227314	0.295059	0.0221863	0	0.628925	0.0673146	0.119247	-0.0410275	0.279521	0.144773	0.422991
SL006629	SIRT2	-0.155025	-0.28788	-0.02217	0.0221941	0	0.65654	0.0673146	-0.0799456	-0.243334	0.0834432	0.337557	0.661279
SL006675	CKAP2	0.165026	0.0232121	0.306841	0.0225621	0.0794097	0.297301	0.068164	0.161888	0.00219669	0.321579	0.0469307	0.220796
SL005169	sICAM-5	0.15766	0.0221497	0.29317	0.0225882	0	0.344033	0.068164	0.26167	0.102546	0.420794	0.00126838	0.0206558
SL004760	PAFAH beta subunit	0.156237	0.021794	0.290681	0.0227453	0	0.987005	0.0684652	0.173843	-0.0296698	0.377355	0.0940867	0.330687
SL012108	PLCG1	-0.151442	-0.281937	-0.0209466	0.0229317	0	0.379492	0.0688526	-0.143354	-0.491703	0.204994	0.419912	0.720876
SL005372	Sorting nexin 4	-0.157903	-0.294158	-0.0216486	0.0231245	0	0.421438	0.0692577	-0.0257785	-0.185756	0.134199	0.752135	0.903318
SL004823	Cyclophilin A	-0.156801	-0.292434	-0.0211677	0.0234607	0	0.930238	0.0700889	-0.044423	-0.203777	0.114931	0.584806	0.821009
SL004683	Noggin	-0.156399	-0.292375	-0.0204231	0.0241746	0	0.994583	0.0720414	-0.124492	-0.284548	0.0355634	0.127391	0.396438
SL010515	RPS6KA3	-0.180438	-0.337664	-0.0232129	0.0244912	0.249206	0.248463	0.0728034	-0.173369	-0.333099	-0.0136396	0.0333928	0.180563
SL007025	JAK2	0.155517	0.0198995	0.291134	0.0246046	0	0.664628	0.0729591	0.327765	0.170229	0.485301	4.54549e-05	0.00169746
SL007560	STAB2	-0.247306	-0.464469	-0.030143	0.025614	0.607548	0.110428	0.0757643	-0.199861	-0.720802	0.32108	0.452082	0.736019
SL012168	LIN7B	0.146178	0.0177182	0.274637	0.0257277	0	0.708155	0.0759125	0.0663128	-0.0833473	0.215973	0.385154	0.69842
SL004330	CD22	-0.1546	-0.29085	-0.0183512	0.0261519	0	0.4755	0.0769741	-0.120003	-0.404108	0.164102	0.407744	0.713403
SL005173	IL-10 Ra	-0.154273	-0.290354	-0.0181923	0.0262843	0	0.470183	0.0771737	-0.106438	-0.334903	0.122028	0.361186	0.680785
SL002036	FGFR4	-0.159305	-0.300353	-0.0182574	0.026852	0.0612071	0.302033	0.0786473	-0.0873037	-0.247299	0.0726918	0.284853	0.610035
SL006992	MATN3	-0.189141	-0.356856	-0.0214261	0.0270805	0.334221	0.220364	0.0791228	-0.13829	-0.462946	0.186366	0.403796	0.707758
SL005084	Periostin	0.246884	0.0274911	0.466278	0.027415	0.614876	0.107095	0.0799047	0.426115	0.112252	0.739977	0.00779237	0.0684076
SL000396	Cytochrome c	-0.153018	-0.289058	-0.0169783	0.0274839	0	0.494196	0.0799105	0.0275011	-0.176845	0.231847	0.791953	0.917152
SL010504	MAPK5	-0.153137	-0.289874	-0.0164004	0.0281604	0	0.599853	0.0815535	-0.168308	-0.32947	-0.00714681	0.0406699	0.20326
SL013969	KYNU	0.15132	0.0161843	0.286455	0.0281854	0	0.520739	0.0815535	-0.0529468	-0.209869	0.103976	0.508416	0.774809
SL005199	MICA	0.151707	0.0154435	0.28797	0.0291023	0	0.972956	0.084003	0.151504	-0.0611914	0.364199	0.162687	0.455295
SL003184	sLeptin R	-0.149997	-0.284873	-0.0151218	0.029279	0	0.326364	0.0842437	0.0732405	-0.123529	0.27001	0.46568	0.748489
SL004676	IGFBP-5	-0.151006	-0.286887	-0.0151262	0.0293951	0	0.835797	0.0842437	0.0504038	-0.108132	0.208939	0.533193	0.792495
SL006114	ROR1	0.295948	0.0296414	0.562255	0.0293972	0.740128	0.0498037	0.0842437	0.336214	-0.170305	0.842734	0.193268	0.498823
SL007869	PPIB	-0.18989	-0.361003	-0.0187781	0.0296262	0.367702	0.20854	0.0846968	-0.152904	-0.573708	0.2679	0.476357	0.757985
SL006924	ART	0.151271	0.0146818	0.28786	0.0299585	0	0.433867	0.0854425	0.217711	0.0571114	0.378311	0.00788506	0.0684076
SL011073	XPNPEP1	0.149992	0.0144046	0.285579	0.0301444	0	0.769369	0.085768	0.0219001	-0.13698	0.18078	0.787036	0.916687
SL008574	OMD	0.149478	0.0141823	0.284774	0.0303558	0	0.883635	0.0861643	0.299665	0.142141	0.457188	0.0001926	0.00455265
SL004837	Activin AB	0.149851	0.0135888	0.286113	0.0311289	0	0.420344	0.0880602	-0.0652613	-0.223899	0.0933761	0.420068	0.720876
SL005205	NKp30	0.150117	0.0135786	0.286655	0.0311711	0	0.453878	0.0880602	0.0897943	-0.0709381	0.250527	0.27354	0.593607
SL002922	sICAM-1	0.191685	0.0167454	0.366624	0.0317476	0.398147	0.197396	0.0894772	0.158727	-0.0627908	0.380246	0.1602	0.452575
SL004925	AGR2	-0.149425	-0.286093	-0.0127577	0.0321193	0	0.361922	0.0903118	-0.148065	-0.308769	0.0126382	0.0709455	0.285204
SL010457	DLL4	-0.148316	-0.284315	-0.0123176	0.0325589	0	0.333005	0.0913331	-0.232072	-0.39199	-0.0721538	0.00445111	0.0484873
SL003690	RANK	-0.31304	-0.600962	-0.0251186	0.033093	0.778288	0.0336902	0.0925921	-0.28664	-0.776624	0.203344	0.251557	0.570418
SL005194	JAM-C	0.148342	0.0118489	0.284834	0.0331627	0	0.645047	0.0925921	0.102072	-0.0586087	0.262753	0.213109	0.518666
SL004759	eIF-5	-0.148379	-0.285073	-0.0116846	0.0333784	0	0.403309	0.0929772	-0.0755743	-0.236574	0.0854259	0.357564	0.679315
SL005730	cGMP-stimulated PDE	-0.167882	-0.322755	-0.0130096	0.0336196	0.225382	0.255871	0.0934313	-0.14022	-0.649468	0.369028	0.589424	0.824381
SL001802	IFN-g	0.147502	0.0109022	0.284101	0.0343115	0	0.509809	0.0950669	0.256824	-0.0159013	0.52955	0.0649376	0.269931
SL000310	C1r	0.205563	0.0151346	0.395991	0.0343673	0.492949	0.160216	0.0950669	0.153245	-0.243532	0.550022	0.449058	0.733449
SL008143	UBE2N	-0.146537	-0.282519	-0.0105554	0.0346776	0	0.548879	0.0957039	-0.105942	-0.286378	0.0744934	0.24982	0.569722
SL005234	GDF-9	-0.147154	-0.283775	-0.0105331	0.0347661	0	0.763896	0.095727	-0.0700492	-0.23085	0.0907519	0.393209	0.702913
SL004151	IL-15 Ra	0.156652	0.0109373	0.302367	0.0351108	0.117897	0.286997	0.0964435	0.0268857	-0.354509	0.40828	0.890111	0.956549
SL009349	FSTL1	0.227166	0.0157715	0.43856	0.0351877	0.591152	0.117832	0.0964435	0.165503	-0.252346	0.583351	0.437567	0.730324
SL004940	PTP-1C	-0.141996	-0.27444	-0.00955207	0.0356129	0	0.550369	0.0973854	-0.174881	-0.330222	-0.0195412	0.0273476	0.155621
SL004718	Karyopherin-a2	-0.176126	-0.340912	-0.0113398	0.0361853	0.316428	0.226469	0.0987246	-0.157975	-0.317133	0.00118388	0.0517287	0.235047
SL016554	PDE9A	0.143575	0.00835612	0.278794	0.0374262	0	0.791363	0.101705	0.113976	-0.0450618	0.273014	0.160132	0.452575
SL004872	EDAR	-0.202356	-0.392957	-0.0117554	0.037448	0.491483	0.16082	0.101705	-0.0717756	-0.364921	0.22137	0.631306	0.847652
SL004646	Layilin	0.145137	0.00836372	0.28191	0.0375424	0	0.934478	0.10173	0.0554688	-0.155152	0.26609	0.605734	0.829155
SL014071	FLRT1	-0.137426	-0.267241	-0.00761047	0.0379988	0	0.373888	0.102734	-0.148213	-0.39896	0.102534	0.246658	0.563588
SL004365	TWEAK	-0.142751	-0.277665	-0.00783685	0.0380966	0	0.950123	0.102766	0.0671972	-0.089559	0.223953	0.400805	0.707254
SL008372	FLRT3	0.206801	0.0109311	0.40267	0.0385136	0.514687	0.151158	0.103657	0.231071	0.0717941	0.390348	0.00446327	0.0484873
SL010488	ABL2	-0.301395	-0.587619	-0.0151703	0.0390324	0.775649	0.0347525	0.104817	-0.222921	-0.776486	0.330645	0.42995	0.724669
SL005352	FABPE	-0.145741	-0.28472	-0.00676276	0.0398465	0.0300847	0.30992	0.106764	-0.131887	-0.293185	0.0294115	0.109028	0.355478
SL001902	BCAM	0.225163	0.0102354	0.44009	0.0400432	0.596284	0.115523	0.107051	0.247789	0.0882854	0.407292	0.00232829	0.0319805
SL005215	Siglec-3	0.142494	0.00625028	0.278738	0.0403763	0	0.369651	0.1077	0.0582722	-0.102053	0.218597	0.476233	0.757985
SL004720	Calcineurin B a	-0.269167	-0.526819	-0.0115161	0.0406024	0.719637	0.0589454	0.108062	-0.149861	-0.720033	0.420311	0.606451	0.829187
SL010369	Carbonic Anhydrase IV	0.141835	0.00597307	0.277698	0.0407434	0	0.892108	0.108196	0.116315	-0.0437194	0.276349	0.154294	0.442163
SL000558	Prothrombin	-0.141466	-0.277132	-0.00580011	0.0409774	0.00118078	0.317025	0.108577	-0.055967	-0.215456	0.103522	0.491591	0.762012
SL004698	HPV E7 Type18	-0.160615	-0.314888	-0.00634208	0.0412969	0.219991	0.257521	0.109181	-0.147169	-0.633894	0.339556	0.553432	0.802611
SL003301	Ck-b-8-1	0.140872	0.00527448	0.276469	0.04173	0	0.919363	0.110082	0.281606	0.123504	0.439709	0.000481184	0.00927444
SL000039	IL-8	0.141052	0.0052158	0.276889	0.0418285	0	0.745204	0.110099	0.0921074	-0.0674909	0.251706	0.257998	0.575202
SL004154	NCAM-L1	0.204892	0.00734554	0.402438	0.0420684	0.525431	0.14661	0.110487	0.380276	0.222367	0.538185	2.35878e-06	0.000216827
SL004299	Livin B	-0.141462	-0.278203	-0.00471984	0.0425996	0	0.616364	0.111614	-0.203757	-0.36474	-0.0427735	0.0131114	0.0948098
SL005202	MSP	0.140372	0.00462806	0.276115	0.0426842	0	0.525374	0.111614	0.13063	-0.0291964	0.290457	0.109172	0.355478
SL004636	Flt-3	-0.25685	-0.507676	-0.00602481	0.0447452	0.705691	0.0652839	0.116748	-0.230038	-0.760834	0.300759	0.395652	0.702913
SL004260	resistin	0.138839	0.00315358	0.274524	0.0449078	0	0.529782	0.116917	0.0500948	-0.205764	0.305954	0.701169	0.873128
SL004063	FGFR-3	-0.139216	-0.275662	-0.00276961	0.0455275	0	0.648138	0.118273	-0.15701	-0.317718	0.0036981	0.05551	0.246597
SL003524	Protein disulfide isomerase A3	-0.289361	-0.573133	-0.00559	0.0456545	0.770295	0.036935	0.118345	-0.236412	-0.818118	0.345294	0.425711	0.722806
SL010491	CAMK2A	-0.137343	-0.272337	-0.00234986	0.0461432	0	0.692329	0.119353	-0.130177	-0.288878	0.0285245	0.107904	0.355478
SL006922	RAD51	-0.138413	-0.274565	-0.00226115	0.0463147	0	0.64551	0.119538	-0.0388736	-0.325751	0.248004	0.790557	0.917152
SL006923	TBP	-0.139	-0.27587	-0.00213059	0.0465388	0	0.501725	0.119857	-0.147396	-0.30862	0.0138281	0.0731557	0.290108
SL004337	FGF-19	0.29935	0.00429858	0.594402	0.0467544	0.791121	0.0286675	0.120154	0.236012	0.079347	0.392677	0.00315074	0.0400546
SL004984	14-3-3E	0.150344	0.00199465	0.298693	0.0469981	0.153047	0.277213	0.120425	0.185563	0.0220539	0.349073	0.0261269	0.150829
SL009210	Corticotropin-lipotropin	0.137152	0.00178085	0.272522	0.0470613	0	0.580526	0.120425	0.0982769	-0.100914	0.297468	0.333541	0.657467
SL008760	SLIK1	-0.287802	-0.57201	-0.00359415	0.0471723	0.772321	0.0361046	0.120451	-0.267565	-0.7828	0.24767	0.308762	0.627534
SL000587	Thyroglobulin	-0.130815	-0.260183	-0.00144665	0.0474926	0	0.460263	0.12101	-0.128914	-0.281057	0.0232283	0.0967682	0.338123
SL008709	DSC3	0.136435	0.00121588	0.271653	0.0479752	0	0.404535	0.121816	0.106243	-0.0527691	0.265256	0.190351	0.492359
SL003800	Kallikrein 4	-0.1382	-0.275192	-0.00120849	0.0480129	0	0.572569	0.121816	-0.106035	-0.26745	0.0553813	0.197918	0.503217
SL000024	TF	0.184991	0.00152239	0.36846	0.048129	0.443887	0.179931	0.121852	0.132678	-0.0277739	0.29313	0.105082	0.351607
SL007373	PPID	-0.182702	-0.3648	-0.000603429	0.0492456	0.45661	0.174916	0.123621	-0.186239	-0.342178	-0.0302999	0.0192426	0.119027
SL004876	Kallistatin	-0.136799	-0.273147	-0.000450064	0.0492486	0	0.68383	0.123621	-0.00275818	-0.162809	0.157293	0.973055	0.98865
SL000551	PKC-A	-0.235444	-0.470121	-0.000767399	0.0492555	0.667261	0.0829898	0.123621	-0.101007	-0.423195	0.221182	0.538917	0.794402
SL005688	14-3-3 protein zeta/delta	-0.136616	-0.27281	-0.000422554	0.0492934	0	0.848151	0.123621	-0.0331332	-0.193141	0.126874	0.68485	0.86876
SL007324	CSK21	-0.137298	-0.274203	-0.000393553	0.049345	0	0.615318	0.123621	-0.187807	-0.381681	0.00606826	0.0576148	0.253124
SL012395	NET1	0.301637	0.000626551	0.602646	0.049525	0.798999	0.0257146	0.123813	0.3891	0.195359	0.58284	8.27487e-05	0.00260223
SL005357	PSP	0.136215	0.000185275	0.272245	0.0496888	0	0.658117	0.123963	0.146097	-0.014011	0.306205	0.0737038	0.290108
SL000306	BNP-32	-0.136017	-0.272012	-2.2132e-05	0.0499627	0	0.848794	0.124386	-0.179904	-0.339974	-0.0198352	0.0276064	0.156349
SL004271	GFAP	-0.136133	-0.272562	0.000296763	0.0505004	0	0.977209	0.125464	-0.144514	-0.305202	0.0161743	0.0779543	0.29819
SL005226	TSLP R	-0.136344	-0.273231	0.000542689	0.0509152	0	0.960326	0.126232	-0.167274	-0.328572	-0.00597604	0.042095	0.206162
SL000528	NADPH-P450 Oxidoreductase	0.135349	-0.000654341	0.271352	0.0511125	0	0.648039	0.126458	-0.0727949	-0.230996	0.0854061	0.36713	0.68765
SL003280	HMG-1	-0.262117	-0.526354	0.00211979	0.0518665	0.736154	0.0515571	0.128059	-0.176891	-0.72748	0.373697	0.528897	0.790201
SL001737	STRATIFIN	-0.216685	-0.437094	0.0037231	0.0539975	0.616465	0.106371	0.133045	-0.177726	-0.680921	0.32547	0.488782	0.762012
SL010378	RET	0.131917	-0.00251248	0.266347	0.0544383	0	0.33388	0.133856	-0.281048	-0.43038	-0.131715	0.000225398	0.00508208
SL005629	NAGK	0.360422	-0.00867326	0.729517	0.055632	0.864722	0.00655076	0.13651	0.284504	-0.195289	0.764297	0.245152	0.562298
SL007151	GPDA	0.133148	-0.00327069	0.269568	0.0557515	0	0.626732	0.136523	-0.194483	-0.349068	-0.0398973	0.0136702	0.0960935
SL000021	Insulin	0.67058	-0.0171171	1.35828	0.0559815	0.963945	1.39072e-07	0.136806	-0.122589	-0.255826	0.0106492	0.0713393	0.285204
SL004482	Endoglin	0.188427	-0.00509677	0.381952	0.0563466	0.502866	0.156108	0.137417	0.119067	-0.186403	0.424536	0.444891	0.730324
SL004010	SCF sR	-0.131475	-0.267315	0.00436515	0.0578304	0	0.34123	0.140748	0.111027	-0.231333	0.453387	0.525027	0.788913
SL004921	NDP kinase B	-0.131448	-0.267542	0.00464504	0.0583488	0	0.478925	0.141491	-0.11078	-0.325357	0.103797	0.311597	0.631115
SL003680	sRAGE	-0.131841	-0.268354	0.00467166	0.0583723	0	0.815632	0.141491	-0.104058	-0.264763	0.0566463	0.204405	0.50928
SL005228	ULBP-2	-0.130589	-0.267209	0.00603046	0.0610062	0	0.97002	0.147576	-0.167401	-0.328321	-0.00648121	0.0414596	0.204728
SL016148	C34 gp41 HIV Fragment	0.129168	-0.00611758	0.264453	0.0612987	0	0.819958	0.147984	0.194215	0.0352004	0.35323	0.0166734	0.110564
SL005191	ILT-4	0.231624	-0.0118777	0.475125	0.0622712	0.68489	0.0748421	0.150028	0.114662	-0.397634	0.626958	0.660895	0.862915
SL000401	Elastase	-0.185527	-0.380891	0.00983766	0.0627062	0.509619	0.153287	0.150601	-0.204419	-0.369254	-0.0395839	0.0150724	0.104113
SL005219	Siglec-9	0.128517	-0.00684288	0.263878	0.0627609	0	0.377613	0.150601	0.132912	-0.0753301	0.341154	0.210949	0.518666
SL007696	C1QR1	0.196325	-0.0118089	0.404458	0.0644923	0.570433	0.127071	0.154445	0.204466	-0.275363	0.684295	0.403614	0.707758
SL003990	FGFR-2	-0.128522	-0.264984	0.0079398	0.0649028	0	0.627323	0.155118	-0.163941	-0.324662	-0.00321878	0.045585	0.217896
SL001990	IL-1Ra	-0.175348	-0.361657	0.0109606	0.0650872	0.492771	0.160289	0.155248	-0.392289	-0.562921	-0.221657	6.60552e-06	0.000455167
SL006805	MRCKB	-0.289604	-0.597807	0.0185984	0.0655204	0.806021	0.023177	0.155731	-0.268191	-0.828604	0.292222	0.348266	0.674052
SL010510	PAK7	-0.128395	-0.265051	0.00826079	0.0655505	0	0.959946	0.155731	-0.0300555	-0.232162	0.172051	0.770692	0.911859
SL005220	Sonic Hedgehog	0.126189	-0.00843755	0.260815	0.0661914	0	0.721496	0.156942	-0.0293699	-0.185854	0.127114	0.712979	0.882954
SL001718	IL-13	-0.127895	-0.264827	0.00903791	0.0671601	0	0.7676	0.158923	-0.167012	-0.328358	-0.00566569	0.0424799	0.207198
SL004466	Heparin cofactor II	-0.126843	-0.262744	0.00905891	0.0673522	0	0.651219	0.159063	-0.236429	-0.395194	-0.0776631	0.00351476	0.0416398
SL003919	kallikrein 14	-0.239207	-0.496342	0.017929	0.0682573	0.717969	0.0596998	0.160883	-0.13342	-0.735926	0.469086	0.664276	0.862915
SL004353	IL-17D	-0.12673	-0.263158	0.00969756	0.0686607	0	0.34321	0.161515	-0.142005	-0.302752	0.0187423	0.0833729	0.307147
SL000271	Angiotensinogen	-0.125448	-0.260804	0.00990723	0.0692928	0	0.362389	0.162681	-0.0508416	-0.364298	0.262615	0.750561	0.902334
SL000459	IgA	0.126257	-0.010046	0.262559	0.0694459	0	0.386966	0.162691	0.126978	-0.112059	0.366016	0.297808	0.624352
SL005158	DC-SIGNR	-0.125591	-0.261235	0.010053	0.0695693	0	0.488387	0.162691	-0.0709825	-0.483152	0.341187	0.735711	0.897117
SL006132	Lamin-B1	0.150047	-0.0120912	0.312185	0.069708	0.285846	0.23668	0.162697	0.13566	-0.0251835	0.296503	0.0983128	0.342394
SL000384	CTLA-4	-0.124923	-0.260692	0.0108468	0.0713286	0	0.954826	0.166155	-0.123587	-0.283342	0.0361677	0.129459	0.399752
SL004128	Activin RIB	-0.125457	-0.262109	0.0111955	0.0719569	0	0.790073	0.167293	-0.167106	-0.328087	-0.00612559	0.0418968	0.206036
SL004654	Granzyme H	-0.124874	-0.260973	0.0112246	0.0721266	0	0.482426	0.167362	-0.0480978	-0.208204	0.112008	0.555997	0.805353
SL005181	IL-20 Ra	0.124994	-0.0118306	0.261819	0.0733744	0.01187	0.314421	0.169927	0.112773	-0.0473637	0.272909	0.167505	0.461268
SL005224	Thrombopoietin Receptor	-0.124964	-0.261912	0.0119848	0.0737049	0	0.399493	0.170362	-0.120308	-0.281672	0.0410552	0.143934	0.421571
SL000002	VEGF	-0.123724	-0.260479	0.0130319	0.0761968	0	0.662297	0.175782	-0.0871639	-0.254448	0.0801198	0.307137	0.627534
SL004827	S100A6	-0.19477	-0.410742	0.0212019	0.0771353	0.597777	0.11485	0.177604	-0.138678	-0.41792	0.140563	0.330371	0.652551
SL021043	GDF-11/8	0.210685	-0.0232881	0.444658	0.0775836	0.66238	0.0852474	0.178293	0.214479	-0.0206485	0.449606	0.0738014	0.290108
SL000133	MIP-3a	-0.122382	-0.258453	0.0136897	0.0779379	0	0.482346	0.178764	-0.192278	-0.367056	-0.0175011	0.0310663	0.170295
SL005488	SPARCL1	0.122161	-0.0137592	0.258081	0.0781443	0	0.540846	0.178893	0.121884	-0.184051	0.427819	0.434893	0.729912
SL007756	GDF2	-0.122608	-0.259224	0.0140084	0.0785789	0	0.489586	0.179545	-0.0378842	-0.198665	0.122897	0.644211	0.856321
SL014470	BCAR3	-0.3167	-0.670234	0.0368332	0.0791288	0.853229	0.00904785	0.180329	-0.280725	-0.894725	0.333274	0.370194	0.688286
SL004714	LIF sR	0.12135	-0.0141564	0.256855	0.0792241	0	0.990766	0.180329	0.034679	-0.124506	0.193864	0.669391	0.862915
SL004610	LRP8	0.121441	-0.0145465	0.257429	0.0800652	0	0.874961	0.181897	0.251957	0.0924938	0.411421	0.00195619	0.0275017
SL005059	TGF-b R III	0.146272	-0.0176379	0.310182	0.0802811	0.307932	0.229341	0.182041	0.269112	-0.0542919	0.592515	0.102905	0.348354
SL006378	Esterase D	-0.138408	-0.293701	0.0168854	0.0806628	0.22323	0.256531	0.182561	-0.157232	-0.365547	0.0510824	0.139048	0.412312
SL010391	WFKN2	0.12089	-0.0152152	0.256996	0.0817082	0	0.558393	0.184577	0.312246	0.154299	0.470193	0.000106775	0.00296734
SL000272	Antithrombin III	-0.120773	-0.257002	0.0154551	0.0822801	0	0.658677	0.185518	0.0841569	-0.0740685	0.242382	0.297196	0.624352
SL011588	RS3A	-0.187808	-0.399799	0.0241832	0.0824969	0.582727	0.121606	0.185518	-0.18083	-0.440105	0.078445	0.171636	0.465428
SL003305	IL-2 sRa	-0.118519	-0.25234	0.0153019	0.0825903	0	0.366677	0.185518	-0.0841626	-0.242459	0.0741337	0.29738	0.624352
SL000383	CK-MM	-0.135423	-0.288471	0.0176243	0.0828714	0.211328	0.260151	0.1858	-0.0925617	-0.251981	0.0668572	0.255123	0.571993
SL005679	TCTP	-0.119897	-0.255503	0.015709	0.0831105	0	0.458764	0.185803	-0.0841694	-0.243662	0.0753231	0.300979	0.627534
SL000617	ALT	0.156778	-0.0205834	0.33414	0.083184	0.402557	0.19575	0.185803	-0.0297118	-0.246193	0.186769	0.787927	0.916687
SL017188	GSK-3 alpha/beta	-0.119841	-0.255542	0.01586	0.0834706	0	0.331383	0.186096	-0.122185	-0.451568	0.207198	0.467196	0.749395
SL004335	FGF-17	-0.120661	-0.257571	0.0162485	0.084104	0	0.648079	0.187159	-0.151701	-0.323377	0.0199754	0.0832892	0.307147
SL003520	calreticulin	-0.156097	-0.333706	0.0215114	0.0849647	0.403424	0.195426	0.188513	-0.154972	-0.381155	0.0712104	0.179305	0.477215
SL004765	MAPKAPK3	-0.191203	-0.408799	0.0263935	0.0850281	0.607163	0.110603	0.188513	-0.0652501	-0.223002	0.0925021	0.417545	0.720876
SL004060	Endothelin-converting enzyme 1	-0.119195	-0.254931	0.0165406	0.0852282	0	0.531941	0.188607	0.0452798	-0.113141	0.2037	0.575344	0.813868
SL018946	UB2G2	0.112598	-0.0157696	0.240965	0.0855803	0	0.83917	0.189036	-0.00921601	-0.198705	0.180273	0.924056	0.96855
SL010493	CAMK2D	-0.186801	-0.400107	0.0265057	0.0860858	0.590076	0.118316	0.189802	-0.204429	-0.563305	0.154447	0.264222	0.582557
SL000440	Hemopexin	-0.119278	-0.255682	0.0171253	0.0865483	0	0.46099	0.19014	0.0108955	-0.148914	0.170705	0.893698	0.959059
SL007888	Cystatin-S	0.117626	-0.016892	0.252144	0.0865577	0	0.690095	0.19014	0.106138	-0.0519908	0.264267	0.188324	0.4903
SL016563	GHC2	-0.119551	-0.256398	0.0172969	0.0868537	0	0.432048	0.190441	-0.164231	-0.325403	-0.00305817	0.0458085	0.217924
SL011405	PDE5A	-0.119042	-0.255929	0.017845	0.0882957	0	0.993194	0.193051	-0.213071	-0.373933	-0.0522097	0.00942901	0.0751178
SL007640	CLC7A	-0.118701	-0.255227	0.0178246	0.0883674	0	0.353087	0.193051	-0.141046	-0.301905	0.0198132	0.0856958	0.312215
SL000408	Epo	0.118141	-0.0179592	0.254241	0.0888802	0	0.931373	0.193817	-0.0714661	-0.261301	0.118369	0.460602	0.743809
SL009054	NRX1B	0.133616	-0.0205346	0.287767	0.0893427	0.242614	0.250533	0.194471	0.258458	0.102414	0.414502	0.0011691	0.0196771
SL006476	NMT1	-0.115247	-0.248693	0.0181995	0.0905197	0	0.607465	0.196675	-0.137754	-0.294514	0.0190049	0.085007	0.310652
SL001995	Angiopoietin-1	-0.117022	-0.253024	0.018979	0.0917091	0	0.462558	0.198897	-0.025032	-0.184905	0.134841	0.758935	0.90573
SL003200	sTie-2	0.117032	-0.0190719	0.253137	0.091927	0	0.815532	0.199005	0.143744	-0.016524	0.304011	0.0787668	0.298814
SL008588	SLAF5	-0.116735	-0.252563	0.0190924	0.092092	0	0.505476	0.199005	-0.065817	-0.225712	0.0940777	0.419796	0.720876
SL003080	MIF	0.116563	-0.0200741	0.2532	0.0945214	0.00320151	0.316535	0.203886	0.00767376	-0.152583	0.167931	0.925227	0.96855
SL011180	HXK1	-0.240822	-0.525093	0.0434481	0.0968337	0.769577	0.0372304	0.208498	-0.231349	-0.785233	0.322535	0.412988	0.718371
SL006777	FETUB	-0.177656	-0.388049	0.0327367	0.097925	0.587489	0.119476	0.210391	-0.222456	-0.379965	-0.0649465	0.00563801	0.0553006
SL005493	paraoxonase 1	-0.1285	-0.280743	0.0237423	0.0980652	0.188514	0.266959	0.210391	-0.0922043	-0.25348	0.0690712	0.26248	0.580858
SL000433	Glucagon	0.113366	-0.0214802	0.248212	0.0994033	0	0.535788	0.21288	-0.00932502	-0.167414	0.148764	0.907961	0.965315
SL004752	DRR1	-0.104961	-0.230215	0.0202936	0.100505	0	0.383936	0.214853	-0.112792	-0.299887	0.0743027	0.23737	0.555102
SL017328	MYPC1	-0.114507	-0.251337	0.0223217	0.100959	0	0.755241	0.215438	-0.106271	-0.267406	0.0548633	0.196138	0.501931
SL018938	SUMO3	-0.135159	-0.297879	0.0275607	0.103526	0.30033	0.231888	0.220523	-0.0313885	-0.190806	0.128029	0.699565	0.873128
SL002506	suPAR	0.113682	-0.0233129	0.250678	0.103858	0	0.74912	0.220648	0.0399727	-0.121107	0.201052	0.626701	0.846223
SL008378	4EBP2	-0.167773	-0.370008	0.0344614	0.103954	0.548842	0.136541	0.220648	-0.0893659	-0.391946	0.213214	0.562678	0.80892
SL004492	TLR2	0.113323	-0.0233643	0.250011	0.104175	0	0.484266	0.220725	0.0584582	-0.102333	0.21925	0.476108	0.757985
SL004643	Angiopoietin-4	0.112974	-0.0235305	0.249479	0.10478	0	0.965001	0.221615	0.14336	-0.0173518	0.304071	0.0804036	0.302146
SL008933	PARK7	0.199565	-0.0419581	0.441088	0.105345	0.67726	0.078366	0.222417	0.206609	-0.186135	0.599354	0.302509	0.627534
SL002525	C2	-0.112547	-0.249425	0.0243302	0.107054	0	0.358887	0.225356	-0.191862	-0.35234	-0.0313843	0.0191155	0.118974
SL000022	D-dimer	0.111567	-0.0241418	0.247276	0.107115	0	0.673514	0.225356	0.152978	-0.0316864	0.337642	0.10445	0.35061
SL016130	BRF-1	-0.10939	-0.242953	0.0241736	0.108443	0	0.829441	0.227749	-0.129447	-0.286238	0.0273437	0.105629	0.351607
SL002528	NPS-PLA2	0.111397	-0.0248745	0.247669	0.109111	0	0.412617	0.228751	0.0983034	-0.121664	0.318271	0.381081	0.693138
SL000450	HSP 60	0.111068	-0.0249771	0.247113	0.109571	0	0.58159	0.229312	0.0365033	-0.123091	0.196097	0.65394	0.860188
SL004126	4-1BB	0.111714	-0.0252699	0.248698	0.109954	0	0.503474	0.229711	0.113891	-0.0475892	0.275371	0.166864	0.461268
SL003764	NCAM-120	0.131826	-0.0300704	0.293721	0.110506	0.292167	0.234598	0.230462	0.436773	0.281753	0.591794	3.34711e-08	9.99948e-06
SL000497	Laminin	0.144062	-0.033082	0.321207	0.11095	0.403717	0.195316	0.230788	0.149314	-0.0101635	0.308791	0.0664976	0.273074
SL004338	FGF-20	-0.214879	-0.479175	0.0494171	0.111049	0.731511	0.0536183	0.230788	-0.0902898	-0.250143	0.0695629	0.268273	0.589312
SL002522	Rb	-0.109956	-0.246371	0.0264581	0.114148	0	0.559223	0.236817	-0.0968091	-0.257055	0.0634367	0.236385	0.553883
SL000251	a2-HS-Glycoprotein	-0.200246	-0.448957	0.0484652	0.114558	0.698091	0.0687651	0.237256	-0.278982	-0.541728	-0.0162363	0.0374266	0.193614
SL010508	PAK3	0.10919	-0.0265863	0.244966	0.114983	0	0.628706	0.237725	0.143871	-0.0158833	0.303625	0.0775473	0.297971
SL020172	RXFP1	-0.12129	-0.272591	0.0300106	0.116135	0.178146	0.269997	0.239692	-0.0100894	-0.171127	0.150949	0.902268	0.961829
SL001731	NSE	-0.107557	-0.243369	0.0282536	0.120609	0	0.662762	0.248497	-0.00293451	-0.162603	0.156734	0.971265	0.988181
SL011533	SGTA	-0.167846	-0.380021	0.0443301	0.12103	0.582859	0.121547	0.248933	-0.108183	-0.323199	0.106833	0.324066	0.645848
SL000134	Met	0.115225	-0.0319473	0.262397	0.124905	0.139897	0.280916	0.256464	0.391025	0.234517	0.547534	9.73981e-07	9.69923e-05
SL004230	tau	-0.106434	-0.242872	0.0300032	0.126274	0	0.680647	0.25883	-0.0766239	-0.237221	0.0839728	0.349717	0.674052
SL018625	TLR4:MD-2 complex	-0.106052	-0.242357	0.0302519	0.127268	0	0.788651	0.260421	-0.112966	-0.273384	0.0474516	0.167523	0.461268
SL008486	LEG9	0.204481	-0.0592619	0.468224	0.128619	0.73381	0.0525958	0.262735	0.0715502	-0.193753	0.336854	0.597093	0.827756
SL010494	CDK1/cyclin B	-0.111198	-0.254749	0.0323523	0.128953	0.0883368	0.294948	0.262968	-0.148272	-0.427013	0.130469	0.297145	0.624352
SL011708	ARP19	-0.111463	-0.256862	0.0339363	0.132966	0.14564	0.279305	0.270689	-0.101961	-0.25963	0.0557083	0.20499	0.50928
SL001890	GA733-1 protein	0.156619	-0.0483127	0.361551	0.134159	0.550152	0.135971	0.2723	0.124378	-0.0367771	0.285533	0.130361	0.401386
SL004875	IL-1Rrp2	0.104452	-0.0322398	0.241145	0.134213	0	0.738131	0.2723	0.011646	-0.149153	0.172445	0.887118	0.956549
SL018587	ISLR2	-0.180031	-0.41665	0.0565874	0.135899	0.665045	0.0840144	0.275253	-0.187412	-0.560628	0.185804	0.325014	0.646243
SL003331	MMP-16	-0.104205	-0.241322	0.0329111	0.136349	0	0.48031	0.275373	0.0274792	-0.133624	0.188583	0.738147	0.89917
SL003744	Galectin-3	0.119725	-0.037841	0.277291	0.136419	0.246838	0.249208	0.275373	0.215045	0.0554686	0.374622	0.00826024	0.0687895
SL007136	CEBPB	-0.103773	-0.240641	0.0330941	0.137266	0	0.772982	0.276614	-0.15464	-0.315885	0.00660548	0.0601526	0.25857
SL011549	ARI3A	-0.102775	-0.238707	0.0331578	0.138374	0	0.74213	0.278379	-0.128163	-0.288202	0.0318754	0.11651	0.370291
SL000424	Fibrinogen	0.300322	-0.0974929	0.698137	0.138971	0.883958	0.00332938	0.27911	0.397287	-0.042536	0.837109	0.0766584	0.296462
SL009868	SSRP1	0.102791	-0.0335662	0.239147	0.139544	0	0.567856	0.279791	0.0978865	-0.100686	0.296459	0.33396	0.657467
SL003178	sICAM-3	-0.102701	-0.23925	0.0338476	0.140447	0	0.425198	0.281128	-0.20438	-0.364812	-0.0439483	0.0125295	0.0929042
SL000586	Thrombin	-0.155576	-0.363312	0.052159	0.142145	0.568707	0.127834	0.284053	0.00050439	-0.181067	0.182075	0.995656	0.99854
SL007195	CD70	-0.101948	-0.238372	0.0344757	0.143014	0	0.725207	0.285311	-0.0936161	-0.254097	0.0668652	0.252899	0.571222
SL004938	CaMKK alpha	-0.152814	-0.358487	0.0528593	0.145326	0.554418	0.134111	0.289441	-0.183571	-0.403613	0.0364717	0.102028	0.348354
SL007651	FGF23	0.100465	-0.0348341	0.235764	0.145572	0	0.851772	0.289448	0.0266853	-0.13231	0.18568	0.74219	0.90167
SL005168	Growth hormone receptor	0.101026	-0.0352485	0.2373	0.146223	0	0.599672	0.290259	-0.290877	-0.441746	-0.140008	0.000157569	0.00392282
SL004269	ghrelin	-0.162022	-0.38122	0.0571762	0.147415	0.618941	0.105241	0.292141	-0.00613438	-0.267607	0.255338	0.963324	0.986366
SL003774	Apoptosis regulator Bcl-W	0.100205	-0.0357447	0.236154	0.14856	0	0.52841	0.293922	0.0937755	-0.0662403	0.253791	0.250715	0.570418
SL001943	IL-6 sRa	0.136818	-0.049503	0.323139	0.150086	0.462115	0.172725	0.296451	0.113214	-0.151463	0.377891	0.401828	0.707254
SL005223	TCCR	0.158121	-0.057447	0.37369	0.150533	0.599046	0.114277	0.296843	0.0416416	-0.171234	0.254517	0.701425	0.873128
SL000011	AFP	0.0994044	-0.0364799	0.235289	0.151633	0	0.788917	0.298413	0.0892905	-0.0707438	0.249325	0.27415	0.593607
SL004704	COMMD7	-0.100002	-0.236837	0.0368326	0.152033	0	0.328662	0.298413	-0.0276393	-0.223807	0.168528	0.782432	0.916687
SL003440	PAFAH	-0.156514	-0.3707	0.0576709	0.152078	0.592068	0.117421	0.298413	-0.187883	-0.510264	0.134498	0.253345	0.571222
SL000462	IGFBP-1	-0.149413	-0.354178	0.0553521	0.152675	0.553973	0.134306	0.299093	0.444385	0.301911	0.586859	9.76207e-10	5.83283e-07
SL007181	TYK2	0.0985294	-0.037027	0.234086	0.154272	0	0.777973	0.301727	-0.0282572	-0.186963	0.130449	0.727114	0.89374
SL004258	Adiponectin	-0.117757	-0.280415	0.044901	0.155921	0.296829	0.233053	0.304454	0.270796	0.118277	0.423315	0.000501602	0.00940772
SL006705	PFD5	0.110811	-0.0423659	0.263989	0.156227	0.201786	0.263019	0.304553	0.0987288	-0.129331	0.326788	0.396168	0.702913
SL004795	ERAB	0.0872904	-0.0334504	0.208031	0.156492	0	0.438471	0.304573	-0.0341137	-0.17339	0.105163	0.631182	0.847652
SL000521	MMP-1	0.124874	-0.0482532	0.298001	0.157453	0.37532	0.205787	0.305213	0.164537	0.00434002	0.324735	0.044108	0.212537
SL004712	SDF-1	0.126507	-0.0490187	0.302032	0.157771	0.396429	0.198035	0.305213	0.245593	0.0393175	0.451868	0.0196195	0.119619
SL004867	Carbonic anhydrase III	0.294138	-0.114121	0.702398	0.157922	0.889287	0.00265237	0.305213	0.278429	-0.119217	0.676074	0.169954	0.464748
SL000468	IgM	0.0978195	-0.0379755	0.233614	0.157993	0	0.903952	0.305213	0.0878123	-0.137217	0.312841	0.444373	0.730324
SL015728	GCKR	0.0985055	-0.0382763	0.235287	0.158098	0	0.958961	0.305213	0.0492434	-0.111778	0.210265	0.548909	0.799339
SL004467	protein Z inhibitor	-0.0974887	-0.233274	0.0382967	0.159374	0	0.536635	0.307181	-0.105129	-0.378172	0.167915	0.450467	0.734391
SL005160	ESAM	0.176135	-0.0697459	0.422015	0.160317	0.691524	0.0717842	0.308501	0.219045	-0.220713	0.658802	0.328933	0.651866
SL004352	IL-17F	0.0975894	-0.0391236	0.234302	0.16179	0	0.572123	0.310835	0.10293	-0.0578884	0.263748	0.209678	0.517696
SL010514	PTK6	-0.0967301	-0.232694	0.0392335	0.163197	0	0.990432	0.313035	-0.13824	-0.298236	0.0217552	0.0903678	0.324293
SL000142	TS	0.145508	-0.0591549	0.35017	0.16348	0.550423	0.135853	0.313074	0.152717	-0.08323	0.388664	0.204588	0.50928
SL007250	PK3CG	-0.127039	-0.30588	0.0518021	0.163846	0.414745	0.19116	0.313264	-0.0973937	-0.561566	0.366779	0.680894	0.86876
SL010349	FN1.3	0.189202	-0.0774044	0.455808	0.164249	0.738031	0.0507275	0.313264	0.0778268	-0.383991	0.539645	0.741175	0.90167
SL005261	TCPTP	-0.0955195	-0.230154	0.0391152	0.164365	0	0.495783	0.313264	-0.034144	-0.259256	0.190968	0.766254	0.910213
SL003657	Calcineurin	0.103448	-0.0430376	0.249934	0.16632	0.160117	0.2752	0.316485	0.0953415	-0.245261	0.435944	0.583257	0.820956
SL003970	PTH	0.19528	-0.0816282	0.472189	0.166911	0.757532	0.0422726	0.317104	0.205407	0.0469884	0.363825	0.0110438	0.0851444
SL009791	hnRNP A/B	-0.0958041	-0.231893	0.040285	0.167655	0	0.346395	0.31751	-0.144585	-0.431384	0.142213	0.32311	0.645848
SL009216	dopa decarboxylase	0.109002	-0.0458348	0.263839	0.167656	0.215047	0.259025	0.31751	0.0535477	-0.107657	0.214753	0.515018	0.778901
SL010454	Contactin-4	0.142432	-0.0604963	0.345361	0.168925	0.545743	0.137886	0.31904	0.179204	-0.0843484	0.442757	0.182634	0.481782
SL000346	Cathepsin H	0.0957319	-0.0406844	0.232148	0.168998	0	0.963258	0.31904	0.0395404	-0.120988	0.200069	0.629262	0.847652
SL003710	Caspase-2	-0.0956587	-0.232745	0.0414277	0.171419	0	0.334637	0.322767	-0.10268	-0.336217	0.130857	0.388827	0.701886
SL000539	PHI	0.0949495	-0.0411503	0.231049	0.171512	0	0.414047	0.322767	-0.0418772	-0.216455	0.1327	0.638247	0.852365
SL005687	eIF-5A-1	-0.104021	-0.25341	0.045368	0.172334	0.164756	0.273871	0.323804	-0.102044	-0.334468	0.130379	0.389508	0.702055
SL005190	ILT-2	0.0943715	-0.0415873	0.23033	0.173688	0	0.949576	0.325836	-0.0113932	-0.171176	0.14839	0.888855	0.956549
SL010523	HIPK3	0.0944147	-0.0425413	0.231371	0.176644	0	0.776745	0.330862	0.0505677	-0.110817	0.211952	0.53913	0.794402
SL007221	STAT3	-0.094049	-0.230712	0.0426142	0.177398	0	0.76963	0.331754	-0.123752	-0.301718	0.0542132	0.172912	0.467489
SL003320	VEGF-D	0.168895	-0.0773336	0.415124	0.178821	0.692126	0.0715069	0.333892	0.223701	-0.010561	0.457963	0.0612613	0.26034
SL000428	FSH	0.177892	-0.0819703	0.437754	0.179687	0.723948	0.0570029	0.334987	0.18906	-0.0820941	0.460214	0.17176	0.465428
SL003685	PBEF	0.103475	-0.0478832	0.254833	0.180273	0.186202	0.267639	0.335555	-0.00821066	-0.168464	0.152042	0.920011	0.967072
SL005034	RAN	-0.0931063	-0.229445	0.0432325	0.180744	0	0.346327	0.335909	-0.06545	-0.269549	0.138649	0.529666	0.790201
SL003198	Tenascin	0.217904	-0.10142	0.537228	0.181072	0.819558	0.018566	0.335995	0.278398	-0.0322671	0.589062	0.0790213	0.298831
SL017189	Kininogen, HMW	-0.0917689	-0.227458	0.0439204	0.184987	0	0.377949	0.342728	-0.19832	-0.357592	-0.0390479	0.0146678	0.101907
SL008590	Olfactomedin-4	0.0918741	-0.0442354	0.227984	0.185842	0	0.596366	0.343294	0.0654341	-0.0948021	0.22567	0.423496	0.721977
SL005263	RAP	-0.164811	-0.408988	0.0793664	0.185867	0.683991	0.075257	0.343294	-0.163648	-0.58325	0.255954	0.444628	0.730324
SL000337	Calpain I	0.0919666	-0.0444781	0.228411	0.186482	0	0.586429	0.343899	0.159052	-0.00145279	0.319556	0.05211	0.235877
SL010393	KREM2	-0.0919098	-0.228877	0.0450576	0.188442	0	0.390692	0.346976	-0.115009	-0.276419	0.0464001	0.162553	0.455295
SL000252	a2-Macroglobulin	0.251464	-0.124177	0.627105	0.189503	0.869455	0.00564528	0.348394	0.273614	-0.276624	0.823853	0.329748	0.652399
SL003196	TARC	0.0907438	-0.0451919	0.22668	0.190747	0	0.563255	0.349734	0.104406	-0.0556194	0.264432	0.200986	0.506704
SL014148	ROBO3	-0.0911901	-0.227816	0.0454358	0.190817	0	0.443991	0.349734	-0.0726587	-0.233556	0.0882384	0.376108	0.690398
SL004589	Azurocidin	-0.11196	-0.28002	0.0560995	0.19165	0.341276	0.217909	0.350722	-0.0919095	-0.251591	0.0677721	0.259271	0.576963
SL001717	IL-10	-0.0909995	-0.228152	0.0461531	0.193458	0	0.55802	0.353489	-0.0889907	-0.250101	0.0721193	0.278983	0.599614
SL008421	ATS1	-0.0882332	-0.221368	0.0449013	0.193964	0	0.711954	0.353873	-0.0877496	-0.243983	0.0684835	0.270971	0.592385
SL000309	C1q	0.11504	-0.0587031	0.288783	0.194375	0.378838	0.204508	0.354083	0.199247	0.0306636	0.367831	0.0205331	0.123925
SL003753	DLC8	0.0855068	-0.0441764	0.21519	0.196252	0	0.854621	0.356767	0.11777	-0.0338832	0.269423	0.127995	0.397282
SL005229	ULBP-3	0.150611	-0.0779113	0.379134	0.196446	0.638175	0.096421	0.356767	0.0331184	-0.187675	0.253912	0.768766	0.910481
SL002803	PGP9.5	-0.0791876	-0.199531	0.0411557	0.19716	0	0.740623	0.357131	-0.0276157	-0.167102	0.111871	0.697991	0.873128
SL005178	IL-1F7	-0.13856	-0.349173	0.0720524	0.197244	0.582794	0.121576	0.357131	-0.102599	-0.542794	0.337596	0.6478	0.857277
SL004910	aldolase A	-0.113062	-0.285141	0.0590172	0.197828	0.368868	0.20812	0.357647	0.05727	-0.102105	0.216645	0.481249	0.760112
SL004159	TRAIL R4	0.0896109	-0.0471242	0.226346	0.198972	0	0.741334	0.359172	0.0131513	-0.14774	0.174042	0.872717	0.95285
SL006910	Cathepsin V	-0.219187	-0.554504	0.116129	0.200131	0.834065	0.0140931	0.360719	-0.0734627	-0.533309	0.386383	0.754194	0.903824
SL005185	IL-23 R	-0.0890462	-0.225598	0.0475052	0.201212	0	0.693234	0.361589	-0.112891	-0.273735	0.047953	0.168935	0.46377
SL003739	DcR3	0.0891648	-0.0475707	0.2259	0.201219	0	0.599946	0.361589	0.0976019	-0.0634757	0.25868	0.23499	0.551695
SL011509	PYY	0.169849	-0.0909296	0.430627	0.20176	0.726743	0.0557483	0.362017	0.0260034	-0.132992	0.184998	0.748552	0.90167
SL000145	IL-1 sRII	0.088443	-0.0475267	0.224413	0.202352	0	0.983658	0.362534	-0.0466471	-0.20559	0.112296	0.565146	0.80892
SL004855	contactin-1	0.0878238	-0.04743	0.223078	0.20314	0	0.859639	0.363402	0.292699	0.135821	0.449577	0.00025534	0.00544877
SL000546	PRL	-0.157206	-0.399757	0.0853447	0.203969	0.680978	0.0766483	0.364339	-0.131972	-0.492689	0.228746	0.473331	0.756191
SL004147	IL-10 Rb	0.0879268	-0.048268	0.224122	0.205748	0	0.758436	0.366968	0.0369576	-0.12317	0.197086	0.651009	0.859984
SL003171	FGF-4	-0.133241	-0.339895	0.0734122	0.206337	0.556504	0.1332	0.367464	-0.156706	-0.332774	0.0193627	0.0810856	0.302499
SL004133	BMP RII	0.0882865	-0.0487349	0.225308	0.206641	0	0.964344	0.367464	0.0914729	-0.103317	0.286263	0.357367	0.679315
SL000597	TNF-b	-0.08421	-0.215756	0.0473361	0.209594	0	0.82229	0.372071	-0.228639	-0.381952	-0.0753254	0.00346757	0.0416398
SL002782	Adrenomedullin	-0.0873498	-0.223879	0.049179	0.209854	0	0.661646	0.372071	0.0655366	-0.0939047	0.224978	0.420461	0.720876
SL003349	HIF-1a	-0.25352	-0.650765	0.143726	0.210993	0.882785	0.00349085	0.373537	-0.256677	-0.79173	0.278375	0.347093	0.674052
SL008102	MDHC	0.100124	-0.0571538	0.257401	0.212133	0.245013	0.249781	0.374471	-0.0330234	-0.19288	0.126833	0.685557	0.86876
SL008504	GNS	0.159626	-0.0911282	0.41038	0.212148	0.700151	0.0678201	0.374471	0.155002	-0.00515895	0.315163	0.0578502	0.253227
SL003308	IL-4 sR	-0.0859864	-0.221391	0.0494182	0.213263	0	0.872303	0.375885	-0.0889959	-0.248315	0.0703234	0.273588	0.593607
SL004156	TRAIL R1	-0.132325	-0.341068	0.0764176	0.21407	0.56707	0.128557	0.376751	-0.132684	-0.42801	0.162642	0.378548	0.692867
SL012469	GPC5	-0.0857835	-0.221321	0.0497541	0.214795	0	0.942412	0.377471	-0.0233139	-0.182717	0.136089	0.774372	0.913211
SL004899	HSP70 protein 8	-0.0921678	-0.238063	0.0537274	0.215647	0.123107	0.28557	0.378271	-0.11876	-0.27933	0.0418104	0.147166	0.427892
SL006374	BMX	-0.0985155	-0.254539	0.0575082	0.215884	0.25931	0.245262	0.378271	-0.031285	-0.18807	0.1255	0.695729	0.873128
SL004208	annexin I	-0.0858233	-0.222097	0.0504508	0.217071	0	0.782777	0.379795	-0.0900169	-0.299946	0.119912	0.400669	0.707254
SL000573	SAP	-0.20879	-0.541024	0.123444	0.218051	0.831278	0.0149115	0.380423	-0.138256	-0.325944	0.0494317	0.148805	0.431608
SL010490	CAMK1D	-0.205708	-0.533049	0.121633	0.218067	0.826782	0.0162735	0.380423	-0.127875	-0.687141	0.43139	0.65405	0.860188
SL005630	PSA6	-0.0803893	-0.208786	0.048007	0.21977	0	0.506674	0.382836	-0.0770618	-0.227031	0.0729072	0.313872	0.632508
SL013240	CRK	0.169698	-0.103417	0.442814	0.223296	0.749036	0.0459172	0.388411	0.181292	0.0220516	0.340532	0.025656	0.148829
SL008909	LGMN	-0.244719	-0.640567	0.151128	0.225634	0.882416	0.00354252	0.391603	-0.172814	-0.819907	0.474278	0.600673	0.829155
SL000515	MCP-2	-0.0841906	-0.220418	0.0520371	0.225786	0	0.667726	0.391603	-0.0225493	-0.182941	0.137842	0.782894	0.916687
SL012740	ATS15	0.0841405	-0.0529037	0.221185	0.22884	0	0.743786	0.396325	-0.0223935	-0.183356	0.138569	0.785104	0.916687
SL017289	PolyUbiquitin K48	0.0836443	-0.0531045	0.220393	0.230591	0	0.604976	0.398778	0.0343792	-0.126495	0.195253	0.675326	0.867757
SL000588	TMA	-0.0835784	-0.220626	0.053469	0.231976	0	0.77262	0.400594	-0.0730578	-0.234346	0.0882305	0.374652	0.690398
SL001997	IL-1 sRI	0.205053	-0.131738	0.541844	0.232747	0.836441	0.0134115	0.400805	0.475397	0.219816	0.730979	0.000266715	0.00559166
SL005437	MEPE	0.0750115	-0.0481974	0.19822	0.232769	0	0.758241	0.400805	0.0761855	-0.0670957	0.219467	0.297341	0.624352
SL004360	Neurotrophin-5	0.111244	-0.0716959	0.294184	0.233326	0.435447	0.18322	0.400878	0.17726	0.00932084	0.3452	0.0385701	0.197817
SL010927	IMB1	-0.131089	-0.346837	0.0846587	0.2337	0.597564	0.114946	0.400878	-0.1207	-0.397921	0.156521	0.393463	0.702913
SL010613	IL-17 RD	-0.0829731	-0.219565	0.0536191	0.233818	0	0.755779	0.400878	0.0437853	-0.116371	0.203942	0.592072	0.825549
SL002722	CD38	0.0819373	-0.0531419	0.217016	0.234484	0	0.602199	0.401444	0.120839	-0.0379908	0.279669	0.13592	0.408555
SL009768	CBX5	0.082345	-0.0544903	0.21918	0.238211	0	0.333057	0.407241	0.0805844	-0.155724	0.316893	0.503895	0.774809
SL004343	Flt3 ligand	0.0816629	-0.0541494	0.217475	0.238593	0	0.83441	0.407312	0.020523	-0.139214	0.18026	0.801183	0.923875
SL003728	cIAP-2	-0.0813614	-0.217339	0.0546159	0.240902	0	0.377779	0.410667	-0.101911	-0.274054	0.070233	0.24592	0.562977
SL010455	Contactin-5	0.0811094	-0.0554451	0.217664	0.244359	0	0.838409	0.415967	0.179072	0.0189998	0.339143	0.028336	0.158231
SL004327	BAFF	0.20978	-0.145721	0.565281	0.247449	0.852407	0.00924243	0.420627	0.158	-0.0820341	0.398034	0.197007	0.501968
SL008936	CHL1	0.0797753	-0.0557794	0.21533	0.248722	0	0.365604	0.422192	0.397306	0.242169	0.552443	5.18173e-07	6.87086e-05
SL007228	KPCI	-0.0742372	-0.200884	0.0524095	0.250604	0	0.906656	0.424783	-0.0605716	-0.208257	0.0871139	0.421479	0.721587
SL010462	FCN1	-0.0794671	-0.215231	0.0562967	0.251286	0	0.485656	0.425335	-0.0905734	-0.365615	0.184468	0.518647	0.780584
SL000300	b-Endorphin	-0.100143	-0.272607	0.0723206	0.255088	0.378665	0.204571	0.43034	-0.0396165	-0.300318	0.221085	0.765826	0.910213
SL001691	FGF7	0.0792953	-0.057322	0.215913	0.255287	0	0.512739	0.43034	0.0844669	-0.0764674	0.245401	0.303624	0.627534
SL007828	NRG4	-0.0784362	-0.213671	0.0567981	0.255629	0	0.821183	0.43034	-0.0741999	-0.233302	0.0849021	0.360684	0.680785
SL004850	IL-17 sR	0.0789606	-0.0571935	0.215115	0.255683	0	0.912301	0.43034	0.13351	-0.0266986	0.293719	0.102398	0.348354
SL004336	FGF-18	-0.0788172	-0.215822	0.0581874	0.259512	0	0.835539	0.43617	-0.0854998	-0.264568	0.0935681	0.349363	0.674052
SL005222	SREC-II	-0.108757	-0.298288	0.0807746	0.260731	0.490599	0.161183	0.437603	-0.0326315	-0.190289	0.125026	0.684987	0.86876
SL007242	MP2K3	0.0777654	-0.0585984	0.214129	0.263684	0	0.511101	0.441939	0.0721109	-0.0885119	0.232734	0.378904	0.692867
SL008381	CATF	0.0773965	-0.059104	0.213897	0.266435	0	0.498273	0.445924	0.23854	0.078584	0.398496	0.00346826	0.0416398
SL011532	ETHE1	-0.0772684	-0.213743	0.0592063	0.267137	0	0.469171	0.446474	0.0203739	-0.254841	0.295589	0.884636	0.956549
SL004687	TSLP	-0.114688	-0.317508	0.0881315	0.267733	0.540212	0.140277	0.446845	-0.226947	-0.387818	-0.0660771	0.00569202	0.0553006
SL008099	CAPG	0.0762551	-0.0598213	0.212331	0.272059	0	0.378002	0.453432	0.0118431	-0.200931	0.224617	0.913129	0.966509
SL013490	BOC	-0.076323	-0.212818	0.0601716	0.273104	0	0.762781	0.454539	0.0616804	-0.0980971	0.221458	0.449276	0.733449
SL002702	PIM1	0.0762983	-0.0604625	0.213059	0.274193	0	0.774715	0.455718	0.019085	-0.190186	0.228356	0.858139	0.951276
SL004860	HTRA2	0.168204	-0.133968	0.470377	0.275266	0.797163	0.0263935	0.456866	0.204977	0.0467432	0.36321	0.0111185	0.0851709
SL000645	MMP-10	0.123965	-0.0992796	0.34721	0.276443	0.625253	0.102355	0.458183	0.225042	0.0656559	0.384429	0.00565173	0.0553006
SL005102	SHBG	0.0750593	-0.0606882	0.210807	0.278485	0	0.752965	0.460571	0.32578	0.170108	0.481452	4.10174e-05	0.00158115
SL000442	HGH	-0.0750894	-0.210939	0.0607607	0.278655	0	0.672129	0.460571	-0.0923936	-0.252258	0.0674712	0.257316	0.575202
SL010513	PRKACA	-0.145515	-0.409145	0.118116	0.279329	0.732524	0.0531672	0.461047	-0.0753305	-0.351884	0.201223	0.593428	0.825549
SL004864	Cadherin-12	-0.0751564	-0.212256	0.0619432	0.28263	0	0.971898	0.465853	-0.0807792	-0.2423	0.0807419	0.326983	0.649078
SL008063	PPAC	0.0744982	-0.0616094	0.210606	0.283369	0	0.350086	0.466427	0.145444	-0.0746014	0.365489	0.195154	0.501931
SL004726	CD97	0.0698688	-0.0581123	0.19785	0.284618	0	0.677331	0.467714	0.076125	-0.187543	0.339793	0.57148	0.813868
SL005258	PLK-1	-0.0733873	-0.20794	0.0611659	0.285073	0	0.987878	0.467714	-0.0535468	-0.211903	0.104809	0.507494	0.774809
SL009792	PUR8	-0.0742059	-0.210421	0.0620095	0.285644	0	0.782774	0.467714	0.0148666	-0.145325	0.175059	0.855666	0.950638
SL011406	PDE7A	-0.0744998	-0.211275	0.0622757	0.285716	0	0.498034	0.467714	-0.13043	-0.383587	0.122727	0.31259	0.632055
SL014028	ENTP5	0.0736347	-0.0623352	0.209605	0.288498	0	0.680925	0.471622	0.149136	-0.010777	0.309049	0.0675681	0.275576
SL004821	S100A4	-0.0737027	-0.210138	0.0627327	0.289701	0	0.746483	0.472942	0.013525	-0.146643	0.173693	0.868547	0.95285
SL018548	alpha-1-antichymotrypsin complex	-0.0731164	-0.208958	0.0627251	0.29145	0	0.841124	0.475147	-0.0504264	-0.21005	0.109197	0.535805	0.793232
SL004862	PD-L2	0.0986543	-0.0847905	0.282099	0.291863	0.445346	0.179359	0.475172	0.223561	-0.0165068	0.463628	0.067971	0.276277
SL017610	Gro-b/g	-0.0735962	-0.210666	0.0634737	0.292638	0	0.975536	0.475785	-0.0924311	-0.253973	0.0691107	0.262095	0.580858
SL000506	Luteinizing hormone	0.130192	-0.112682	0.373067	0.293425	0.682194	0.0760865	0.476417	0.0728431	-0.16152	0.307206	0.542404	0.795709
SL003304	IGF-I sR	0.0943296	-0.0822052	0.270864	0.294967	0.398725	0.197181	0.478271	0.356464	0.198808	0.51412	9.35706e-06	0.000559084
SL004305	Topoisomerase I	-0.0727717	-0.209832	0.0642885	0.298044	0	0.735452	0.482605	-0.180155	-0.36065	0.000340683	0.050434	0.231802
SL004142	Ephrin-B3	0.072548	-0.064277	0.209373	0.298702	0	0.569647	0.483016	0.049623	-0.111642	0.210888	0.546442	0.798048
SL000347	CBG	-0.0702821	-0.203129	0.0625644	0.299776	0	0.384719	0.484098	-0.0116457	-0.167482	0.14419	0.883551	0.956549
SL009213	Cathepsin A	0.0790719	-0.070686	0.22883	0.300736	0.177487	0.270189	0.484903	0.0399147	-0.148832	0.228662	0.678525	0.86876
SL010492	CAMK2B	-0.068765	-0.199097	0.0615667	0.301086	0	0.464465	0.484903	-0.0886021	-0.241169	0.0639653	0.255024	0.571993
SL008931	CD177	-0.0716796	-0.207921	0.0645622	0.302458	0	0.755271	0.486456	-0.0261397	-0.186431	0.134152	0.749254	0.90167
SL004644	EDA	-0.0717348	-0.208282	0.0648129	0.30317	0	0.667843	0.486946	0.0609148	-0.0988724	0.220702	0.454951	0.73785
SL010617	TPSB2	0.0715509	-0.0648755	0.207977	0.303981	0	0.858291	0.487108	0.082466	-0.0778639	0.242796	0.313401	0.632508
SL012248	FAK1	0.0717642	-0.0650984	0.208627	0.304086	0	0.375718	0.487108	0.0333606	-0.135735	0.202457	0.698995	0.873128
SL017614	PKB a/b/g	-0.150951	-0.439812	0.13791	0.305728	0.776295	0.0344917	0.489083	-0.106997	-0.636291	0.422296	0.69195	0.873128
SL004908	Tropomyosin 2	0.0704918	-0.0646662	0.20565	0.306676	0	0.590858	0.489944	0.0935949	-0.111182	0.298371	0.370349	0.688286
SL005193	JAM-B	-0.106187	-0.310125	0.0977509	0.307482	0.550089	0.135998	0.490576	-0.08667	-0.481623	0.308283	0.667122	0.862915
SL004637	MSP R	-0.10847	-0.318558	0.101618	0.311564	0.574449	0.125291	0.496425	-0.14295	-0.449275	0.163376	0.360383	0.680785
SL005183	IL-22BP	-0.0699857	-0.206081	0.0661095	0.313506	0	0.826041	0.498854	-0.0734723	-0.233629	0.0866848	0.36858	0.688208
SL004182	GV	-0.0704748	-0.207694	0.066744	0.314114	0	0.570664	0.499158	-0.145098	-0.306517	0.0163205	0.0781034	0.29819
SL009207	Dynactin subunit 2	0.0700628	-0.066889	0.207015	0.316009	0	0.32628	0.501421	0.142392	-0.0188774	0.303661	0.0835338	0.307147
SL004932	Peroxiredoxin-5	-0.069791	-0.206315	0.0667334	0.316378	0	0.643266	0.501421	-0.0598	-0.220578	0.100978	0.466005	0.748489
SL000009	ERBB2	0.0699409	-0.0671916	0.207073	0.31749	0	0.953568	0.502518	0.138769	-0.0227254	0.300263	0.0921509	0.327739
SL005200	MICB	0.0697368	-0.0671907	0.206664	0.31818	0	0.773374	0.502944	-0.0504361	-0.411591	0.310719	0.784305	0.916687
SL000409	ERK-1	-0.0691811	-0.205385	0.0670227	0.319488	0	0.946977	0.504343	-0.0600007	-0.220424	0.100422	0.463524	0.747518
SL010830	41	-0.0696976	-0.207059	0.0676641	0.319985	0.0195553	0.312532	0.504461	0.00587713	-0.204395	0.216149	0.956313	0.983178
SL005164	Galectin-2	0.0811978	-0.0791809	0.241577	0.321048	0.268494	0.242321	0.505471	0.14074	-0.0546329	0.336112	0.157982	0.448429
SL014735	IMDH1	-0.0684124	-0.204817	0.0679921	0.325607	0	0.720429	0.511965	-0.0943823	-0.263561	0.074796	0.274202	0.593607
SL003755	Mcl-1	0.111455	-0.110965	0.333875	0.32603	0.621775	0.103946	0.511965	0.0345303	-0.315128	0.384189	0.846524	0.947212
SL000104	Bcl-2	-0.0671962	-0.201573	0.0671802	0.327038	0	0.972094	0.512386	-0.115144	-0.272886	0.0425976	0.152521	0.439188
SL002071	Gastrin-releasing peptide	-0.069612	-0.208853	0.0696293	0.327155	0.069719	0.299831	0.512386	-0.0403636	-0.197927	0.1172	0.615604	0.835962
SL013989	RSPO2	-0.0895881	-0.269079	0.0899028	0.327944	0.412097	0.192162	0.512439	-0.0671052	-0.22848	0.0942696	0.415061	0.72014
SL008591	TFF1	0.120013	-0.120486	0.360513	0.328047	0.6772	0.0783935	0.512439	0.171752	-0.146884	0.490387	0.290756	0.617147
SL004594	Troponin I, skeletal, fast twitch	0.177019	-0.179209	0.533246	0.330078	0.85231	0.00926551	0.514939	0.166971	-0.0902966	0.424239	0.203355	0.50928
SL010509	PAK6	0.0673324	-0.0690759	0.203741	0.333316	0	0.973825	0.519312	-0.0408725	-0.201016	0.119271	0.616912	0.836315
SL003803	ERBB4	-0.0671261	-0.204146	0.0698939	0.336961	0	0.386087	0.524033	-0.0619122	-0.32646	0.202635	0.646456	0.857277
SL005177	IL-1F6	0.0668428	-0.0696728	0.203358	0.337223	0	0.972671	0.524033	-0.0196406	-0.180009	0.140727	0.810298	0.928096
SL002650	M2-PK	-0.141465	-0.431809	0.14888	0.339602	0.778385	0.0336513	0.527044	-0.150547	-0.40207	0.100976	0.240748	0.555809
SL003186	Lymphotactin	-0.0664035	-0.203208	0.0704009	0.341428	0	0.966347	0.529191	-0.133469	-0.294529	0.0275906	0.104331	0.35061
SL014268	OX2G	0.0656437	-0.0699062	0.201194	0.342536	0	0.487821	0.530222	0.149886	-0.0149066	0.314678	0.0746397	0.291485
SL004364	TACI	-0.0658738	-0.202242	0.0704941	0.343751	0	0.330823	0.531413	0.0149194	-0.145582	0.175421	0.855435	0.950638
SL002075	IFN-aA	-0.0658323	-0.202579	0.0709145	0.345394	0	0.746581	0.533264	0.0533535	-0.299943	0.40665	0.767241	0.91048
SL005207	NKp46	0.0654667	-0.0709477	0.201881	0.346906	0	0.445428	0.534907	0.0835046	-0.0771785	0.244188	0.30841	0.627534
SL006460	GP1BA	-0.0823585	-0.254543	0.0898261	0.348511	0.372722	0.206729	0.53669	0.0539094	-0.172758	0.280577	0.64111	0.854099
SL008865	PSA2	0.147414	-0.161361	0.45619	0.349419	0.802795	0.0243313	0.537395	0.138731	-0.020583	0.298044	0.0878702	0.318043
SL011232	CDC37	0.0652797	-0.0717189	0.202278	0.350345	0	0.368561	0.538126	0.0357954	-0.125684	0.197275	0.663949	0.862915
SL000496	Lactoferrin	-0.063996	-0.200234	0.0722419	0.357224	0	0.686784	0.547988	-0.0841132	-0.244541	0.0763143	0.304128	0.627534
SL010375	ASAH2	0.0984357	-0.111541	0.308412	0.35819	0.572872	0.125991	0.548765	0.0482432	-0.282548	0.379034	0.774997	0.913211
SL010449	Carbonic Anhydrase X	-0.0567013	-0.177797	0.0643948	0.358765	0	0.44303	0.548942	-0.0627158	-0.349837	0.224405	0.668568	0.862915
SL000480	IL-4	-0.0623914	-0.196449	0.0716661	0.361673	0	0.548991	0.552684	-0.0684405	-0.257729	0.120848	0.478537	0.760112
SL004339	FGF-5	0.0675675	-0.0786545	0.21379	0.365107	0.123541	0.285451	0.557219	0.0251601	-0.223766	0.274086	0.842965	0.947212
SL000398	Cytochrome P450 3A4	-0.108995	-0.346313	0.128324	0.368032	0.664894	0.0840846	0.56081	-0.165307	-0.463133	0.132518	0.276651	0.596748
SL009988	ADAM12	0.061718	-0.0728633	0.196299	0.368746	0	0.347985	0.56081	-0.053127	-0.210791	0.104537	0.508975	0.774809
SL004859	GITR	0.0627731	-0.0741437	0.19969	0.368867	0	0.740306	0.56081	0.0630204	-0.127726	0.253767	0.517277	0.779504
SL009431	HINT1	0.0648768	-0.0770084	0.206762	0.370151	0.0772075	0.297879	0.562046	0.038101	-0.12168	0.197882	0.640237	0.853887
SL000125	IL-1a	-0.061353	-0.197375	0.0746691	0.376672	0	0.715136	0.571222	-0.122322	-0.282285	0.0376411	0.133935	0.406225
SL001766	HCG	0.157396	-0.192646	0.507438	0.378158	0.84788	0.0103493	0.572006	0.104787	-0.240912	0.450487	0.552447	0.802156
SL004148	IL-12 Rb1	-0.128231	-0.413548	0.157087	0.378389	0.768281	0.0377651	0.572006	-0.140599	-0.509497	0.228299	0.455059	0.73785
SL002078	TGF-b R II	-0.061381	-0.198023	0.0752614	0.378625	0	0.33786	0.572006	0.0148578	-0.334842	0.364558	0.933634	0.972705
SL004868	Carbonic anhydrase VII	0.0558751	-0.0687083	0.180458	0.379382	0	0.34888	0.572089	0.0920104	-0.0526733	0.236694	0.212609	0.518666
SL006528	SEPR	0.0605519	-0.0745315	0.195635	0.379637	0	0.578671	0.572089	0.113491	-0.0563104	0.283291	0.190199	0.492359
SL000247	6-Phosphogluconate dehydrogenase	-0.163803	-0.530771	0.203164	0.381644	0.861347	0.00724073	0.574195	-0.195314	-0.395003	0.00437473	0.0552347	0.246289
SL001815	Mn SOD	-0.0605149	-0.196186	0.0751561	0.381996	0	0.879502	0.574195	0.0857957	-0.073017	0.244608	0.289675	0.615946
SL006921	PDK1	-0.0606968	-0.197293	0.0758995	0.383801	0	0.9976	0.576184	-0.0727741	-0.233652	0.0881037	0.375293	0.690398
SL004852	B7-H1	0.0718398	-0.0903354	0.234015	0.385275	0.286451	0.236482	0.577671	0.0109198	-0.347456	0.369296	0.952378	0.983089
SL016551	CK2-A2:B	-0.0604422	-0.197333	0.0764489	0.386824	0	0.739845	0.579266	-0.00630828	-0.167571	0.154955	0.938886	0.977325
SL008113	ATPO	0.0602112	-0.0765894	0.197012	0.388327	0	0.737969	0.580701	0.0450169	-0.116114	0.206147	0.583982	0.821009
SL005572	Gelsolin	-0.059632	-0.195345	0.0760812	0.389127	0	0.500578	0.580701	0.187507	-0.0203881	0.395402	0.0771024	0.297217
SL004652	WIF-1	0.0570724	-0.0728886	0.187033	0.389393	0	0.977104	0.580701	0.205926	0.0552597	0.356593	0.00738831	0.0662707
SL000345	Cathepsin G	-0.0600245	-0.196804	0.0767547	0.389726	0	0.888106	0.580701	-0.0451956	-0.206447	0.116056	0.582773	0.820956
SL001729	G-CSF	0.0600244	-0.0769775	0.197026	0.390497	0	0.810712	0.581061	0.047261	-0.14984	0.244361	0.638382	0.852365
SL004248	GDNF	-0.059648	-0.196038	0.076742	0.391357	0	0.425346	0.581061	-0.0507652	-0.222329	0.120799	0.561951	0.80892
SL007272	HXK2	-0.0594832	-0.195585	0.0766192	0.391668	0	0.574384	0.581061	-0.0791155	-0.242687	0.0844556	0.343135	0.668918
SL004064	GIB	0.0583181	-0.0751875	0.191824	0.391913	0	0.766878	0.581061	0.0938465	-0.0628923	0.250585	0.240588	0.555809
SL008085	3HIDH	-0.0865879	-0.286877	0.113701	0.396816	0.530348	0.144513	0.587603	-0.0887083	-0.42099	0.243574	0.600803	0.829155
SL016129	FAM107B	0.057816	-0.0760731	0.191705	0.397357	0	0.376042	0.587675	0.0146462	-0.212289	0.241582	0.899341	0.961561
SL004737	Tropomyosin 1 alpha chain	-0.114363	-0.380131	0.151405	0.399007	0.737021	0.0511734	0.589387	-0.122328	-0.445706	0.201049	0.458438	0.741318
SL004118	TrATPase	0.0584998	-0.0776105	0.19461	0.399572	0	0.861243	0.589491	0.178051	0.0186258	0.337476	0.0286006	0.158966
SL001905	Mesothelin	0.0562694	-0.075678	0.188217	0.403249	0	0.893409	0.593862	0.0924513	-0.0620689	0.246972	0.240928	0.555809
SL010460	FCG2B	0.145877	-0.196956	0.48871	0.404296	0.840382	0.0123148	0.593862	0.138712	-0.271274	0.548699	0.507252	0.774809
SL001796	Myeloperoxidase	-0.0580809	-0.194596	0.0784345	0.404353	0	0.381631	0.593862	-0.105434	-0.266095	0.0552262	0.19836	0.503271
SL010348	FN1.4	0.11302	-0.153135	0.379175	0.405252	0.737049	0.051161	0.593862	-0.0229742	-0.445567	0.399619	0.915144	0.967072
SL004783	S100A12	-0.0579112	-0.194365	0.0785427	0.405516	0	0.561891	0.593862	-0.116053	-0.276673	0.0445677	0.156738	0.445957
SL007774	JAG2	-0.0572391	-0.192234	0.0777555	0.405948	0	0.500502	0.593862	-0.149829	-0.416695	0.117037	0.271159	0.592385
SL007122	IDE	-0.075178	-0.252505	0.102149	0.406013	0.408128	0.19366	0.593862	-0.00216167	-0.392373	0.38805	0.991337	0.996612
SL004690	WISP-3	-0.0674996	-0.228155	0.0931556	0.410233	0.292891	0.234359	0.599302	-0.0535289	-0.211514	0.104456	0.50664	0.774809
SL004649	OX40 Ligand	0.0573173	-0.0795582	0.194193	0.411792	0	0.84931	0.600844	0.081271	-0.0799696	0.242512	0.323205	0.645848
SL000615	Vasoactive Intestinal Peptide	0.0571282	-0.0797802	0.194037	0.413449	0	0.333542	0.602526	0.0628318	-0.0981622	0.223826	0.444317	0.730324
SL011535	RBM39	0.0539781	-0.0755995	0.183556	0.414236	0	0.673377	0.602938	0.0236796	-0.127889	0.175248	0.759449	0.90573
SL003951	BDNF	-0.0568117	-0.193424	0.0798003	0.41503	0	0.673286	0.603359	0.0425181	-0.118042	0.203079	0.603748	0.829155
SL002646	MMP-14	0.0559917	-0.0794915	0.191475	0.417939	0	0.388243	0.606849	0.0779746	-0.0813058	0.237255	0.337314	0.661279
SL001791	Osteocalcin	-0.0673702	-0.231272	0.0965314	0.420459	0.31905	0.225577	0.609402	-0.0902064	-0.248192	0.0677796	0.2631	0.581154
SL010371	CD39	-0.169371	-0.581653	0.242911	0.420717	0.890345	0.00252899	0.609402	-0.183001	-0.772788	0.406785	0.543091	0.795709
SL003785	GAPDH, liver	-0.072665	-0.250115	0.104785	0.422209	0.404137	0.195159	0.610765	-0.0686941	-0.329016	0.191628	0.605018	0.829155
SL018947	UBP25	0.0664714	-0.0960189	0.228962	0.42268	0.286831	0.236357	0.610765	0.0902372	-0.0709106	0.251385	0.272418	0.593607
SL002684	CSF-1	0.131048	-0.191833	0.45393	0.426327	0.826073	0.0164931	0.615291	0.00523454	-0.170125	0.180594	0.953346	0.983089
SL002505	ANP	-0.0556265	-0.192863	0.0816099	0.42694	0	0.812329	0.615432	-0.0133213	-0.175041	0.148398	0.871741	0.95285
SL003177	sICAM-2	-0.0955491	-0.331569	0.140471	0.427509	0.664586	0.0842268	0.615509	0.189074	0.0320396	0.346109	0.0182821	0.115593
SL000598	Tpo	0.0551223	-0.0815267	0.191771	0.429165	0	0.782562	0.616635	-0.00822518	-0.168743	0.152292	0.920002	0.967072
SL000638	Cadherin-2	0.0531285	-0.0786228	0.18488	0.429322	0	0.709346	0.616635	0.0236044	-0.139304	0.186512	0.776421	0.913211
SL006542	FCN2	-0.101755	-0.355704	0.152195	0.432258	0.708934	0.0638037	0.620106	-0.127304	-0.578429	0.323821	0.580205	0.819556
SL004066	GIIE	-0.0893705	-0.313788	0.135047	0.435084	0.624163	0.102854	0.623019	-0.124475	-0.34902	0.10007	0.277262	0.596988
SL003648	Rab GDP dissociation inhibitor beta	0.0544172	-0.0823032	0.191138	0.435331	0	0.548285	0.623019	-0.0565147	-0.217027	0.103998	0.490143	0.762012
SL012769	FAM3D	-0.0540158	-0.190036	0.082004	0.436372	0	0.869787	0.623357	-0.047515	-0.207779	0.112749	0.561181	0.80892
SL005225	TrkA	-0.0538004	-0.189348	0.0817477	0.436611	0	0.622349	0.623357	-0.0802218	-0.286045	0.125602	0.444917	0.730324
SL005361	Apo D	-0.0705173	-0.24941	0.108376	0.439764	0.420025	0.189152	0.626459	-0.0108753	-0.603246	0.581495	0.971296	0.988181
SL018971	ZNRF3	0.0490075	-0.0755243	0.173539	0.440522	0	0.492389	0.626459	0.0918103	-0.0530697	0.23669	0.214227	0.519271
SL000420	Ferritin	0.150974	-0.232844	0.534793	0.440737	0.873062	0.00500436	0.626459	0.189413	-0.113983	0.49281	0.221094	0.527359
SL000474	IL-16	-0.0642122	-0.227672	0.0992478	0.441338	0.292803	0.234388	0.626459	-0.120816	-0.282297	0.0406652	0.142541	0.418808
SL000592	TIMP-2	0.125827	-0.194663	0.446317	0.441597	0.81826	0.0189906	0.626459	0.152595	-0.306942	0.612132	0.515155	0.778901
SL018887	QORL1	0.0534524	-0.0829215	0.189826	0.442358	0	0.877521	0.626459	-0.0446017	-0.314153	0.22495	0.745705	0.90167
SL004136	Dtk	0.0536194	-0.0832091	0.190448	0.442453	0	0.813026	0.626459	0.025686	-0.135525	0.186897	0.754825	0.903824
SL000004	bFGF	-0.0695994	-0.247818	0.108619	0.444021	0.414199	0.191367	0.627935	-0.00436708	-0.16398	0.155245	0.957233	0.983178
SL003303	CCL28	0.0530309	-0.0831938	0.189256	0.445467	0	0.864213	0.628793	0.132238	-0.0398907	0.304368	0.132133	0.402946
SL005217	Siglec-6	0.0869017	-0.136434	0.310238	0.44568	0.620637	0.104467	0.628793	0.0342097	-0.126996	0.195415	0.677462	0.86876
SL017528	RNase H1	-0.052698	-0.189313	0.0839166	0.449625	0	0.920477	0.63281	0.00435746	-0.156559	0.165274	0.957673	0.983178
SL004008	Proteinase-3	-0.05242	-0.188422	0.0835821	0.449986	0	0.667309	0.63281	-0.0358414	-0.195708	0.124025	0.660361	0.862915
SL000020	Apo B	-0.0525216	-0.188827	0.0837833	0.450116	0	0.990454	0.63281	0.0364717	-0.163684	0.236627	0.720988	0.889144
SL006892	ABL1	-0.0519875	-0.187753	0.0837783	0.452948	0	0.948527	0.636043	-0.0130536	-0.172805	0.146698	0.872761	0.95285
SL006912	FGR	-0.0517575	-0.187375	0.0838596	0.454454	0	0.489341	0.63741	-0.0550615	-0.214649	0.104526	0.498892	0.769259
SL004661	Aggrecan	0.0590365	-0.0959515	0.214025	0.455323	0.216749	0.258508	0.637546	0.238944	0.0791103	0.398778	0.00338902	0.0416398
SL008611	ASAHL	0.0519138	-0.0844644	0.188292	0.455619	0	0.835989	0.637546	0.13415	-0.0258003	0.2941	0.100214	0.345117
SL001716	IL-12	-0.0519345	-0.188951	0.0850822	0.457542	0	0.578872	0.639203	-0.0541199	-0.21561	0.10737	0.511284	0.777334
SL003674	BCL2-like 1 protein	0.0515705	-0.084586	0.187727	0.457873	0	0.649335	0.639203	0.118167	-0.102612	0.338946	0.294166	0.622173
SL005233	XEDAR	0.111071	-0.184574	0.406715	0.461524	0.790959	0.0287295	0.643549	0.116247	-0.245539	0.478032	0.528849	0.790201
SL015510	UCRP	0.0747805	-0.125119	0.27468	0.463434	0.528711	0.145212	0.645459	0.101091	-0.0593427	0.261524	0.216833	0.524526
SL000563	RANTES	0.0504793	-0.084748	0.185707	0.464389	0	0.832997	0.646036	0.0884536	-0.0704984	0.247406	0.275413	0.595152
SL006916	LCK	-0.0685135	-0.252454	0.115427	0.465366	0.440275	0.181342	0.646643	-0.144453	-0.372089	0.0831827	0.21359	0.518781
SL019978	IFNA7	0.0505583	-0.0860534	0.18717	0.468232	0	0.911425	0.649177	0.0989138	-0.0619411	0.259769	0.228114	0.537808
SL004829	S100A7	0.0499791	-0.085081	0.185039	0.468276	0	0.853141	0.649177	0.00224364	-0.156531	0.161019	0.977905	0.990601
SL004516	MBL	0.0867792	-0.148922	0.322481	0.470535	0.664038	0.0844803	0.651553	0.123074	-0.256867	0.503015	0.525502	0.788913
SL006803	ANGL3	-0.0619929	-0.231974	0.107988	0.474728	0.34851	0.215372	0.656598	-0.0873739	-0.248343	0.0735949	0.287388	0.614041
SL003169	ENA-78	0.0501347	-0.0880855	0.188355	0.47714	0.0174464	0.313052	0.65917	0.00494038	-0.221978	0.231858	0.965963	0.987447
SL004851	ALK-1	0.0493425	-0.0877595	0.186445	0.480571	0	0.928396	0.662141	-0.0258144	-0.187179	0.13555	0.753866	0.903824
SL000377	CK-BB	-0.0492461	-0.186113	0.0876209	0.480677	0	0.442504	0.662141	-0.0566073	-0.217893	0.104678	0.491517	0.762012
SL000527	MMP-9	-0.0489664	-0.185142	0.0872089	0.480953	0	0.815115	0.662141	-0.158673	-0.32692	0.00957311	0.0645382	0.269661
SL007453	MK11	0.0489989	-0.087969	0.185967	0.483204	0	0.639781	0.664476	0.101049	-0.0602759	0.262374	0.219574	0.527359
SL005167	Galectin-8	-0.0487114	-0.185504	0.0880811	0.485216	0	0.72775	0.666475	-0.0183147	-0.179443	0.142814	0.823707	0.934786
SL001880	IFN-b	-0.0485383	-0.185518	0.0884415	0.487364	0	0.417577	0.668657	-0.00608719	-0.211967	0.199793	0.953789	0.983089
SL011528	RS7	-0.0484243	-0.18535	0.0885018	0.488218	0	0.442649	0.66906	-0.174047	-0.50222	0.154127	0.298587	0.624889
SL000057	Thymidine kinase	-0.0483697	-0.18553	0.0887903	0.489449	0	0.828085	0.669265	-0.103011	-0.264561	0.0585392	0.21139	0.518666
SL014048	CONA1	0.0483843	-0.0888291	0.185598	0.489488	0	0.328565	0.669265	0.0157503	-0.14563	0.177131	0.8483	0.947212
SL006993	MK13	0.0471661	-0.0876442	0.181976	0.492881	0	0.41788	0.673135	0.0754069	-0.0831705	0.233984	0.351334	0.674991
SL000601	Transferrin	-0.0713524	-0.276315	0.13361	0.495042	0.549677	0.136178	0.675314	0.0626093	-0.0969028	0.222121	0.441718	0.730324
SL016548	AMPK a1b1g1	-0.0466502	-0.181299	0.0879988	0.49711	0	0.890634	0.677039	-0.0192191	-0.177249	0.138811	0.811598	0.928096
SL011498	PACAP-38	-0.0471611	-0.183389	0.089067	0.49744	0	0.791841	0.677039	-0.0458321	-0.206249	0.114585	0.575497	0.813868
SL004820	Phosphoglycerate mutase 1	0.0701918	-0.133334	0.273718	0.499072	0.546369	0.137614	0.678488	-0.143394	-0.304597	0.0178087	0.081257	0.302499
SL011071	PDGF-CC	-0.0465422	-0.182619	0.0895345	0.502625	0	0.968501	0.682066	-0.00915907	-0.169301	0.150983	0.910746	0.965698
SL010372	Enterokinase	-0.046437	-0.182276	0.0894022	0.502846	0	0.466205	0.682066	-0.0667116	-0.255699	0.122276	0.489027	0.762012
SL005235	NANOG	-0.0466148	-0.183426	0.0901963	0.504257	0	0.53956	0.683206	-0.0463488	-0.207473	0.114775	0.57289	0.813868
SL000530	OSM	-0.132552	-0.524219	0.259115	0.507132	0.878084	0.00418357	0.68567	-0.105328	-0.746796	0.53614	0.747587	0.90167
SL006911	CHK1	-0.0463785	-0.183463	0.0907061	0.507269	0	0.911714	0.68567	-0.0615975	-0.223102	0.0999066	0.454745	0.73785
SL013165	HMGN1	0.0460403	-0.0902142	0.182295	0.507798	0	0.780289	0.68567	-0.123438	-0.282818	0.0359424	0.129023	0.399436
SL010519	ZAP70	-0.0857055	-0.340833	0.169422	0.510272	0.712887	0.062004	0.687589	-0.0819455	-0.695756	0.531865	0.793583	0.917152
SL016128	TXD12	0.0458012	-0.0905708	0.182173	0.510369	0	0.933612	0.687589	0.16714	0.0075088	0.326772	0.0401544	0.202466
SL004457	Protease nexin I	-0.117277	-0.468059	0.233505	0.512291	0.847246	0.0105093	0.689401	-0.15927	-0.526437	0.207898	0.395219	0.702913
SL000325	C9	0.04541	-0.0908769	0.181697	0.513725	0	0.342937	0.690553	0.141494	-0.0172994	0.300288	0.0807344	0.302438
SL007145	NR1D1	0.0454464	-0.0915154	0.182408	0.515465	0	0.818206	0.692113	0.0580263	-0.103298	0.219351	0.480826	0.760112
SL014269	KI3L2	-0.0534306	-0.215485	0.108624	0.518141	0.284533	0.237111	0.694187	-0.0392077	-0.319329	0.240914	0.783831	0.916687
SL000508	Lymphotoxin a2/b1	0.136464	-0.27746	0.550387	0.518171	0.890327	0.00253106	0.694187	0.0646574	-0.325701	0.455016	0.745453	0.90167
SL002688	Osteopontin	0.0436612	-0.0904323	0.177755	0.523364	0	0.994388	0.698303	0.215476	-0.0122456	0.443199	0.0636579	0.267856
SL000540	Plasmin	-0.0763076	-0.311406	0.158791	0.524672	0.658869	0.0868708	0.698303	-0.1476	-0.308169	0.0129692	0.0715994	0.285204
SL008639	IDS	0.0441953	-0.0920273	0.180418	0.524855	0	0.52839	0.698303	0.221942	-0.0148886	0.458773	0.066247	0.272983
SL014009	HDGR2	0.05482	-0.114183	0.223823	0.524934	0.339735	0.218447	0.698303	-0.0735687	-0.290579	0.143442	0.506404	0.774809
SL014094	GP114	-0.044463	-0.181575	0.0926494	0.525051	0	0.6233	0.698303	-0.0136214	-0.175091	0.147848	0.868676	0.95285
SL005197	LIMP II	-0.0442832	-0.181194	0.0926271	0.526117	0	0.494107	0.698303	-0.111384	-0.272573	0.0498058	0.175623	0.472678
SL000324	C8	-0.0439818	-0.179963	0.091999	0.526124	0	0.433877	0.698303	-0.0236647	-0.446213	0.398883	0.912594	0.966509
SL000027	COX-2	-0.0431921	-0.176833	0.0904486	0.526438	0	0.916127	0.698303	-0.0746772	-0.231586	0.0822316	0.350923	0.674991
SL005153	CNTFR alpha	0.0737195	-0.154412	0.301851	0.526503	0.640117	0.095527	0.698303	0.198631	-0.0106551	0.407917	0.0628602	0.265434
SL014288	MO2R1	0.043703	-0.0918311	0.179237	0.527393	0	0.932345	0.698708	0.0431014	-0.116318	0.202521	0.596179	0.827449
SL000570	Secretin	-0.0438501	-0.18101	0.0933102	0.530921	0	0.404272	0.702603	-0.0664015	-0.329629	0.196826	0.62101	0.840438
SL007266	PSD7	0.0582911	-0.124446	0.241028	0.531834	0.432004	0.184553	0.703033	0.056162	-0.105475	0.217799	0.495869	0.766577
SL004511	BPI	-0.0469254	-0.195396	0.101545	0.53561	0.15212	0.277476	0.7067	-0.115775	-0.375919	0.144369	0.383063	0.695685
SL004155	PDGF Rb	0.0527651	-0.114256	0.219786	0.535791	0.325544	0.223356	0.7067	0.0579832	-0.103031	0.218997	0.480306	0.760112
SL001726	GM-CSF	0.0724624	-0.158647	0.303572	0.538865	0.647683	0.0920383	0.709971	0.0970551	-0.17353	0.367641	0.482049	0.760112
SL002086	Ficolin-3	-0.0496833	-0.208458	0.109091	0.539674	0.253666	0.247055	0.710254	-0.144492	-0.476695	0.187711	0.393943	0.702913
SL003172	GCP-2	0.0424102	-0.093968	0.178788	0.542193	0	0.374821	0.712784	-0.0194865	-0.179668	0.140695	0.811544	0.928096
SL000299	b-ECGF	-0.0423213	-0.179433	0.0947902	0.545199	0	0.530541	0.715948	-0.0633846	-0.224982	0.0982133	0.44203	0.730324
SL004301	Ku70	-0.0419877	-0.178548	0.0945729	0.54676	0	0.530395	0.71721	-0.151146	-0.31172	0.00942821	0.0650545	0.269931
SL001753	Sialoadhesin	0.0416714	-0.0950027	0.178345	0.550117	0	0.427212	0.720822	-0.0338005	-0.194533	0.126932	0.680221	0.86876
SL000087	IL-6	0.0417528	-0.0954566	0.178962	0.550897	0	0.594507	0.721053	-0.0381396	-0.199656	0.123376	0.643496	0.856321
SL011400	PDE1A	-0.0411075	-0.17691	0.0946953	0.552993	0	0.982162	0.723005	-0.0106931	-0.170496	0.14911	0.895657	0.959059
SL004333	FGF-10	-0.0449995	-0.194262	0.104263	0.554596	0.152634	0.27733	0.724309	-0.0933617	-0.254988	0.0682648	0.257571	0.575202
SL006091	NCK1	-0.0407818	-0.176313	0.094749	0.555351	0	0.787435	0.724502	0.0151623	-0.144257	0.174582	0.852122	0.949893
SL004080	BMPR1A	-0.0407892	-0.177369	0.0957912	0.558322	0	0.323714	0.727585	0.0992925	-0.0610361	0.259621	0.224817	0.531993
SL014029	SPHK2	-0.0804508	-0.351136	0.190234	0.560213	0.743077	0.0485104	0.728689	-0.0863132	-0.444308	0.271682	0.636534	0.852118
SL005694	Peroxiredoxin-6	0.0588284	-0.139445	0.257101	0.560884	0.521636	0.148222	0.728689	0.087019	-0.216624	0.390662	0.574325	0.813868
SL001897	SPINT2	-0.0766015	-0.335196	0.181993	0.561519	0.718986	0.0592398	0.728689	0.0135661	-0.146619	0.173751	0.868165	0.95285
SL000426	Fibronectin	0.0798217	-0.190143	0.349786	0.562244	0.745673	0.0473769	0.728689	-0.0829484	-0.397646	0.231749	0.605428	0.829155
SL011709	PLPP	0.0659178	-0.157242	0.289078	0.562629	0.620528	0.104516	0.728689	0.0174144	-0.143714	0.178543	0.832241	0.940152
SL007358	KPCT	-0.0404458	-0.177442	0.0965504	0.562828	0	0.873323	0.728689	0.0166573	-0.144677	0.177991	0.839635	0.947212
SL004348	IFN-lambda 1	0.0529911	-0.129288	0.23527	0.568821	0.431594	0.184711	0.73565	-0.0128766	-0.174054	0.148301	0.875573	0.952923
SL004812	Triosephosphate isomerase	-0.0394518	-0.175955	0.0970517	0.57108	0	0.794596	0.736735	-0.0840776	-0.244701	0.0765455	0.304922	0.627534
SL003916	kallikrein 12	-0.0704858	-0.314412	0.173441	0.571151	0.68405	0.0752296	0.736735	-0.0368637	-0.58664	0.512912	0.895443	0.959059
SL005358	prostatic binding protein	0.0834361	-0.205576	0.372448	0.571509	0.775982	0.0346176	0.736735	0.0619987	-0.096958	0.220955	0.444596	0.730324
SL014188	CD244	0.0391125	-0.0977844	0.176009	0.575495	0	0.583773	0.741074	0.0964474	-0.0647314	0.257626	0.240869	0.555809
SL000038	MCP-1	0.0747306	-0.189401	0.338862	0.579215	0.73785	0.0508076	0.745061	0.0763608	-0.2839	0.436622	0.677825	0.86876
SL010496	CDK5/p35	-0.0421908	-0.191863	0.107481	0.580612	0.175233	0.270845	0.745483	-0.0134436	-0.473176	0.446289	0.954295	0.983089
SL000674	FST	-0.0384473	-0.174904	0.0980091	0.580791	0	0.431775	0.745483	-0.148091	-0.308289	0.0121061	0.0700093	0.283597
SL010973	PSA1	-0.0379395	-0.174201	0.0983218	0.585261	0	0.841137	0.750415	-0.0875847	-0.334548	0.159379	0.486996	0.762012
SL003700	BAD	-0.0378901	-0.174551	0.0987708	0.586846	0	0.517269	0.75133	-0.0813508	-0.242173	0.0794712	0.321473	0.644564
SL000633	Fas ligand, soluble	-0.0377642	-0.174162	0.0986334	0.587369	0	0.933874	0.75133	-0.014642	-0.175182	0.145898	0.858128	0.951276
SL006550	ECM1	0.0621958	-0.16274	0.287132	0.587861	0.633106	0.0987521	0.75133	-0.00237388	-0.384476	0.379729	0.990285	0.996612
SL000537	PDGF-BB	0.0649998	-0.171057	0.301057	0.589412	0.664102	0.0844507	0.751817	0.00844485	-0.323215	0.340105	0.960198	0.984079
SL000605	Ubiquitin+1	0.0639703	-0.168558	0.296499	0.589748	0.651611	0.0902252	0.751817	0.043569	-0.116285	0.203423	0.593203	0.825549
SL011629	AIP	-0.0693335	-0.321615	0.182948	0.590129	0.704618	0.0657744	0.751817	-0.0693108	-0.463585	0.324963	0.730434	0.894332
SL010512	PIK3CA/PIK3R1	0.0482839	-0.128101	0.224669	0.591597	0.399957	0.196722	0.752292	-0.00839772	-0.236881	0.220086	0.942573	0.978605
SL003650	Alpha enolase	0.0372676	-0.09926	0.173795	0.592645	0	0.575151	0.752292	-0.133265	-0.292944	0.0264149	0.101894	0.348354
SL007024	GREM1	0.0336177	-0.0895435	0.156779	0.59266	0	0.856055	0.752292	0.0410679	-0.102051	0.184187	0.573837	0.813868
SL007806	IL22RA1	-0.0385059	-0.179713	0.102701	0.59302	0.0563598	0.303278	0.752292	-0.108129	-0.299418	0.0831596	0.267904	0.589312
SL004334	FGF-16	-0.0597393	-0.279603	0.160125	0.59435	0.608914	0.109808	0.752402	-0.131408	-0.292349	0.0295321	0.109528	0.35567
SL003735	4-1BB ligand	0.0787898	-0.211199	0.368779	0.594366	0.774731	0.0351241	0.752402	0.200979	-0.364094	0.766052	0.485741	0.76176
SL001728	PDGFRA	0.0369836	-0.0997876	0.173755	0.596123	0.00628947	0.315784	0.753438	0.235284	0.0759795	0.394589	0.00379449	0.0431849
SL008059	RS3	-0.0531553	-0.249904	0.143594	0.596445	0.519635	0.149069	0.753438	-0.0529265	-0.226103	0.12025	0.549169	0.799339
SL005227	ULBP-1	-0.0368584	-0.173923	0.100206	0.598152	0	0.975692	0.754796	-0.0601136	-0.221641	0.101414	0.465748	0.748489
SL003761	pTEN	-0.0353089	-0.167997	0.0973791	0.60198	0	0.50369	0.758517	-0.104614	-0.260099	0.0508711	0.187266	0.489679
SL016828	EGFRvIII	0.0364746	-0.100742	0.173691	0.602371	0	0.930668	0.758517	-0.0446441	-0.206167	0.116879	0.588008	0.823763
SL014088	FCRL3	-0.0575561	-0.276128	0.161016	0.605775	0.609639	0.109479	0.76188	-0.125501	-0.284963	0.0339618	0.122943	0.385609
SL003848	Annexin V	0.0358939	-0.10062	0.172408	0.606316	0	0.815689	0.76188	0.185902	-0.0408848	0.412689	0.108137	0.355478
SL011772	PESC	-0.0335781	-0.162253	0.0950966	0.60903	0	0.331266	0.764486	-0.0498522	-0.200233	0.100529	0.51586	0.778901
SL004297	NEUREGULIN-1	0.0624819	-0.179033	0.303997	0.612114	0.674398	0.079689	0.766296	-0.00475782	-0.48489	0.475374	0.984504	0.995332
SL011068	IL-17 RC	0.0352791	-0.101404	0.171962	0.612938	0	0.541973	0.766296	0.0284094	-0.132308	0.189127	0.729001	0.89415
SL010505	MATK	-0.0646119	-0.314998	0.185774	0.613021	0.700908	0.067473	0.766296	-0.0911195	-0.322465	0.140226	0.440134	0.730324
SL010495	CDK2/cyclin A	0.0354057	-0.101806	0.172618	0.613037	0	0.318051	0.766296	0.072442	-0.0892421	0.234126	0.379859	0.692867
SL003332	MMP-17	0.0351425	-0.101707	0.171992	0.614744	0	0.334077	0.766949	-0.0276167	-0.18784	0.132607	0.735494	0.897117
SL010461	FCGR1	0.0342769	-0.0992388	0.167793	0.614843	0	0.534046	0.766949	-0.00718785	-0.163853	0.149477	0.928348	0.970582
SL014896	ANK2	-0.0340098	-0.168218	0.100198	0.619416	0	0.507232	0.771848	-0.0182162	-0.175928	0.139496	0.820905	0.934569
SL007153	PERL	-0.0341748	-0.169582	0.101233	0.620837	0	0.761048	0.772813	-0.0113109	-0.170671	0.14805	0.889362	0.956549
SL000130	Cyclin B1	-0.0426124	-0.212306	0.127081	0.622596	0.360257	0.211208	0.774196	-0.0404202	-0.269557	0.188716	0.729537	0.89415
SL000516	MCP-3	0.0333371	-0.102728	0.169403	0.631081	0	0.837254	0.782555	0.100292	-0.0597914	0.260376	0.219479	0.527359
SL003182	Integrin aVb5	0.0462274	-0.142818	0.235273	0.631745	0.469848	0.169626	0.782555	0.0535695	-0.268755	0.375894	0.74462	0.90167
SL009089	PGCB	0.0554968	-0.171484	0.282477	0.631788	0.63392	0.0983781	0.782555	0.0844943	-0.0761249	0.245114	0.302519	0.627534
SL016969	CSRP3	0.0756329	-0.234847	0.386113	0.633044	0.805075	0.0235134	0.782555	0.183615	0.0234817	0.343748	0.0246163	0.143495
SL004183	P-Cadherin	-0.0332324	-0.169732	0.103267	0.633236	0	0.836318	0.782555	0.060266	-0.27717	0.397702	0.726302	0.89374
SL003655	Transketolase	-0.0332385	-0.169767	0.10329	0.633247	0	0.562659	0.782555	-0.0751943	-0.235906	0.0855169	0.359123	0.680114
SL000460	IgD	0.0329968	-0.103257	0.169251	0.635038	0	0.550608	0.783666	0.049758	-0.110706	0.210222	0.543346	0.795709
SL003220	C3adesArg	-0.0329855	-0.169362	0.103391	0.635458	0	0.730842	0.783666	0.083037	-0.076868	0.242942	0.308778	0.627534
SL011508	PACAP-27	0.0322076	-0.101312	0.165727	0.636368	0	0.682647	0.783979	-0.0159227	-0.172586	0.140741	0.842103	0.947212
SL010520	AURKB	-0.0665706	-0.34402	0.210879	0.638163	0.754246	0.0436741	0.785381	-0.0521137	-0.631001	0.526774	0.859946	0.952396
SL003643	Glutathione S-transferase Pi	-0.0324169	-0.167931	0.103097	0.639175	0	0.394209	0.785817	0.148374	-0.0311942	0.327943	0.105343	0.351607
SL005797	PIGR	0.0321852	-0.10279	0.16716	0.640243	0	0.695398	0.786322	-0.156253	-0.313595	0.00108978	0.051608	0.235047
SL004639	TrkC	0.0681	-0.220537	0.356737	0.643776	0.775754	0.0347101	0.789848	0.437532	0.253068	0.621995	3.3377e-06	0.000265904
SL004345	GDF-11	0.0321851	-0.104779	0.169149	0.645107	0	0.535366	0.790659	-0.0547354	-0.215784	0.106313	0.505327	0.774809
SL007620	IL-12 RB2	-0.042445	-0.223601	0.138711	0.646075	0.424991	0.187252	0.790659	0.0934738	-0.202643	0.389591	0.536119	0.793232
SL014096	LRRT1	0.0316667	-0.103629	0.166963	0.646422	0	0.939109	0.790659	-0.0389705	-0.197967	0.120026	0.630948	0.847652
SL002655	CTGF	0.031855	-0.105188	0.168898	0.648689	0	0.846575	0.79262	0.00296993	-0.15843	0.16437	0.97123	0.988181
SL004771	Aurora kinase A	-0.0313152	-0.167583	0.104952	0.652413	0	0.756401	0.796358	-0.0451266	-0.207241	0.116988	0.585355	0.821009
SL008904	LYVE1	0.0724565	-0.244683	0.389596	0.654304	0.812491	0.0209245	0.797645	-0.02334	-0.305019	0.258339	0.870988	0.95285
SL004340	FGF-6	-0.0289414	-0.155813	0.0979298	0.654803	0	0.938417	0.797645	-0.0170233	-0.16492	0.130874	0.821516	0.934569
SL005308	PSME3	-0.0309837	-0.167297	0.105329	0.655961	0	0.820115	0.798242	-0.0450176	-0.205554	0.115519	0.582586	0.820956
SL004296	Myokinase, human	-0.0516954	-0.280157	0.176766	0.657409	0.64222	0.094558	0.798685	-0.001482	-0.308125	0.305161	0.992442	0.996612
SL007070	LDLR	-0.0314642	-0.170626	0.107698	0.657662	0.0312503	0.309629	0.798685	-0.115466	-0.29519	0.0642574	0.207955	0.515572
SL012783	WFKN1	0.0306582	-0.105614	0.16693	0.65925	0	0.524045	0.799801	0.0173312	-0.143152	0.177814	0.832369	0.940152
SL004685	Persephin	0.0632534	-0.219447	0.345953	0.660997	0.76378	0.0396372	0.800146	0.0258719	-0.287295	0.339039	0.871369	0.95285
SL011510	Somatostatin-28	0.0606291	-0.210537	0.331795	0.661226	0.743065	0.0485157	0.800146	0.134822	-0.0317127	0.301357	0.112573	0.361626
SL010502	MK08	0.030167	-0.104891	0.165225	0.661543	0	0.761252	0.800146	-0.0163183	-0.175087	0.142451	0.84035	0.947212
SL003104	Eotaxin-2	0.0421025	-0.147036	0.231241	0.662626	0.470344	0.169426	0.800645	0.0115072	-0.149984	0.172998	0.88893	0.956549
SL004067	GX	-0.0623502	-0.344063	0.219363	0.664442	0.761786	0.0404739	0.801584	0.0235783	-0.180493	0.22765	0.820849	0.934569
SL000556	PKC-G	0.030256	-0.10658	0.167092	0.664745	0	0.561463	0.801584	0.0399307	-0.141927	0.221788	0.66694	0.862915
SL000483	IL-7	-0.0835866	-0.463172	0.295999	0.666037	0.869234	0.00568592	0.802012	-0.0331004	-0.424976	0.358776	0.86851	0.95285
SL007280	CATC	0.0301068	-0.106792	0.167005	0.666442	0	0.962074	0.802012	0.0132957	-0.148016	0.174607	0.871664	0.95285
SL004838	CD47	0.0295676	-0.106054	0.165189	0.669159	0	0.769968	0.804472	0.0897778	-0.0698574	0.249413	0.270344	0.592385
SL004157	TRAIL R2	-0.0572915	-0.320715	0.206132	0.669912	0.733332	0.0528081	0.804567	-0.0752227	-0.31738	0.166934	0.542634	0.795709
SL005155	Cripto	-0.0295783	-0.166156	0.106999	0.671227	0	0.517483	0.805337	-0.0728655	-0.233698	0.0879671	0.37456	0.690398
SL005206	NKp44	0.0447791	-0.16279	0.252348	0.672423	0.563444	0.130155	0.80569	0.0213306	-0.266163	0.308824	0.88438	0.956549
SL003793	MEK1	-0.0322593	-0.18201	0.117492	0.672869	0.157944	0.27582	0.80569	-0.0162258	-0.177808	0.145356	0.843971	0.947212
SL006197	DnaJ homolog	0.0293859	-0.107638	0.16641	0.674245	0	0.636127	0.806529	-0.00292841	-0.164385	0.158528	0.971642	0.988181
SL004856	Desmoglein-1	-0.0646131	-0.367434	0.238208	0.675802	0.795717	0.026932	0.807583	-0.123334	-0.575668	0.329001	0.593063	0.825549
SL003461	ACTH	-0.0725018	-0.413567	0.268563	0.676943	0.841054	0.0121321	0.808138	-0.0882452	-0.42973	0.25324	0.612516	0.832715
SL000308	C1-Esterase Inhibitor	-0.0288576	-0.165703	0.107988	0.679378	0	0.636607	0.809968	0.175297	0.0161299	0.334464	0.0308824	0.170067
SL000668	CD36 ANTIGEN	-0.0385646	-0.221715	0.144586	0.679831	0.440791	0.181141	0.809968	-0.163618	-0.341485	0.0142487	0.0713955	0.285204
SL007237	MP2K4	0.0348606	-0.132159	0.20188	0.682476	0.332401	0.220994	0.812309	0.0896753	-0.21509	0.39444	0.564137	0.80892
SL000572	SAA	0.0282055	-0.107623	0.164034	0.684011	0	0.830442	0.81277	-0.0234832	-0.18321	0.136244	0.773227	0.91305
SL004515	PGRP-S	0.0282344	-0.10808	0.164549	0.684772	0	0.561409	0.81277	-0.0717231	-0.231968	0.088522	0.380352	0.692867
SL004131	B7-2	0.0277192	-0.106415	0.161853	0.685453	0	0.818397	0.81277	0.108008	-0.0493004	0.265317	0.178395	0.476918
SL000076	p27Kip1	0.0283187	-0.108776	0.165414	0.685584	0	0.828266	0.81277	0.0357936	-0.125792	0.197379	0.664172	0.862915
SL004861	IL-18 Rb	0.028061	-0.108201	0.164323	0.68649	0	0.991698	0.813038	-0.0184093	-0.178747	0.141928	0.821952	0.934569
SL003726	Chk2	0.0274295	-0.109598	0.164457	0.69481	0	0.433122	0.822078	0.0866821	-0.0747685	0.248133	0.292664	0.620094
SL004477	calgranulin B	-0.0271435	-0.163273	0.108986	0.695941	0	0.711268	0.822193	-0.0306027	-0.190959	0.129754	0.708373	0.879029
SL009202	JAML1	-0.0269743	-0.162416	0.108468	0.696284	0	0.884296	0.822193	-0.0659228	-0.225162	0.0933163	0.417137	0.720876
SL007356	NOTC2	-0.0269634	-0.164011	0.110084	0.699783	0	0.62876	0.82544	-0.122012	-0.283248	0.0392246	0.138033	0.411094
SL000526	MMP-8	-0.0265489	-0.162086	0.108988	0.701041	0	0.47446	0.82544	-0.0925667	-0.282007	0.0968739	0.338214	0.661482
SL004751	HO-2	0.0264465	-0.108599	0.161492	0.701106	0	0.620328	0.82544	0.0320172	-0.126907	0.190941	0.692946	0.873128
SL008158	H31	-0.0516445	-0.316638	0.213349	0.702479	0.732813	0.053039	0.825892	-0.0190156	-0.314425	0.276394	0.899602	0.961561
SL010616	SHP-2	-0.0353372	-0.216911	0.146236	0.702876	0.430097	0.185289	0.825892	-0.0627045	-0.222862	0.097453	0.442867	0.730324
SL014684	OAS1	-0.0264699	-0.162812	0.109872	0.703563	0	0.78159	0.825892	0.0036892	-0.156869	0.164247	0.96408	0.986366
SL004139	Ephrin-A3	0.0228953	-0.0954138	0.141204	0.704469	0	0.709252	0.826144	0.086919	-0.0496957	0.223534	0.212398	0.518666
SL008008	ARGI1	0.0262148	-0.1106	0.16303	0.707256	0	0.829511	0.828353	0.0344593	-0.126701	0.195619	0.675158	0.867757
SL014209	KLRF1	0.0260941	-0.110327	0.162515	0.707739	0	0.574965	0.828353	-0.0221013	-0.182634	0.138431	0.787285	0.916687
SL007056	BMP10	0.0257262	-0.109519	0.160972	0.709282	0	0.94239	0.828841	-0.0215978	-0.181278	0.138082	0.790934	0.917152
SL005179	IL-1F8	0.02597	-0.110939	0.162879	0.710055	0	0.76795	0.828841	0.0234126	-0.137813	0.184638	0.775936	0.913211
SL004145	HVEM	0.025687	-0.109819	0.161193	0.710237	0	0.552036	0.828841	0.0615494	-0.0978418	0.22094	0.449142	0.733449
SL002541	sRANKL	-0.0430928	-0.271991	0.185805	0.712137	0.638427	0.0963049	0.830106	0.0734583	-0.0876555	0.234572	0.371522	0.688323
SL004400	Coagulation Factor IXab	0.0460562	-0.199093	0.291205	0.71271	0.685589	0.0745195	0.830106	-0.127052	-0.371553	0.117448	0.308452	0.627534
SL010522	CDK8/cyclin C	-0.0250299	-0.160137	0.110077	0.716529	0	0.332214	0.833741	-0.0222904	-0.321566	0.276985	0.883937	0.956549
SL009951	WNT7A	-0.0267012	-0.171435	0.118033	0.717664	0.179345	0.269648	0.83425	-0.0317169	-0.184135	0.120701	0.683382	0.86876
SL002524	sCD4	0.0250892	-0.112198	0.162376	0.720207	0	0.561805	0.834915	-0.0597171	-0.221162	0.101728	0.468469	0.75043
SL000461	IgE	0.068198	-0.305134	0.44153	0.720317	0.86651	0.00620015	0.834915	0.0806754	-0.304829	0.466179	0.681684	0.86876
SL004724	MOZ	0.0250138	-0.111926	0.161953	0.720333	0	0.638591	0.834915	-0.020789	-0.262192	0.220614	0.865964	0.95285
SL004149	IL-13 Ra1	0.0248055	-0.111965	0.161576	0.722238	0	0.566775	0.835636	0.0347445	-0.126268	0.195757	0.672342	0.865785
SL012707	PCSK9	-0.0247069	-0.161394	0.11198	0.723134	0	0.482518	0.835636	-0.0656289	-0.22656	0.0953023	0.424124	0.721977
SL000493	LDH-H 1	0.0245937	-0.11158	0.160768	0.723354	0	0.914181	0.835636	0.0598506	-0.107924	0.227625	0.484439	0.761321
SL003849	FGF9	-0.0246417	-0.161663	0.112379	0.72448	0	0.621648	0.835636	0.026537	-0.134855	0.187929	0.747249	0.90167
SL009629	MBD4	0.0368439	-0.168118	0.241806	0.724597	0.550058	0.136012	0.835636	0.0567119	-0.104112	0.217536	0.489473	0.762012
SL004349	IFN-lambda 2	0.0246219	-0.112637	0.161881	0.72515	0	0.700477	0.835636	-0.00827507	-0.170036	0.153486	0.920135	0.967072
SL000088	TGF-b2	0.0225692	-0.104088	0.149226	0.726902	0	0.746174	0.835856	0.00743715	-0.140288	0.155163	0.921398	0.967549
SL004670	Artemin	-0.0476694	-0.315655	0.220316	0.72736	0.73681	0.0512667	0.835856	-0.0517107	-0.331012	0.227591	0.7167	0.885684
SL014069	PCSK7	0.0410788	-0.189926	0.272084	0.727439	0.650067	0.0909378	0.835856	-0.107859	-0.348688	0.13297	0.380053	0.692867
SL003862	CD40 ligand, soluble	-0.0241477	-0.160735	0.11244	0.728961	0	0.748311	0.8368	0.014879	-0.145791	0.175549	0.855972	0.950638
SL004331	CNTF	-0.0237166	-0.158451	0.111018	0.730093	0	0.901825	0.837295	-0.0470721	-0.20541	0.111265	0.560111	0.80892
SL011628	DBNL	-0.0396911	-0.266424	0.187042	0.73152	0.633453	0.0985927	0.838127	0.0649501	-0.298389	0.428289	0.726068	0.89374
SL006610	ATS13	-0.0238144	-0.160512	0.112883	0.732764	0	0.398869	0.838748	-0.0673906	-0.228345	0.0935638	0.41186	0.718371
SL014229	CD83	0.0973252	-0.46341	0.658061	0.733717	0.941009	3.8342e-05	0.839035	0.143115	-0.465858	0.752089	0.645077	0.856519
SL000670	GSTA3	0.0495297	-0.238495	0.337554	0.736085	0.77699	0.0342115	0.840939	0.0689676	-0.283317	0.421252	0.701195	0.873128
SL008967	SHPS1	0.0232561	-0.112493	0.159005	0.737042	0	0.361072	0.841227	0.0306912	-0.129085	0.190468	0.706555	0.878079
SL000338	Calpastatin	-0.0231968	-0.159474	0.11308	0.738665	0	0.377752	0.842276	0.0631275	-0.140852	0.267107	0.544137	0.795892
SL005430	SECTM1	0.0229992	-0.113374	0.159372	0.740986	0	0.837256	0.844117	-0.0473402	-0.207566	0.112885	0.562529	0.80892
SL012698	KI2L4	0.0219305	-0.108628	0.152489	0.741987	0	0.566065	0.844146	-0.0509876	-0.203633	0.101657	0.512673	0.777467
SL003704	BID	-0.022608	-0.158089	0.112873	0.74362	0	0.531449	0.844146	-0.0311992	-0.311295	0.248897	0.827183	0.936951
SL000566	RBP	0.0373347	-0.186411	0.26108	0.743635	0.623894	0.102977	0.844146	-0.0593813	-0.318018	0.199255	0.652714	0.860188
SL010250	Stress-induced-phosphoprotein 1	-0.0228151	-0.159658	0.114027	0.743838	0	0.435843	0.844146	0.0104014	-0.277548	0.298351	0.943558	0.978778
SL006915	IL-27	0.0281456	-0.141865	0.198156	0.745578	0.345482	0.216436	0.845318	0.00959783	-0.151855	0.171051	0.907246	0.965315
SL014091	SORC2	0.0243932	-0.123402	0.172189	0.746327	0.13879	0.281226	0.845366	-0.0425066	-0.254387	0.169374	0.694172	0.873128
SL004782	TSG-6	-0.0280422	-0.199047	0.142963	0.747904	0.361417	0.210794	0.846286	0.19334	0.0349353	0.351744	0.0167466	0.110564
SL008157	UB2L3	-0.022388	-0.159344	0.114568	0.748671	0	0.462776	0.846286	-0.0223606	-0.183601	0.13888	0.785772	0.916687
SL004489	TLR4	-0.0250027	-0.178328	0.128323	0.749264	0.205527	0.261898	0.846286	-0.00113771	-0.16166	0.159384	0.988917	0.996612
SL005204	NKG2D	0.0222206	-0.11497	0.159411	0.7509	0	0.407865	0.847333	-0.0114433	-0.173153	0.150267	0.889691	0.956549
SL000448	HSP 27	-0.0219022	-0.158391	0.114587	0.753132	0	0.431604	0.84905	0.0709415	-0.0895805	0.231463	0.386385	0.699591
SL004346	IL-20	0.0213023	-0.112848	0.155453	0.755624	0	0.435604	0.850986	-0.00404897	-0.16171	0.153613	0.959856	0.984079
SL005846	Moesin	-0.0278182	-0.203484	0.147847	0.756273	0.392049	0.199659	0.850986	-0.0256009	-0.231853	0.180651	0.807789	0.928096
SL011616	IF4A3	-0.0586497	-0.431308	0.314009	0.75773	0.867376	0.00603411	0.851823	-0.0225066	-0.439778	0.394764	0.915808	0.967072
SL011100	CD226	-0.0463988	-0.344009	0.251211	0.759934	0.786697	0.0303708	0.853497	-0.0521992	-0.304768	0.200369	0.685424	0.86876
SL008703	CBPE	-0.0210683	-0.158241	0.116104	0.763391	0	0.780904	0.856058	0.0462542	-0.115333	0.207841	0.574772	0.813868
SL010612	Dkk-4	-0.0220499	-0.165959	0.121859	0.763943	0.0979951	0.292377	0.856058	0.0460408	-0.186611	0.278692	0.698113	0.873128
SL007022	HNRPQ	0.0207708	-0.115098	0.156639	0.764461	0	0.963343	0.856058	0.00832296	-0.247521	0.264166	0.949161	0.982007
SL000001	MUC1	0.0208818	-0.116083	0.157847	0.765079	0	0.783278	0.856058	0.00516763	-0.156218	0.166553	0.949958	0.982007
SL007281	MK12	0.0377846	-0.211221	0.286791	0.766155	0.705339	0.0654447	0.856458	0.0318089	-0.206458	0.270076	0.793586	0.917152
SL006919	RSK-like protein kinase	0.0205543	-0.11611	0.157219	0.768163	0	0.794812	0.856458	0.0399851	-0.143184	0.223154	0.668759	0.862915
SL000006	PAI-1	0.0448363	-0.254234	0.343906	0.768883	0.793096	0.0279173	0.856458	-0.0283718	-0.191752	0.135009	0.733588	0.897117
SL004356	LAG-1	0.0208299	-0.118569	0.160229	0.769621	0.0460836	0.305897	0.856458	0.0705387	-0.0896431	0.230721	0.388081	0.701599
SL013548	IL-34	0.0202118	-0.115075	0.155499	0.769662	0	0.707065	0.856458	0.054361	-0.207003	0.315726	0.683529	0.86876
SL004692	CLF-1/CLC Complex	0.0204399	-0.116762	0.157642	0.770294	0	0.650842	0.856458	3.97812e-05	-0.161357	0.161436	0.999615	0.999615
SL000437	Haptoglobin, Mixed Type	0.0202827	-0.115961	0.156526	0.770454	0	0.420867	0.856458	0.0510418	-0.109378	0.211462	0.532882	0.792495
SL000305	b-NGF	0.0201597	-0.116251	0.156571	0.772079	0	0.516947	0.857467	-0.00444375	-0.165065	0.156178	0.956756	0.983178
SL004078	BMP-7	-0.0412604	-0.321386	0.238865	0.77282	0.761589	0.0405568	0.857484	0.0409356	-0.26378	0.345651	0.792317	0.917152
SL000158	PSMA	-0.0198922	-0.155379	0.115595	0.773529	0	0.701838	0.857484	-0.129706	-0.288704	0.0292932	0.10985	0.355746
SL000523	MMP-13	0.0439915	-0.25997	0.347953	0.776671	0.814263	0.0203228	0.860168	0.0940055	-0.371222	0.559233	0.692078	0.873128
SL004367	DKK1	-0.0194937	-0.155862	0.116874	0.779343	0	0.530099	0.862329	0.00255844	-0.180666	0.185783	0.978166	0.990601
SL000357	Coagulation Factor IX	0.0363498	-0.219161	0.291861	0.780375	0.710738	0.0629818	0.862672	-0.125051	-0.387142	0.13704	0.34971	0.674052
SL000322	C6	0.0437672	-0.266299	0.353834	0.782043	0.809415	0.0219846	0.862841	0.0233999	-0.419662	0.466462	0.917555	0.967072
SL002783	Cardiotrophin-1	0.0193092	-0.117892	0.156511	0.782673	0	0.589951	0.862841	0.0359663	-0.125789	0.197721	0.662983	0.862915
SL000131	PCNA	-0.030078	-0.243819	0.183663	0.782694	0.584524	0.120803	0.862841	-0.0566123	-0.227534	0.11431	0.516226	0.778901
SL007284	CRIS3	0.0242934	-0.149429	0.198016	0.784022	0.398251	0.197357	0.863508	-0.0640186	-0.220886	0.0928485	0.423783	0.721977
SL000542	gpIIbIIIa	-0.049048	-0.40122	0.303124	0.784877	0.84859	0.0101716	0.863653	0.0314026	-0.243861	0.306666	0.823071	0.934786
SL005159	EPO-R	0.0188017	-0.118407	0.15601	0.788257	0	0.965231	0.866575	-0.0160704	-0.177735	0.145594	0.845525	0.947212
SL004536	LEAP-1	0.0397421	-0.257291	0.336776	0.793139	0.785512	0.0308326	0.870325	0.160814	-0.106623	0.428251	0.238575	0.555809
SL010619	TPSG1	-0.0168606	-0.142974	0.109253	0.793294	0	0.975904	0.870325	-0.0144041	-0.161419	0.132611	0.847717	0.947212
SL000003	Angiogenin	0.0307738	-0.200932	0.26248	0.794624	0.651833	0.0901223	0.870325	-0.0638605	-0.517508	0.389787	0.78262	0.916687
SL005221	SREC-I	0.0564102	-0.369087	0.481908	0.794986	0.897335	0.0018026	0.870325	0.161858	-0.212254	0.53597	0.396455	0.702913
SL013754	RASA1	-0.0280926	-0.240335	0.18415	0.79531	0.580641	0.122537	0.870325	0.0735907	-0.0867758	0.233957	0.368435	0.688208
SL004350	IL-17B	-0.019662	-0.168799	0.129475	0.796098	0.169657	0.27246	0.870381	-0.0208959	-0.180486	0.138694	0.797467	0.920747
SL000507	Lymphotoxin a1/b2	-0.046429	-0.399867	0.307009	0.796817	0.849534	0.00993781	0.870381	-0.16746	-0.51088	0.17596	0.33921	0.662346
SL007217	INGR2	-0.0178219	-0.1548	0.119156	0.798717	0	0.741183	0.871659	-0.135062	-0.295704	0.0255814	0.0993831	0.34424
SL001999	MDM2	0.0321241	-0.218258	0.282506	0.801455	0.696634	0.0694341	0.873849	-0.0579451	-0.219529	0.103639	0.482146	0.760112
SL002542	K-ras	0.0168618	-0.115847	0.149571	0.803338	0	0.857042	0.875104	-0.0362574	-0.191714	0.119199	0.647581	0.857277
SL000136	AREG	-0.0292142	-0.261572	0.203144	0.805353	0.651053	0.0904828	0.8765	-0.0795132	-0.302603	0.143577	0.484824	0.761321
SL005685	EF-1-beta	-0.0165845	-0.153209	0.12004	0.811947	0	0.86176	0.882872	0.028573	-0.13227	0.189416	0.727706	0.89374
SL000339	carbonic anhydrase II	-0.0164613	-0.152787	0.119865	0.812917	0	0.610865	0.883123	0.0499967	-0.110399	0.210393	0.541242	0.795709
SL000470	IL-11	0.0161356	-0.120095	0.152366	0.816426	0	0.412142	0.88613	-0.06469	-0.225002	0.0956219	0.429005	0.724669
SL004625	ADAMTS-4	0.0347399	-0.262261	0.331741	0.818671	0.785858	0.0306974	0.88776	0.0643498	-0.202623	0.331323	0.636627	0.852118
SL003310	VEGF121	0.0158119	-0.120604	0.152228	0.820285	0	0.505458	0.888704	-0.000305015	-0.160973	0.160363	0.997031	0.99854
SL004070	Ubiquitin	-0.0156193	-0.152136	0.120897	0.822566	0	0.5096	0.890368	0.036171	-0.124554	0.196896	0.65915	0.862915
SL000070	Glypican 3	-0.0236285	-0.2316	0.184343	0.823785	0.562899	0.130395	0.89088	0.0631301	-0.133012	0.259272	0.52815	0.790201
SL010471	Testican-2	-0.01538	-0.151938	0.121178	0.825293	0	0.452081	0.891704	0.00118992	-0.176626	0.179005	0.989535	0.996612
SL011202	SNAA	-0.0187076	-0.18565	0.148234	0.826155	0.326718	0.222953	0.89183	0.0199132	-0.235772	0.275599	0.878678	0.955432
SL017611	14-3-3	-0.0149183	-0.151235	0.121399	0.830161	0	0.462198	0.895345	-0.0608461	-0.33969	0.217998	0.668884	0.862915
SL008190	SPTA2	-0.0147175	-0.15134	0.121905	0.832782	0	0.65496	0.897362	-0.0366698	-0.197538	0.124198	0.655039	0.860188
SL000268	Angiostatin	-0.0143217	-0.150326	0.121683	0.836487	0	0.677181	0.900542	-0.103314	-0.424973	0.218346	0.529008	0.790201
SL001795	IL-1b	0.0142518	-0.121805	0.150309	0.837335	0	0.812468	0.900644	-0.0276266	-0.187746	0.132493	0.735237	0.897117
SL007003	DHH	0.0142241	-0.122714	0.151162	0.838677	0	0.936275	0.901276	0.0140868	-0.147268	0.175442	0.864137	0.95285
SL011770	LCMT1	0.0139706	-0.122719	0.15066	0.841228	0	0.788333	0.902428	0.0310239	-0.166829	0.228877	0.758594	0.90573
SL003176	I-309	-0.0209794	-0.227598	0.18564	0.842256	0.559885	0.131719	0.902428	-0.101278	-0.487788	0.285233	0.607552	0.829743
SL000509	Lymphotoxin b R	-0.0378008	-0.411249	0.335647	0.84274	0.865297	0.00643685	0.902428	-0.0371966	-0.628464	0.554071	0.901869	0.961829
SL003918	kallikrein 13	0.0138334	-0.123043	0.15071	0.84298	0	0.838057	0.902428	0.0576549	-0.10354	0.21885	0.483289	0.760909
SL011769	AN32B	0.0137666	-0.122929	0.150462	0.843525	0	0.790098	0.902428	0.0428246	-0.118006	0.203656	0.601753	0.829155
SL005189	IL-7 Ra	-0.0136925	-0.150463	0.123078	0.84444	0	0.329995	0.902599	-0.0465647	-0.207639	0.11451	0.570985	0.813868
SL004901	Protein disulfide-isomerase	0.0152414	-0.138908	0.169391	0.84634	0.215805	0.258795	0.902981	0.0609294	-0.108135	0.229994	0.479967	0.760112
SL004068	Granzyme B	-0.0135206	-0.150829	0.123788	0.846963	0	0.757353	0.902981	-0.131164	-0.292199	0.0298713	0.110399	0.35656
SL004486	VEGF-C	-0.0213581	-0.239422	0.196706	0.847768	0.601244	0.113284	0.902981	-0.0022393	-0.339664	0.335186	0.989622	0.996612
SL018891	DSCAM	0.0164251	-0.15215	0.185	0.848549	0.33649	0.219577	0.902981	-0.0427678	-0.203908	0.118372	0.602931	0.829155
SL003307	IL-2 sRg	-0.019151	-0.215736	0.177434	0.848576	0.517538	0.149956	0.902981	-0.121446	-0.2808	0.0379076	0.135249	0.408136
SL000415	Factor H	0.0244071	-0.23451	0.283325	0.853419	0.718276	0.0595607	0.907327	-0.0533414	-0.212852	0.106169	0.512193	0.777467
SL013489	AMNLS	-0.0127755	-0.149757	0.124207	0.85496	0	0.597392	0.908157	-0.00774497	-0.169121	0.153631	0.925058	0.96855
SL008522	SEM5A	0.0150238	-0.147544	0.177591	0.856264	0.293214	0.234252	0.908735	-0.0786982	-0.238759	0.0813631	0.335213	0.658849
SL000485	IL-9	-0.012166	-0.147629	0.123297	0.860273	0	0.788123	0.91218	0.0355037	-0.123628	0.194636	0.661905	0.862915
SL014093	ENTP3	0.0118224	-0.125151	0.148796	0.865664	0	0.878497	0.91693	-0.00262372	-0.164044	0.158797	0.974586	0.98865
SL008331	PA2G4	-0.0256525	-0.324258	0.272953	0.866288	0.790528	0.0288944	0.91693	-0.0839194	-0.467131	0.299292	0.667769	0.862915
SL004119	discoidin domain receptor 1	0.0302692	-0.327838	0.388376	0.868419	0.853092	0.00908032	0.918372	0.0574189	-0.313512	0.42835	0.761588	0.90726
SL004366	TWEAKR	-0.0184244	-0.237758	0.200909	0.869227	0.60869	0.10991	0.918414	-0.020754	-0.233422	0.191914	0.848314	0.947212
SL011768	NUDC3	-0.011341	-0.147917	0.125235	0.870714	0	0.590813	0.919172	0.0205113	-0.140218	0.181241	0.802496	0.923875
SL014208	CRTAM	-0.0159866	-0.215402	0.183429	0.875146	0.52285	0.147707	0.922404	-0.0425798	-0.203865	0.118706	0.604852	0.829155
SL016557	HMGR	0.0288631	-0.332471	0.390197	0.875591	0.859533	0.00762669	0.922404	0.0194789	-0.358117	0.397075	0.919465	0.967072
SL003192	Properdin	-0.0234947	-0.318817	0.271828	0.876091	0.789665	0.0292248	0.922404	0.0345089	-0.21772	0.286738	0.788581	0.916687
SL000138	HB-EGF	-0.0253709	-0.34848	0.297738	0.87769	0.818022	0.0190691	0.922959	-0.0379142	-0.419132	0.343303	0.845448	0.947212
SL003863	kallikrein 5	-0.024531	-0.338167	0.289105	0.878163	0.808318	0.0223675	0.922959	0.0424699	-0.232677	0.317617	0.76225	0.90726
SL010463	GPC2	0.009629	-0.118338	0.137596	0.882754	0	0.972994	0.926969	0.0459158	-0.10349	0.195322	0.546947	0.798048
SL007049	CYTF	0.0099136	-0.126729	0.146556	0.886923	0	0.823242	0.93053	-0.0607434	-0.221235	0.0997486	0.458201	0.741318
SL005161	FGF-12	0.00978558	-0.127502	0.147074	0.888895	0	0.782426	0.931781	0.0185904	-0.143199	0.180379	0.821816	0.934569
SL003043	TIMP-3	-0.0186719	-0.290819	0.253475	0.893029	0.746301	0.0471037	0.935293	-0.0198119	-0.190886	0.151262	0.820438	0.934569
SL003672	SOD3	0.0092194	-0.127021	0.145459	0.894485	0	0.468601	0.935998	0.0806066	-0.0796696	0.240883	0.324275	0.645848
SL014294	EPHAA	0.0149504	-0.212388	0.242289	0.897443	0.639655	0.0957395	0.938272	0.110661	-0.0651742	0.286496	0.217391	0.524813
SL007531	BMPER	-0.0119162	-0.197793	0.173961	0.90001	0.450969	0.177148	0.940133	0.00967092	-0.152007	0.171349	0.906672	0.965315
SL014111	KIRR3	0.00863319	-0.128449	0.145715	0.901762	0	0.650611	0.941141	0.0649239	-0.0962778	0.226126	0.429893	0.724669
SL006698	transcription factor MLR1, isoform CRA_b	-0.0181595	-0.316613	0.280294	0.905074	0.790469	0.0289166	0.943772	0.0146697	-0.166897	0.196237	0.874177	0.95285
SL005725	GRB2-related adapter protein 2	-0.0117253	-0.213832	0.190382	0.909469	0.535103	0.142476	0.947329	-0.000812217	-0.355257	0.353633	0.996416	0.99854
SL006920	MAPK14	-0.01311	-0.241924	0.215704	0.910588	0.642457	0.0944485	0.947329	-0.0897793	-0.501888	0.32233	0.66939	0.862915
SL000319	C5	-0.0120169	-0.222402	0.198369	0.910863	0.575897	0.124648	0.947329	-0.0065213	-0.194558	0.181515	0.945807	0.980167
SL014108	LRRT3	-0.0074641	-0.142738	0.12781	0.913879	0	0.607602	0.94964	-0.0264235	-0.18552	0.132673	0.744787	0.90167
SL000658	GAS1	0.00717423	-0.129915	0.144263	0.918304	0	0.333574	0.953409	0.0328637	-0.128718	0.194445	0.690164	0.873128
SL000007	ER	0.00706096	-0.129706	0.143828	0.919401	0	0.441067	0.953719	-0.0443534	-0.315573	0.226866	0.748575	0.90167
SL010524	WNK3	0.00837182	-0.156194	0.172938	0.920576	0.306613	0.229784	0.95411	-0.045119	-0.287615	0.197377	0.715355	0.884938
SL013928	PPIE	0.00658321	-0.128072	0.141238	0.923662	0	0.927404	0.956479	-0.0121598	-0.170409	0.14609	0.880289	0.956314
SL008023	HPLN1	0.021252	-0.418874	0.461378	0.924602	0.903938	0.00125338	0.956622	0.0164623	-0.35129	0.384214	0.930086	0.971549
SL000481	IL-5	0.00631828	-0.130991	0.143628	0.928138	0	0.513133	0.959451	-0.0465749	-0.208324	0.115174	0.572506	0.813868
SL003170	Eotaxin-3	0.00799156	-0.167992	0.183975	0.929079	0.392416	0.199523	0.959593	0.0129411	-0.147917	0.173799	0.874709	0.95285
SL006918	MK01	0.00572591	-0.131192	0.142644	0.934674	0	0.559043	0.962819	0.00711594	-0.179996	0.194228	0.940582	0.978238
SL010610	CLC4K	0.00568945	-0.131618	0.142997	0.935273	0	0.856022	0.962819	0.0765962	-0.0850692	0.238262	0.353086	0.676182
SL001761	Troponin I	0.00566095	-0.131058	0.14238	0.93532	0	0.373252	0.962819	0.000287296	-0.195407	0.195982	0.997704	0.99854
SL004351	IL-17E	0.00933294	-0.216439	0.235105	0.935425	0.628902	0.100682	0.962819	-0.0148255	-0.301071	0.27142	0.919144	0.967072
SL004332	EG-VEGF	0.0108217	-0.275435	0.297079	0.940935	0.768066	0.0378538	0.967657	0.0208727	-0.309684	0.351429	0.901505	0.961829
SL000557	PKC-Z	0.00479828	-0.13243	0.142026	0.945362	0	0.576945	0.970673	-0.0462624	-0.207961	0.115436	0.574967	0.813868
SL000316	C4	0.00735341	-0.203451	0.218158	0.945492	0.58168	0.122073	0.970673	0.0648011	-0.216203	0.345806	0.651285	0.859984
SL010529	UFC1	0.00710849	-0.204149	0.218366	0.947418	0.585126	0.120534	0.971029	0.153758	-0.00462859	0.312145	0.0570814	0.251706
SL006189	KIF23	0.0045843	-0.131778	0.140947	0.947465	0	0.577701	0.971029	-0.0130181	-0.173636	0.1476	0.873782	0.95285
SL000517	MCP-4	-0.00417651	-0.13598	0.127627	0.950478	0	0.556554	0.972759	-0.0110737	-0.202184	0.180037	0.90958	0.965318
SL004642	ADAM 9	-0.00432094	-0.14152	0.132878	0.95078	0	0.717616	0.972759	0.0316569	-0.129886	0.1932	0.700915	0.873128
SL000358	Coagulation Factor VII	0.00868059	-0.290134	0.307495	0.954595	0.791617	0.0284788	0.975222	-0.0491788	-0.486368	0.38801	0.825502	0.935935
SL003334	EMAP-2	0.00873107	-0.297665	0.315127	0.95546	0.800222	0.0252659	0.975222	0.0644787	-0.0980075	0.226965	0.436708	0.730324
SL007327	OLR1	-0.00386447	-0.140072	0.132343	0.955654	0	0.622254	0.975222	-0.0831749	-0.390146	0.223796	0.595378	0.827298
SL004891	hnRNP A2/B1	0.00380164	-0.132648	0.140252	0.956452	0	0.614151	0.975222	-0.110041	-0.34498	0.124898	0.358613	0.680114
SL002565	c-Myc	0.00710982	-0.260893	0.275113	0.958532	0.737157	0.0511134	0.975803	0.0593241	-0.170084	0.288733	0.612268	0.832715
SL007953	PDXK	0.00426993	-0.157161	0.165701	0.958655	0.280354	0.238477	0.975803	-0.0572845	-0.220547	0.105978	0.491641	0.762012
SL002561	PTHrP	0.00468037	-0.184581	0.193942	0.961342	0.493153	0.160132	0.977706	0.0146466	-0.141951	0.171244	0.854551	0.950638
SL010373	FCAR	0.00293393	-0.130625	0.136493	0.965658	0	0.384132	0.98108	0.00255752	-0.154301	0.159416	0.974507	0.98865
SL005250	Chymase	-0.00399241	-0.193149	0.185164	0.967003	0.476513	0.166933	0.98108	-0.0224684	-0.250606	0.20567	0.846936	0.947212
SL000560	P-Selectin	0.00880056	-0.409686	0.427287	0.967123	0.893552	0.00217668	0.98108	0.140016	-0.135702	0.415735	0.319583	0.641851
SL004144	GFRa-3	-0.00273502	-0.138551	0.133081	0.968516	0	0.672281	0.98166	-0.00930466	-0.169364	0.150755	0.909287	0.965318
SL002517	TNF-a	-0.00362968	-0.19121	0.183951	0.969747	0.4691	0.169926	0.982075	0.0237772	-0.261212	0.308766	0.870106	0.95285
SL004342	FGF-8B	0.00689514	-0.380829	0.39462	0.972195	0.874404	0.0047768	0.98372	-0.0827514	-0.531103	0.3656	0.717541	0.885808
SL010451	CFC1	-0.00521095	-0.362498	0.352076	0.977195	0.854551	0.00873975	0.987943	0.0569325	-0.321944	0.435809	0.768362	0.910481
SL005236	NovH	0.00164227	-0.141935	0.145219	0.982114	0.0928019	0.293763	0.992076	-0.00168646	-0.162532	0.159159	0.983604	0.995264
SL004866	Carbonic anhydrase I	-0.0012869	-0.13781	0.135236	0.98526	0	0.363913	0.994099	0.0203924	-0.140409	0.181194	0.803703	0.924375
SL002756	hnRNP K	-0.00164168	-0.182171	0.178887	0.98578	0.440529	0.181243	0.994099	0.0245671	-0.198178	0.247312	0.828856	0.937957
SL004815	14-3-3 protein beta/alpha	-0.00114644	-0.137727	0.135434	0.986874	0	0.521596	0.994363	0.0126254	-0.162444	0.187694	0.887597	0.956549
SL007673	NET4	-0.00209344	-0.269342	0.265155	0.987751	0.748085	0.0463288	0.994408	-0.110573	-0.456407	0.23526	0.530882	0.791028
SL002640	PlGF	-0.00113045	-0.18026	0.177999	0.990131	0.409948	0.192974	0.994595	-0.012001	-0.173313	0.149311	0.884068	0.956549
SL001713	IL-17	0.00085269	-0.134801	0.136507	0.99017	0	0.889642	0.994595	0.0155154	-0.144122	0.175153	0.848924	0.947212
SL000616	Vitronectin	0.000834767	-0.135621	0.13729	0.990434	0	0.564425	0.994595	0.116435	-0.0433384	0.276209	0.153198	0.440075
SL008094	PGM1	-0.000539368	-0.135175	0.134097	0.993735	0	0.750986	0.996206	0.00752918	-0.150484	0.165543	0.925593	0.96855
SL000590	Thyroxine-Binding Globulin	0.000910661	-0.258195	0.260016	0.994504	0.71954	0.0589895	0.996206	-0.0636805	-0.272529	0.145168	0.550095	0.799713
SL003738	B7	-0.000586119	-0.184538	0.183366	0.995017	0.441484	0.18087	0.996206	-0.166914	-0.327238	-0.00658995	0.0412979	0.204728
SL000622	Coagulation Factor V	0.000399293	-0.134543	0.135341	0.995373	0	0.565692	0.996206	0.0732618	-0.0850452	0.231569	0.364387	0.684658
SL000584	TGF-b1	-0.00018374	-0.148735	0.148367	0.998066	0.15423	0.276877	0.998066	0.0208014	-0.218297	0.2599	0.864604	0.95285

## Sheet: MOD
MOD
Unadjusted model									Adjusted model
Variable	Name	Effect	Lower	Upper	P-value	I2	Heterogeneity	P-value (FDR)	Effect	Lower	Upper	P-value	P-value (FDR)
SL005231	UNC5H4	-0.801875	-0.939758	-0.663993	4.25745e-30	0	0.669233	2.67522e-27	-0.289469	-0.467389	-0.111549	0.00142868	0.0289369
SL001997	IL-1 sRI	-0.801948	-0.939896	-0.663999	4.47735e-30	0	0.642437	2.67522e-27	-0.329535	-0.56068	-0.0983901	0.005202	0.0601841
SL003764	NCAM-120	-0.774719	-0.912938	-0.6365	4.48165e-28	0	0.364593	1.78519e-25	-0.351944	-0.532153	-0.171736	0.000129308	0.00813279
SL004639	TrkC	-0.756701	-0.89542	-0.617982	1.11656e-26	0	0.966009	3.33572e-24	-0.299702	-0.479791	-0.119612	0.00110732	0.0265097
SL004747	ApoM	-0.690209	-0.830952	-0.549466	7.13203e-22	0.012278	0.314321	1.70456e-19	-0.103821	-0.319401	0.111758	0.34522	0.686418
SL009412	DKK3	-0.662061	-0.802586	-0.521535	2.60661e-20	0	0.926301	5.1915e-18	-0.42119	-0.606846	-0.235534	8.72851e-06	0.00208611
SL009400	CRDL1	-0.657178	-0.797708	-0.516647	4.92846e-20	0	0.784981	8.41359e-18	-0.496544	-0.696106	-0.296983	1.07856e-06	0.000644437
SL008382	CYTD	-0.632513	-0.773855	-0.491171	1.77157e-18	0	0.356065	2.64628e-16	-0.307863	-0.493678	-0.122048	0.00116501	0.0266337
SL008516	CYTT	-0.657408	-0.806815	-0.508	6.46362e-18	0.124143	0.285285	8.58225e-16	-0.204989	-0.535527	0.125548	0.224172	0.55026
SL012517	RSPO4	-0.618906	-0.760248	-0.477563	9.30647e-18	0	0.562893	1.11212e-15	-0.335704	-0.777383	0.105975	0.136304	0.416582
SL007151	GPDA	0.613453	0.471738	0.755167	2.17075e-17	0	0.713537	2.35822e-15	0.158135	-0.100499	0.416769	0.230774	0.557121
SL002704	PTN	-0.609013	-0.750397	-0.467628	3.10533e-17	0	0.73701	3.09239e-15	-0.465967	-0.901648	-0.0302872	0.0360631	0.18656
SL001947	MIA	-0.601654	-0.742883	-0.460425	6.84387e-17	0	0.929499	6.2911e-15	-0.276007	-0.461759	-0.0902549	0.0035879	0.0487221
SL010391	WFKN2	-0.587906	-0.729622	-0.446189	4.26337e-16	0	0.376817	3.63909e-14	-0.0640242	-0.261922	0.133873	0.526021	0.805745
SL008936	CHL1	-0.570399	-0.711776	-0.429023	2.62202e-15	0	0.98588	2.08888e-13	-0.159406	-0.344032	0.0252209	0.0906034	0.330262
SL005196	LSAMP	-0.564908	-0.707123	-0.422694	6.94688e-15	0	0.824772	5.18845e-13	-0.236056	-0.423072	-0.0490395	0.0133645	0.10095
SL007631	SOST	-0.551288	-0.693264	-0.409312	2.73094e-14	0	0.972525	1.91969e-12	-0.252496	-0.439378	-0.0656133	0.00809465	0.0767707
SL005168	Growth hormone receptor	0.713414	0.524253	0.902575	1.44716e-13	0.450589	0.177298	9.60753e-12	0.0692438	-0.174623	0.313111	0.57786	0.819684
SL001990	IL-1Ra	0.625619	0.456347	0.794891	4.35956e-13	0.347118	0.215862	2.74193e-11	0.229913	-0.166317	0.626143	0.255424	0.57933
SL005084	Periostin	-0.495708	-0.638443	-0.352972	9.98026e-12	0	0.558351	5.9632e-10	-0.436133	-0.678587	-0.193679	0.000422473	0.0168285
SL000051	CRP	0.493962	0.351226	0.636699	1.17887e-11	0	0.874153	6.70834e-10	-0.118071	-0.300349	0.0642063	0.204235	0.52827
SL000498	Leptin	0.891035	0.629345	1.15272	2.49703e-11	0.726838	0.0557058	1.35634e-09	-0.299725	-0.593346	-0.00610321	0.0454243	0.216302
SL000124	MMP-2	-0.478303	-0.62103	-0.335575	5.0943e-11	0	0.715817	2.64682e-09	-0.352742	-0.542168	-0.163315	0.000262496	0.0133544
SL005115	Spondin-1	-0.474185	-0.616807	-0.331563	7.20111e-11	0	0.830849	3.58555e-09	-0.406935	-0.596627	-0.217242	2.61565e-05	0.003473
SL000522	MMP-12	-0.467357	-0.610813	-0.323902	1.71095e-10	0	0.981551	8.17836e-09	-0.369591	-0.62873	-0.110451	0.0051845	0.0601841
SL008810	NEGR1	-0.46366	-0.60714	-0.320181	2.39357e-10	0	0.745234	1.10012e-08	-0.242814	-0.432448	-0.0531804	0.0120864	0.0946979
SL009054	NRX1B	-0.44405	-0.585201	-0.302899	7.00888e-10	0	0.446537	3.10208e-08	-0.265201	-0.452374	-0.0780281	0.00548585	0.0618452
SL012561	REG4	-0.449807	-0.593675	-0.305939	8.90602e-10	0	0.468272	3.80096e-08	-0.0949996	-0.28393	0.0939305	0.324365	0.663727
SL000414	Factor B	0.445953	0.302031	0.589874	1.25455e-09	0	0.370331	5.16961e-08	0.254882	0.06409	0.445674	0.00883568	0.0799897
SL003188	MIG	-0.43966	-0.582441	-0.296879	1.58735e-09	0	0.486259	6.32294e-08	-0.426066	-0.615684	-0.236448	1.06285e-05	0.00211685
SL004610	LRP8	-0.43655	-0.57998	-0.293119	2.44006e-09	0	0.845362	9.40605e-08	-0.30365	-0.494162	-0.113138	0.00178463	0.0338514
SL008574	OMD	-0.432394	-0.57523	-0.289558	2.97067e-09	0	0.871499	1.10936e-07	-0.395313	-0.585343	-0.205282	4.55755e-05	0.00418944
SL000406	Eotaxin	-0.434849	-0.578965	-0.290732	3.34135e-09	0	0.768483	1.20997e-07	-0.16413	-0.354419	0.0261583	0.0909257	0.330262
SL003304	IGF-I sR	-0.433126	-0.576815	-0.289437	3.46304e-09	0	0.967927	1.21716e-07	-0.19402	-0.384084	-0.00395699	0.0454173	0.216302
SL001888	SLPI	-0.424392	-0.566395	-0.282389	4.69682e-09	0	0.965819	1.60363e-07	-0.161799	-0.603781	0.280182	0.473067	0.777822
SL005169	sICAM-5	-0.427219	-0.570479	-0.283959	5.06976e-09	0	0.960846	1.68288e-07	-0.174693	-0.432628	0.0832417	0.184364	0.50033
SL004258	Adiponectin	-0.422819	-0.566236	-0.279402	7.54411e-09	0	0.471484	2.43654e-07	-0.20168	-0.569112	0.165752	0.282014	0.6161
SL010468	RGMB	-0.419982	-0.563354	-0.276609	9.3931e-09	0	0.937221	2.95388e-07	-0.280068	-0.470457	-0.0896795	0.00393692	0.0522108
SL006114	ROR1	-0.409481	-0.553013	-0.265949	2.25026e-08	0	0.928656	6.89504e-07	-0.242247	-0.432686	-0.0518073	0.0126614	0.0976152
SL000415	Factor H	0.408637	0.264429	0.552845	2.79411e-08	0	0.900759	8.3474e-07	0.153276	-0.0373304	0.343883	0.115002	0.379309
SL005102	SHBG	-0.471286	-0.642742	-0.299829	7.14905e-08	0.305441	0.230178	2.08369e-06	-0.115895	-0.310788	0.0789989	0.243815	0.570886
SL005156	DAN	-0.389613	-0.532954	-0.246272	9.96623e-08	0	0.494624	2.83563e-06	-0.410103	-0.600539	-0.219667	2.43462e-05	0.003473
SL004855	contactin-1	-0.38833	-0.531417	-0.245244	1.04198e-07	0	0.575858	2.84324e-06	-0.249648	-0.439671	-0.0596257	0.010025	0.0868108
SL004862	PD-L2	-0.390017	-0.53381	-0.246224	1.06007e-07	0	0.73071	2.84324e-06	-0.153297	-0.355632	0.0490381	0.137558	0.418275
SL003301	Ck-b-8-1	-0.389167	-0.532696	-0.245639	1.07068e-07	0	0.891123	2.84324e-06	-0.224772	-0.415129	-0.0344155	0.0206504	0.12988
SL001774	FABP	0.708289	0.44657	0.970008	1.13145e-07	0.71533	0.060895	2.93931e-06	-0.190115	-0.358325	-0.0219048	0.0267467	0.154407
SL004661	Aggrecan	-0.390643	-0.535135	-0.246151	1.16511e-07	0	0.756132	2.96234e-06	-0.352631	-0.544692	-0.16057	0.000319974	0.0141618
SL000424	Fibrinogen	-0.387064	-0.530793	-0.243336	1.3044e-07	0	0.753179	3.24741e-06	-0.28485	-0.64884	0.0791408	0.125074	0.39751
SL008631	DSC2	-0.386019	-0.530277	-0.241762	1.5656e-07	0	0.672448	3.81815e-06	-0.239176	-0.430505	-0.0478473	0.0142812	0.105346
SL003328	Factor I	0.383126	0.23935	0.526903	1.76247e-07	0	0.461644	4.2123e-06	0.0479501	-0.141113	0.237013	0.619129	0.846614
SL004733	sLRP1	-0.380761	-0.52517	-0.236352	2.36865e-07	0	0.865522	5.55007e-06	-0.214192	-0.405711	-0.0226723	0.0283805	0.15848
SL010465	MATN2	-0.369065	-0.511923	-0.226208	4.11706e-07	0	0.548309	9.29695e-06	-0.313217	-0.553786	-0.0726476	0.0107156	0.0889849
SL004672	BCMA	-0.39458	-0.547323	-0.241838	4.12333e-07	0.111857	0.288642	9.29695e-06	-0.345162	-0.628232	-0.0620915	0.0168538	0.117375
SL000308	C1-Esterase Inhibitor	-0.372096	-0.516705	-0.227488	4.57711e-07	0	0.332103	1.0129e-05	-0.0803738	-0.441121	0.280373	0.662346	0.866487
SL004438	Cystatin M	-0.370851	-0.515236	-0.226466	4.79982e-07	0	0.958253	1.04287e-05	-0.131234	-0.322128	0.0596607	0.177848	0.489787
SL004152	IL-18 Ra	0.368673	0.224744	0.512603	5.15584e-07	0	0.586317	1.10022e-05	0.00853426	-0.180399	0.197468	0.929453	0.975151
SL004097	SMAD3	0.367395	0.222993	0.511797	6.14365e-07	0	0.443422	1.28801e-05	0.319679	0.127586	0.511773	0.00110725	0.0265097
SL008414	EphB6	-0.36126	-0.505507	-0.217013	9.17051e-07	0	0.825425	1.88944e-05	-0.323976	-0.515788	-0.132164	0.000931503	0.0256498
SL000272	Antithrombin III	-0.358774	-0.503104	-0.214444	1.10438e-06	0	0.875736	2.23684e-05	0.161479	-0.0251468	0.348104	0.0899106	0.32958
SL004154	NCAM-L1	-0.350899	-0.494766	-0.207032	1.74907e-06	0	0.688579	3.48357e-05	-0.342644	-0.534085	-0.151202	0.000451558	0.0168614
SL007274	EFNB2	-0.348494	-0.492631	-0.204358	2.14977e-06	0	0.932472	4.21144e-05	-0.263847	-0.455469	-0.0722251	0.00696103	0.0717106
SL003302	MPIF-1	-0.348236	-0.49244	-0.204033	2.21118e-06	0	0.596145	4.26188e-05	-0.195573	-0.426887	0.0357411	0.0974945	0.345036
SL004466	Heparin cofactor II	0.346878	0.202727	0.491028	2.40088e-06	0	0.92801	4.55405e-05	0.239565	0.0479706	0.431159	0.0142582	0.105346
SL008360	FLRT2	-0.343199	-0.487205	-0.199193	2.99684e-06	0	0.571045	5.59566e-05	-0.27705	-0.468579	-0.085522	0.00458063	0.0564314
SL012538	ARMEL	-0.341305	-0.485133	-0.197478	3.30295e-06	0	0.521835	6.05094e-05	-0.194227	-0.460527	0.0720733	0.152859	0.449917
SL000062	PSA	-0.343169	-0.487857	-0.19848	3.34194e-06	0	0.486665	6.05094e-05	0.00286174	-0.187297	0.19302	0.976469	0.993936
SL011499	PH	-0.335184	-0.478523	-0.191844	4.5801e-06	0	0.934483	8.16898e-05	-0.245139	-0.487697	-0.00258155	0.047611	0.220524
SL002785	N-terminal pro-BNP	-0.335013	-0.478904	-0.191123	5.03581e-06	0	0.612967	8.8497e-05	-0.359891	-0.695746	-0.0240354	0.0357088	0.18553
SL004556	DAF	-0.335323	-0.479498	-0.191148	5.15201e-06	0	0.903759	8.92269e-05	-0.30509	-0.496877	-0.113304	0.00182158	0.0340123
SL005153	CNTFR alpha	-0.332086	-0.476385	-0.187788	6.46335e-06	0	0.844793	0.000110339	-0.195104	-0.386674	-0.00353426	0.0459205	0.217758
SL008639	IDS	-0.33201	-0.476429	-0.187591	6.61113e-06	0	0.762082	0.000110444	-0.128273	-0.319613	0.0630672	0.188865	0.501541
SL003168	CTACK	-0.3334	-0.478468	-0.188332	6.65434e-06	0	0.776904	0.000110444	-0.249705	-0.442578	-0.0568307	0.0111657	0.0917553
SL008773	CD109	-0.32943	-0.47348	-0.185379	7.38596e-06	0	0.449499	0.000120907	-0.393997	-0.585604	-0.20239	5.57227e-05	0.00443924
SL005703	Notch 1	-0.327599	-0.471679	-0.18352	8.33266e-06	0	0.924169	0.000134561	-0.17467	-0.36594	0.0165988	0.0734743	0.289775
SL010456	CYTN	-0.469738	-0.677139	-0.262337	9.03415e-06	0.521645	0.148218	0.000143944	-0.164864	-0.433243	0.103516	0.228592	0.554093
SL002654	Epithelial cell kinase	-0.378586	-0.545875	-0.211297	9.18489e-06	0.257024	0.24599	0.00014442	-0.356714	-0.548149	-0.165279	0.000260063	0.0133544
SL005059	TGF-b R III	-0.325516	-0.469853	-0.181179	9.85993e-06	0	0.567895	0.000153021	-0.237219	-0.434758	-0.0396797	0.0185895	0.126331
SL000320	C5a	0.37067	0.205355	0.535985	1.10952e-05	0.247383	0.249037	0.000169985	-0.103134	-0.289075	0.0828063	0.276984	0.609569
SL004516	MBL	-0.321767	-0.465904	-0.17763	1.21232e-05	0	0.419182	0.000183383	-0.082394	-0.272875	0.108087	0.396551	0.728711
SL007673	NET4	0.3109	0.169649	0.452151	1.60344e-05	0	0.850888	0.000239514	0.149929	-0.0681765	0.368035	0.177881	0.489787
SL011049	MASP3	0.316981	0.172361	0.461601	1.74e-05	0	0.552594	0.000256704	0.35788	0.124096	0.591665	0.00269675	0.0397853
SL018625	TLR4:MD-2 complex	0.312848	0.168146	0.457551	2.26052e-05	0	0.629804	0.000326015	0.159857	-0.0322192	0.351932	0.102849	0.355216
SL010378	RET	0.701881	0.377209	1.02655	2.26437e-05	0.818078	0.0190507	0.000326015	0.117877	-0.521013	0.756767	0.717637	0.897047
SL006378	Esterase D	0.330321	0.175799	0.484843	2.79203e-05	0.119705	0.286503	0.0003972	0.381245	0.188661	0.573829	0.000104454	0.00734249
SL004782	TSG-6	-0.307865	-0.45232	-0.163411	2.95217e-05	0	0.891968	0.000415041	-0.0824949	-0.273717	0.108728	0.397807	0.728711
SL004671	BAFF Receptor	0.307323	0.162419	0.452226	3.22677e-05	0	0.804056	0.000448371	0.444357	0.251913	0.636801	6.02249e-06	0.00208611
SL007311	SNP25	0.30349	0.158573	0.448406	4.04963e-05	0	0.32257	0.000550185	0.321283	0.128444	0.514123	0.00109295	0.0265097
SL004865	Cadherin-6	0.30241	0.157947	0.446872	4.08044e-05	0	0.764637	0.000550185	0.316839	0.124665	0.509013	0.00123183	0.0272599
SL010467	RGMA	-0.301377	-0.445381	-0.157374	4.09762e-05	0	0.37395	0.000550185	-0.109187	-0.300093	0.0817189	0.262295	0.589177
SL011888	SMOC1	-0.394261	-0.58324	-0.205283	4.33199e-05	0.416323	0.190561	0.000575192	-0.240437	-0.530811	0.0499365	0.10461	0.359551
SL003066	PEDF	0.355427	0.1831	0.527754	5.28953e-05	0.313848	0.227344	0.000694615	0.0280793	-0.159384	0.215543	0.769083	0.919375
SL004626	ADAMTS-5	-0.299374	-0.444664	-0.154085	5.37771e-05	0	0.525451	0.000698518	-0.355515	-0.548788	-0.162242	0.000311866	0.0141618
SL001777	Cystatin C	-0.29717	-0.441903	-0.152437	5.71554e-05	0	0.990949	0.000734416	-0.428422	-0.765695	-0.0911502	0.0127866	0.0979486
SL000426	Fibronectin	0.294765	0.150939	0.438591	5.89786e-05	0	0.813837	0.000749782	0.185591	-0.133341	0.504524	0.254065	0.578299
SL014070	SLIK5	-0.398008	-0.592663	-0.203353	6.13631e-05	0.451215	0.177051	0.00076803	-0.374154	-0.565336	-0.182972	0.000125175	0.00813279
SL000645	MMP-10	-0.310212	-0.462068	-0.158356	6.23253e-05	0.0956823	0.292995	0.00076803	-0.0751382	-0.266026	0.11575	0.440416	0.752929
SL018946	UB2G2	0.281624	0.14376	0.419487	6.23422e-05	0	0.968712	0.00076803	0.0633749	-0.118961	0.245711	0.495726	0.784315
SL008611	ASAHL	-0.295024	-0.439798	-0.15025	6.49524e-05	0	0.570689	0.000792021	-0.143294	-0.335476	0.0488874	0.14391	0.434272
SL005574	Aminoacylase-1	0.482077	0.245348	0.718806	6.57176e-05	0.633527	0.0985586	0.000793257	0.180672	-0.23046	0.591804	0.389069	0.720622
SL005210	Nr-CAM	-0.409071	-0.610112	-0.20803	6.66132e-05	0.497703	0.158252	0.000796028	-0.392447	-0.678455	-0.106439	0.00715861	0.072664
SL006542	FCN2	0.288943	0.144122	0.433764	9.21178e-05	0	0.801777	0.00108991	0.334822	0.142152	0.527492	0.00065915	0.0207285
SL007206	TSP2	0.283878	0.140124	0.427633	0.000108646	0	0.558118	0.00127286	-0.172475	-0.419076	0.0741258	0.170431	0.479213
SL005572	Gelsolin	-0.421138	-0.634768	-0.207508	0.000111657	0.5493	0.136342	0.00129544	-0.235711	-0.539724	0.0683021	0.128606	0.404858
SL017612	HSP 90a/b	0.29868	0.146317	0.451043	0.000121964	0.0935073	0.293575	0.00140141	0.00804741	-0.316556	0.332651	0.961246	0.985153
SL000528	NADPH-P450 Oxidoreductase	0.281828	0.137131	0.426525	0.000134844	0	0.567547	0.00153466	0.20062	-0.0507674	0.452007	0.117782	0.380714
SL004141	Ephrin-A5	-0.281865	-0.427749	-0.135982	0.000152541	0.0172444	0.313102	0.00170579	-0.336688	-0.529002	-0.144373	0.000600604	0.0203214
SL010489	CAMK1	0.280701	0.135408	0.425994	0.000152736	0	0.817077	0.00170579	0.299399	0.106055	0.492743	0.00240484	0.0385222
SL005172	IGFBP-6	-0.27907	-0.423693	-0.134447	0.000155563	0	0.633753	0.00172128	-0.327266	-0.519346	-0.135186	0.000839633	0.024273
SL010376	MMEL2	0.278462	0.133897	0.423027	0.000159815	0	0.407748	0.0017521	0.312188	0.0389573	0.585419	0.0251289	0.148658
SL010494	CDK1/cyclin B	0.279967	0.134409	0.425524	0.000163371	0	0.562171	0.0017748	0.167469	-0.164241	0.499179	0.322411	0.662328
SL000458	IFN-g R1	-0.276734	-0.420919	-0.132549	0.000168728	0	0.486779	0.00180272	-0.302469	-0.541458	-0.0634806	0.0131172	0.0998408
SL016566	DRAK2	0.277763	0.133029	0.422497	0.000168958	0	0.822842	0.00180272	0.335653	0.143221	0.528086	0.000629197	0.0203214
SL000337	Calpain I	-0.277998	-0.423058	-0.132939	0.000172542	0	0.416831	0.00182466	-0.297626	-0.490649	-0.104603	0.00251019	0.0385222
SL000428	FSH	-0.276894	-0.421497	-0.132291	0.000174692	0	0.398678	0.0018312	-0.344919	-0.537234	-0.152604	0.000439405	0.0168614
SL004337	FGF-19	-0.274054	-0.417613	-0.130496	0.000182864	0	0.318403	0.00188883	-0.0711188	-0.260846	0.118608	0.462529	0.770058
SL007033	LTBP4	-0.275128	-0.419275	-0.130981	0.00018335	0	0.885751	0.00188883	-0.241865	-0.433624	-0.0501072	0.0134318	0.10095
SL000617	ALT	0.276545	0.131186	0.421904	0.000192374	0	0.693087	0.00196484	0.164217	-0.0289684	0.357403	0.0957005	0.34343
SL010390	URB	-0.274898	-0.4197	-0.130097	0.000198519	0	0.987469	0.00201042	-0.500054	-0.735197	-0.26491	3.07228e-05	0.00367138
SL007804	BGN	-0.273018	-0.41747	-0.128567	0.000211894	0	0.904847	0.00212784	-0.369826	-0.561796	-0.177856	0.000159472	0.00952848
SL005357	PSP	-0.273237	-0.418048	-0.128426	0.000217166	0	0.771291	0.00215998	-0.0558249	-0.247585	0.135935	0.568283	0.819308
SL005699	Apo L1	0.27285	0.128174	0.417527	0.000218709	0	0.83173	0.00215998	0.301757	0.102749	0.500765	0.00295956	0.0426106
SL000427	Fractalkine/CX3CL-1	-0.272169	-0.41657	-0.127769	0.000220602	0	0.588571	0.00216082	-0.338783	-0.53084	-0.146726	0.000545581	0.0191756
SL017290	PolyUbiquitin K63	0.272355	0.127308	0.417401	0.000233014	0	0.860063	0.00226383	0.296622	0.103619	0.489624	0.00259338	0.0387386
SL006805	MRCKB	0.271185	0.126617	0.415753	0.000236401	0	0.351534	0.00227822	0.291018	0.0258355	0.556201	0.031483	0.168177
SL010530	OCAD1	0.270353	0.125757	0.41495	0.000247757	0	0.421285	0.00236856	0.276723	0.00880216	0.544643	0.0429335	0.212007
SL007752	DAPK2	0.269581	0.12479	0.414373	0.000263088	0	0.334541	0.00249516	0.227454	-0.0637651	0.518672	0.125816	0.398807
SL012395	NET1	-0.266802	-0.410622	-0.122982	0.000276966	0	0.997643	0.0026061	-0.341475	-0.53271	-0.150241	0.00046563	0.0168614
SL004636	Flt-3	0.265364	0.120665	0.410064	0.000325161	0	0.568165	0.00303569	0.301469	0.108986	0.493951	0.00214261	0.0376533
SL001797	Kallikrein 6	0.264582	0.119943	0.409222	0.000336719	0	0.657088	0.00311922	0.275557	0.083138	0.467977	0.00500364	0.0601841
SL006029	Chitotriosidase-1	-0.265701	-0.411094	-0.120309	0.000341254	0	0.32868	0.00313691	-0.0336925	-0.225972	0.158587	0.731269	0.904885
SL000597	TNF-b	0.255777	0.11491	0.396644	0.000372603	0	0.777179	0.00339894	0.181731	-0.00536193	0.368824	0.0569371	0.244748
SL000283	b2-Microglobulin	-0.329292	-0.511132	-0.147453	0.00038627	0.366864	0.208842	0.00349691	-0.402731	-0.594146	-0.211317	3.72815e-05	0.00405013
SL003176	I-309	0.26228	0.117295	0.407265	0.000391698	0	0.956388	0.00351939	0.125141	-0.0672711	0.317552	0.202408	0.526967
SL000603	Trypsin	-0.258842	-0.402125	-0.115559	0.000399065	0	0.741233	0.00355882	-0.230134	-0.420794	-0.0394747	0.0179931	0.124287
SL002602	Trefoil factor 2	-0.258898	-0.402319	-0.115478	0.000403054	0	0.605354	0.00356778	-0.202264	-0.393	-0.0115273	0.0376711	0.190929
SL003303	CCL28	-0.38363	-0.596367	-0.170892	0.000408693	0.539907	0.140409	0.00359109	-0.0187592	-0.206827	0.169309	0.845001	0.94637
SL005197	LIMP II	0.260585	0.115056	0.406114	0.000448912	0	0.849247	0.00391569	0.237189	0.043551	0.430826	0.0163602	0.116133
SL005629	NAGK	-0.259895	-0.405283	-0.114506	0.000458994	0	0.79498	0.00397462	-0.429873	-0.684679	-0.175067	0.000944427	0.0256498
SL008728	NRX3B	-0.351283	-0.548009	-0.154557	0.000465612	0.46759	0.170533	0.00400292	-0.23854	-0.592223	0.115142	0.186203	0.50033
SL007025	JAK2	-0.257257	-0.401702	-0.112811	0.000481781	0	0.78497	0.0041075	-0.146375	-0.338292	0.0455428	0.134952	0.416008
SL014470	BCAR3	0.280168	0.122787	0.437549	0.00048465	0.155612	0.276484	0.0041075	0.280426	-0.0347828	0.595634	0.081214	0.31106
SL003187	MDC	0.256678	0.111996	0.401361	0.000506792	0	0.87045	0.0042649	-0.0375363	-0.228353	0.153281	0.699829	0.886846
SL005730	cGMP-stimulated PDE	0.258834	0.112589	0.40508	0.000522656	0.0183814	0.312821	0.00436765	0.197419	-0.00905525	0.403893	0.0609295	0.258172
SL004118	TrATPase	-0.288472	-0.451556	-0.125389	0.000526479	0.212384	0.259832	0.00436904	-0.0554577	-0.246681	0.135765	0.569749	0.819314
SL000565	Renin	-0.255788	-0.400587	-0.110989	0.000535599	0	0.413473	0.00441408	-0.255007	-0.447571	-0.0624429	0.00944473	0.0837268
SL005213	RELT	-0.256016	-0.40131	-0.110723	0.000553196	0	0.69961	0.00452787	-0.275984	-0.46916	-0.082808	0.00510813	0.0601841
SL003167	BLC	-0.255186	-0.400152	-0.11022	0.000560245	0	0.416397	0.00455437	-0.179142	-0.422656	0.0643722	0.149344	0.445052
SL003524	Protein disulfide isomerase A3	0.254536	0.109612	0.399459	0.000576628	0	0.401633	0.00465588	0.35432	0.0931907	0.615449	0.00782737	0.0754331
SL009089	PGCB	-0.254191	-0.399481	-0.108901	0.000605741	0	0.408425	0.00483631	-0.316241	-0.509491	-0.122991	0.00133964	0.0276012
SL003690	RANK	0.253065	0.108393	0.397736	0.000607068	0	0.692862	0.00483631	0.308885	0.0959076	0.521862	0.00447512	0.0560573
SL008623	CNTN2	-0.406361	-0.639284	-0.173438	0.000627632	0.614332	0.107343	0.00494632	-0.367874	-0.584074	-0.151674	0.000853109	0.024273
SL002763	Kallikrein 11	-0.252252	-0.396927	-0.107576	0.000632371	0	0.44542	0.00494632	-0.0792843	-0.271104	0.112536	0.417881	0.737365
SL009341	BASI	0.246727	0.105134	0.388321	0.000637236	0	0.604402	0.00494632	0.16087	-0.0274117	0.349152	0.0940097	0.3394
SL008760	SLIK1	0.251765	0.107277	0.396253	0.000637433	0	0.337677	0.00494632	0.273075	0.0353265	0.510823	0.0243734	0.144907
SL018509	RSPO3	-0.253031	-0.398472	-0.107589	0.000650019	0	0.966878	0.00501143	-0.284377	-0.477904	-0.0908509	0.00397589	0.0522108
SL018629	RNF43	0.251219	0.105991	0.396448	0.000697953	0	0.731185	0.0053465	0.280071	0.0868245	0.473317	0.00450335	0.0560573
SL000454	HSP 90b	0.269644	0.113624	0.425664	0.000705757	0.134672	0.282373	0.00537184	-0.00138254	-0.317722	0.314957	0.993165	0.997548
SL014268	OX2G	-0.248965	-0.393336	-0.104594	0.000725042	0	0.683304	0.00548371	-0.228089	-0.420198	-0.0359793	0.0199633	0.127738
SL002731	Fas, soluble	-0.249856	-0.394859	-0.104854	0.000732162	0	0.86794	0.00550273	-0.273005	-0.465954	-0.0800552	0.00555152	0.0620006
SL003872	gp130, soluble	-0.246598	-0.390483	-0.102712	0.000782061	0	0.835028	0.00584102	-0.205533	-0.396954	-0.0141113	0.0353393	0.18553
SL002762	CgA	-0.245548	-0.389873	-0.101222	0.000854271	0	0.992452	0.00634071	-0.14245	-0.334217	0.0493173	0.145416	0.436614
SL013570	DYRK3	0.244974	0.100045	0.389904	0.00092326	0	0.562841	0.00681047	0.298731	0.10598	0.491483	0.0023847	0.0385222
SL003974	Activated Protein C	0.243291	0.0983346	0.388248	0.00100348	0	0.883911	0.0073568	0.361844	0.16923	0.554458	0.000231436	0.0131698
SL004804	Nectin-like protein 1	0.242354	0.0976576	0.38705	0.00102792	0	0.466623	0.00749002	0.265379	0.0385788	0.492179	0.0218276	0.133611
SL000462	IGFBP-1	-0.729999	-1.16753	-0.292467	0.00107512	0.898304	0.00171389	0.00778651	-0.192312	-0.515662	0.131038	0.243742	0.570886
SL002706	CD23	0.241228	0.0963451	0.38611	0.00110116	0	0.715293	0.00792702	-0.144527	-0.334364	0.0453098	0.135656	0.416582
SL002525	C2	0.242042	0.0963533	0.38773	0.00112907	0	0.52288	0.00803612	0.100334	-0.0930997	0.293768	0.309328	0.647367
SL010493	CAMK2D	0.240872	0.0958798	0.385864	0.00112976	0	0.809977	0.00803612	0.255141	0.0624333	0.447848	0.0094604	0.0837268
SL004856	Desmoglein-1	0.240502	0.0955656	0.385439	0.0011448	0	0.881406	0.00809491	0.0886988	-0.103717	0.281115	0.366265	0.704413
SL007869	PPIB	0.239664	0.0949611	0.384366	0.0011696	0	0.700523	0.00812234	0.235999	0.0434956	0.428503	0.0162696	0.116133
SL003643	Glutathione S-transferase Pi	-0.238763	-0.382978	-0.0945476	0.00117484	0	0.331327	0.00812234	-0.130736	-0.34542	0.0839475	0.232649	0.557524
SL010470	Semaphorin 3E	-0.242682	-0.389268	-0.0960968	0.00117511	0.0148766	0.313684	0.00812234	-0.164461	-0.357925	0.0290035	0.0956871	0.34343
SL004805	Nectin-like protein 2	-0.239951	-0.384895	-0.0950071	0.00117587	0	0.334122	0.00812234	-0.144337	-0.359169	0.0704957	0.187901	0.50033
SL000459	IgA	-0.242895	-0.390641	-0.0951488	0.00127217	0.0341435	0.308905	0.00873705	-0.357551	-0.550408	-0.164693	0.000279381	0.0133544
SL000550	PCI	-0.237105	-0.381832	-0.0923775	0.00132282	0	0.854094	0.00903296	-0.168043	-0.36052	0.0244342	0.0870526	0.321564
SL005194	JAM-C	-0.236318	-0.381831	-0.0908057	0.00145727	0	0.84974	0.00989452	-0.254715	-0.453731	-0.0556987	0.0121245	0.0946979
SL004723	HDAC8	0.234579	0.0898237	0.379335	0.00149238	0	0.94517	0.0100369	0.268971	0.0764072	0.461534	0.00618783	0.0657486
SL011069	Marapsin	0.23519	0.0900338	0.380345	0.00149504	0	0.617297	0.0100369	0.351722	0.105725	0.597718	0.00507354	0.0601841
SL003919	kallikrein 14	0.23448	0.0891959	0.379765	0.00156011	0	0.776312	0.0104153	0.26977	0.0765242	0.463015	0.00621723	0.0657486
SL001728	PDGFRA	-0.275399	-0.446197	-0.104602	0.00157603	0.27787	0.239287	0.0104631	-0.122144	-0.529842	0.285553	0.557073	0.818177
SL006924	ART	-0.234426	-0.379915	-0.0889366	0.00158815	0	0.69396	0.0104853	0.147284	-0.0658462	0.360414	0.175597	0.485737
SL010381	Soggy-1	0.233253	0.0879942	0.378512	0.00164809	0	0.649184	0.0107742	0.31974	0.108485	0.530996	0.00301253	0.0428569
SL010518	TEC	0.233228	0.0879694	0.378486	0.00164993	0	0.629568	0.0107742	0.168946	-0.0242593	0.362151	0.0865533	0.32146
SL007871	Cytidylate kinase	0.232686	0.0876392	0.377732	0.0016654	0	0.962034	0.0108161	0.305385	0.112596	0.498174	0.00190505	0.0350236
SL005208	Nogo Receptor	0.237729	0.0874981	0.387959	0.00192544	0.0783155	0.297588	0.0124373	-0.184296	-0.595916	0.227325	0.380194	0.714461
SL003060	bFGF-R	-0.228101	-0.372825	-0.0833765	0.00200756	0	0.728286	0.012898	-0.117437	-0.309775	0.0749008	0.23142	0.557524
SL016567	TAK1-TAB1	0.246813	0.0899833	0.403644	0.00203882	0.144487	0.279629	0.0130288	0.236959	0.0441103	0.429807	0.0160285	0.116085
SL008837	CD63	0.227492	0.082752	0.372232	0.00206633	0	0.85715	0.0131344	0.276078	0.083551	0.468605	0.00494598	0.0601841
SL001802	IFN-g	-0.228415	-0.374016	-0.0828135	0.00210694	0	0.958209	0.0133217	-0.218251	-0.411991	-0.0245108	0.0272494	0.155347
SL000613	uPA	-0.226456	-0.371111	-0.0818007	0.00215281	0	0.833703	0.01354	-0.188954	-0.386736	0.00882821	0.0611404	0.258172
SL018256	CHKB	0.301979	0.108977	0.494982	0.00216484	0.433995	0.183782	0.0135444	0.311261	0.00393623	0.618587	0.047137	0.220034
SL011180	HXK1	0.306423	0.106151	0.506695	0.00271032	0.475012	0.167541	0.0168689	0.331501	0.0225645	0.640437	0.0354554	0.18553
SL012108	PLCG1	0.213589	0.0733433	0.353835	0.00283625	0	0.332902	0.0174922	0.236787	-0.0330614	0.506636	0.0854629	0.31915
SL004594	Troponin I, skeletal, fast twitch	-0.221546	-0.367036	-0.0760573	0.00283974	0	0.546893	0.0174922	-0.13197	-0.325269	0.0613291	0.180859	0.495095
SL014029	SPHK2	0.22108	0.0756912	0.366469	0.00287923	0	0.493999	0.0176445	0.236011	-0.00608236	0.478104	0.0560404	0.242638
SL021043	GDF-11/8	-0.219411	-0.363954	-0.0748687	0.0029283	0	0.847826	0.017788	-0.22512	-0.417451	-0.0327902	0.0217838	0.133611
SL000582	Survivin	0.220493	0.0752167	0.365769	0.00293242	0	0.477462	0.017788	0.229568	0.0362512	0.422884	0.0199386	0.127738
SL007049	CYTF	0.220482	0.0750195	0.365944	0.00297044	0	0.816223	0.0179277	0.156476	-0.0369238	0.349876	0.112792	0.378613
SL004821	S100A4	-0.21999	-0.365329	-0.0746499	0.00301066	0	0.646643	0.0180791	-0.270631	-0.47758	-0.0636819	0.0103748	0.0879286
SL000474	IL-16	0.220407	0.074596	0.366218	0.00304984	0	0.392832	0.0181956	0.098596	-0.0950938	0.292286	0.318424	0.658334
SL003190	MIP-5	-0.21898	-0.36392	-0.0740393	0.00306478	0	0.765314	0.0181956	-0.266742	-0.459537	-0.0739464	0.00669378	0.0695571
SL008909	LGMN	0.21858	0.0738505	0.36331	0.00307574	0	0.34287	0.0181956	0.292397	0.0166131	0.568181	0.0377065	0.190929
SL004712	SDF-1	-0.217424	-0.362266	-0.0725815	0.00325977	0	0.50762	0.0191893	-0.0911816	-0.37947	0.197107	0.535318	0.812175
SL003650	Alpha enolase	0.217565	0.072189	0.362942	0.00335471	0	0.627349	0.0196514	0.0826604	-0.179278	0.344599	0.536239	0.812175
SL000403	Endostatin	-0.293357	-0.490497	-0.0962162	0.00353935	0.465303	0.17145	0.0206318	-0.311349	-0.665996	0.0432978	0.0853093	0.31915
SL002081	Cadherin-5	-0.215678	-0.360831	-0.0705255	0.0035883	0	0.711293	0.0208156	-0.320885	-0.513732	-0.128038	0.00110919	0.0265097
SL003349	HIF-1a	0.23832	0.0776096	0.399031	0.00365545	0.184588	0.268113	0.0210569	0.269817	-0.00385039	0.543484	0.0533116	0.233531
SL004588	IL-1 R AcP	-0.311093	-0.520937	-0.101248	0.00366513	0.526349	0.146219	0.0210569	0.0494654	-0.147705	0.246636	0.622925	0.847831
SL000252	a2-Macroglobulin	-0.21383	-0.358604	-0.0690562	0.00379335	0	0.939292	0.0216892	-0.168369	-0.360956	0.0242169	0.0866193	0.32146
SL004845	EphB4	0.213308	0.0685566	0.358059	0.00387411	0	0.652082	0.0220456	0.298131	0.105702	0.490559	0.00239274	0.0385222
SL007181	TYK2	0.212919	0.0683374	0.357501	0.00389734	0	0.477379	0.0220726	-0.0537834	-0.244767	0.1372	0.580981	0.819684
SL000408	Epo	0.213278	0.0681505	0.358406	0.00397243	0	0.945371	0.0223736	0.0079322	-0.184349	0.200213	0.935558	0.975779
SL010371	CD39	0.213395	0.0681258	0.358664	0.00398793	0	0.724022	0.0223736	0.200144	0.0069041	0.393383	0.0423576	0.210905
SL005491	OBCAM	0.213049	0.0678203	0.358277	0.0040371	0	0.888167	0.0224566	0.321232	0.128263	0.514201	0.00110348	0.0265097
SL007328	JAG1	-0.212136	-0.356754	-0.067517	0.00404031	0	0.46243	0.0224566	-0.266188	-0.548566	0.0161903	0.0646619	0.267207
SL000131	PCNA	0.212539	0.0665565	0.358522	0.00432336	0	0.842129	0.0239186	0.097636	-0.0963007	0.291573	0.323775	0.663656
SL002755	PAPP-A	-0.210677	-0.355814	-0.0655395	0.00444082	0	0.974416	0.0244552	-0.272232	-0.465298	-0.0791655	0.00571617	0.0628855
SL005185	IL-23 R	0.210679	0.0652244	0.356134	0.00452771	0	0.378158	0.0248193	0.258682	0.0651643	0.452201	0.00879422	0.0799897
SL000052	Troponin T	0.209326	0.0645062	0.354145	0.00461162	0	0.501884	0.0251639	0.270596	0.076471	0.46472	0.00629421	0.0659788
SL005173	IL-10 Ra	0.209773	0.0645014	0.355044	0.00465188	0	0.805197	0.0252681	0.214845	0.0216808	0.40801	0.0292611	0.161171
SL004837	Activin AB	0.244087	0.0745926	0.413581	0.00476472	0.263641	0.243878	0.025764	0.0838747	-0.108853	0.276603	0.393675	0.727112
SL005225	TrkA	0.207498	0.0631731	0.351823	0.00483438	0	0.80877	0.0260229	0.128946	-0.0628095	0.320702	0.187511	0.50033
SL005230	UNC5H3	-0.208448	-0.353703	-0.0631941	0.00491332	0	0.67794	0.0262618	-0.147662	-0.340882	0.045558	0.134176	0.415388
SL004869	Carbonic anhydrase XIII	-0.207544	-0.3522	-0.0628884	0.00492271	0	0.838993	0.0262618	-0.0498153	-0.241675	0.142044	0.610827	0.841912
SL000479	IL-3	0.207699	0.0627962	0.352602	0.00496417	0	0.552086	0.0262868	0.2515	0.0587434	0.444256	0.0105497	0.0887807
SL003685	PBEF	0.208101	0.0628935	0.353308	0.0049714	0	0.83638	0.0262868	-0.0576097	-0.249175	0.133955	0.555577	0.818177
SL010458	Endocan	-0.207918	-0.353314	-0.0625223	0.00506649	0	0.3455	0.0266316	-0.149236	-0.362856	0.064383	0.170922	0.479463
SL012822	BSSP4	-0.381245	-0.647936	-0.114554	0.00508117	0.716614	0.060313	0.0266316	-0.312138	-0.500252	-0.124023	0.00114532	0.0266337
SL006480	TRY3	0.205928	0.060343	0.351513	0.00556546	0	0.334091	0.0290425	0.217943	0.0242502	0.411637	0.0274295	0.155347
SL002519	ERBB3	0.205014	0.0595955	0.350432	0.00572377	0	0.677459	0.0297387	0.213922	0.0204865	0.407356	0.0301935	0.164047
SL003173	Gro-a	0.204388	0.0591721	0.349604	0.00580487	0	0.891058	0.0300295	0.262452	0.069276	0.455627	0.00774842	0.0752794
SL000525	MMP-7	-0.383381	-0.655954	-0.110808	0.00583816	0.721859	0.0579431	0.0300715	-0.397568	-0.587897	-0.207239	4.23878e-05	0.00418944
SL000540	Plasmin	0.204428	0.0589182	0.349937	0.00589488	0	0.381783	0.0302334	0.159041	-0.034457	0.35254	0.107191	0.36494
SL012740	ATS15	0.204428	0.0584964	0.350359	0.00603981	0	0.644598	0.0308225	-0.10228	-0.294558	0.0899981	0.297144	0.634831
SL005764	sCD163	0.203336	0.0581221	0.348549	0.00606134	0	0.319808	0.0308225	-0.170421	-0.484252	0.14341	0.287179	0.625098
SL013165	HMGN1	0.241314	0.0686847	0.413943	0.00614799	0.292302	0.234554	0.0311307	0.118515	-0.0737671	0.310796	0.227031	0.553678
SL010450	CD48	-0.20244	-0.347633	-0.0572464	0.00628114	0	0.674088	0.0316707	-0.271234	-0.464338	-0.0781301	0.00590578	0.0635803
SL004357	Myostatin	0.271992	0.0760765	0.467907	0.00650761	0.449069	0.177897	0.0326748	0.30428	0.030696	0.577865	0.029267	0.161171
SL007295	CAD15	0.201036	0.0557306	0.346342	0.00669413	0	0.860176	0.0334707	0.333521	0.140535	0.526507	0.000706012	0.0216329
SL001795	IL-1b	0.199907	0.0551366	0.344677	0.00680114	0	0.835075	0.033864	0.105181	-0.15098	0.361342	0.420953	0.737365
SL003744	Galectin-3	-0.199929	-0.345378	-0.0544803	0.00705787	0	0.739725	0.0349965	-0.181322	-0.374847	0.0122028	0.0663019	0.270412
SL004720	Calcineurin B a	0.199571	0.0540614	0.34508	0.00718487	0	0.714215	0.035479	0.262274	0.0501818	0.474366	0.0153633	0.112633
SL006610	ATS13	0.199175	0.053558	0.344792	0.00734376	0	0.71008	0.0361144	0.197049	-0.173867	0.567964	0.297769	0.634831
SL010488	ABL2	0.197868	0.0530089	0.342726	0.00742438	0	0.584157	0.0363612	0.246368	0.050861	0.441874	0.013517	0.100955
SL003869	MIC-1	-0.309198	-0.536012	-0.0823847	0.00754289	0.593606	0.116729	0.0367908	-0.294867	-0.486295	-0.10344	0.00253572	0.0385222
SL003320	VEGF-D	-0.197028	-0.342166	-0.0518905	0.00779782	0	0.353314	0.0378797	-0.161433	-0.435607	0.112742	0.248493	0.572166
SL004724	MOZ	0.197488	0.0517092	0.343267	0.00792654	0	0.62831	0.0383491	0.0918098	-0.101973	0.285593	0.353104	0.693173
SL010519	ZAP70	0.205952	0.0536217	0.358283	0.00805182	0.0938008	0.293497	0.0387981	0.204733	-0.00578103	0.415246	0.056632	0.244315
SL014069	PCSK7	0.195532	0.0507038	0.340361	0.00814164	0	0.35195	0.0390733	0.132888	-0.19021	0.455985	0.420174	0.737365
SL001902	BCAM	-0.195404	-0.340819	-0.0499895	0.0084449	0	0.84687	0.0403666	-0.176997	-0.370274	0.0162808	0.0726751	0.287572
SL004863	TAJ	-0.192497	-0.336065	-0.0489289	0.00859054	0.006101	0.31583	0.0408992	-0.116513	-0.306494	0.073468	0.229355	0.554816
SL004687	TSLP	0.195161	0.0491758	0.341146	0.00878815	0	0.978968	0.041674	0.0803485	-0.113668	0.274365	0.416972	0.737365
SL007560	STAB2	0.195016	0.0487	0.341333	0.008993	0.0181547	0.312877	0.0424768	0.287234	0.0830857	0.491382	0.00582196	0.0632476
SL001721	PECAM-1	0.194302	0.0483592	0.340245	0.0090698	0	0.395945	0.0426709	0.103161	-0.0906411	0.296964	0.296813	0.634831
SL000506	Luteinizing hormone	-0.191937	-0.337261	-0.0466138	0.00963562	0	0.624598	0.0451552	-0.316628	-0.509526	-0.123729	0.00129481	0.0276012
SL016128	TXD12	-0.210767	-0.370916	-0.0506183	0.00989576	0.17573	0.2707	0.0461931	-0.160836	-0.498137	0.176465	0.350008	0.693173
SL004939	PTP-1B	0.18986	0.0446862	0.335034	0.0103693	0	0.564489	0.0482154	0.254386	0.0612823	0.44749	0.00982391	0.0856903
SL016969	CSRP3	-0.189469	-0.334919	-0.0440181	0.0106765	0	0.919836	0.0491619	-0.171395	-0.389111	0.0463204	0.122838	0.393544
SL000481	IL-5	0.190429	0.0442386	0.336618	0.0106778	0	0.832646	0.0491619	0.156331	-0.0381917	0.350854	0.115221	0.379309
SL018587	ISLR2	0.189585	0.0440082	0.335161	0.0106963	0	0.462777	0.0491619	0.197988	0.00427924	0.391697	0.0451492	0.216302
SL004363	SCGF-alpha	-0.189445	-0.335133	-0.0437568	0.0108147	0	0.913578	0.0495155	-0.248997	-0.442794	-0.0551999	0.0117947	0.0936212
SL003196	TARC	-0.1877	-0.332698	-0.0427018	0.0111752	0	0.831073	0.050971	-0.0861605	-0.369225	0.196904	0.550786	0.818177
SL018887	QORL1	0.291427	0.0657007	0.517152	0.011392	0.586459	0.119937	0.051762	0.29653	0.104279	0.488781	0.00250228	0.0385222
SL010379	Semaphorin 3A	0.187194	0.0419678	0.33242	0.0115252	0	0.366997	0.0521689	0.213695	0.020456	0.406933	0.0302011	0.164047
SL004159	TRAIL R4	0.208465	0.0464191	0.370511	0.0116886	0.190405	0.266401	0.0527091	0.114788	-0.078698	0.308275	0.244921	0.571642
SL003542	NG36	-0.36938	-0.657171	-0.081588	0.0118827	0.753253	0.0440998	0.053383	-0.134039	-0.342077	0.0739989	0.206659	0.529952
SL004067	GX	-0.207595	-0.370248	-0.0449428	0.012366	0.195058	0.265023	0.0553458	-0.0280949	-0.226704	0.170514	0.781586	0.921809
SL004362	SCGF-beta	-0.184992	-0.330742	-0.039242	0.0128584	0	0.823285	0.0573348	-0.209947	-0.403884	-0.0160099	0.0338577	0.179026
SL008372	FLRT3	-0.183912	-0.329177	-0.0386471	0.0130866	0	0.463555	0.0579417	0.022541	-0.16979	0.214872	0.81832	0.931126
SL000250	a2-Antiplasmin	0.183744	0.0386042	0.328885	0.0130914	0	0.499888	0.0579417	0.351167	0.158764	0.54357	0.000347217	0.0148187
SL004876	Kallistatin	-0.184112	-0.329675	-0.0385489	0.0131746	0	0.77436	0.0580946	0.133072	-0.212751	0.478894	0.450735	0.765302
SL006230	Lumican	-0.182732	-0.327478	-0.0379861	0.0133489	0	0.901272	0.0585793	-0.347355	-0.53927	-0.15544	0.000389012	0.01603
SL013969	KYNU	0.27126	0.0562906	0.48623	0.0133914	0.549867	0.136095	0.0585793	0.0169442	-0.3336	0.367489	0.924523	0.975151
SL011068	IL-17 RC	-0.183739	-0.329413	-0.0380656	0.0134316	0	0.645528	0.0585793	-0.18982	-0.426978	0.0473379	0.116707	0.379697
SL003918	kallikrein 13	-0.182637	-0.328443	-0.0368298	0.014087	0	0.485273	0.0610262	-0.00883913	-0.202271	0.184592	0.928634	0.975151
SL004637	MSP R	0.182127	0.0366815	0.327573	0.0141172	0	0.496374	0.0610262	0.117816	-0.0757166	0.311349	0.232807	0.557524
SL009045	ENPP7	0.181529	0.036518	0.326541	0.0141458	0	0.318796	0.0610262	-0.0979089	-0.368044	0.172226	0.477469	0.777822
SL003326	I-TAC	-0.181371	-0.326477	-0.0362657	0.0142931	0	0.922667	0.0614398	-0.316528	-0.50923	-0.123826	0.00128463	0.0276012
SL004852	B7-H1	-0.181501	-0.327116	-0.0358866	0.0145659	0	0.536864	0.062388	-0.250548	-0.44418	-0.0569162	0.0112103	0.0917553
SL010288	Carbonic anhydrase 6	-0.181034	-0.326632	-0.0354367	0.0148098	0	0.812215	0.0630257	0.0693934	-0.123117	0.261904	0.479878	0.77841
SL010490	CAMK1D	0.180339	0.0352854	0.325392	0.0148203	0	0.574153	0.0630257	0.231314	0.0386649	0.423963	0.018606	0.126331
SL000530	OSM	0.179003	0.0335421	0.324464	0.015869	0	0.531621	0.0672461	0.149879	-0.0436675	0.343426	0.129074	0.404858
SL016563	GHC2	0.179181	0.0332206	0.325142	0.016126	0	0.61044	0.0680442	0.115382	-0.078775	0.309539	0.244119	0.570886
SL005165	Galectin-4	0.222084	0.0410685	0.403099	0.0161885	0.353915	0.213463	0.0680442	0.0165722	-0.175461	0.208605	0.865685	0.955746
SL000545	Prekallikrein	0.282643	0.0521818	0.513105	0.0162281	0.603726	0.112161	0.0680442	0.335397	0.143217	0.527576	0.000624879	0.0203214
SL002071	Gastrin-releasing peptide	0.175774	0.0322737	0.319275	0.0163608	0	0.663688	0.0683607	0.18298	-0.00776913	0.373728	0.0600896	0.256454
SL006397	NRP1	-0.177461	-0.322673	-0.0322483	0.0166101	0	0.866395	0.0691605	-0.156568	-0.349792	0.0366557	0.112253	0.377865
SL018921	HEMK2	-0.176861	-0.321668	-0.0320549	0.0166735	0	0.458856	0.0691835	0.0561889	-0.386908	0.499286	0.803715	0.928154
SL001999	MDM2	0.177232	0.0309839	0.32348	0.0175395	0	0.749669	0.0725248	0.0882766	-0.106105	0.282658	0.373412	0.707825
SL000134	Met	-0.393532	-0.719088	-0.0679758	0.0178265	0.803472	0.0240874	0.0734574	-0.16924	-0.440459	0.101978	0.221323	0.548057
SL000357	Coagulation Factor IX	0.273468	0.0467415	0.500195	0.0180775	0.587312	0.119555	0.0742359	0.129806	-0.0629728	0.322585	0.186927	0.50033
SL004872	EDAR	-0.174523	-0.319304	-0.0297415	0.0181479	0	0.720139	0.0742696	-0.106441	-0.316957	0.104075	0.321689	0.662328
SL011509	PYY	-0.174196	-0.319113	-0.0292788	0.0184753	0	0.684596	0.0753514	0.0136438	-0.178494	0.205781	0.889309	0.96692
SL000007	ER	0.173605	0.0278588	0.319351	0.0195641	0	0.401621	0.0795208	0.0655229	-0.128162	0.259207	0.507298	0.793484
SL011404	PDE4D	0.180448	0.0285055	0.33239	0.0199297	0.0892619	0.294703	0.0807324	0.247541	0.0547966	0.440285	0.01183	0.0936212
SL009791	hnRNP A/B	0.172177	0.0269741	0.31738	0.0201222	0	0.707081	0.0808167	0.0933194	-0.0995561	0.286195	0.34298	0.686418
SL000324	C8	0.17176	0.0268532	0.316667	0.0201699	0	0.669249	0.0808167	0.133419	-0.0593289	0.326167	0.174884	0.484887
SL010505	MATK	0.172166	0.0268793	0.317453	0.020202	0	0.642587	0.0808167	0.079657	-0.113506	0.27282	0.418944	0.737365
SL000441	HGF	0.17249	0.0269077	0.318073	0.0202211	0	0.571618	0.0808167	-0.0300547	-0.22297	0.162861	0.760102	0.914725
SL006119	TFF3	-0.380872	-0.703663	-0.0580819	0.0207428	0.807664	0.0225967	0.0826254	-0.192836	-0.379457	-0.00621613	0.0428419	0.212007
SL001737	STRATIFIN	0.306591	0.0458608	0.567322	0.0211829	0.690831	0.0721032	0.0840981	0.315138	-0.127954	0.75823	0.163325	0.467259
SL004140	Ephrin-A4	-0.170143	-0.315591	-0.0246953	0.0218628	0	0.748625	0.0863436	-0.263273	-0.456631	-0.0699143	0.00761578	0.0752137
SL001996	Angiopoietin-2	0.169307	0.0244717	0.314143	0.0219562	0	0.433229	0.0863436	-0.193559	-0.504186	0.117069	0.221975	0.548057
SL004984	14-3-3E	-0.17008	-0.315587	-0.0245736	0.0219652	0	0.341424	0.0863436	-0.21209	-0.405689	-0.0184909	0.0317804	0.168789
SL015510	UCRP	-0.169742	-0.315421	-0.024062	0.0223896	0	0.676213	0.0877232	-0.238732	-0.432244	-0.0452194	0.0156076	0.113726
SL004867	Carbonic anhydrase III	-0.169295	-0.314747	-0.0238419	0.0225347	0	0.618491	0.0880033	-0.357243	-0.549903	-0.164583	0.000278744	0.0133544
SL009988	ADAM12	0.19766	0.0271079	0.368212	0.0231177	0.288085	0.235945	0.0897876	-0.0650168	-0.254944	0.124911	0.502257	0.788695
SL000006	PAI-1	0.235436	0.0322528	0.43862	0.0231419	0.494479	0.159585	0.0897876	0.0444491	-0.315992	0.40489	0.809013	0.928154
SL004685	Persephin	0.168204	0.0224165	0.313991	0.0237387	0	0.554614	0.0918051	-0.0646193	-0.257564	0.128326	0.51156	0.797019
SL005183	IL-22BP	0.167345	0.0220893	0.3126	0.0239444	0	0.910587	0.092302	0.0493913	-0.160607	0.25939	0.644813	0.859658
SL008614	EFNB1	-0.158818	-0.296907	-0.020729	0.0241848	0	0.824087	0.0929288	0.0655896	-0.117148	0.248327	0.481754	0.77841
SL001718	IL-13	0.167504	0.0214091	0.3136	0.0246285	0	0.610868	0.0942285	0.0946539	-0.153231	0.342538	0.454215	0.765302
SL000573	SAP	0.224666	0.0286436	0.420687	0.0246808	0.449093	0.177887	0.0942285	0.177596	-0.14241	0.497601	0.276713	0.609569
SL000382	CK-MB	0.165828	0.0209258	0.31073	0.0248962	0	0.437126	0.0947484	0.136874	-0.0559346	0.329683	0.164113	0.467259
SL008945	TGM3	-0.166028	-0.311338	-0.0207172	0.0251299	0	0.351174	0.0953342	-0.123382	-0.316429	0.0696643	0.210323	0.534695
SL004182	GV	0.166641	0.0203899	0.312892	0.0255347	0	0.665172	0.0961399	0.0445719	-0.149763	0.238907	0.65305	0.860832
SL008085	3HIDH	0.166029	0.0202736	0.311784	0.0255765	0	0.72343	0.0961399	0.233169	0.0393779	0.42696	0.0183626	0.126111
SL011400	PDE1A	-0.165146	-0.310134	-0.0201588	0.0255837	0	0.859768	0.0961399	-0.195729	-0.388614	-0.00284437	0.0467159	0.218924
SL004183	P-Cadherin	0.165369	0.0198106	0.310927	0.0259662	0	0.81967	0.0972715	0.239564	-0.0134352	0.492563	0.0634703	0.263358
SL018548	alpha-1-antichymotrypsin complex	-0.163367	-0.308425	-0.0183094	0.0272893	0	0.621714	0.101909	-0.138047	-0.331064	0.0549698	0.160981	0.465792
SL000383	CK-MM	0.162489	0.0176819	0.307296	0.0278574	0	0.403019	0.103421	0.0918703	-0.100723	0.284464	0.349822	0.693173
SL006713	Collectin Kidney 1	0.16176	0.0175933	0.305927	0.0278675	0	0.941867	0.103421	-0.0462181	-0.29393	0.201494	0.714596	0.895297
SL010492	CAMK2B	0.156336	0.0160763	0.296595	0.0289173	0	0.670256	0.106787	0.167694	-0.0949992	0.430388	0.210872	0.534695
SL000509	Lymphotoxin b R	0.162274	0.0166545	0.307893	0.028953	0	0.784167	0.106787	0.100279	-0.0934157	0.293973	0.310247	0.647465
SL004304	STX1a	0.300541	0.0306622	0.570419	0.029062	0.710071	0.0632856	0.106859	0.218857	0.0262574	0.411457	0.025936	0.152654
SL006629	SIRT2	0.158134	0.01548	0.300788	0.0298068	0	0.990953	0.109261	0.22165	0.0320974	0.411203	0.0219144	0.133611
SL003704	BID	-0.159987	-0.304578	-0.0153962	0.0301082	0	0.902943	0.110028	-0.136282	-0.328664	0.0560996	0.165007	0.467259
SL000560	P-Selectin	-0.160144	-0.305279	-0.0150094	0.0305676	0	0.460821	0.111367	0.0159442	-0.176579	0.208468	0.871056	0.955746
SL007640	CLC7A	0.158891	0.0131055	0.304677	0.0326667	0	0.976719	0.118653	0.0469398	-0.146783	0.240662	0.634853	0.853406
SL001905	Mesothelin	-0.154203	-0.295854	-0.0125532	0.0328708	0	0.756693	0.119032	-0.172597	-0.36099	0.0157961	0.0725536	0.287572
SL004752	DRR1	0.177261	0.0134808	0.341042	0.0338975	0.313326	0.22752	0.122379	0.274883	0.0946556	0.45511	0.00279581	0.0407439
SL004305	Topoisomerase I	0.157739	0.0116625	0.303815	0.034307	0	0.3691	0.123485	0.0611762	-0.132625	0.254977	0.536119	0.812175
SL004742	Afamin	0.29418	0.0211709	0.567189	0.0346906	0.716909	0.0601792	0.12449	-0.0231246	-0.574169	0.52792	0.934448	0.975779
SL008591	TFF1	-0.186936	-0.360646	-0.0132258	0.0349282	0.300961	0.231677	0.124967	-0.088212	-0.280956	0.104532	0.369717	0.707825
SL011211	IF4G2	-0.148443	-0.286979	-0.00990661	0.0357184	0	0.535863	0.127413	0.00206114	-0.181763	0.185885	0.982467	0.994993
SL000532	ON	0.156027	0.0102928	0.301762	0.0358706	0	0.749367	0.127576	0.258977	0.0652459	0.452709	0.00879167	0.0799897
SL003198	Tenascin	-0.15411	-0.298643	-0.00957665	0.0366331	0	0.354146	0.129901	-0.074177	-0.51732	0.368967	0.742855	0.908078
SL000089	TGF-b3	0.153712	0.00936873	0.298055	0.0368721	0	0.583679	0.130361	-0.0233189	-0.214728	0.168091	0.811279	0.928154
SL000537	PDGF-BB	0.154261	0.00908071	0.299442	0.0372918	0	0.472293	0.131324	0.157476	-0.0357271	0.35068	0.110148	0.37394
SL002522	Rb	0.154637	0.0090474	0.300228	0.0373642	0	0.460755	0.131324	0.230421	0.0367891	0.424053	0.0196824	0.127738
SL006916	LCK	0.154115	0.00793499	0.300295	0.0387949	0	0.733311	0.135372	0.0428051	-0.151474	0.237084	0.665861	0.866792
SL004844	EphA5	-0.15943	-0.310676	-0.00818512	0.0388253	0.0711496	0.299459	0.135372	-0.0116063	-0.205016	0.181803	0.906372	0.973463
SL003711	Caspase-3	-0.153669	-0.299471	-0.00786653	0.0388558	0.0054002	0.316	0.135372	0.0186768	-0.174233	0.211586	0.8495	0.950517
SL016553	PDE3A	0.176951	0.00837813	0.345525	0.0396502	0.254891	0.246666	0.137456	0.217192	0.0239081	0.410476	0.0276371	0.155785
SL000539	PHI	0.15262	0.00720133	0.298039	0.0396839	0	0.792921	0.137456	-0.0719512	-0.350998	0.207095	0.613299	0.842546
SL005688	14-3-3 protein zeta/delta	-0.152572	-0.298061	-0.00708314	0.0398418	0	0.910918	0.137604	-0.0360552	-0.229399	0.157289	0.714739	0.895297
SL000470	IL-11	0.15202	0.00667866	0.297361	0.0403617	0	0.585279	0.138998	0.0578573	-0.135315	0.251029	0.557182	0.818177
SL003322	VEGF sR3	-0.151474	-0.296572	-0.00637652	0.0407468	0	0.785793	0.139921	-0.140544	-0.33352	0.0524324	0.153455	0.450561
SL014289	KI3S1	0.153772	0.00619051	0.301353	0.0411339	0.0330048	0.30919	0.140845	0.130292	-0.0692804	0.329864	0.200695	0.523648
SL001945	sE-Selectin	0.211186	0.00821285	0.41416	0.0414232	0.491753	0.160709	0.14143	-0.190842	-0.622437	0.240752	0.386131	0.718732
SL004915	NCC27	0.150973	0.00568586	0.29626	0.0416833	0	0.78227	0.141913	0.309864	0.117095	0.502633	0.00162979	0.03246
SL004871	DR6	-0.150463	-0.295375	-0.0055513	0.0418462	0	0.972788	0.142063	-0.17016	-0.362967	0.0226466	0.0836747	0.316428
SL000554	PKC-D	0.150202	0.00511275	0.295291	0.0424552	0	0.913686	0.143722	0.279796	0.0871044	0.472489	0.00442799	0.0560573
SL010388	Trypsin 2	-0.149117	-0.2933	-0.00493481	0.0426577	0	0.966178	0.144	-0.192623	-0.411187	0.0259404	0.0841059	0.317055
SL007696	C1QR1	-0.242178	-0.47701	-0.00734563	0.0432516	0.617564	0.10587	0.145306	-0.178869	-0.458752	0.101013	0.210355	0.534695
SL004301	Ku70	0.150055	0.00447707	0.295633	0.0433585	0	0.38408	0.145306	0.0620015	-0.150586	0.274589	0.567575	0.819308
SL000133	MIP-3a	0.14983	0.00443502	0.295224	0.0434094	0	0.917945	0.145306	0.0670901	-0.126252	0.260432	0.496433	0.784315
SL004858	GFRa-1	0.310076	0.00857862	0.611573	0.043828	0.769595	0.037223	0.146298	-0.1812	-0.651525	0.289125	0.450185	0.765302
SL004400	Coagulation Factor IXab	0.281304	0.00746489	0.555144	0.0440733	0.717217	0.0600401	0.146706	0.100262	-0.0922233	0.292747	0.307298	0.644247
SL000002	VEGF	0.22485	0.00527824	0.444422	0.0447412	0.557016	0.132976	0.148281	0.195849	0.00229385	0.389404	0.047346	0.22015
SL004482	Endoglin	-0.154791	-0.305986	-0.00359601	0.0447944	0.0759446	0.298209	0.148281	-0.141023	-0.373797	0.0917506	0.235062	0.55956
SL006694	CNDP1	0.29264	0.0060352	0.579245	0.045367	0.74691	0.0468389	0.149761	0.268643	-0.0847125	0.621998	0.136201	0.416582
SL000622	Coagulation Factor V	-0.159764	-0.31641	-0.00311757	0.0456115	0.151622	0.277617	0.150153	-0.00872661	-0.229908	0.212455	0.938362	0.975779
SL006777	FETUB	0.146005	0.00216607	0.289843	0.0466483	0	0.58123	0.152431	0.189803	-0.00155933	0.381166	0.0518963	0.23129
SL004760	PAFAH beta subunit	-0.145485	-0.288828	-0.00214177	0.0466737	0	0.617387	0.152431	-0.107812	-0.298552	0.0829283	0.267936	0.595356
SL010375	ASAH2	0.147962	0.00217004	0.293753	0.0466861	0	0.988451	0.152431	0.0507129	-0.36054	0.461966	0.809021	0.928154
SL000309	C1q	-0.147455	-0.293161	-0.00174893	0.0473128	0	0.652763	0.153918	-0.093865	-0.287671	0.0999408	0.342488	0.686418
SL000440	Hemopexin	-0.147405	-0.293119	-0.00169153	0.0473991	0	0.949238	0.153918	-0.164159	-0.358062	0.0297438	0.0970524	0.345036
SL005685	EF-1-beta	-0.146998	-0.292734	-0.0012627	0.0480478	0	0.642847	0.155602	-0.0692256	-0.263027	0.124575	0.483866	0.77841
SL008381	CATF	-0.18896	-0.376914	-0.00100659	0.0487856	0.397657	0.197579	0.157564	-0.107039	-0.345246	0.131168	0.378471	0.713364
SL004345	GDF-11	0.146473	0.000410456	0.292536	0.0493597	0	0.738958	0.158989	0.150357	-0.0439815	0.344696	0.129419	0.404858
SL005236	NovH	-0.145827	-0.291537	-0.000116573	0.049817	0	0.61062	0.16003	-0.104619	-0.298431	0.0891938	0.290067	0.629738
SL010384	Testican-1	-0.208012	-0.416994	0.000968878	0.0510717	0.517659	0.149905	0.163258	-0.0205732	-0.414264	0.373118	0.918422	0.975151
SL000145	IL-1 sRII	0.151809	-0.000749884	0.304368	0.0511368	0.0931565	0.293669	0.163258	0.114655	-0.166203	0.395513	0.423642	0.737977
SL007250	PK3CG	0.14481	-0.000774728	0.290394	0.0512317	0	0.820889	0.163258	0.190023	-0.00367389	0.383719	0.0545066	0.236856
SL014248	SEM6B	-0.232506	-0.466642	0.0016306	0.051617	0.614175	0.107415	0.164049	-0.426806	-0.618769	-0.234844	1.31406e-05	0.00224329
SL005152	TIG2	0.171733	-0.0017811	0.345246	0.0523985	0.297603	0.232796	0.166091	-0.0901813	-0.281975	0.101612	0.356751	0.696596
SL014229	CD83	-0.143733	-0.289138	0.00167207	0.0526934	0	0.761145	0.166583	-0.129548	-0.323009	0.0639125	0.189364	0.501752
SL011073	XPNPEP1	0.143497	-0.00210745	0.289102	0.0534094	0.00809427	0.315344	0.168402	0.0886755	-0.143657	0.321008	0.454419	0.765302
SL004333	FGF-10	0.143935	-0.00236874	0.290239	0.0538264	0	0.789462	0.16927	0.16742	-0.0272678	0.362108	0.0919012	0.332794
SL000442	HGH	0.1425	-0.00265169	0.287652	0.0543347	0	0.670634	0.17042	0.183484	-0.00963438	0.376603	0.0625771	0.262385
SL005170	ICOS	0.165549	-0.00432069	0.335419	0.0561188	0.260522	0.244876	0.175555	0.19411	0.000202585	0.388018	0.0497611	0.226745
SL008416	MRC2	-0.176571	-0.358279	0.00513609	0.0568367	0.361395	0.210801	0.176861	-0.319615	-0.534035	-0.105195	0.00348316	0.0478435
SL004253	17-beta-HSD 1	0.250214	-0.00738447	0.507812	0.0569391	0.681142	0.0765723	0.176861	0.235986	-0.139186	0.611157	0.217639	0.54367
SL007471	COLEC12	-0.22274	-0.452092	0.00661167	0.0569802	0.59704	0.115182	0.176861	-0.00194127	-0.193695	0.189813	0.984169	0.994993
SL006921	PDK1	0.14145	-0.00431892	0.287218	0.0571852	0	0.873808	0.177037	0.195377	0.00148536	0.389268	0.0482706	0.221859
SL004765	MAPKAPK3	-0.192372	-0.391045	0.0063015	0.0577227	0.464705	0.17169	0.177683	0.0463468	-0.145435	0.238129	0.635748	0.853406
SL010529	UFC1	-0.139837	-0.284259	0.00458523	0.0577307	0	0.354436	0.177683	-0.11832	-0.310482	0.0738413	0.227503	0.553699
SL001890	GA733-1 protein	-0.141464	-0.2877	0.00477215	0.0579595	0	0.795572	0.177683	-0.104242	-0.298707	0.090223	0.293429	0.634082
SL017328	MYPC1	0.181762	-0.00615343	0.369678	0.0579887	0.39425	0.198844	0.177683	0.155134	-0.0388046	0.349072	0.116928	0.379697
SL003916	kallikrein 12	0.140608	-0.00497465	0.28619	0.0583591	0	0.493442	0.178361	0.169963	-0.0237206	0.363647	0.0854459	0.31915
SL006918	MK01	0.140861	-0.00517549	0.286897	0.0586907	0	0.893775	0.178917	0.237959	0.0438711	0.432047	0.0162617	0.116133
SL006919	RSK-like protein kinase	-0.139955	-0.285726	0.00581694	0.0598696	0	0.869732	0.182046	-0.176416	-0.370359	0.0175277	0.0746138	0.293301
SL007429	GPNMB	-0.139792	-0.285717	0.00613306	0.0604374	0	0.833557	0.183306	-0.198138	-0.392248	-0.00402721	0.0454326	0.216302
SL004458	Elafin	-0.138479	-0.283138	0.00617966	0.0606228	0	0.855359	0.183403	-0.181571	-0.557664	0.194522	0.344028	0.686418
SL004469	amyloid precursor protein	0.139438	-0.0063823	0.285258	0.0609057	0	0.518066	0.18363	0.148577	-0.0453928	0.342547	0.13328	0.413686
SL000338	Calpastatin	-0.178853	-0.365964	0.00825835	0.061005	0.394429	0.198777	0.18363	0.00635415	-0.237235	0.249944	0.959225	0.985153
SL000024	TF	-0.139253	-0.285038	0.00653239	0.0611871	0	0.667322	0.183715	-0.160345	-0.354321	0.0336304	0.105199	0.360208
SL003169	ENA-78	0.139342	-0.0068084	0.285493	0.0616702	0	0.855945	0.184702	0.0431362	-0.151158	0.237431	0.663461	0.866487
SL003080	MIF	0.138559	-0.00718426	0.284302	0.0624131	0	0.453009	0.186459	-0.0276333	-0.221034	0.165767	0.779446	0.921809
SL004269	ghrelin	-0.136594	-0.280529	0.00734123	0.0628858	0	0.508801	0.187403	0.081945	-0.10862	0.27251	0.399338	0.728711
SL001691	FGF7	-0.149575	-0.307341	0.00819186	0.0631413	0.144485	0.27963	0.187637	-0.190959	-0.384675	0.00275669	0.0533506	0.233531
SL012168	LIN7B	0.131564	-0.00727751	0.270406	0.0632783	0	0.41661	0.187637	0.0432271	-0.141299	0.227753	0.646132	0.859658
SL000546	PRL	0.13776	-0.00796714	0.283488	0.0639096	0	0.518138	0.188711	0.178761	-0.0151333	0.372656	0.0707637	0.282818
SL003193	6Ckine	0.137441	-0.00797433	0.282856	0.0639565	0	0.594758	0.188711	0.0738069	-0.119613	0.267227	0.454521	0.765302
SL004467	protein Z inhibitor	0.21577	-0.0128363	0.444377	0.0643262	0.597156	0.11513	0.189106	0.056917	-0.134869	0.248703	0.560792	0.818177
SL000088	TGF-b2	0.129172	-0.00780162	0.266146	0.0645546	0	0.881679	0.189106	0.0378137	-0.14422	0.219847	0.683904	0.877836
SL003735	4-1BB ligand	-0.137876	-0.284086	0.00833308	0.0645651	0	0.902667	0.189106	-0.094287	-0.288808	0.100234	0.342101	0.686418
SL008157	UB2L3	-0.137449	-0.283484	0.00858612	0.0650771	0	0.484775	0.18984	-0.132623	-0.326964	0.0617183	0.181051	0.495095
SL005202	MSP	-0.136616	-0.281797	0.00856459	0.0651335	0	0.796775	0.18984	-0.130201	-0.323394	0.0629916	0.186533	0.50033
SL004698	HPV E7 Type18	0.136644	-0.00867773	0.281965	0.0653397	0	0.391099	0.189978	0.15922	-0.0341586	0.352599	0.106581	0.363897
SL004330	CD22	0.136531	-0.00914096	0.282202	0.0662135	0	0.863696	0.191603	0.0742444	-0.119516	0.268005	0.452647	0.765302
SL004477	calgranulin B	-0.136144	-0.281405	0.00911806	0.0662191	0	0.601057	0.191603	-0.198174	-0.39128	-0.00506858	0.0442823	0.215111
SL004146	IL-1 R4	-0.228017	-0.472021	0.0159862	0.0670179	0.648543	0.0916416	0.193445	-0.160842	-0.486488	0.164804	0.333015	0.674496
SL004652	WIF-1	-0.185766	-0.384684	0.013152	0.0671937	0.507174	0.15431	0.193486	0.0351455	-0.216383	0.286674	0.784191	0.921809
SL008904	LYVE1	0.13613	-0.00977508	0.282035	0.0674514	0	0.544852	0.193596	-0.00551098	-0.199243	0.188221	0.955538	0.984369
SL004866	Carbonic anhydrase I	-0.135828	-0.281464	0.00980892	0.0675561	0	0.325702	0.193596	-0.148543	-0.342339	0.0452523	0.133019	0.413686
SL000017	vWF	-0.134988	-0.280297	0.0103198	0.0686422	0	0.462445	0.195523	-0.232298	-0.527856	0.0632606	0.123449	0.394442
SL004676	IGFBP-5	-0.231271	-0.480266	0.0177234	0.0686899	0.659736	0.0864699	0.195523	0.0276922	-0.272531	0.327915	0.856537	0.954815
SL005212	Prolactin Receptor	0.135263	-0.0103948	0.280921	0.0687449	0	0.840081	0.195523	0.199715	0.00605339	0.393377	0.0432562	0.212721
SL005209	Notch-3	-0.134704	-0.279832	0.0104241	0.0688832	0	0.898575	0.195523	-0.285663	-0.478341	-0.0929853	0.00366276	0.0491798
SL016129	FAM107B	0.266845	-0.0212996	0.554989	0.0695111	0.754573	0.0435342	0.196838	0.0419163	-0.184773	0.268605	0.717045	0.897047
SL010514	PTK6	0.134133	-0.0111826	0.279448	0.0704298	0	0.804868	0.198807	0.142293	-0.0509973	0.335584	0.149062	0.445052
SL000485	IL-9	-0.133543	-0.278275	0.0111897	0.070539	0	0.722527	0.198807	-0.101886	-0.294461	0.0906887	0.299753	0.634831
SL003183	IP-10	-0.13325	-0.277825	0.0113254	0.0708514	0	0.817835	0.199217	-0.432753	-0.623355	-0.242151	8.58672e-06	0.00208611
SL003951	BDNF	-0.134031	-0.279727	0.0116647	0.0713811	0	0.541062	0.200236	-0.0263463	-0.338076	0.285383	0.868433	0.955746
SL000305	b-NGF	0.178042	-0.0158789	0.371964	0.0719435	0.434918	0.183425	0.201341	0.115973	-0.135545	0.367491	0.36614	0.704413
SL004815	14-3-3 protein beta/alpha	-0.133646	-0.279401	0.0121099	0.0723161	0	0.637987	0.201911	-0.112191	-0.306054	0.0816726	0.256689	0.580953
SL006550	ECM1	0.142501	-0.0132311	0.298234	0.0729018	0.136575	0.281844	0.202954	0.162793	-0.0295552	0.355142	0.0971547	0.345036
SL005392	Arylsulfatase A	0.17244	-0.0160948	0.360974	0.0730296	0.404348	0.19508	0.202954	0.230231	0.0372864	0.423176	0.0193496	0.127338
SL004128	Activin RIB	0.13333	-0.0125838	0.279245	0.0733038	0	0.880895	0.203244	0.224083	0.0300868	0.418079	0.0235782	0.14088
SL003792	GRB2 adapter protein	-0.132212	-0.277212	0.0127871	0.073918	0	0.683298	0.204472	-0.0109049	-0.203564	0.181754	0.911666	0.975151
SL004751	HO-2	0.131245	-0.0130455	0.275536	0.0746252	0	0.950491	0.205952	-0.0244278	-0.215901	0.167046	0.802551	0.928154
SL005181	IL-20 Ra	-0.132114	-0.277513	0.0132842	0.0749299	0	0.688359	0.206316	-0.13696	-0.330181	0.0562607	0.164749	0.467259
SL011629	AIP	0.131653	-0.0139763	0.277283	0.0764172	0	0.833	0.209928	0.211469	-0.148053	0.570992	0.248976	0.572166
SL005846	Moesin	0.131307	-0.0143097	0.276923	0.0771682	0	0.898608	0.211211	0.0742358	-0.11935	0.267821	0.45229	0.765302
SL004070	Ubiquitin	-0.131329	-0.277005	0.0143465	0.077238	0	0.688129	0.211211	-0.193742	-0.387402	-8.22229e-05	0.0499028	0.226745
SL000541	Plasminogen	0.130908	-0.0145119	0.276329	0.0776691	0	0.603814	0.211905	0.272648	0.0609858	0.484311	0.0115802	0.0931908
SL003300	HCC-4	0.130411	-0.0153141	0.276136	0.0794317	0	0.514071	0.216221	-0.0306271	-0.22404	0.162785	0.756285	0.913812
SL003184	sLeptin R	-0.129271	-0.273817	0.0152745	0.0796277	0	0.365451	0.216262	0.0420484	-0.149687	0.233784	0.667321	0.866792
SL005352	FABPE	0.157178	-0.019299	0.333655	0.0808757	0.311698	0.228071	0.218974	0.19577	0.00149459	0.390046	0.0482634	0.221859
SL000448	HSP 27	-0.129725	-0.275434	0.0159844	0.0809928	0	0.92125	0.218974	-0.0476754	-0.241318	0.145967	0.629416	0.851081
SL001943	IL-6 sRa	-0.127572	-0.273017	0.0178727	0.085593	0	0.560455	0.230543	-0.2127	-0.406072	-0.0193273	0.0310946	0.167379
SL006268	NSF1C	-0.123706	-0.264771	0.0173602	0.0856578	0	0.570101	0.230543	-0.0227577	-0.210196	0.164681	0.811907	0.928154
SL006705	PFD5	-0.126506	-0.27241	0.0193975	0.0892453	0	0.602551	0.239659	-0.180544	-0.374647	0.0135592	0.0682959	0.276119
SL005177	IL-1F6	0.125971	-0.0198033	0.271744	0.0903216	0	0.923465	0.241883	-0.061416	-0.279206	0.156374	0.580467	0.819684
SL002539	OPG	-0.125369	-0.270517	0.0197794	0.0904784	0	0.717847	0.241883	-0.103305	-0.296425	0.0898156	0.294439	0.634728
SL003461	ACTH	0.124364	-0.0201054	0.268833	0.0915648	0	0.541962	0.244241	0.183426	-0.0589083	0.42576	0.137936	0.418359
SL010372	Enterokinase	0.124754	-0.0203472	0.269855	0.0919649	0	0.402629	0.244762	0.0664678	-0.126412	0.259348	0.499411	0.786293
SL007136	CEBPB	0.137032	-0.0228346	0.296898	0.0929551	0.16385	0.274131	0.246847	0.0475263	-0.146531	0.241584	0.631219	0.851363
SL008835	ASGR1	0.124296	-0.0212169	0.269809	0.094094	0	0.881831	0.249318	0.00672465	-0.186632	0.200081	0.945655	0.976441
SL000021	Insulin	0.290785	-0.0513777	0.632948	0.0957803	0.820077	0.018397	0.252942	-0.175123	-0.584031	0.233785	0.401248	0.728711
SL007173	GRN	-0.123182	-0.268239	0.0218755	0.0960345	0	0.56214	0.252942	-0.122753	-0.398668	0.153161	0.383219	0.71678
SL007195	CD70	0.123726	-0.0220189	0.269472	0.0961412	0	0.647124	0.252942	0.150888	-0.0430281	0.344804	0.127242	0.402261
SL009868	SSRP1	0.155924	-0.0279917	0.33984	0.0965808	0.370918	0.207381	0.252942	0.0540933	-0.213106	0.321292	0.691525	0.879264
SL007056	BMP10	0.121862	-0.021938	0.265662	0.0967228	0	0.572542	0.252942	-0.0797832	-0.270343	0.110776	0.411876	0.736453
SL003197	TECK	0.170244	-0.0306533	0.371141	0.0967317	0.477909	0.166368	0.252942	-0.02928	-0.221155	0.162595	0.764871	0.916771
SL017189	Kininogen, HMW	0.122814	-0.022334	0.267963	0.09724	0	0.988638	0.253716	0.213007	0.0200198	0.405993	0.0305193	0.165025
SL005206	NKp44	0.172934	-0.0315866	0.377455	0.0974663	0.49138	0.160862	0.253752	0.115325	-0.0892553	0.319905	0.26922	0.595774
SL017188	GSK-3 alpha/beta	0.122374	-0.022615	0.267363	0.098076	0	0.408998	0.254784	0.0790961	-0.113743	0.271935	0.421449	0.737365
SL003104	Eotaxin-2	0.122609	-0.0236084	0.268826	0.100278	0	0.40622	0.259771	0.0591044	-0.135399	0.253608	0.551456	0.818177
SL003440	PAFAH	0.126139	-0.0243554	0.276633	0.10043	0.0638294	0.301357	0.259771	0.196654	-0.0107591	0.404067	0.0631271	0.263358
SL014488	VAV	-0.129003	-0.283457	0.0254518	0.101632	0.11326	0.288261	0.262141	-0.00118106	-0.194233	0.191871	0.990433	0.997548
SL005223	TCCR	0.182026	-0.0360107	0.400063	0.101785	0.555356	0.133702	0.262141	-0.0725358	-0.371966	0.226895	0.634935	0.853406
SL000566	RBP	-0.121524	-0.267242	0.0241954	0.102148	0	0.682751	0.262509	0.054775	-0.138523	0.248073	0.578624	0.819684
SL004768	AIF1	0.121183	-0.0244552	0.266821	0.102922	0	0.787216	0.262977	0.173842	-0.0198515	0.367536	0.0785624	0.303825
SL007674	LY9	-0.120428	-0.26524	0.0243839	0.103115	0	0.944018	0.262977	-0.303412	-0.495449	-0.111375	0.00195706	0.0354347
SL008039	AK1A1	0.194035	-0.0393339	0.427404	0.103183	0.610411	0.109128	0.262977	0.0409296	-0.272501	0.35436	0.797995	0.928154
SL005214	Semaphorin-6A	-0.123773	-0.272648	0.0251025	0.10321	0.0450013	0.306171	0.262977	-0.142271	-0.384013	0.099472	0.248713	0.572166
SL005372	Sorting nexin 4	-0.120982	-0.266749	0.0247844	0.103797	0	0.921404	0.26391	-0.0215018	-0.215262	0.172259	0.827819	0.932981
SL003201	VEGF sR2	0.120123	-0.0255829	0.265829	0.10613	0	0.349356	0.268809	0.261748	0.0682655	0.455231	0.00801381	0.076612
SL009948	PLXB2	-0.119059	-0.263493	0.0253745	0.106174	0	0.680785	0.268809	-0.305867	-0.497345	-0.11439	0.00174295	0.0335939
SL004557	CD59	-0.165646	-0.367912	0.0366211	0.108471	0.47907	0.165896	0.274043	-0.211726	-0.578563	0.15511	0.257959	0.581625
SL003739	DcR3	0.118018	-0.027977	0.264012	0.113108	0	0.427036	0.285157	0.132072	-0.0622023	0.326347	0.18272	0.497381
SL014092	CDON	0.117389	-0.028019	0.262797	0.113582	0	0.88807	0.285392	0.223762	0.0265138	0.421011	0.0261876	0.152654
SL003331	MMP-16	-0.118141	-0.26452	0.0282378	0.113679	0	0.644403	0.285392	-0.0692189	-0.263888	0.125451	0.485861	0.77841
SL001938	Activin A	0.11609	-0.0285346	0.260715	0.115658	0	0.336975	0.289752	-0.203775	-0.393787	-0.0137628	0.0355597	0.18553
SL008504	GNS	-0.117158	-0.263297	0.0289808	0.116117	0	0.876549	0.289934	-0.115921	-0.310375	0.0785328	0.242643	0.570886
SL008402	LYPD3	0.193433	-0.047952	0.434819	0.116273	0.634638	0.0980482	0.289934	0.275246	0.0738171	0.476674	0.00740129	0.0743239
SL002565	c-Myc	0.128878	-0.0320307	0.289787	0.116459	0.176622	0.270441	0.289934	0.174874	-0.0191015	0.368849	0.0772351	0.299662
SL010462	FCN1	0.116088	-0.0291124	0.261289	0.117116	0	0.819332	0.290963	0.0272567	-0.165802	0.220315	0.781999	0.921809
SL005205	NKp30	-0.116572	-0.262553	0.0294095	0.117558	0	0.522886	0.291455	-0.197185	-0.391279	-0.00309019	0.0464623	0.218593
SL006970	DLL1	-0.114451	-0.25863	0.0297277	0.119745	0	0.333668	0.296263	-0.121662	-0.313505	0.0701809	0.213882	0.536955
SL000074	p53	0.115534	-0.0303471	0.261414	0.120605	0	0.595524	0.297775	0.282368	0.0887827	0.475954	0.00425182	0.0552274
SL000325	C9	-0.11487	-0.260461	0.0307214	0.122011	0	0.626309	0.300625	-0.26034	-0.453665	-0.0670144	0.00830609	0.0775452
SL018938	SUMO3	-0.114216	-0.259308	0.0308758	0.12286	0	0.836283	0.301966	-0.063293	-0.256253	0.129667	0.520295	0.802709
SL000674	FST	0.114574	-0.0311302	0.260278	0.123266	0	0.415778	0.301966	0.0686516	-0.125034	0.262337	0.487239	0.77841
SL003182	Integrin aVb5	-0.133421	-0.303114	0.0362727	0.123313	0.254763	0.246707	0.301966	-0.0860801	-0.341602	0.169442	0.509079	0.794915
SL007502	ST4S6	-0.114058	-0.259321	0.0312046	0.12382	0	0.505676	0.302587	-0.114535	-0.307802	0.0787312	0.245426	0.571704
SL006108	CD5L	-0.114229	-0.259917	0.0314593	0.124358	0	0.863727	0.302788	-0.152653	-0.346412	0.041105	0.122548	0.393544
SL017614	PKB a/b/g	0.113991	-0.0314213	0.259404	0.124429	0	0.634835	0.302788	0.115167	-0.0783328	0.308667	0.2434	0.570886
SL014111	KIRR3	-0.131311	-0.298946	0.0363239	0.124717	0.23708	0.252258	0.302788	-0.0833183	-0.277759	0.111122	0.400992	0.728711
SL003308	IL-4 sR	0.135281	-0.0376087	0.30817	0.125125	0.297179	0.232937	0.302788	0.211173	0.0187002	0.403645	0.0315244	0.168177
SL004820	Phosphoglycerate mutase 1	0.113965	-0.0316998	0.259629	0.125169	0	0.422666	0.302788	0.111696	-0.243539	0.466932	0.537717	0.813243
SL000251	a2-HS-Glycoprotein	0.151513	-0.043801	0.346827	0.128405	0.442382	0.180519	0.309987	0.289768	-0.319345	0.898881	0.351132	0.693173
SL004148	IL-12 Rb1	0.113212	-0.0328831	0.259308	0.128809	0	0.642528	0.310336	0.0693667	-0.125	0.263733	0.484249	0.77841
SL007153	PERL	-0.111375	-0.256076	0.0333263	0.131411	0	0.410685	0.315968	-0.0989613	-0.291511	0.0935883	0.313777	0.65168
SL009792	PUR8	-0.111831	-0.25731	0.0336473	0.1319	0	0.495402	0.316508	-0.0764676	-0.270031	0.117096	0.438761	0.751175
SL008956	ARSB	0.111303	-0.0339505	0.256556	0.133135	0	0.963998	0.31806	0.296417	0.1039	0.488934	0.00254666	0.0385222
SL008486	LEG9	0.111056	-0.0339934	0.256105	0.133451	0	0.856858	0.31806	-0.025174	-0.217805	0.167457	0.797844	0.928154
SL005403	Lectin, mannose-binding 2	0.11137	-0.0341131	0.256853	0.133514	0	0.424805	0.31806	0.274732	0.0816602	0.467803	0.00528814	0.0601841
SL000437	Haptoglobin, Mixed Type	0.111373	-0.0341846	0.256931	0.133702	0	0.995739	0.31806	0.0645612	-0.12909	0.258213	0.513479	0.798062
SL003280	HMG-1	0.110913	-0.034109	0.255935	0.133878	0	0.845541	0.31806	0.174909	-0.0179836	0.367801	0.0755298	0.294975
SL010328	MED-1	-0.110789	-0.25585	0.0342709	0.134415	0	0.914267	0.318702	-0.0361974	-0.229107	0.156712	0.713048	0.895131
SL006910	Cathepsin V	0.110924	-0.0348573	0.256705	0.135877	0	0.773833	0.321531	0.296877	0.0018801	0.591874	0.0485576	0.222323
SL011202	SNAA	-0.13032	-0.301973	0.0413325	0.136745	0.277449	0.239423	0.32283	-0.0656265	-0.296934	0.165681	0.578156	0.819684
SL004354	IL-19	0.109922	-0.0349447	0.254789	0.136967	0	0.929072	0.32283	0.0683045	-0.124298	0.260907	0.487004	0.77841
SL004335	FGF-17	0.133816	-0.0426617	0.310293	0.137236	0.311048	0.228291	0.32283	0.164246	-0.0300726	0.358565	0.0975918	0.345036
SL005159	EPO-R	0.116837	-0.0374891	0.271162	0.13785	0.100012	0.291837	0.32304	0.109868	-0.0845497	0.304285	0.268035	0.595356
SL004932	Peroxiredoxin-5	0.152665	-0.0489939	0.354324	0.137867	0.475699	0.167263	0.32304	0.249217	0.0556532	0.44278	0.0116196	0.0931908
SL004823	Cyclophilin A	-0.10907	-0.254153	0.0360143	0.140632	0	0.55882	0.328876	-0.0566251	-0.249629	0.136378	0.56527	0.819308
SL020172	RXFP1	0.109836	-0.036437	0.256109	0.141094	0	0.885522	0.32931	0.231922	0.0377484	0.426096	0.0192327	0.127338
SL004925	AGR2	0.109616	-0.0365198	0.255753	0.141517	0	0.845406	0.329655	0.173336	-0.020959	0.36763	0.0803709	0.308821
SL011533	SGTA	-0.109016	-0.254951	0.0369202	0.143163	0	0.952488	0.332527	0.0183841	-0.175502	0.212271	0.852569	0.952168
SL000563	RANTES	0.200331	-0.0680167	0.468679	0.143417	0.709969	0.0633321	0.332527	0.124168	-0.0672058	0.315542	0.20349	0.52827
SL000384	CTLA-4	0.159476	-0.0542714	0.373224	0.143653	0.5374	0.141488	0.332527	0.0189486	-0.387784	0.425682	0.927247	0.975151
SL004066	GIIE	0.10903	-0.0371807	0.255241	0.143863	0	0.456176	0.332527	0.154595	-0.185206	0.494395	0.372554	0.707825
SL000521	MMP-1	-0.148768	-0.348709	0.0511732	0.14475	0.46725	0.170669	0.333293	0.0263922	-0.2732	0.325984	0.862918	0.955746
SL010830	41	-0.108183	-0.253579	0.0372135	0.144752	0	0.86478	0.333293	-0.061192	-0.322928	0.200544	0.64679	0.859658
SL003849	FGF9	0.108687	-0.0375258	0.254899	0.145135	0	0.889039	0.33353	0.0556809	-0.138811	0.250173	0.574719	0.819684
SL004851	ALK-1	0.108219	-0.038086	0.254524	0.147129	0	0.886857	0.337207	0.0260878	-0.168479	0.220654	0.792708	0.925989
SL006913	FYN	-0.107225	-0.252247	0.0377971	0.147299	0	0.344915	0.337207	0.0361263	-0.156447	0.2287	0.713109	0.895131
SL004151	IL-15 Ra	-0.107862	-0.254077	0.0383531	0.148218	0	0.970239	0.338663	-0.143946	-0.369817	0.0819256	0.211641	0.534695
SL000323	C7	-0.164993	-0.388913	0.0589278	0.148691	0.576061	0.124576	0.339094	-0.149322	-0.376444	0.0777996	0.197542	0.517681
SL005193	JAM-B	0.106902	-0.0385822	0.252386	0.149815	0	0.613518	0.341008	0.121668	-0.0718801	0.315216	0.217923	0.54367
SL005160	ESAM	-0.20373	-0.482012	0.0745518	0.151319	0.726751	0.0557448	0.343775	-0.0547555	-0.352604	0.243093	0.718613	0.897328
SL004081	Bone proteoglycan II	-0.106234	-0.251559	0.0390902	0.151926	0	0.844209	0.3445	-0.256108	-0.449021	-0.0631949	0.00926785	0.0832713
SL000011	AFP	-0.106012	-0.251248	0.0392251	0.152538	0	0.683866	0.344901	-0.102276	-0.295539	0.090987	0.299631	0.634831
SL007266	PSD7	-0.243732	-0.577761	0.0902979	0.15268	0.808148	0.0224269	0.344901	-0.231152	-0.751442	0.289138	0.383882	0.71678
SL004009	RAC1	-0.105971	-0.251367	0.0394247	0.153145	0	0.796406	0.345298	0.0312553	-0.161842	0.224353	0.751058	0.911182
SL000468	IgM	-0.129165	-0.306813	0.0484836	0.154142	0.331463	0.221318	0.346892	-0.0301769	-0.242331	0.181978	0.780409	0.921809
SL000587	Thyroglobulin	0.201463	-0.0764213	0.479347	0.155331	0.751831	0.0447107	0.348911	0.149377	-0.0935015	0.392255	0.228037	0.55387
SL004008	Proteinase-3	-0.133246	-0.317397	0.0509041	0.156139	0.375702	0.205648	0.350067	-0.206306	-0.399391	-0.0132201	0.0362459	0.186698
SL019019	PIANP	-0.262805	-0.62685	0.10124	0.157097	0.841482	0.0120165	0.351557	-0.161637	-0.37363	0.0503567	0.135072	0.416008
SL009207	Dynactin subunit 2	-0.105385	-0.251619	0.0408496	0.157815	0	0.467435	0.352502	-0.175672	-0.453211	0.101867	0.21476	0.538025
SL005361	Apo D	0.14701	-0.0571914	0.351211	0.158236	0.494676	0.159503	0.352783	0.161489	-0.0310717	0.354049	0.100238	0.350245
SL005204	NKG2D	0.10478	-0.0415637	0.251124	0.160526	0	0.438882	0.356658	0.00695423	-0.187511	0.20142	0.944122	0.976441
SL003863	kallikrein 5	-0.110523	-0.264904	0.0438584	0.160571	0.105921	0.290248	0.356658	-0.00304669	-0.196772	0.190679	0.97541	0.993704
SL008059	RS3	0.103653	-0.0412946	0.2486	0.16104	0	0.743442	0.357037	0.134165	-0.0586977	0.327029	0.17274	0.480858
SL000527	MMP-9	0.10352	-0.041881	0.248922	0.162889	0	0.323895	0.360467	0.00514524	-0.187819	0.198109	0.958321	0.985153
SL004153	M-CSF R	0.194222	-0.0788024	0.467247	0.163238	0.713331	0.0618023	0.360571	-0.0988975	-0.558029	0.360234	0.672894	0.868857
SL004336	FGF-18	0.103769	-0.0424733	0.250011	0.164307	0	0.632811	0.362195	0.0324172	-0.162078	0.226912	0.743914	0.908078
SL005178	IL-1F7	0.102668	-0.0421156	0.247451	0.164579	0	0.813674	0.362195	0.16617	-0.0264167	0.358756	0.0908141	0.330262
SL006372	YES	0.14593	-0.0607	0.35256	0.166297	0.500964	0.156899	0.36437	0.0548589	-0.138425	0.248142	0.578014	0.819684
SL007217	INGR2	0.103209	-0.0429464	0.249365	0.166344	0	0.501647	0.36437	0.0369637	-0.157427	0.231354	0.709379	0.895069
SL011809	XTP3A	-0.102774	-0.248395	0.0428458	0.166578	0	0.929515	0.36437	-0.162701	-0.404367	0.0789656	0.18699	0.50033
SL010503	MAPK2	0.101553	-0.0424075	0.245513	0.166787	0	0.441348	0.36437	0.162302	-0.0291843	0.353788	0.0966638	0.345036
SL008008	ARGI1	-0.102405	-0.248414	0.0436026	0.169238	0	0.681941	0.369049	-0.204111	-0.398172	-0.0100505	0.0392581	0.197947
SL000601	Transferrin	-0.101627	-0.247831	0.0445772	0.173079	0	0.853701	0.375408	0.00352968	-0.251736	0.258796	0.978379	0.994823
SL004136	Dtk	-0.101511	-0.24758	0.0445571	0.173169	0	0.661838	0.375408	-0.0876894	-0.281982	0.106604	0.376383	0.710549
SL004063	FGFR-3	0.101263	-0.0445973	0.247123	0.173609	0	0.410441	0.375408	0.0309136	-0.163095	0.224923	0.75481	0.912954
SL000360	Coagulation Factor X	0.100309	-0.0442234	0.244842	0.173746	0	0.518166	0.375408	0.297318	0.105765	0.48887	0.00234894	0.0385222
SL003793	MEK1	0.101571	-0.0448113	0.247954	0.173839	0	0.518858	0.375408	0.0202731	-0.381191	0.421737	0.921159	0.975151
SL003332	MMP-17	0.101338	-0.044776	0.247452	0.174039	0	0.754086	0.375408	0.0673839	-0.127024	0.261792	0.496919	0.784315
SL010509	PAK6	0.10084	-0.0448464	0.246527	0.174898	0	0.333423	0.376582	-0.0876259	-0.280713	0.105461	0.373755	0.707825
SL011709	PLPP	-0.100875	-0.246942	0.0451907	0.17587	0	0.611675	0.377995	-0.193732	-0.387913	0.000449742	0.050533	0.228738
SL012881	GPC6	0.0998136	-0.0455941	0.245221	0.178497	0	0.461317	0.382872	0.218893	0.0257715	0.412014	0.026316	0.152659
SL004350	IL-17B	0.0993982	-0.0454988	0.244295	0.17878	0	0.720851	0.382872	0.137041	-0.0557284	0.329811	0.163513	0.467259
SL004938	CaMKK alpha	0.100002	-0.0461766	0.24618	0.179977	0	0.790048	0.384476	0.000866756	-0.19346	0.195194	0.993025	0.997548
SL004673	Cathepsin S	-0.0992037	-0.244281	0.0458734	0.180173	0	0.602099	0.384476	-0.252037	-0.444637	-0.0594373	0.010323	0.0879286
SL007651	FGF23	0.0986749	-0.0461669	0.243517	0.181796	0	0.923547	0.387249	0.132094	-0.0606029	0.324791	0.179091	0.491986
SL014308	FGF-8A	-0.0991818	-0.244953	0.0465897	0.182353	0	0.545637	0.387458	-0.192209	-0.386008	0.00159	0.0519095	0.23129
SL007179	EPHB2	-0.0991463	-0.244929	0.0466363	0.182543	0	0.361783	0.387458	-0.191308	-0.384874	0.00225825	0.0527334	0.233394
SL012783	WFKN1	0.171782	-0.0813282	0.424893	0.183453	0.668616	0.0823627	0.388699	0.0704197	-0.121932	0.262771	0.473041	0.777822
SL000507	Lymphotoxin a1/b2	0.196777	-0.0939775	0.487532	0.184685	0.748541	0.0461312	0.39003	-0.00255595	-0.426746	0.421634	0.990577	0.997548
SL006544	BGH3	-0.0982874	-0.243531	0.0469565	0.184734	0	0.899957	0.39003	-0.243359	-0.448372	-0.0383454	0.0199891	0.127738
SL004156	TRAIL R1	0.098333	-0.0478029	0.244469	0.187224	0	0.567223	0.394085	0.0624516	-0.131991	0.256894	0.529018	0.806348
SL002086	Ficolin-3	0.114766	-0.0558264	0.285359	0.187314	0.264827	0.243499	0.394085	0.177796	-0.201076	0.556667	0.357695	0.697301
SL008190	SPTA2	0.0977495	-0.0481465	0.243645	0.189127	0	0.729569	0.396948	0.0641636	-0.129892	0.258219	0.516951	0.800203
SL011808	CPNE1	0.108117	-0.0533301	0.269563	0.189339	0.180024	0.269449	0.396948	0.110059	-0.0841343	0.304253	0.26665	0.594489
SL003703	BFL1	-0.104952	-0.261928	0.052024	0.190059	0.148409	0.278525	0.397758	0.18847	-0.096615	0.473554	0.195067	0.51232
SL000493	LDH-H 1	-0.102193	-0.255441	0.051055	0.191214	0.098745	0.292177	0.398395	-0.10335	-0.296695	0.0899951	0.29479	0.634728
SL010454	Contactin-4	-0.0970695	-0.242663	0.0485238	0.191301	0	0.522301	0.398395	-0.0276559	-0.2213	0.165988	0.77954	0.921809
SL006698	transcription factor MLR1, isoform CRA_b	0.104211	-0.0521906	0.260614	0.191575	0.138394	0.281336	0.398395	0.00426978	-0.19346	0.202	0.966241	0.986044
SL006992	MATN3	0.0972888	-0.0487634	0.243341	0.191696	0	0.707061	0.398395	0.05796	-0.13636	0.25228	0.558816	0.818177
SL005250	Chymase	0.0967209	-0.0487588	0.242201	0.192553	0	0.830108	0.39932	0.0654937	-0.228744	0.359731	0.662645	0.866487
SL000668	CD36 ANTIGEN	0.166367	-0.0840136	0.416749	0.19281	0.660787	0.0859839	0.39932	-0.385511	-0.572933	-0.198088	5.54292e-05	0.00443924
SL007070	LDLR	0.181501	-0.0941537	0.457155	0.196874	0.718195	0.0595972	0.406663	0.245733	-0.0958757	0.587342	0.158575	0.459943
SL010491	CAMK2A	0.0951873	-0.0494378	0.239813	0.197057	0	0.498257	0.406663	0.0699907	-0.122432	0.262413	0.475904	0.777822
SL000592	TIMP-2	-0.109133	-0.275125	0.0568594	0.19754	0.231203	0.254079	0.406663	-0.186617	-0.379807	0.00657407	0.0583222	0.249803
SL003990	FGFR-2	0.0958872	-0.0500159	0.24179	0.197717	0	0.605447	0.406663	0.109547	-0.0846095	0.303704	0.26879	0.595774
SL000523	MMP-13	0.117066	-0.0616812	0.295813	0.199272	0.402858	0.195638	0.408907	0.187438	0.00388729	0.370989	0.0453415	0.216302
SL004342	FGF-8B	0.0956482	-0.0505216	0.241818	0.199657	0	0.47723	0.408907	-0.0179265	-0.285022	0.249169	0.895344	0.96916
SL005207	NKp46	-0.0953308	-0.241076	0.0504141	0.199843	0	0.514855	0.408907	-0.107296	-0.30124	0.0866483	0.278226	0.611177
SL002722	CD38	0.0945264	-0.0500958	0.239149	0.200176	0	0.534146	0.408907	0.0344702	-0.24091	0.309851	0.806197	0.928154
SL005725	GRB2-related adapter protein 2	0.0952729	-0.0511608	0.241707	0.20224	0	0.867236	0.411514	0.129952	-0.0647639	0.324668	0.190851	0.504339
SL014091	SORC2	0.0950573	-0.0510719	0.241186	0.202323	0	0.334996	0.411514	0.0293937	-0.167756	0.226544	0.770121	0.919375
SL006476	NMT1	0.093103	-0.0500733	0.236279	0.202486	0	0.427402	0.411514	0.10882	-0.0816877	0.299327	0.262905	0.58944
SL004296	Myokinase, human	-0.0942268	-0.239409	0.0509555	0.203351	0	0.540967	0.41257	-0.0713316	-0.264526	0.121863	0.469274	0.774562
SL016828	EGFRvIII	0.11041	-0.0599284	0.280747	0.203939	0.259125	0.245321	0.413063	0.0951908	-0.161502	0.351883	0.467333	0.773494
SL004899	HSP70 protein 8	0.094037	-0.0517654	0.239839	0.206193	0	0.774905	0.416922	-0.0241202	-0.217629	0.169389	0.806997	0.928154
SL003728	cIAP-2	0.113503	-0.0626178	0.289624	0.206546	0.316847	0.226326	0.41693	0.102994	-0.13102	0.337007	0.388348	0.720622
SL000398	Cytochrome P450 3A4	0.0938557	-0.052213	0.239924	0.207898	0	0.416513	0.418952	0.155835	-0.0384726	0.350144	0.115975	0.379347
SL001791	Osteocalcin	0.0924153	-0.0517019	0.236533	0.208816	0	0.66533	0.420092	0.113257	-0.0781863	0.3047	0.24625	0.572166
SL004829	S100A7	0.0924238	-0.0520894	0.236937	0.210024	0	0.407258	0.421812	-0.0708355	-0.262421	0.12075	0.468658	0.774562
SL006923	TBP	0.093314	-0.0529509	0.239579	0.211147	0	0.31744	0.423358	0.0864848	-0.108019	0.280989	0.383491	0.71678
SL003171	FGF-4	0.0928002	-0.0536073	0.239208	0.214118	0	0.454378	0.428596	0.0648973	-0.185016	0.31481	0.610778	0.841912
SL000306	BNP-32	0.0920733	-0.0534504	0.237597	0.214948	0	0.572526	0.428836	0.0793366	-0.114307	0.27298	0.42197	0.737365
SL009324	FSTL3	-0.091116	-0.235346	0.0531137	0.215645	0	0.508124	0.428836	-0.553291	-0.740755	-0.365827	7.2628e-09	8.67905e-06
SL004692	CLF-1/CLC Complex	0.0924797	-0.0539176	0.238877	0.215673	0	0.754487	0.428836	0.0899982	-0.104614	0.28461	0.364732	0.704128
SL004920	Cofilin-1	0.0918757	-0.0535658	0.237317	0.215674	0	0.467354	0.428836	0.23069	0.0375529	0.423828	0.0192295	0.127338
SL017611	14-3-3	0.0917912	-0.053791	0.237373	0.216541	0	0.468164	0.429844	0.0630894	-0.130619	0.256798	0.523248	0.804738
SL005575	Fucosyltransferase 3	-0.0918492	-0.23784	0.054142	0.21754	0	0.980079	0.43056	-0.0665693	-0.260762	0.127624	0.501664	0.788695
SL018947	UBP25	0.0919146	-0.0542065	0.238036	0.217622	0	0.752803	0.43056	0.107107	-0.087328	0.301542	0.280289	0.614272
SL009202	JAML1	0.090769	-0.0540931	0.235631	0.219412	0	0.606414	0.433385	0.170822	-0.021813	0.363458	0.0822059	0.312854
SL007003	DHH	-0.0914235	-0.237563	0.0547158	0.220147	0	0.529521	0.433925	-0.0747526	-0.26922	0.119715	0.451208	0.765302
SL004352	IL-17F	-0.0913333	-0.237412	0.0547457	0.220412	0	0.716106	0.433925	-0.231658	-0.425544	-0.0377712	0.0191917	0.127338
SL001729	G-CSF	-0.0910077	-0.237256	0.055241	0.222599	0	0.567444	0.436333	-0.163148	-0.43279	0.106493	0.235666	0.559883
SL006915	IL-27	-0.0910168	-0.237307	0.055274	0.222686	0	0.337515	0.436333	-0.118637	-0.31322	0.0759468	0.232094	0.557524
SL004131	B7-2	-0.0894043	-0.233117	0.0543087	0.22273	0	0.591696	0.436333	-0.0088277	-0.199929	0.182273	0.927859	0.975151
SL004648	LIGHT	-0.0903212	-0.235888	0.0552453	0.223939	0	0.654799	0.437894	-0.179247	-0.372706	0.0142107	0.0693715	0.279121
SL003199	sTie-1	0.0902216	-0.0552852	0.235728	0.22426	0	0.620676	0.437894	-0.149283	-0.39484	0.0962729	0.233442	0.557926
SL000586	Thrombin	-0.0898421	-0.235122	0.0554383	0.225493	0	0.732091	0.439246	0.120926	-0.0987659	0.340617	0.280663	0.614272
SL003310	VEGF121	0.144735	-0.089563	0.379034	0.225992	0.61198	0.108414	0.439246	-0.0235271	-0.216029	0.168975	0.810685	0.928154
SL010504	MAPK5	0.090319	-0.0559098	0.236548	0.226056	0	0.804267	0.439246	0.0966896	-0.0978216	0.291201	0.329918	0.669358
SL016148	C34 gp41 HIV Fragment	-0.0894112	-0.234304	0.055482	0.226485	0	0.633183	0.439367	-0.0250363	-0.217763	0.167691	0.799024	0.928154
SL016928	SLAF7	-0.0887766	-0.233012	0.0554585	0.22768	0	0.520562	0.440969	-0.258179	-0.449548	-0.0668109	0.0081877	0.0770418
SL004299	Livin B	0.161719	-0.101523	0.424961	0.22856	0.690663	0.0721807	0.441873	0.0864641	-0.146313	0.319241	0.466602	0.773355
SL005191	ILT-4	-0.0895744	-0.235484	0.0563349	0.228887	0	0.853572	0.441873	-0.229638	-0.423412	-0.0358652	0.0201936	0.128358
SL000658	GAS1	-0.0896058	-0.235869	0.0566576	0.229852	0	0.395233	0.442299	-0.0564933	-0.250884	0.137898	0.56895	0.819308
SL005034	RAN	-0.106668	-0.280811	0.067475	0.22993	0.297485	0.232835	0.442299	-0.0574881	-0.251219	0.136243	0.560833	0.818177
SL013872	LRP1B	0.0891942	-0.0565114	0.2349	0.230218	0	0.676848	0.442299	0.155539	-0.03826	0.349339	0.115713	0.379347
SL005195	LAG-3	-0.233182	-0.615145	0.14878	0.23149	0.855918	0.00842651	0.443517	-0.28903	-0.591115	0.0130547	0.0607565	0.258172
SL000070	Glypican 3	-0.0891708	-0.235269	0.0569272	0.231594	0	0.560517	0.443517	-0.0558925	-0.250239	0.138454	0.572979	0.819684
SL002517	TNF-a	0.0882605	-0.0570624	0.233583	0.233903	0	0.637992	0.447222	0.155471	-0.037727	0.348669	0.114743	0.379309
SL012469	GPC5	0.0876908	-0.0572747	0.232656	0.235781	0	0.526901	0.449648	0.0996396	-0.0932401	0.292519	0.311301	0.648091
SL010927	IMB1	-0.0974164	-0.258509	0.0636761	0.235924	0.181332	0.269067	0.449648	-0.069131	-0.300569	0.162307	0.558248	0.818177
SL016555	PDE11	0.129021	-0.0849951	0.343038	0.237373	0.5392	0.140714	0.451689	0.314047	0.122155	0.505939	0.00133827	0.0276012
SL009768	CBX5	0.0878644	-0.0582261	0.233955	0.238479	0	0.45164	0.453002	0.0791367	-0.115223	0.273496	0.424852	0.739007
SL000605	Ubiquitin+1	-0.0875951	-0.233445	0.0582543	0.239145	0	0.553005	0.453002	-0.226678	-0.420147	-0.0332086	0.0216537	0.133611
SL002823	sL-Selectin	0.115835	-0.0770576	0.308728	0.2392	0.430466	0.185147	0.453002	0.0917767	-0.453207	0.636761	0.741352	0.907701
SL000299	b-ECGF	0.0904317	-0.0608949	0.241758	0.241494	0.0640077	0.301311	0.456202	-0.0081533	-0.202666	0.18636	0.934524	0.975779
SL011405	PDE5A	0.087368	-0.0588814	0.233617	0.241653	0	0.374515	0.456202	-0.0159659	-0.210379	0.178447	0.872125	0.955746
SL002561	PTHrP	0.0850822	-0.058121	0.228285	0.244227	0	0.367334	0.460334	0.189014	-0.00131417	0.379343	0.051603	0.23129
SL004649	OX40 Ligand	-0.0866569	-0.232811	0.059497	0.245198	0	0.807698	0.461435	-0.114483	-0.308965	0.0799981	0.248602	0.572166
SL004670	Artemin	0.0884012	-0.0608398	0.237642	0.245657	0.0418513	0.306967	0.461573	0.0678398	-0.126461	0.262141	0.493775	0.784315
SL007531	BMPER	0.0879575	-0.0609111	0.236826	0.246854	0.0326685	0.309274	0.463093	-0.02241	-0.2169	0.17208	0.821329	0.932088
SL000516	MCP-3	-0.0852825	-0.230674	0.0601087	0.250284	0	0.707295	0.468791	-0.0489897	-0.242348	0.144368	0.619484	0.846614
SL015728	GCKR	0.0974522	-0.0692883	0.264193	0.251998	0.229933	0.254471	0.471264	-0.0182557	-0.21218	0.175669	0.853615	0.952447
SL001766	HCG	-0.167041	-0.453286	0.119204	0.252724	0.741062	0.0493936	0.471882	-0.318447	-0.510884	-0.12601	0.00118124	0.0266337
SL008102	MDHC	0.116134	-0.0831043	0.315373	0.25327	0.463506	0.172169	0.472164	-0.0628848	-0.348463	0.222693	0.666041	0.866792
SL004759	eIF-5	-0.0845276	-0.230721	0.0616653	0.257115	0	0.68299	0.478587	-0.102773	-0.297316	0.0917696	0.300477	0.634831
SL005221	SREC-I	-0.191814	-0.524533	0.140905	0.258507	0.809686	0.0218904	0.480376	-0.135801	-0.588144	0.316542	0.556255	0.818177
SL004737	Tropomyosin 1 alpha chain	0.0834079	-0.0615371	0.228353	0.259382	0	0.510657	0.480376	0.134059	-0.0587804	0.326899	0.173028	0.480858
SL008099	CAPG	-0.0836908	-0.229233	0.0618519	0.25973	0	0.758229	0.480376	-0.223455	-0.416747	-0.0301631	0.0234627	0.14088
SL005227	ULBP-1	0.0840809	-0.0622246	0.230386	0.260005	0	0.997583	0.480376	0.24763	0.0535703	0.44169	0.0123839	0.0960956
SL014209	KLRF1	0.0942622	-0.0697874	0.258312	0.260086	0.209207	0.260791	0.480376	0.123579	-0.070231	0.31739	0.211397	0.534695
SL000057	Thymidine kinase	0.0866318	-0.0644156	0.237679	0.260963	0.0607704	0.302145	0.481251	0.000282211	-0.194259	0.194823	0.997731	0.997731
SL000346	Cathepsin H	-0.0829135	-0.22868	0.0628526	0.264914	0	0.620378	0.487785	-0.0210504	-0.335803	0.293703	0.895712	0.96916
SL000055	Cadherin E	-0.0823589	-0.227541	0.0628229	0.266202	0	0.503565	0.489402	-0.0975801	-0.290761	0.0956006	0.322163	0.662328
SL003191	NAP-2	0.0824532	-0.0631152	0.228022	0.266927	0	0.593443	0.489498	0.255396	0.0623115	0.44848	0.00952874	0.0837268
SL008644	BST1	-0.111797	-0.309233	0.0856378	0.267074	0.448671	0.178053	0.489498	-0.140175	-0.33463	0.0542804	0.157698	0.458513
SL005263	RAP	0.0825663	-0.0635866	0.228719	0.268188	0	0.369849	0.490192	0.0774606	-0.117033	0.271954	0.435043	0.748024
SL005308	PSME3	0.0822577	-0.0633746	0.22789	0.268273	0	0.536665	0.490192	0.0216658	-0.172054	0.215386	0.826491	0.932632
SL003915	kallikrein 8	-0.150349	-0.417444	0.116746	0.269908	0.700747	0.0675468	0.492427	-0.0624706	-0.346771	0.221829	0.666707	0.866792
SL004860	HTRA2	-0.081139	-0.226087	0.0638089	0.272576	0	0.481101	0.496537	0.0854804	-0.106731	0.277692	0.383406	0.71678
SL003324	Coagulation Factor Xa	0.0808637	-0.0638704	0.225598	0.273498	0	0.617476	0.497459	0.2879	0.0961778	0.479623	0.00324857	0.0451864
SL004771	Aurora kinase A	0.0811489	-0.0644784	0.226776	0.274761	0	0.872651	0.498996	0.143986	-0.0496138	0.337587	0.144927	0.436242
SL013928	PPIE	-0.0824769	-0.230884	0.0659305	0.276047	0.0562855	0.303297	0.50057	-0.0714915	-0.263281	0.120298	0.465026	0.772887
SL004644	EDA	-0.139748	-0.391804	0.112307	0.277182	0.663907	0.0845409	0.501867	-0.0548531	-0.40439	0.294684	0.758403	0.914725
SL004515	PGRP-S	0.0804455	-0.0652068	0.226098	0.279025	0	0.707096	0.504042	-0.0273935	-0.220745	0.165958	0.781256	0.921809
SL000584	TGF-b1	0.0803742	-0.0653244	0.226073	0.279605	0	0.957633	0.504042	0.0294407	-0.164393	0.223275	0.765939	0.917131
SL005157	DC-SIGN	-0.111585	-0.313881	0.09071	0.279648	0.495703	0.159079	0.504042	-0.0931701	-0.283544	0.0972041	0.33745	0.678877
SL000396	Cytochrome c	-0.167565	-0.471886	0.136755	0.2805	0.770901	0.036686	0.504815	-0.0620348	-0.62285	0.49878	0.828362	0.932981
SL005158	DC-SIGNR	0.0797742	-0.0653718	0.22492	0.281381	0	0.374827	0.505371	0.129923	-0.0631259	0.322971	0.187147	0.50033
SL008143	UBE2N	-0.0799753	-0.22557	0.0656193	0.281654	0	0.524074	0.505371	-0.0394795	-0.233184	0.154225	0.68955	0.879264
SL000268	Angiostatin	0.121433	-0.100487	0.343353	0.283505	0.569674	0.127407	0.507058	0.114077	-0.256534	0.484688	0.546315	0.818104
SL010464	LRIG3	-0.079769	-0.225566	0.0660282	0.283567	0	0.534195	0.507058	0.0812886	-0.112082	0.27466	0.409983	0.736453
SL007806	IL22RA1	0.0800284	-0.0663343	0.226391	0.283867	0	0.961587	0.507058	-0.0340479	-0.228514	0.160419	0.73148	0.904885
SL010613	IL-17 RD	-0.0796222	-0.225574	0.0663298	0.284965	0	0.475358	0.508259	0.0445867	-0.149323	0.238496	0.652231	0.860832
SL004580	Macrophage scavenger receptor	0.0795931	-0.0664676	0.225654	0.285499	0	0.86065	0.508453	0.0658204	-0.156168	0.287809	0.561149	0.818177
SL016548	AMPK a1b1g1	0.0783957	-0.0658142	0.222606	0.286659	0	0.667353	0.509002	0.101691	-0.0900971	0.29348	0.2987	0.634831
SL011528	RS7	0.0794464	-0.0667822	0.225675	0.286942	0	0.770147	0.509002	-0.0704145	-0.264443	0.123614	0.476906	0.777822
SL006922	RAD51	-0.0842286	-0.239305	0.0708482	0.287086	0.117793	0.287026	0.509002	0.0951487	-0.0978287	0.288126	0.333858	0.675026
SL014093	ENTP3	0.0791989	-0.0669597	0.225357	0.288215	0	0.734119	0.510248	-0.00882876	-0.203182	0.185525	0.929055	0.975151
SL008759	GPVI	-0.0784927	-0.223547	0.0665617	0.288878	0	0.609653	0.510664	0.0428057	-0.149923	0.235535	0.663335	0.866487
SL010348	FN1.4	0.0783253	-0.0668341	0.223485	0.290256	0	0.614847	0.512075	0.0831773	-0.109878	0.276233	0.398422	0.728711
SL003848	Annexin V	-0.132691	-0.378923	0.113541	0.290877	0.648167	0.091815	0.512075	0.0364458	-0.15674	0.229631	0.711561	0.895069
SL010373	FCAR	0.0771946	-0.0660786	0.220468	0.290961	0	0.769905	0.512075	0.0812485	-0.109379	0.271876	0.403512	0.730889
SL008331	PA2G4	0.124849	-0.107269	0.356967	0.29179	0.607184	0.110593	0.512667	0.100809	-0.166349	0.367968	0.459561	0.768078
SL007324	CSK21	0.104898	-0.0902751	0.300071	0.292156	0.43519	0.183319	0.512667	0.114389	-0.0799481	0.308726	0.248641	0.572166
SL011769	AN32B	-0.0781751	-0.224153	0.0678028	0.293896	0	0.806143	0.514964	-0.0480236	-0.241995	0.145948	0.6275	0.850546
SL010528	UFM1	-0.0778679	-0.223659	0.0679236	0.29518	0	0.457915	0.516457	-0.0241852	-0.218138	0.169768	0.806921	0.928154
SL014096	LRRT1	0.0771878	-0.0675979	0.221973	0.296073	0	0.83631	0.516635	0.0241169	-0.168488	0.216722	0.806135	0.928154
SL004589	Azurocidin	-0.0774832	-0.222845	0.0678787	0.296147	0	0.565493	0.516635	-0.121096	-0.314357	0.0721641	0.219407	0.546232
SL002922	sICAM-1	-0.0771152	-0.222041	0.0678102	0.296993	0	0.651496	0.517357	-0.122906	-0.315711	0.0698993	0.211518	0.534695
SL004139	Ephrin-A3	-0.0688003	-0.198259	0.0606587	0.297591	0	0.761428	0.517644	0.0150461	-0.156921	0.187013	0.863843	0.955746
SL002688	Osteopontin	-0.0931343	-0.268737	0.0824681	0.298569	0.330057	0.221804	0.51859	0.0239356	-0.244957	0.292828	0.861498	0.955746
SL017128	LRRK2	0.0768646	-0.0685441	0.222273	0.300175	0	0.934501	0.520319	0.229808	0.0248208	0.434794	0.028	0.157089
SL007888	Cystatin-S	0.0857188	-0.0766926	0.24813	0.300928	0.210682	0.260346	0.520319	0.0587726	-0.133063	0.250609	0.548191	0.818177
SL010457	DLL4	0.0768448	-0.0688313	0.222521	0.301188	0	0.921441	0.520319	-0.0966876	-0.289828	0.0964529	0.326508	0.66583
SL004861	IL-18 Rb	0.141332	-0.126734	0.409398	0.301442	0.704296	0.0659216	0.520319	0.0902728	-0.102834	0.28338	0.359544	0.698625
SL004814	Coactosin-like protein	0.0913564	-0.082028	0.264741	0.301741	0.29325	0.23424	0.520319	0.327183	0.135086	0.519281	0.000843108	0.024273
SL001815	Mn SOD	-0.0847861	-0.24664	0.0770674	0.304554	0.195093	0.265013	0.524412	0.0959951	-0.0963213	0.288312	0.327916	0.666428
SL003341	Fibrinogen g-chain dimer	-0.110747	-0.322895	0.101402	0.306236	0.533715	0.143071	0.52655	-0.179289	-0.575155	0.216577	0.374716	0.708522
SL004739	ITI heavy chain H4	-0.144	-0.420816	0.132815	0.307927	0.722614	0.0576033	0.528696	-0.182176	-0.374547	0.0101945	0.0634396	0.263358
SL007373	PPID	0.0741687	-0.0690763	0.217414	0.310191	0	0.840087	0.53182	0.157264	-0.0603043	0.374832	0.156567	0.456336
SL005228	ULBP-2	0.126587	-0.118415	0.371589	0.311217	0.642956	0.0942186	0.532577	0.128037	-0.102664	0.358739	0.2767	0.609569
SL003327	Factor D	0.0751178	-0.0703605	0.220596	0.311524	0	0.494692	0.532577	-0.261326	-0.587355	0.0647038	0.116185	0.379347
SL006998	PDPK1	-0.0745323	-0.219896	0.0708313	0.314929	0	0.849891	0.53763	0.0485052	-0.144625	0.241635	0.622542	0.847831
SL014269	KI3L2	0.0745942	-0.0714027	0.220591	0.316631	0	0.762243	0.539764	0.0707472	-0.123493	0.264988	0.475309	0.777822
SL000020	Apo B	-0.132826	-0.393268	0.127616	0.31751	0.686517	0.0740918	0.539943	0.0105062	-0.215417	0.23643	0.927377	0.975151
SL004155	PDGF Rb	-0.0743864	-0.22041	0.0716375	0.318071	0	0.732348	0.539943	-0.0676949	-0.261996	0.126606	0.494697	0.784315
SL013240	CRK	-0.0742421	-0.219989	0.0715049	0.318092	0	0.592161	0.539943	-0.242101	-0.486365	0.00216402	0.0520645	0.23129
SL000076	p27Kip1	-0.0743702	-0.22065	0.0719095	0.319023	0	0.320282	0.540635	-0.0974358	-0.29207	0.0971985	0.326505	0.66583
SL001716	IL-12	-0.0743106	-0.220588	0.071967	0.319404	0	0.485055	0.540635	-0.0445182	-0.23916	0.150124	0.653952	0.860832
SL000300	b-Endorphin	-0.0747309	-0.224602	0.0751398	0.328417	0.0660766	0.300776	0.555103	-0.00897276	-0.201508	0.183562	0.927222	0.975151
SL003679	IGF-II receptor	-0.0717158	-0.21581	0.0723785	0.329325	0	0.784933	0.555852	-0.139901	-0.331545	0.0517419	0.15249	0.449917
SL004010	SCF sR	-0.0720348	-0.217437	0.0733671	0.331547	0	0.621755	0.558814	0.177364	-0.0149008	0.36963	0.0705965	0.282818
SL000508	Lymphotoxin a2/b1	0.0722358	-0.0739061	0.218378	0.332654	0	0.383116	0.55989	-0.0218889	-0.440713	0.396935	0.918413	0.975151
SL008933	PARK7	-0.105528	-0.319247	0.108192	0.333162	0.529138	0.14503	0.559956	-0.200626	-0.395887	-0.00536613	0.0440276	0.214798
SL000557	PKC-Z	0.072163	-0.0742921	0.218618	0.334177	0	0.742666	0.560872	-0.161941	-0.355516	0.0316345	0.101075	0.352143
SL008071	14-3-3 protein theta	0.0715518	-0.0739995	0.217103	0.335296	0	0.553312	0.561765	0.219402	0.0261426	0.412662	0.0260751	0.152654
SL005789	Stanniocalcin-1	-0.07809	-0.237057	0.0808775	0.335649	0.175658	0.270721	0.561765	-0.230003	-0.503974	0.0439668	0.0998815	0.350245
SL005222	SREC-II	0.0706539	-0.0733418	0.21465	0.336206	0	0.566143	0.56191	0.0626519	-0.207633	0.332937	0.649599	0.859658
SL004827	S100A6	-0.0714233	-0.217426	0.0745793	0.33766	0	0.34716	0.563553	-0.00983362	-0.291362	0.271695	0.945419	0.976441
SL004343	Flt3 ligand	0.0708968	-0.0743747	0.216168	0.338809	0	0.973527	0.564682	0.0461224	-0.14701	0.239255	0.639739	0.85705
SL000130	Cyclin B1	0.0703061	-0.0740572	0.214669	0.339821	0	0.488861	0.565237	0.0601208	-0.131991	0.252233	0.539635	0.813243
SL003186	Lymphotactin	0.0710851	-0.075033	0.217203	0.340334	0	0.822149	0.565237	-0.0206581	-0.214942	0.173626	0.834915	0.937024
SL001973	Mammaglobin 2	-0.0999741	-0.305571	0.105623	0.340561	0.497688	0.158258	0.565237	0.161121	-0.0308453	0.353088	0.0999623	0.350245
SL004914	PPase	-0.0704489	-0.216347	0.0754488	0.343946	0	0.890346	0.570062	0.104218	-0.0892236	0.29766	0.290993	0.629957
SL008176	PSME1	-0.0693421	-0.21427	0.0755858	0.348366	0	0.610697	0.576589	0.0802274	-0.112181	0.272635	0.413793	0.737365
SL000581	SOD	-0.0695542	-0.215706	0.0765974	0.350946	0	0.994557	0.580056	-0.0140313	-0.208448	0.180385	0.887512	0.965917
SL014009	HDGR2	0.0690465	-0.0771406	0.215234	0.35459	0	0.860215	0.58527	-0.140545	-0.334226	0.0531347	0.15495	0.453836
SL003305	IL-2 sRa	-0.0669983	-0.209385	0.0753883	0.356405	0	0.486737	0.587454	-0.0686404	-0.258146	0.120866	0.477758	0.777822
SL010500	LYNB	-0.0968704	-0.303488	0.109747	0.358145	0.504484	0.155434	0.588942	0.0534325	-0.179213	0.286078	0.6526	0.860832
SL010516	SRCN1	-0.115428	-0.361992	0.131136	0.358854	0.64978	0.0910706	0.588942	0.0629149	-0.129949	0.255779	0.522584	0.804738
SL006892	ABL1	0.0897578	-0.102099	0.281615	0.359172	0.425831	0.18693	0.588942	0.00972636	-0.195299	0.214752	0.925919	0.975151
SL008609	FCG3B	0.0703155	-0.0800171	0.220648	0.359279	0.0653052	0.300975	0.588942	-0.170286	-0.531955	0.191382	0.3561	0.696465
SL005155	Cripto	0.0679906	-0.0778966	0.213878	0.361011	0	0.565662	0.589751	0.113734	-0.0803359	0.307805	0.250708	0.573938
SL004326	TNFSF18	0.0678005	-0.0777692	0.21337	0.36131	0	0.88525	0.589751	0.115984	-0.0776881	0.309656	0.240491	0.567959
SL004209	annexin II	-0.0698667	-0.219988	0.080255	0.36168	0.0596094	0.302444	0.589751	-0.205882	-0.399137	-0.0126266	0.0367959	0.188717
SL007237	MP2K4	-0.113334	-0.357014	0.130346	0.361997	0.643383	0.0940219	0.589751	0.0801344	-0.112242	0.272511	0.414259	0.737365
SL003179	Integrin a1b1	0.233448	-0.268744	0.735641	0.36224	0.917087	0.000514938	0.589751	-0.0645649	-0.598132	0.469002	0.812527	0.928154
SL000572	SAA	0.0672809	-0.0779672	0.212529	0.36394	0	0.935122	0.591713	-0.224357	-0.415825	-0.0328883	0.0216401	0.133611
[truncated: 460 more rows]

## Sheet: MD
MD
Unadjusted model
Variable	Name	Effect	Lower	Upper	P-value	I2	Heterogeneity	P-value (FDR)
[truncated: 1,195 more rows]

## Sheet: MDH
MDH
[truncated: 1,197 more rows]
